# Supplementary material for: Circular RNAs Are the Predominant Transcript Isoform from Hundreds of Human Genes in Diverse Cell Types
Source: PLoS One. 2012 Feb 1;7(2):e30733. doi: 10.1371/journal.pone.0030733 (PMC3270023; doi:10.1371/journal.pone.0030733)
Supplement: Table S1 — List of scrambled isoforms detected in the leukemia data with RefSeq exon enumeration beginning at exon 0. (TAB) [file pone.0030733.s005.tab]

name	NMID	exon1	exon2	reads
APOOL	NM_198450	7	2	1
SUCLG2	NM_003848	8	7	1
ST8SIA4	NM_005668	3	2	1
ADAMTS6	NM_197941	6	3	1
MAP3K5	NM_005923	6	1	1
ARPC1A	NM_006409	4	1	1
ILKAP	NM_030768	8	5	248
BRCA2	NM_000059	15	12	1
MGA	NM_001080541	8	5	1
LRCH3	NM_032773	7	1	1
USP34	NM_014709	58	57	7
FAM126B	NM_173822	4	1	1
ZC3H13	NM_015070	4	1	1
REST	NM_005612	2	1	1
USP34	NM_014709	14	5	2
CHD2	NM_001271	36	33	1
HSPB11	NM_016126	3	1	1
RAD23B	NM_002874	3	1	2
SEC23A	NM_006364	8	3	1
ANAPC1	NM_022662	20	2	1
PLCG2	NM_002661	16	13	2
SFMBT2	NM_001029880	10	6	1
MFSD8	NM_152778	11	6	7
PARG	NM_003631	8	1	1
TGS1	NM_024831	9	2	1
PRDM4	NM_012406	7	5	1
MSH3	NM_002439	12	8	2
ANKRD52	NM_173595	14	5	1
UHRF2	NM_152896	12	5	2
TBC1D12	NM_015188	8	2	1
TTC7A	NM_020458	4	3	4
ZFX	NM_003410	3	2	74
ZNF148	NM_021964	4	3	1
CRLF3	NM_015986	6	5	12
HUWE1	NM_031407	29	24	1
ESYT2	NM_020728	5	1	57
IGF2R	NM_000876	3	1	1
DDX49	NM_019070	8	6	2
SEL1L3	NM_015187	16	11	1
UBA2	NM_005499	5	1	9
SDCCAG8	NM_006642	8	5	1
ABCA13	NM_152701	41	39	1
BARD1	NM_000465	6	3	1
ABCC5	NM_005688	16	1	1
RBM6	NM_005777	10	7	2
SGK269	NM_024776	2	2	1
KIF16B	NM_024704	2	1	1
CSMD1	NM_033225	59	57	1
KNTC1	NM_014708	29	20	1
STK39	NM_013233	8	5	20
ZFAND6	NM_019006	4	2	7
MYO9A	NM_006901	2	1	1
XRCC6	NM_001469	4	3	2
ATAD2B	NM_017552	18	15	5
FOXJ3	NM_014947	3	1	2
TRA2A	NM_013293	4	2	2
SETD2	NM_014159	4	1	1
ZNF208	NM_007153	2	1	1
COQ3	NM_017421	4	1	2
KIF3B	NM_004798	4	1	1
LRP5	NM_002335	8	7	2
SAFB	NM_002967	13	8	1
CSE1L	NM_001316	18	16	1
ETS2	NM_005239	6	1	1
TECPR1	NM_015395	16	15	3
RICS	NM_001142685	4	1	1
TRIP11	NM_004239	15	7	1
PUS7	NM_019042	14	5	2
CECR7	NR_015352	2	1	1
INPP5B	NM_005540	22	19	2
RASGRP1	NM_005739	11	9	1
UNC84B	NM_015374	8	2	1
ARPP-21	NM_016300	10	9	2
DHX29	NM_019030	16	11	3
SIK3	NM_025164	22	21	1
KIAA1731	NM_033395	14	13	1
HP1BP3	NM_016287	5	4	1
KDM5B	NM_006618	6	4	2
LARP1B	NM_018078	11	10	1
KNTC1	NM_014708	26	21	1
DMXL2	NM_015263	15	9	2
SCLT1	NM_144643	17	11	1
UTRN	NM_007124	49	8	1
TMEM181	NM_020823	5	1	11
KNTC1	NM_014708	61	42	3
RBM26	NM_022118	10	3	1
NUDC	NM_006600	5	4	64
PAK2	NM_002577	11	3	1
TMCO3	NM_017905	9	7	1
MMP17	NM_016155	8	1	2
KDM1B	NM_153042	16	14	2
ITFG1	NM_030790	9	6	1
PDE3B	NM_000922	3	1	129
CS	NM_004077	6	4	1
NDUFS1	NM_005006	6	5	1
RBM33	NM_053043	4	1	101
SF3B3	NM_012426	7	3	1
UBAP2	NM_018449	8	4	7
MBOAT2	NM_138799	4	1	1
MED12L	NM_053002	13	10	1
RNMTL1	NM_018146	1	1	1
UBA2	NM_005499	15	9	4
AFF2	NM_002025	2	2	1
AKD1	NM_001145128	20	12	1
AATF	NM_012138	7	4	2
CHD2	NM_001271	16	10	1
DDX26B	NM_182540	8	2	27
SFMBT2	NM_001029880	8	1	2
ATAD2B	NM_017552	9	4	1
ABCB7	NM_004299	14	4	2
MARCH7	NM_022826	4	2	1
HAUS6	NM_017645	11	8	1
KIAA0831	NM_014924	6	4	1
PRPF3	NM_004698	8	6	1
ADCY9	NM_001116	7	6	1
SF3B3	NM_012426	17	15	2
ZMPSTE24	NM_005857	5	2	1
AP3B1	NM_003664	21	9	1
GAK	NM_005255	10	5	1
RICS	NM_001142685	8	5	10
GRHPR	NM_012203	3	1	19
LARP1B	NM_018078	16	14	1
FLT3	NM_004119	11	5	1
LRBA	NM_006726	21	16	4
KIAA0907	NM_014949	3	2	2
HTT	NM_002111	5	1	99
PCNX	NM_014982	18	14	1
BTN2A2	NM_006995	3	2	1
CWF19L2	NM_152434	11	8	4
IFNGR2	NM_005534	5	3	1
LOC375190	NM_001145710	6	4	1
PPP1R7	NM_002712	8	2	1
CARD11	NM_032415	4	1	1
NSUN6	NM_182543	7	1	1
FAM116A	NM_152678	6	1	1
CORO7	NM_024535	25	14	1
ATF7IP2	NM_024997	1	1	1
CPNE3	NM_003909	7	2	1
BRD1	NM_014577	5	1	1
PRPF4B	NM_003913	10	2	1
PSMD14	NM_005805	8	3	1
WWC3	NM_015691	7	1	6
WDR43	NM_015131	4	1	1
BRIP1	NM_032043	13	12	2
KIAA1797	NM_017794	6	3	1
MSL1	NM_001012241	2	2	1
TNKS	NM_003747	19	18	1
IMPAD1	NM_017813	3	1	2
KDM1B	NM_153042	4	3	1
POU2F1	NM_002697	15	14	2
TMLHE	NM_018196	5	2	1
PRKCE	NM_005400	5	2	1
YTHDF3	NM_152758	3	3	6
KIF15	NM_020242	7	5	1
CCNB1	NM_031966	6	5	5
PARP4	NM_006437	13	7	4
SETX	NM_015046	18	2	2
RBMS2	NM_002898	4	1	2
UTP6	NM_018428	10	10	1
CHD2	NM_001271	35	32	1
KIF1B	NM_015074	40	36	1
MYO5C	NM_018728	28	20	1
RNF168	NM_152617	2	1	10
ASAP1	NM_018482	11	1	1
FBXL3	NM_012158	2	1	2
ITPR2	NM_002223	25	21	1
DNAJB11	NM_016306	8	6	1
MIB1	NM_020774	6	1	2
GANC	NM_198141	4	3	1
SFMBT2	NM_001029880	8	4	51
AHCTF1	NM_015446	25	23	1
UTP6	NM_018428	12	10	1
TMOD3	NM_014547	8	2	2
ARHGEF12	NM_015313	35	31	19
C3orf1	NM_016589	5	1	13
MCM6	NM_005915	7	6	2
TRIP4	NM_016213	10	1	1
HERC6	NM_017912	12	10	1
AXIN2	NM_004655	1	1	1
NPAT	NM_002519	7	3	1
PDK1	NM_002610	4	1	7
WSB1	NM_015626	5	1	1
FLNB	NM_001457	23	11	1
PFTK1	NM_012395	8	7	1
AKAP10	NM_007202	9	3	1
NOS2	NM_000625	19	18	3
RPRD2	NM_015203	6	2	1
BRCA2	NM_000059	17	14	1
MORC3	NM_015358	15	14	1
ZMIZ1	NM_020338	3	1	1
PIKFYVE	NM_015040	34	32	23
SBNO1	NM_018183	26	20	1
MCCC1	NM_020166	6	5	2
SBF2	NM_030962	35	30	1
STAG1	NM_005862	20	16	4
H2AFY2	NM_018649	3	2	1
AGPAT5	NM_018361	5	1	11
ZNF516	NM_014643	2	2	1
TCF25	NM_014972	11	7	6
BCKDHA	NM_000709	4	4	2
PGS1	NM_024419	3	2	1
ZNFX1	NM_021035	8	6	1
DOCK11	NM_144658	22	1	1
KIAA0753	NM_014804	11	7	1
SMC3	NM_005445	19	18	1
UBR5	NM_015902	54	53	1
GOLPH3	NM_022130	2	1	4
ANKRD44	NM_153697	8	6	1
GFPT1	NM_002056	3	1	1
MDN1	NM_014611	1	1	1
PRUNE	NM_021222	6	4	1
SDCCAG8	NM_006642	4	1	1
TSPAN14	NM_030927	4	3	1
EEA1	NM_003566	20	20	1
MRS2	NM_020662	8	6	2
CEP110	NM_007018	12	10	1
SH3TC1	NM_018986	4	3	1
QSER1	NM_001076786	7	4	1
USO1	NM_003715	7	2	1
SEC23IP	NM_007190	14	12	1
RSPRY1	NM_133368	1	1	1
KCTD3	NM_016121	9	8	1
GLDC	NM_000170	20	5	1
CEP192	NM_032142	19	1	1
IARS2	NM_018060	6	3	1
SETD2	NM_014159	8	5	40
FARSA	NM_004461	6	4	3
CYP2U1	NM_183075	2	1	1
FIG4	NM_014845	2	1	4
KIAA0528	NM_014802	10	9	1
PSTPIP1	NM_003978	2	1	1
DYNC1LI1	NM_016141	4	2	5
NUP205	NM_015135	16	14	1
PIK3AP1	NM_152309	15	8	1
MCM3	NM_002388	11	9	1
PGK1	NM_000291	9	6	1
UXS1	NM_025076	6	1	5
CLUAP1	NM_015041	4	1	1
ATP9B	NM_198531	14	12	4
PLCG2	NM_002661	14	11	1
PTPN9	NM_002833	7	1	4
SF3B3	NM_012426	7	4	2
UBAP2	NM_018449	8	3	1
XPO1	NM_003400	3	2	1
RNPEP	NM_020216	8	6	1
NMNAT1	NM_022787	3	1	1
PIK3C2A	NM_002645	24	19	1
ITCH	NM_031483	22	20	2
QRICH2	NM_032134	3	3	1
RNF220	NM_018150	1	1	9
SOAT1	NM_003101	6	4	1
THBS3	NM_007112	12	12	3
SLC30A9	NM_006345	6	1	1
FRYL	NM_015030	34	33	1
EBF1	NM_024007	10	6	1
MAP4K3	NM_003618	16	15	1
NPEPPS	NM_006310	17	9	1
NEK9	NM_033116	15	13	1
ATP9B	NM_198531	10	8	3
PI4KB	NM_002651	1	1	8
UBR5	NM_015902	36	35	2
ARPC1B	NM_005720	8	3	1
GRHPR	NM_012203	7	1	1
MDFIC	NM_199072	3	3	1
RPA1	NM_002945	3	1	2
CHD2	NM_001271	30	28	6
FBXO30	NM_032145	1	1	5
MELK	NM_014791	7	5	1
ARL6IP1	NM_015161	2	1	1
CCDC46	NM_145036	20	19	1
ERCC4	NM_005236	7	6	6
ANKIB1	NM_019004	5	4	1
NSUN6	NM_182543	7	3	2
PASK	NM_015148	2	2	11
ZKSCAN1	NM_003439	4	1	1
RTTN	NM_173630	29	28	1
CEP192	NM_032142	29	15	1
MYH9	NM_002473	2	1	4
UTRN	NM_007124	28	25	5
WWC3	NM_015691	7	3	1
KDM1B	NM_153042	6	2	2
REXO4	NM_020385	3	2	17
AKAP10	NM_007202	7	4	1
SMCHD1	NM_015295	28	24	1
VEZT	NM_017599	6	4	1
HERC2	NM_004667	22	20	1
ITPR2	NM_002223	31	26	1
RFC1	NM_002913	8	6	1
CCDC134	NM_024821	5	1	2
UBA2	NM_005499	15	1	2
BRAF	NM_004333	6	3	6
DCAF15	NM_138353	10	3	4
HUWE1	NM_031407	67	65	1
NPAT	NM_002519	9	4	2
CABIN1	NM_012295	28	26	1
HNRNPA3	NM_194247	3	1	1
ASAP1	NM_018482	10	4	1
GLCCI1	NM_138426	5	2	1
RPRD1A	NM_018170	5	1	2
UBXN4	NM_014607	8	6	1
NUPL2	NM_007342	1	1	9
C2orf29	NM_017546	4	2	1
KIF16B	NM_024704	10	3	1
EHMT1	NM_024757	24	18	11
MAP3K2	NM_006609	13	8	1
SFMBT2	NM_001029880	3	2	1
ASH1L	NM_018489	5	3	2
PSTPIP2	NM_024430	9	7	1
ARID2	NM_152641	10	6	7
PACSIN2	NM_007229	3	3	2
HMGCL	NM_000191	4	1	4
NHLRC2	NM_198514	9	7	1
USPL1	NM_005800	3	3	1
NBEA	NM_015678	10	2	1
EZH1	NM_001991	6	1	1
USPL1	NM_005800	7	1	1
ITPR2	NM_002223	33	26	1
PHC3	NM_024947	9	8	1
REV3L	NM_002912	8	4	1
FAM114A2	NM_018691	3	1	32
NUP153	NM_005124	6	5	1
FNBP4	NM_015308	3	2	3
GNPTAB	NM_024312	18	15	2
NCAPD3	NM_015261	18	16	1
SIPA1L2	NM_020808	6	4	2
TOP2B	NM_001068	32	21	1
UBE2G1	NM_003342	4	1	9
LYST	NM_000081	2	1	1
AFF1	NM_005935	2	1	61
ACER2	NM_001010887	3	1	2
INO80	NM_017553	23	14	1
CHMP4A	NM_014169	2	1	1
OMA1	NM_145243	7	2	4
PIP5K1C	NM_012398	7	1	5
MGA	NM_001080541	1	1	339
AACS	NM_023928	7	5	1
CCDC45	NM_138363	9	7	1
CEP70	NM_024491	5	2	74
TTC7A	NM_020458	4	1	6
C5orf42	NM_023073	50	45	1
MCM3AP	NM_003906	3	2	1
GNAQ	NM_002072	4	2	3
EIF2S3	NM_001415	8	7	1
NDUFA10	NM_004544	8	4	13
FLT3	NM_004119	18	5	4
BARD1	NM_000465	6	1	1
SF3B3	NM_012426	9	4	1
AARS	NM_001605	13	11	26
MGA	NM_001080541	16	14	1
NT5C3L	NM_052935	5	4	1
QSER1	NM_001076786	3	1	2
TBCD	NM_005993	18	14	2
CLNS1A	NM_001293	3	2	3
RBM6	NM_005777	4	2	10
ADAMTS17	NM_139057	11	10	1
UBE2F	NM_080678	7	5	2
ME2	NM_002396	14	6	2
UBA2	NM_005499	13	9	1
PRUNE	NM_021222	6	3	8
TRRAP	NM_003496	42	24	1
ATR	NM_001184	24	5	2
KIAA1012	NM_014939	11	6	1
NUP133	NM_018230	22	16	1
PITRM1	NM_014889	10	7	2
ALMS1	NM_015120	8	6	1
HERC6	NM_017912	4	3	1
ADAMTS6	NM_197941	6	1	19
PCNT	NM_006031	7	6	1
MAP3K5	NM_005923	6	3	2
LRCH3	NM_032773	3	1	1
MTHFD2L	NM_001144978	4	1	1
USP18	NM_017414	7	4	1
TTF1	NM_007344	3	1	1
GOLGA3	NM_005895	5	1	3
PCNT	NM_006031	15	1	1
AP4B1	NM_006594	7	3	1
EZH1	NM_001991	9	5	1
STT3A	NM_152713	8	2	1
BCAR3	NM_003567	8	5	1
CNOT6	NM_015455	3	2	1
ASH1L	NM_018489	2	2	1
USP37	NM_020935	19	14	1
TMEM181	NM_020823	9	6	1
FANCA	NM_000135	29	28	4
SAPS2	NM_014678	2	1	5
DHX33	NM_020162	9	2	1
PHC3	NM_024947	5	4	10
SART3	NM_014706	3	1	1
CCDC21	NM_022778	8	7	5
SMYD4	NM_052928	4	4	2
TDG	NM_003211	3	1	4
IARS2	NM_018060	11	7	1
SLC35E1	NM_024881	3	2	3
KIAA0528	NM_014802	11	9	1
PAK2	NM_002577	12	9	1
DOCK8	NM_203447	14	11	2
CRLF3	NM_015986	3	1	1
CARD8	NM_014959	3	1	1
CDC6	NM_001254	3	2	1
PARP12	NM_022750	4	1	12
NPC1	NM_000271	4	2	1
SLC25A30	NM_001010875	2	1	1
UXS1	NM_025076	9	5	4
FAM193A	NM_003704	16	16	1
TMEM38B	NM_018112	3	1	1
UBR4	NM_020765	6	1	2
NUP54	NM_017426	4	1	373
USP3	NM_006537	10	2	1
BTAF1	NM_003972	25	22	17
DPYD	NM_000110	17	8	2
ATM	NM_000051	19	16	1
HERC3	NM_014606	9	3	1
UBA2	NM_005499	14	8	1
CHM	NM_000390	7	1	1
WDR33	NM_018383	10	7	2
AKAP10	NM_007202	3	3	2
SFRS11	NM_004768	8	2	1
TCF25	NM_014972	12	7	1
UPRT	NM_145052	5	1	1
EYA3	NM_001990	15	10	1
ARMC1	NM_018120	2	1	6
MAP3K8	NM_005204	4	4	2
TPR	NM_003292	24	17	1
SHANK3	NM_001080420	21	8	1
STRBP	NM_018387	5	1	1
CELSR1	NM_014246	19	17	4
CENPC1	NM_001812	11	9	1
ZNF800	NM_176814	4	3	1
IFNGR2	NM_005534	5	4	2
SLC15A4	NM_145648	6	1	1
ZNF85	NM_003429	2	1	2
SEC11A	NM_014300	2	1	1
FKBP8	NM_012181	5	4	10
POLB	NM_002690	4	2	4
POLR3A	NM_007055	27	17	1
TMEM181	NM_020823	5	3	1
FKBP4	NM_002014	7	6	1
TALDO1	NM_006755	3	2	1
DDX46	NM_014829	8	5	1
BIRC6	NM_016252	72	67	1
MLL3	NM_170606	12	11	1
C5orf41	NM_153607	3	1	2
FAM169A	NM_015566	4	1	4
AKAP11	NM_016248	8	4	1
PPIL4	NM_139126	6	1	1
SLMAP	NM_007159	19	19	1
MCCC2	NM_022132	5	1	9
NLK	NM_016231	6	4	1
BTAF1	NM_003972	18	14	1
GTSE1	NM_016426	8	6	6
DYNC2H1	NM_001080463	82	76	1
LRBA	NM_006726	26	20	1
C12orf30	NM_024953	7	5	2
TM7SF3	NM_016551	7	1	1
COG3	NM_031431	18	16	4
LRRC45	NM_144999	14	13	1
MIPEP	NM_005932	13	10	1
VAV3	NM_006113	17	15	4
BAZ2B	NM_013450	24	20	1
C10orf119	NM_024834	7	6	1
SENP2	NM_021627	8	1	1
RABEPK	NM_005833	4	3	2
SFT2D2	NM_199344	2	1	1
KPNB1	NM_002265	8	6	1
LUC7L2	NM_016019	6	2	11
HACE1	NM_020771	5	4	1
MYCBP2	NM_015057	30	27	1
ATP9A	NM_006045	13	7	1
PDCL3	NM_024065	3	2	1
PIK3C3	NM_002647	16	11	1
RPS6KB1	NM_003161	12	9	1
RAD23B	NM_002874	8	5	1
AKR1E2	NM_001040177	7	1	1
DAGLB	NM_139179	4	3	9
ZNF236	NM_007345	3	1	1
DOCK2	NM_004946	26	25	1
USP36	NM_025090	15	15	1
C2CD3	NM_015531	20	12	1
PLIN2	NM_001122	5	3	2
TADA1	NM_053053	4	1	1
ZFR	NM_016107	11	9	1
DHTKD1	NM_018706	15	13	1
GUSB	NM_000181	4	1	1
KIAA0146	NM_001080394	4	1	2
GSR	NM_000637	3	1	2
MND1	NM_032117	5	4	1
GK5	NM_001039547	10	4	1
SGMS1	NM_147156	5	3	1
EPHB4	NM_004444	11	10	4
DYNC1H1	NM_001376	14	10	1
PHLPP1	NM_194449	2	2	1
XPO6	NM_015171	12	11	1
WDR27	NM_182552	22	13	1
RBM4	NM_002896	2	2	2
NAV1	NM_020443	2	1	1
ELP3	NM_018091	13	10	47
NPAT	NM_002519	6	2	1
SMARCC1	NM_003074	23	15	2
FLI1	NM_002017	3	1	3
TRIM35	NM_171982	2	2	2
ASPM	NM_018136	25	12	1
JARID2	NM_004973	4	2	6
CCNI	NM_006835	4	1	1
DCAF17	NM_025000	7	3	7
SETD2	NM_014159	9	3	1
FAM179B	NM_015091	10	5	1
PTPN4	NM_002830	25	20	1
C1orf58	NM_144695	6	1	1
COPG	NM_016128	20	10	1
PDIA4	NM_004911	3	2	1
CCT4	NM_006430	11	2	1
SAPS3	NM_018312	20	19	1
WDR59	NM_030581	24	23	1
ANKRD44	NM_153697	19	18	7
ATXN10	NM_013236	5	1	13
SAMHD1	NM_015474	6	5	1
ZNF783	NR_015357	3	1	2
CTDSPL2	NM_016396	10	6	1
BDP1	NM_018429	34	31	1
HABP4	NM_014282	1	1	3
CHAF1B	NM_005441	10	7	2
RSF1	NM_016578	7	5	1
XPO1	NM_003400	10	7	2
GANC	NM_198141	3	3	1
HOOK3	NM_032410	8	6	1
XPO6	NM_015171	7	6	1
LNX2	NM_153371	1	1	1
TMEM59	NM_004872	5	3	2
WAPAL	NM_015045	13	10	2
GNAI3	NM_006496	3	3	1
SSH2	NM_033389	12	11	1
TBC1D22A	NM_014346	3	1	1
ETV6	NM_001987	4	2	1
MARCH6	NM_005885	21	20	2
ZDHHC17	NM_015336	15	12	1
HECTD1	NM_015382	25	22	10
LMTK2	NM_014916	4	1	1
RHOBTB3	NM_014899	6	5	402
FAF1	NM_007051	17	8	1
KDM5B	NM_006618	3	2	2
PLOD3	NM_001084	3	2	1
USP28	NM_020886	8	1	1
SGPL1	NM_003901	10	7	1
MBOAT2	NM_138799	3	1	1
TBC1D4	NM_014832	9	4	1
BARD1	NM_000465	8	4	2
GANC	NM_198141	14	3	1
TM9SF4	NM_014742	6	3	1
DDI2	NM_032341	7	4	2
HAUS4	NM_017815	5	2	17
CBLB	NM_170662	17	14	1
NRXN3	NM_004796	11	7	5
TMEM14B	NM_030969	4	1	1
CRLF3	NM_015986	1	1	4
FTO	NM_001080432	5	4	1
IL2RG	NM_000206	3	1	1
PREX1	NM_020820	8	7	5
STK10	NM_005990	12	10	1
RSPRY1	NM_133368	9	1	1
BIRC6	NM_016252	16	15	1
TYMS	NM_001071	5	2	1
PARP12	NM_022750	7	1	1
TBC1D8	NM_001102426	4	2	6
C5orf42	NM_023073	35	34	1
SLC4A1	NM_000342	2	2	1
YLPM1	NM_019589	15	11	1
ATRNL1	NM_207303	18	1	1
UTRN	NM_007124	39	34	1
KIF5B	NM_004521	23	19	2
KIAA0907	NM_014949	6	4	1
NCKAP1L	NM_005337	12	7	1
SACS	NM_014363	8	3	1
CENPK	NM_022145	8	4	1
SAFB2	NM_014649	12	8	1
PPP2R3C	NM_017917	3	2	1
DOCK2	NM_004946	33	32	1
ARFGEF2	NM_006420	15	13	1
AASDH	NM_181806	10	1	1
PPP1R13B	NM_015316	8	1	1
SSX2IP	NM_014021	5	1	1
CXorf15	NM_018360	2	1	2
FAM102B	NM_001010883	9	6	1
PFTK1	NM_012395	12	1	1
DUSP6	NM_001946	1	1	1
MYO10	NM_012334	10	9	1
SEC63	NM_007214	5	2	1
TXK	NM_003328	4	1	3
DOCK8	NM_203447	20	8	1
HEXDC	NM_173620	3	2	1
HTT	NM_002111	39	37	1
TAOK1	NM_020791	14	7	1
PAF1	NM_019088	12	12	1
OXCT1	NM_000436	15	13	1
IKBKAP	NM_003640	24	6	1
KIAA1618	NM_020954	13	12	1
NEIL3	NM_018248	7	7	2
SUFU	NM_016169	6	3	1
DDB1	NM_001923	9	7	1
RANBP9	NM_005493	11	3	1
ESYT2	NM_020728	19	14	1
SMARCC1	NM_003074	15	13	1
DCAF17	NM_025000	9	3	1
LMNB1	NM_005573	5	3	1
CTPS	NM_001905	16	15	6
EDEM3	NM_025191	17	14	3
UBE3C	NM_014671	16	15	1
ZNF430	NM_025189	3	2	3
AHCTF1	NM_015446	22	20	4
PRRC1	NM_130809	6	3	1
SMS	NM_004595	8	1	1
AKAP11	NM_016248	8	1	1
CHD2	NM_001271	25	16	1
NBAS	NM_015909	20	9	1
TMEM39B	NM_018056	7	6	1
MLL3	NM_170606	5	3	41
CLIP4	NM_024692	5	2	1
C14orf45	NM_025057	5	2	1
LMTK2	NM_014916	10	10	1
TMEM106A	NM_145041	6	5	1
TMEM48	NM_018087	5	1	1
HELZ	NM_014877	27	24	1
UBR3	NM_172070	30	20	1
C9orf91	NM_153045	7	5	1
FNBP4	NM_015308	14	13	1
KIF13B	NM_015254	17	14	1
UTRN	NM_007124	21	16	1
CNOT10	NM_015442	12	10	3
YLPM1	NM_019589	8	6	2
ZNF81	NM_007137	4	2	23
MPP6	NM_016447	5	2	22
CLSPN	NM_022111	17	14	1
C2orf67	NM_152519	2	1	3
RPS6KA3	NM_004586	19	10	1
KIAA1797	NM_017794	16	13	8
MTPAP	NM_018109	2	1	1
CPSF2	NM_017437	8	7	2
LOC100132707	NR_024476	6	3	1
ZFAT	NM_020863	14	12	1
REL	NM_002908	3	1	1
HOOK3	NM_032410	2	1	1
LRP5	NM_002335	2	1	1
LOC91316	NR_024448	10	9	4
MGAT5	NM_002410	3	2	1
NMT1	NM_021079	5	4	2
ARFGEF1	NM_006421	13	1	1
HACE1	NM_020771	5	1	2
SSH2	NM_033389	9	6	16
HCLS1	NM_005335	4	4	1
MAP2K4	NM_003010	3	2	1
ZZEF1	NM_015113	34	31	1
PHLPP2	NM_015020	7	5	10
UTRN	NM_007124	31	27	32
WDR51B	NM_172240	9	4	4
KDM3B	NM_016604	15	14	1
BRAP	NM_006768	8	7	3
SBDS	NM_016038	3	1	1
POLR3A	NM_007055	27	24	1
YLPM1	NM_019589	5	2	1
CENPI	NM_006733	4	1	1
SEC23A	NM_006364	14	13	1
MGA	NM_001080541	8	2	1
ZNF253	NM_021047	2	1	6
APOOL	NM_198450	7	5	1
SENP2	NM_021627	14	11	4
CCDC91	NM_018318	6	2	4
CAPZA1	NM_006135	7	3	7
RHOBTB3	NM_014899	9	3	1
ITGA4	NM_000885	9	6	2
PIAS1	NM_016166	10	9	4
PKN2	NM_006256	11	7	2
RANBP2	NM_006267	22	20	2
RSF1	NM_016578	14	5	1
NUP54	NM_017426	3	1	1
SRBD1	NM_018079	18	16	1
CCDC47	NM_020198	3	1	9
PLCG2	NM_002661	16	12	116
PPM1D	NM_003620	3	1	1
CHAF1B	NM_005441	6	4	1
CORO1C	NM_014325	7	3	1
LRBA	NM_006726	29	24	1
NUFIP1	NM_012345	7	1	1
TMEM156	NM_024943	2	2	1
TRIO	NM_007118	33	11	1
APBB1IP	NM_019043	5	4	1
GCN1L1	NM_006836	30	28	5
RLTPR	NM_001013838	13	0	1
ZNF561	NM_152289	4	2	1
STAT5B	NM_012448	15	1	1
MYH10	NM_005964	24	22	1
UBR2	NM_015255	2	1	1
NOP14	NM_003703	5	2	2
EHMT1	NM_024757	17	16	1
HEATR5B	NM_019024	23	18	1
LPGAT1	NM_014873	5	2	5
RBM6	NM_005777	14	11	1
SEC24A	NM_021982	16	9	1
KHDRBS1	NM_006559	6	4	4
AOX2P	NR_001557	8	3	1
ATP9B	NM_198531	4	2	1
NDFIP1	NM_030571	2	1	1
SAPS3	NM_018312	9	6	4
AAK1	NM_014911	15	14	1
PYGL	NM_002863	10	7	1
SLC43A1	NM_003627	12	11	2
ZBTB46	NM_025224	2	1	367
ZNF337	NM_015655	3	1	1
NOC2L	NM_015658	3	3	1
PCM1	NM_006197	33	32	1
PHIP	NM_017934	6	4	13
TTF1	NM_007344	6	2	1
DDX60L	NM_001012967	28	5	1
PTPLA	NM_014241	5	1	1
GAK	NM_005255	18	11	1
SNX25	NM_031953	4	2	1
ZMYM4	NM_005095	14	7	10
C17orf57	NM_152347	22	17	32
CLNS1A	NM_001293	4	2	1
ICOSLG	NM_015259	4	1	1
MCCC1	NM_020166	12	10	1
RABGEF1	NM_014504	7	5	1
UHMK1	NM_175866	2	1	1
BMPR2	NM_001204	11	11	5
FAM188B	NM_032222	10	9	1
FNBP1	NM_015033	15	11	2
ANKIB1	NM_019004	10	5	1
LRBA	NM_006726	30	25	1
CLEC16A	NM_015226	9	5	2
HEATR2	NM_017802	5	4	1
DDX6	NM_004397	1	1	9
BARD1	NM_000465	3	2	1
C5orf41	NM_153607	7	4	5
NBAS	NM_015909	24	12	1
TNFRSF21	NM_014452	2	1	69
ZNF148	NM_021964	3	1	11
GABPB2	NM_144618	6	4	1
ZC3H12C	NM_033390	1	1	1
CSE1L	NM_001316	23	21	7
MIB1	NM_020774	8	1	1
MLL3	NM_170606	5	1	2
SENP1	NM_014554	3	2	1
DNTTIP2	NM_014597	1	1	1
RRP15	NM_016052	3	1	1
SFMBT2	NM_001029880	6	4	63
IQGAP1	NM_003870	34	31	13
RALB	NM_002881	3	1	8
CERCAM	NM_016174	10	9	1
GLYR1	NM_032569	9	5	1
ZC3H13	NM_015070	7	4	1
CCDC138	NM_144978	12	11	1
C3orf63	NM_001112736	4	1	1
AP4B1	NM_006594	4	4	1
POLR1A	NM_015425	2	1	1
EIF2C2	NM_012154	2	1	4
PIP5K1C	NM_012398	4	3	1
WDR59	NM_030581	7	3	2
LOC728661	NM_001110781	7	1	1
ATF6	NM_007348	8	7	1
DENND3	NM_014957	19	17	1
IDH2	NM_002168	4	1	1
CHSY1	NM_014918	1	1	83
TRRAP	NM_003496	23	23	1
PARG	NM_003631	15	10	1
BIN2	NM_016293	6	5	1
AP2A2	NM_012305	3	1	1
BRWD3	NM_153252	5	4	4
DEPDC6	NM_022783	7	4	1
FAM114A2	NM_018691	4	1	9
KHDRBS1	NM_006559	6	1	1
CBARA1	NM_006077	3	1	2
DDX21	NM_004728	5	3	1
NOLC1	NM_004741	4	1	11
FNBP4	NM_015308	4	2	1
SGMS1	NM_147156	5	1	3
C18orf8	NM_013326	8	7	1
STXBP3	NM_007269	17	14	1
CHD8	NM_020920	19	16	1
TMOD3	NM_014547	8	5	7
LRPPRC	NM_133259	11	6	1
MCM3AP	NM_003906	6	4	20
SFMBT2	NM_001029880	6	1	5
EHMT1	NM_024757	24	19	1
IFI16	NM_005531	7	7	100
VAPB	NM_004738	4	3	23
KIAA1370	NM_019600	9	7	2
STK39	NM_013233	7	1	12
ZCCHC17	NM_016505	6	3	22
MAN1A2	NM_006699	2	1	3
GABPB2	NM_144618	6	1	1
PRPF3	NM_004698	6	6	1
CCDC14	NM_022757	10	4	6
PTPN4	NM_002830	25	12	1
SCLT1	NM_144643	17	5	4
AHCTF1	NM_015446	22	11	1
BAT2D1	NM_015172	24	22	2
EPCAM	NM_002354	2	1	1
RFWD3	NM_018124	1	1	3
AFF4	NM_014423	17	10	1
COX5A	NM_004255	2	1	5
VPS33A	NM_022916	3	1	1
ZER1	NM_006336	7	1	1
APLF	NM_173545	6	1	1
HERC1	NM_003922	29	21	1
ALMS1	NM_015120	8	7	1
VEZT	NM_017599	10	8	1
KIAA0319L	NM_024874	5	3	1
LARP4B	NM_015155	6	4	1
TGS1	NM_024831	6	1	1
PSME4	NM_014614	36	28	1
KDM4B	NM_015015	8	5	5
CLSPN	NM_022111	13	12	2
WWC3	NM_015691	4	1	1
KIAA0368	NM_001080398	8	4	1
PARG	NM_003631	6	1	15
TM9SF3	NM_020123	8	1	4
RPA1	NM_002945	4	1	11
RAD21	NM_006265	7	1	1
UBA2	NM_005499	9	7	1
ADAM10	NM_001110	13	5	1
MSH3	NM_002439	18	7	1
DOPEY2	NM_005128	20	19	3
MLLT3	NM_004529	4	2	1
SWAP70	NM_015055	6	2	1
BIRC6	NM_016252	22	15	9
PTGES3	NM_006601	5	1	2
SEC61A1	NM_013336	6	5	1
DHX34	NM_014681	5	5	5
CHD2	NM_001271	15	13	2
SKA3	NM_145061	6	1	1
ATP8B4	NM_024837	8	3	1
XPO6	NM_015171	5	4	1
DYNC1H1	NM_001376	42	41	2
MAN2A1	NM_002372	7	5	1
KIF5B	NM_004521	10	6	1
CDKAL1	NM_017774	9	7	1
CLASP2	NM_015097	5	1	7
PDK1	NM_002610	7	1	2
INO80	NM_017553	6	5	1
DOCK11	NM_144658	3	1	5
CLUAP1	NM_015041	3	1	1
NCOR1	NM_006311	29	27	1
ST3GAL4	NM_006278	8	1	1
CREBL2	NM_001310	1	1	7
ZNF91	NM_003430	1	1	1
KIF3A	NM_007054	8	5	1
TMEM59	NM_004872	5	1	1
DNA2	NM_001080449	4	1	14
CLNS1A	NM_001293	4	1	1
MARCH6	NM_005885	21	16	1
EML2	NM_012155	17	16	2
PHRF1	NM_020901	2	1	1
RANBP9	NM_005493	11	2	2
NUP214	NM_005085	20	19	2
CASC3	NM_007359	5	3	1
NUP214	NM_005085	17	11	1
DNAJC6	NM_014787	4	1	1
INTS10	NM_018142	10	4	1
PRIM2	NM_000947	9	8	1
ADAMTS17	NM_139057	11	8	1
MIB1	NM_020774	9	1	2
BARD1	NM_000465	3	1	4
FAT1	NM_005245	1	1	1
MPHOSPH9	NM_022782	6	3	1
SMYD3	NM_022743	9	8	1
HERPUD2	NM_022373	4	2	7
RAPGEF6	NM_016340	10	5	2
VPRBP	NM_014703	16	14	2
CEP192	NM_032142	39	1	1
DNAJC13	NM_015268	23	20	1
INTS10	NM_018142	12	4	1
KLHDC1	NM_172193	9	1	1
METAP1	NM_015143	6	1	3
EIF2S2	NM_003908	5	3	2
XPO6	NM_015171	13	11	1
KIAA0195	NM_014738	8	6	1
SLC20A2	NM_006749	1	1	1
USP34	NM_014709	9	3	1
USP34	NM_014709	28	27	1
YTHDC2	NM_022828	6	4	2
DMXL1	NM_005509	18	18	1
TMCC2	NM_014858	3	3	1
ATP9B	NM_198531	4	1	5
BACH2	NM_021813	3	1	5
GAK	NM_005255	10	4	3
KLHL3	NM_017415	13	12	1
SDCCAG8	NM_006642	12	6	1
SLC25A21	NM_030631	6	3	1
TRPM7	NM_017672	5	3	1
ARAP3	NM_022481	9	8	1
WDR66	NM_144668	16	7	1
DAGLB	NM_139179	6	4	1
TFCP2	NM_005653	7	1	1
GNB1	NM_002074	9	8	1
SORL1	NM_003105	11	8	1
SHQ1	NM_018130	9	6	1
SNX25	NM_031953	4	1	4
PBX4	NM_025245	5	1	1
SMC1A	NM_006306	14	13	33
NUP160	NM_015231	6	4	1
DENND5A	NM_015213	18	18	1
TRAF2	NM_021138	8	7	1
ARHGEF9	NM_015185	7	4	1
ATP9A	NM_006045	10	7	1
SMG1	NM_015092	41	36	1
ACAT1	NM_000019	3	1	2
LASS5	NM_147190	8	4	1
CSNK1G1	NM_022048	9	6	1
PPM1D	NM_003620	3	2	1
MARCH7	NM_022826	7	1	1
POLR2A	NM_000937	18	8	1
ZZEF1	NM_015113	28	28	2
SCLT1	NM_144643	13	5	2
CHD2	NM_001271	35	35	1
CARD8	NM_014959	6	1	2
CNTLN	NM_017738	14	13	1
GLS	NM_014905	9	3	9
ST13	NM_003932	7	2	1
ATP13A3	NM_024524	4	1	8
SRPK1	NM_003137	12	10	1
RAB2A	NM_002865	4	3	1
LEO1	NM_138792	6	5	1
ZNF236	NM_007345	8	1	21
ARL8B	NM_018184	3	2	1
NEK4	NM_003157	14	13	2
RBM5	NM_005778	19	17	5
TBCD	NM_005993	18	13	1
ZNRF3	NM_032173	7	2	1
FAM82B	NM_016033	3	1	1
XPO5	NM_020750	19	17	1
ZC3H13	NM_015070	8	4	1
MYO1F	NM_012335	7	4	1
WDFY3	NM_014991	17	8	1
DOCK11	NM_144658	34	30	2
PCNT	NM_006031	13	13	1
SGPL1	NM_003901	8	5	1
ILKAP	NM_030768	8	1	12
MGA	NM_001080541	8	1	3
BAZ1B	NM_032408	8	7	1
CCDC91	NM_018318	4	2	15
USP34	NM_014709	71	68	1
BLMH	NM_000386	10	7	3
DMXL1	NM_005509	27	19	1
RHBDD1	NM_032276	2	1	7
SSH2	NM_033389	5	2	6
KDSR	NM_002035	5	1	1
KDM3B	NM_016604	10	9	1
NOL11	NM_015462	15	9	4
CDKAL1	NM_017774	8	7	1
ERI3	NM_024066	2	2	1
ITCH	NM_031483	15	8	1
USP32	NM_032582	6	5	1
PRMT10	NM_138364	8	2	1
MAN2A1	NM_002372	18	17	1
FBXW4	NM_022039	3	1	10
SUZ12	NM_015355	9	9	3
CTPS	NM_001905	16	8	1
SKA3	NM_145061	4	1	6
CRLF3	NM_015986	6	4	1
ANKRD28	NM_015199	7	3	1
HERC1	NM_003922	23	21	1
CEP110	NM_007018	33	30	30
ERCC6	NM_000124	7	5	1
MTMR8	NM_017677	11	1	1
DOCK1	NM_001380	9	1	2
PRR12	NM_020719	4	4	1
SRCAP	NM_006662	29	27	2
CNOT10	NM_015442	6	3	1
TM9SF2	NM_004800	9	6	1
ANLN	NM_018685	6	3	2
ATP13A3	NM_024524	8	5	2
CHAF1B	NM_005441	6	2	2
MANBA	NM_005908	13	11	2
SUZ12	NM_015355	7	3	4
FAM53B	NM_014661	1	1	4
SUZ12	NM_015355	3	1	2
C10orf76	NM_024541	5	1	1
UXS1	NM_025076	3	1	5
ARFGEF1	NM_006421	18	1	1
TGS1	NM_024831	6	2	1
NCOA2	NM_006540	14	12	1
UHRF2	NM_152896	2	1	17
GMFG	NM_004877	5	4	4
NEK4	NM_003157	13	10	1
EP300	NM_001429	9	8	1
SUCLA2	NM_003850	3	1	1
MYSM1	NM_001085487	11	6	1
UBAP2	NM_018449	12	10	44
OBFC1	NM_024928	5	1	1
ZC3H7A	NM_014153	14	12	1
VEGFC	NM_005429	3	1	1
CPEB4	NM_030627	8	4	1
NAP1L4	NM_005969	6	1	12
FAM116A	NM_152678	7	1	2
PIKFYVE	NM_015040	22	12	1
KPNB1	NM_002265	14	6	3
DDX50	NM_024045	6	4	1
ITPR2	NM_002223	36	19	3
ZC3H13	NM_015070	8	1	1
CUL5	NM_003478	6	2	5
EIF2C4	NM_017629	12	1	6
BTAF1	NM_003972	5	3	1
LOC202181	NR_026921	3	1	1
CUL3	NM_003590	12	3	1
GPATCH1	NM_018025	8	5	1
MAN2A1	NM_002372	4	1	1
C2orf29	NM_017546	3	1	3
ELMO1	NM_014800	13	13	1
ZFP2	NM_030613	2	1	1
NUP107	NM_020401	21	11	3
USP25	NM_013396	4	1	2
WHSC1L1	NM_023034	16	14	7
ATP10A	NM_024490	15	14	1
ZNF512	NM_032434	6	3	1
GFPT1	NM_002056	13	10	1
MAP3K1	NM_005921	5	3	163
ATAD2B	NM_017552	6	4	1
GABPB2	NM_144618	6	2	1
ESPL1	NM_012291	23	23	1
FMNL2	NM_052905	8	6	1
TM7SF3	NM_016551	3	2	4
ZNF687	NM_020832	6	1	1
AATF	NM_012138	7	5	2
TMEM128	NM_032927	3	1	1
ATXN10	NM_013236	8	6	48
FSCN1	NM_003088	2	2	1
SLC11A2	NM_000617	2	1	1
PSME4	NM_014614	19	11	1
SRBD1	NM_018079	13	9	19
CHD9	NM_025134	23	18	1
LONP1	NM_004793	3	2	1
HERC1	NM_003922	15	5	1
LUC7L2	NM_016019	6	3	1
NBAS	NM_015909	20	12	1
SETD2	NM_014159	10	6	2
ITGB3BP	NM_014288	3	1	1
ZER1	NM_006336	11	8	7
CROCCL1	NR_026752	4	4	1
RNF4	NM_002938	3	1	1
WDR59	NM_030581	3	2	1
BRIP1	NM_032043	9	7	1
PKD2	NM_000297	4	2	1
KIAA1632	NM_020964	30	27	1
VPS35	NM_018206	12	6	1
DAGLB	NM_139179	4	2	4
SRPK1	NM_003137	6	2	1
LRBA	NM_006726	40	37	1
NUP107	NM_020401	13	12	1
SEC24A	NM_021982	14	13	1
EIF2S3	NM_001415	9	6	3
PPP1R13B	NM_015316	3	1	1
PEX5L	NM_016559	6	2	1
SETD5	NM_001080517	12	10	1
G2E3	NM_017769	9	6	1
XPO5	NM_020750	12	6	1
KPNA5	NM_002269	11	2	1
AAAS	NM_015665	11	1	1
CNTLN	NM_017738	17	7	1
APPL1	NM_012096	11	8	1
CHD9	NM_025134	21	17	1
UBR5	NM_015902	48	35	20
CAMSAP1	NM_015447	2	1	388
CEP192	NM_032142	18	1	1
OVCH2	NM_198185	9	3	1
SHMT2	NM_005412	2	2	1
ANAPC1	NM_022662	8	8	1
CWF19L2	NM_152434	11	10	1
TPST1	NM_003596	2	2	1
BMPR2	NM_001204	2	1	9
XPO5	NM_020750	10	6	1
WDR60	NM_018051	14	11	2
NBAS	NM_015909	50	47	1
NSUN6	NM_182543	6	3	1
PRKRIP1	NM_024653	3	2	3
SETD2	NM_014159	14	12	1
KDM5B	NM_006618	7	3	1
KDM5B	NM_006618	3	1	1
PPP1R13B	NM_015316	6	5	1
EIF2C4	NM_017629	12	3	1
NEK4	NM_003157	4	2	1
ARAP2	NM_015230	1	1	2
SERPINB1	NM_030666	5	4	1
AFG3L2	NM_006796	7	1	1
SP140L	NM_138402	4	2	2
SWAP70	NM_015055	6	3	1
SETD2	NM_014159	8	3	1
SFXN4	NM_213649	12	7	1
ZMYM4	NM_005095	22	15	1
PARP4	NM_006437	14	12	1
RBM4	NM_002896	2	1	1
RUVBL1	NM_003707	8	7	1
PHRF1	NM_020901	11	4	1
FNTA	NM_002027	2	1	1
MTR	NM_000254	28	1	1
MED13	NM_005121	22	21	1
ATG3	NM_022488	4	3	2
EP300	NM_001429	10	2	1
LPIN2	NM_014646	3	1	1
NEIL3	NM_018248	8	7	49
QRICH2	NM_032134	6	1	4
GATAD2A	NM_017660	3	2	6
ZCCHC6	NM_024617	8	2	1
ZC3HC1	NM_016478	2	1	1
NUP43	NM_198887	4	3	2
RIC8A	NM_021932	4	4	2
RARS	NM_002887	5	1	1
STK38	NM_007271	6	1	1
RAB7A	NM_004637	4	1	2
ZFR	NM_016107	9	6	5
ZNF569	NM_152484	4	3	1
CAMSAP1L1	NM_203459	3	1	4
GGNBP2	NM_024835	8	6	1
KLHDC1	NM_172193	3	1	1
CEP192	NM_032142	10	1	118
EXOC5	NM_006544	11	1	1
SIDT2	NM_001040455	5	1	1
ZFP106	NM_022473	10	3	1
CHAF1B	NM_005441	4	3	3
PIKFYVE	NM_015040	34	23	1
NOP14	NM_003703	7	6	1
ARHGEF9	NM_015185	3	1	1
DDI2	NM_032341	7	2	2
MPP6	NM_016447	11	2	22
SUZ12	NM_015355	7	1	1
ZC3H13	NM_015070	10	8	1
DAGLB	NM_139179	6	3	1
FAF1	NM_007051	7	4	1
SH2D3C	NM_170600	1	1	5
C10orf28	NM_014472	3	1	1
MYSM1	NM_001085487	11	8	1
DOCK8	NM_203447	29	27	1
RABGAP1L	NM_014857	2	1	1
ATF7IP	NM_018179	4	1	1
CLEC16A	NM_015226	11	10	1
CPSF6	NM_007007	8	1	8
PKD2	NM_000297	6	3	1
BTAF1	NM_003972	13	4	1
MYO18B	NM_032608	42	42	1
OMA1	NM_145243	6	2	1
BIRC6	NM_016252	56	51	1
PGS1	NM_024419	4	1	6
TTC17	NM_018259	20	5	1
KPNB1	NM_002265	9	6	53
PANK3	NM_024594	4	2	3
CD2	NM_001767	3	2	1
MYBL2	NM_002466	6	4	1
INO80	NM_017553	19	17	1
IPO9	NM_018085	12	6	1
RRP1B	NM_015056	12	11	1
AP4M1	NM_004722	3	2	1
SAPS3	NM_018312	13	2	1
MLL3	NM_170606	2	1	4
SEC24A	NM_021982	6	4	1
SNX2	NM_003100	6	2	2
DDX58	NM_014314	15	11	1
TIMELESS	NM_003920	8	6	1
AHCTF1	NM_015446	2	0	1
KIAA0146	NM_001080394	4	2	4
CHD4	NM_001273	32	30	2
GTPBP4	NM_012341	6	5	1
BLK	NM_001715	10	2	1
TALDO1	NM_006755	3	1	2
GNPTAB	NM_024312	17	7	2
WDR44	NM_019045	6	3	1
GNS	NM_002076	7	4	1
USP32	NM_032582	3	1	1
SRPK1	NM_003137	11	10	3
FBXW7	NM_033632	1	1	1
CARS2	NM_024537	6	1	1
ARFGEF1	NM_006421	18	14	32
NUP54	NM_017426	8	1	1
XPO5	NM_020750	8	1	1
ITGAX	NM_000887	11	9	7
SDCCAG1	NM_004713	23	16	1
CPEB3	NM_014912	8	7	3
RGL1	NM_015149	16	5	1
AGTPBP1	NM_015239	22	17	1
METAP2	NM_006838	6	3	1
NUP210	NM_024923	10	6	1
PHLPP2	NM_015020	16	14	1
SENP2	NM_021627	8	2	1
PPP3CC	NM_005605	5	3	1
C20orf117	NM_199181	10	8	1
FAM91A1	NM_144963	14	11	1
MLL3	NM_170606	37	37	1
MAN1A2	NM_006699	5	1	135
RNF149	NM_173647	5	1	36
TMEM165	NM_018475	4	1	1
MED13	NM_005121	27	22	1
EEA1	NM_003566	8	6	1
DUSP16	NM_030640	3	1	1
EIF4B	NM_001417	7	7	2
INTS8	NM_017864	6	1	2
PARP14	NM_017554	7	3	1
FOXK2	NM_004514	3	1	1
STAT5B	NM_012448	12	9	2
FAF1	NM_007051	13	8	2
ZNF346	NM_012279	4	1	25
CEP350	NM_014810	16	14	1
GOLGA5	NM_005113	6	4	2
MAP3K5	NM_005923	7	3	1
VDAC2	NM_003375	7	4	2
MAP2K4	NM_003010	3	1	12
TYW1	NM_018264	10	9	1
RNF40	NM_014771	18	1	1
IPO9	NM_018085	22	19	1
PAX5	NM_016734	5	1	13
TBC1D22A	NM_014346	10	8	1
C12orf24	NM_013300	5	2	5
SRP72	NM_006947	15	8	1
DCAF17	NM_025000	8	3	5
DDX60L	NM_001012967	23	20	1
FOXJ3	NM_014947	4	2	1
OSBPL11	NM_022776	7	1	1
UBE2F	NM_080678	6	5	7
GTF2F2	NM_004128	4	3	1
AFF4	NM_014423	7	5	1
MAST4	NM_198828	2	1	1
SLC39A9	NM_018375	5	3	1
ARHGAP10	NM_024605	17	13	1
PDS5B	NM_015032	30	28	2
TAOK1	NM_020791	16	15	2
SGMS1	NM_147156	2	1	1
SCLT1	NM_144643	15	5	1
RC3H1	NM_172071	4	1	1
MTF2	NM_007358	4	1	1
CORO7	NM_024535	5	1	2
HSPA4	NM_002154	6	1	1
C7orf42	NM_017994	4	1	1
DHTKD1	NM_018706	14	3	1
ERCC6	NM_000124	19	5	1
TTBK2	NM_173500	8	6	1
MED13	NM_005121	14	12	10
MARK4	NM_031417	9	8	4
PLXNC1	NM_005761	8	5	18
KLHL24	NM_017644	4	1	4
LRP6	NM_002336	11	7	2
SNX13	NM_015132	11	9	1
TRRAP	NM_003496	50	44	1
C10orf76	NM_024541	4	1	1
TMEM48	NM_018087	13	11	1
RABGAP1L	NM_014857	16	2	1
CTNNBL1	NM_030877	6	5	1
C11orf84	NM_138471	4	1	1
NUFIP2	NM_020772	1	1	10
R3HDM1	NM_015361	19	18	1
ATXN10	NM_013236	6	3	6
MELK	NM_014791	10	5	2
CHD6	NM_032221	4	2	1
FTO	NM_001080432	6	3	1
IKBKB	NM_001556	20	19	20
TTC33	NM_012382	3	2	1
ZBTB8OS	NM_178547	4	1	3
USP36	NM_025090	9	4	1
LIMK1	NM_002314	3	2	1
NEK10	NM_199347	22	2	1
ROCK1	NM_005406	31	29	1
OFD1	NM_003611	8	5	2
NDUFB2	NM_004546	2	1	2
DDX50	NM_024045	6	3	1
PRR12	NM_020719	5	4	1
SUSD1	NM_022486	11	10	4
BLMH	NM_000386	10	4	4
TAOK1	NM_020791	7	2	2
XPO1	NM_003400	22	16	1
DHTKD1	NM_018706	14	14	1
BTBD7	NM_001002860	4	1	1
ETV6	NM_001987	4	4	14
SMARCC1	NM_003074	6	5	1
TIAM1	NM_003253	26	4	1
GMPS	NM_003875	8	7	1
RSF1	NM_016578	13	7	3
VAV1	NM_005428	5	1	2
GALNT7	NM_017423	1	1	16
NDUFS1	NM_005006	13	2	1
ZFC3H1	NM_144982	8	6	1
KIF18B	NM_001080443	6	1	1
SPTLC2	NM_004863	4	3	1
PIK3CA	NM_006218	13	1	1
TRIP12	NM_004238	24	18	1
ZC3HAV1	NM_020119	11	10	1
RMND1	NM_017909	1	1	1
TOP2B	NM_001068	27	27	1
INO80	NM_017553	31	29	3
APBB1IP	NM_019043	10	4	1
PTGES3	NM_006601	4	2	1
GMFG	NM_004877	5	3	5
SHQ1	NM_018130	5	1	1
TTC28	NM_001145418	5	5	4
FLT3	NM_004119	9	5	66
YTHDC2	NM_022828	18	14	1
N6AMT2	NM_174928	3	2	1
RAPGEF5	NM_012294	4	1	1
DHTKD1	NM_018706	9	1	2
B4GALT6	NM_004775	4	1	22
HSPA4	NM_002154	15	12	1
PSTPIP2	NM_024430	12	3	1
SPPL3	NM_139015	5	1	1
USP12	NM_182488	5	1	2
EIF3A	NM_003750	19	19	1
XPO4	NM_022459	8	3	4
HCFC2	NM_013320	12	3	1
SNRNP70	NM_003089	2	2	5
USP48	NM_032236	13	12	2
BIRC6	NM_016252	44	41	3
NR2C2	NM_003298	9	1	1
SECISBP2L	NM_014701	11	6	1
SETX	NM_015046	23	19	1
TIAM2	NM_012454	2	2	1
IGF1R	NM_000875	1	1	50
UHRF2	NM_152896	5	2	1
EXTL3	NM_001440	2	1	1
ARAP2	NM_015230	14	6	1
DDX1	NM_004939	12	7	2
FAM82A2	NM_018145	5	4	8
FKBP8	NM_012181	3	2	7
STK38	NM_007271	6	4	1
ZNF608	NM_020747	1	1	119
FLT3	NM_004119	21	20	1
RIC8B	NM_018157	5	4	1
CDKAL1	NM_017774	8	1	2
CHD6	NM_032221	15	2	1
HAUS6	NM_017645	5	4	2
CLEC16A	NM_015226	17	10	21
TGS1	NM_024831	5	1	1
PUS10	NM_144709	10	4	1
ARFGEF2	NM_006420	13	8	1
PHC3	NM_024947	8	7	1
SELI	NM_033505	4	1	6
ZMYM4	NM_005095	8	7	8
SPG7	NM_003119	12	9	1
USP37	NM_020935	16	2	2
ZNF738	NR_027130	3	2	1
EP400	NM_015409	14	12	1
PIKFYVE	NM_015040	16	12	2
UBE2CBP	NM_198920	8	3	2
C22orf30	NM_173566	7	2	1
REXO4	NM_020385	5	1	2
ST13	NM_003932	3	2	2
DENND3	NM_014957	12	5	63
PDAP1	NM_014891	2	1	3
SBF1	NM_002972	8	8	1
TERF2	NM_005652	5	3	2
BRAP	NM_006768	8	5	1
RPRD1B	NM_021215	5	3	10
STX6	NM_005819	6	3	18
DHTKD1	NM_018706	15	1	2
BAZ1B	NM_032408	11	9	2
KHDRBS1	NM_006559	3	1	2
KCTD20	NM_173562	2	1	1
LRP11	NM_032832	5	1	1
RBM16	NM_014892	5	1	18
EIF4ENIF1	NM_019843	5	4	2
AKAP10	NM_007202	9	2	2
SFXN2	NM_178858	8	3	1
SIAE	NM_170601	6	5	1
ZEB2	NM_014795	3	2	1
ATP7A	NM_000052	8	6	1
BCL3	NM_005178	7	3	1
TEP1	NM_007110	6	2	1
ATR	NM_001184	15	1	1
CHMP4A	NM_014169	4	1	7
CENPF	NM_016343	13	12	1
SFRS2IP	NM_004719	10	10	2
DCTN2	NM_006400	6	5	1
UBE2G1	NM_003342	4	2	16
KIAA0101	NM_014736	2	2	2
RFC1	NM_002913	20	15	1
SUCLG2	NM_003848	8	2	1
AVL9	NM_015060	6	2	1
MYO18B	NM_032608	36	31	6
PREX1	NM_020820	9	8	1
STK33	NM_030906	12	4	1
DDB2	NM_000107	2	1	1
ATXN10	NM_013236	8	3	1
AAGAB	NM_024666	4	1	101
INSIG1	NM_005542	4	2	1
NOP58	NM_015934	4	3	1
RNF10	NM_014868	9	1	1
UTRN	NM_007124	49	46	1
CBL	NM_005188	4	2	2
PTPN22	NM_015967	17	16	1
ATP10D	NM_020453	9	5	3
OMA1	NM_145243	7	1	42
PUS7	NM_019042	6	2	1
TAOK1	NM_020791	11	7	1
POLA1	NM_016937	34	26	1
PRKCE	NM_005400	9	6	1
DOPEY1	NM_015018	23	6	1
BARD1	NM_000465	5	3	10
KIAA1632	NM_020964	26	24	1
C9orf102	NM_001010895	1	1	1
ZNF720	NM_001130913	2	1	37
HEATR5B	NM_019024	30	25	1
ICMT	NM_012405	3	3	1
MAP3K12	NM_006301	4	1	1
C2orf86	NM_015910	8	6	1
KIAA1797	NM_017794	20	13	1
SMC1A	NM_006306	15	13	1
USP22	NM_015276	9	7	9
DNAH6	NM_001370	9	5	1
FAM120B	NM_032448	2	1	1
FOXP1	NM_032682	11	9	1
DYNC1H1	NM_001376	63	62	24
FARSB	NM_005687	14	11	1
IARS2	NM_018060	18	11	1
RSF1	NM_016578	14	7	1
KIAA0182	NM_014615	1	1	50
PTPN4	NM_002830	15	12	1
SAFB	NM_002967	12	8	1
SRCAP	NM_006662	26	25	39
C6orf70	NM_018341	9	6	13
EP300	NM_001429	8	2	1
RPS11	NM_001015	2	2	1
TTC17	NM_018259	20	18	2
CPSF6	NM_007007	8	6	1
MAN1A2	NM_006699	3	1	31
INTS8	NM_017864	24	18	2
NUP214	NM_005085	20	17	2
INO80	NM_017553	13	12	1
UTRN	NM_007124	31	29	10
CNOT6L	NM_144571	3	1	2
MAN2A1	NM_002372	3	1	131
CEP192	NM_032142	8	1	57
HNRNPH1	NM_005520	6	3	1
RPA1	NM_002945	11	6	1
SNX27	NM_030918	6	1	1
CHD9	NM_025134	35	17	2
ZBTB44	NM_014155	1	1	267
KIAA1919	NM_153369	2	1	2
SFMBT2	NM_001029880	3	1	311
FSCN1	NM_003088	3	1	1
ARMC8	NM_015396	17	8	1
BUB1	NM_004336	19	9	1
ELP3	NM_018091	9	7	2
NLRC5	NM_032206	2	1	1
PDIA6	NM_005742	6	2	2
INTS10	NM_018142	12	8	1
DDX51	NM_175066	7	7	1
EPS15	NM_001981	11	8	1
FCGBP	NM_003890	4	4	1
HERC2	NM_004667	73	70	3
FAM126A	NM_032581	6	1	22
TTC19	NM_017775	4	4	1
BIRC6	NM_016252	20	15	1
CNTLN	NM_017738	11	8	10
UNK	NM_001080419	13	13	1
NEK1	NM_012224	20	17	1
USP48	NM_032236	19	12	4
IFNGR2	NM_005534	5	2	3
PIP5K1B	NM_003558	5	4	1
PSME4	NM_014614	2	1	1
POLB	NM_002690	10	2	1
LPIN1	NM_145693	15	1	2
PARP4	NM_006437	13	11	1
CHD7	NM_017780	5	3	1
AFG3L2	NM_006796	4	1	1
KPNA5	NM_002269	9	7	2
WAPAL	NM_015045	14	4	3
ATRNL1	NM_207303	7	1	1
C5orf25	NM_198567	5	3	1
NUP160	NM_015231	26	22	1
PASK	NM_015148	2	1	6
STAU2	NM_014393	8	5	1
ACIN1	NM_014977	17	10	1
MGAT4A	NM_012214	1	1	1
MLLT1	NM_005934	3	1	4
CCDC18	NM_206886	9	1	1
MYST4	NM_012330	2	2	4
NPHP3	NM_153240	5	3	1
POLD1	NM_002691	10	9	8
HUWE1	NM_031407	22	19	1
SHOC2	NM_007373	1	1	1
IPO8	NM_006390	7	6	1
CDC2L6	NM_015076	6	2	1
FAM188A	NM_024948	9	5	1
GARS	NM_002047	11	10	1
GLYR1	NM_032569	9	3	1
ME2	NM_002396	11	1	1
PRKCH	NM_006255	8	2	1
DNAJA1	NM_001539	6	2	2
PRSS7	NM_002772	17	10	2
USP32	NM_032582	25	21	1
ZKSCAN1	NM_003439	2	1	1109
FAM179B	NM_015091	8	6	1
NAV1	NM_020443	27	27	2
IQGAP1	NM_003870	34	30	1
RLF	NM_012421	4	1	2
INO80	NM_017553	17	16	3
PHF20L1	NM_016018	19	15	4
SBNO1	NM_018183	11	6	1
YTHDF3	NM_152758	3	2	1
UTRN	NM_007124	37	34	1
PGM2	NM_018290	11	7	1
DYM	NM_017653	7	3	8
FOXP1	NM_032682	11	7	2
LARS	NM_020117	4	2	1
DCUN1D2	NM_001014283	3	1	1
ZUFSP	NM_145062	7	2	1
CLUAP1	NM_015041	4	2	1
SSBP2	NM_012446	13	12	2
UBAP2	NM_018449	9	3	1
MSH3	NM_002439	18	15	1
RSF1	NM_016578	6	5	5
TRIP12	NM_004238	2	1	5
SMO	NM_005631	5	2	2
C11orf30	NM_020193	13	9	1
GNB1	NM_002074	9	4	1
SLC12A7	NM_006598	2	1	1
SDCCAG8	NM_006642	11	1	2
XPO1	NM_003400	3	1	39
ANLN	NM_018685	7	2	1
EVI5	NM_005665	8	2	4
AGGF1	NM_018046	6	5	7
BRIP1	NM_032043	12	11	1
DOCK11	NM_144658	39	35	1
MYO1F	NM_012335	11	10	1
DDX10	NM_004398	5	1	6
MARCH6	NM_005885	7	4	4
UBXN2A	NM_181713	5	1	16
DDI2	NM_032341	4	2	1
DOCK11	NM_144658	6	1	1
FAM193A	NM_003704	9	5	1
ELK3	NM_005230	1	1	1
SPSB1	NM_025106	1	1	1
EIF4G3	NM_003760	9	5	1
CEP350	NM_014810	13	6	6
FAM190B	NM_018999	4	3	8
ENO1	NM_001428	8	7	1
FBXW4	NM_022039	4	1	1819
XPO1	NM_003400	19	16	1
ENC1	NM_003633	1	1	1
SORL1	NM_003105	13	11	1
AXIN2	NM_004655	2	1	2
CTNNA1	NM_001903	6	3	2
POLA1	NM_016937	33	17	1
SH3RF1	NM_020870	3	2	4
STIM1	NM_003156	4	1	1
SKA3	NM_145061	3	1	2
WDR52	NM_018338	12	2	1
FLCN	NM_144997	12	8	1
RNF122	NM_024787	1	1	1
ZCCHC17	NM_016505	6	5	2
CEP110	NM_007018	33	22	1
MLL	NM_005933	7	6	1
PAFAH1B2	NM_002572	4	1	12
SARS	NM_006513	5	4	1
WDR92	NM_138458	5	3	1
ALMS1	NM_015120	6	2	1
C16orf62	NM_020314	26	12	1
TNPO3	NM_012470	20	14	1
PCF11	NM_015885	9	2	2
ABCC4	NM_005845	29	23	1
RNF141	NM_016422	4	1	1
AKAP10	NM_007202	7	2	1
USP7	NM_003470	9	6	1
ANKRD26	NM_014915	9	3	1
C11orf54	NM_014039	6	1	1
DOCK8	NM_203447	3	1	3
CHD2	NM_001271	32	28	2
SEC24A	NM_021982	8	4	1
MIER2	NM_017550	6	3	1
FAM120B	NM_032448	8	6	3
CHD9	NM_025134	36	32	1
STAU2	NM_014393	4	1	19
VWCE	NM_152718	12	11	1
C11orf30	NM_020193	6	2	1
DEF6	NM_022047	4	3	2
KIAA1012	NM_014939	11	5	1
KIAA1409	NM_020818	13	13	1
RIC8B	NM_018157	3	1	1
SERINC5	NM_178276	7	6	1
VEZT	NM_017599	4	1	1
ESYT2	NM_020728	17	14	3
KIF15	NM_020242	28	24	1
NOP14	NM_003703	7	4	4
CUL1	NM_003592	20	19	1
MORC3	NM_015358	6	4	1
PDIA6	NM_005742	9	6	3
CRKL	NM_005207	1	1	36
RBM26	NM_022118	5	3	1
SAMD8	NM_144660	1	1	1
TLE1	NM_005077	13	8	1
TMEM49	NM_030938	4	1	59
C2orf42	NM_017880	3	2	14
CIT	NM_007174	4	2	1
CEP350	NM_014810	30	27	1
STRBP	NM_018387	5	2	6
IQGAP2	NM_006633	34	32	1
SEL1L3	NM_015187	1	1	1
C17orf53	NM_024032	7	5	1
MSH3	NM_002439	18	13	2
NLRC3	NM_178844	5	5	1
ZNF827	NM_178835	4	1	5
L3MBTL4	NM_173464	9	1	1
MTR	NM_000254	18	1	1
SSH2	NM_033389	12	6	1
CATSPERG	NM_021185	5	3	1
DCUN1D1	NM_020640	5	2	2
ZFC3H1	NM_144982	21	19	5
AQR	NM_014691	32	31	2
KIAA0528	NM_014802	13	9	1
RABGAP1L	NM_014857	16	13	1
CEP110	NM_007018	36	20	1
GSR	NM_000637	11	4	1
MTMR1	NM_003828	10	9	10
FAM82B	NM_016033	4	1	1
HEXA	NM_000520	12	10	1
M6PR	NM_002355	4	3	1
MARCH7	NM_022826	5	4	2
IQGAP1	NM_003870	14	11	1
BDP1	NM_018429	31	30	1
SKIV2L2	NM_015360	14	7	2
CD3G	NM_000073	3	2	1
BRD1	NM_014577	6	1	1
SHCBP1	NM_024745	7	4	1
ZC3H4	NM_015168	10	9	1
SDCCAG1	NM_004713	9	4	1
NUP54	NM_017426	2	1	6
SBNO1	NM_018183	26	16	1
SCAP	NM_012235	5	3	3
DNAJA2	NM_005880	5	5	2
SELO	NM_031454	1	1	1
TMOD3	NM_014547	8	7	1
TRIP11	NM_004239	15	11	1
BRPF3	NM_015695	7	7	2
RBM5	NM_005778	2	1	1
BCL2L13	NM_015367	5	4	1
DCAF17	NM_025000	10	3	1
R3HDM1	NM_015361	19	5	1
TNKS2	NM_025235	20	18	2
KPNB1	NM_002265	14	7	120
NBAS	NM_015909	47	35	1
HTT	NM_002111	2	1	1
FER	NM_005246	8	5	2
KDM3B	NM_016604	16	15	4
LRIG2	NM_014813	15	2	1
RPH3AL	NM_006987	4	3	1
ZC3H7A	NM_014153	20	6	1
ATF6	NM_007348	13	9	6
EML2	NM_012155	6	6	1
HDAC8	NM_018486	8	6	1
HUWE1	NM_031407	28	23	1
ZNF713	NM_182633	2	1	1
RNMTL1	NM_018146	2	1	1
SMARCC1	NM_003074	23	22	1
ZNF512	NM_032434	9	2	1
ACAP1	NM_014716	9	5	2
AGGF1	NM_018046	10	5	1
USP3	NM_006537	10	1	1
ZCCHC2	NM_017742	4	1	1
HERC1	NM_003922	10	3	2
C11orf30	NM_020193	7	6	31
TRAPPC10	NM_003274	20	19	1
SLC25A30	NM_001010875	6	2	1
ANKRD44	NM_153697	5	4	1
FRMD4B	NM_015123	3	1	1
HISPPD1	NM_015216	15	4	3
RCBTB2	NM_001268	9	1	1
SIRT1	NM_012238	3	1	2
SUPT16H	NM_007192	21	15	1
C3orf31	NM_138807	5	5	1
UBXN2A	NM_181713	5	4	2
CLASP2	NM_015097	11	8	1
LYST	NM_000081	47	45	1
INO80	NM_017553	18	14	1
MAP7D3	NM_024597	17	16	1
SOS2	NM_006939	6	4	1
TFR2	NM_003227	16	3	1
C22orf30	NM_173566	2	1	4
DUS2L	NM_017803	2	1	1
LMBRD2	NM_001007527	5	1	1
KDM4B	NM_015015	14	11	2
UBR2	NM_015255	3	1	1
DNAJC16	NM_015291	4	3	1
FAM102B	NM_001010883	9	2	2
TOP2B	NM_001068	33	26	1
PTPN11	NM_002834	5	1	2
TCFL5	NM_006602	4	2	2
ASB3	NM_016115	2	1	1
CBL	NM_005188	11	9	1
C12orf51	NM_001109662	58	55	1
DYNC1H1	NM_001376	68	62	1
KIF15	NM_020242	15	7	1
TRA2B	NM_004593	5	3	2
TRIM38	NM_006355	3	2	1
ANKS1A	NM_015245	9	1	1
BNIP3L	NM_004331	4	3	1
CAPZB	NM_004930	5	1	1
YTHDF2	NM_016258	3	3	12
KIAA0586	NM_014749	5	2	1
LPP	NM_005578	5	5	1
MTA1	NM_004689	9	6	1
YBX1	NM_004559	6	2	1
TXN2	NM_012473	2	2	1
GBAS	NM_001483	5	4	1
KIAA0020	NM_014878	15	1	1
LRCH3	NM_032773	3	2	2
RAB3D	NM_004283	3	2	1
CEP192	NM_032142	20	1	1
SMARCC1	NM_003074	4	1	4
INTS1	NM_001080453	21	16	1
CTCF	NM_006565	3	2	18
TBC1D1	NM_015173	1	1	1
ATP10D	NM_020453	2	1	1
E2F1	NM_005225	5	2	1
THAP4	NM_015963	4	3	1
MYCBP2	NM_015057	17	16	2
CHD7	NM_017780	13	3	2
MTRF1	NM_004294	4	1	2
RBBP9	NM_006606	3	1	2
WDR66	NM_144668	6	5	1
DNAJC9	NM_015190	3	2	1
AP3B1	NM_003664	21	11	6
DOCK8	NM_203447	24	7	2
PFTK1	NM_012395	8	2	1
PVT1	NR_003367	2	2	13
SMEK1	NM_032560	4	3	1
C3orf23	NM_173826	4	1	1
SLC33A1	NM_004733	3	1	4
AKAP10	NM_007202	8	4	1
MTM1	NM_000252	10	5	1
PIGV	NM_017837	2	2	1
BAZ1B	NM_032408	4	2	1
PCNXL2	NM_014801	20	15	1
TBC1D1	NM_015173	17	11	1
THAP4	NM_015963	1	1	4
SIPA1L2	NM_020808	4	1	2
OIT3	NM_152635	3	2	1
UTP6	NM_018428	12	7	3
BRIP1	NM_032043	13	7	1
SENP5	NM_152699	1	1	1
ZBTB8A	NM_001040441	2	2	2
LOC286467	NR_026975	9	7	1
XPO1	NM_003400	19	1	1
IQGAP1	NM_003870	8	7	3
C9orf3	NM_032823	4	2	3
HDAC4	NM_006037	8	5	1
UBAP2	NM_018449	3	1	5
CENPF	NM_016343	5	2	1
GNAQ	NM_002072	4	1	9
KIAA1618	NM_020954	7	3	1
ZBTB11	NM_014415	6	1	1
RBAK	NM_021163	3	1	1
TRIP12	NM_004238	11	7	1
IBTK	NM_015525	24	16	1
RCSD1	NM_052862	5	3	4
ATP8B4	NM_024837	22	14	1
BARD1	NM_000465	6	2	5
FLT3	NM_004119	21	19	1
DOPEY2	NM_005128	21	19	3
DNA2	NM_001080449	3	1	1
PAN3	NM_175854	11	7	4
SRCAP	NM_006662	3	3	1
WDR27	NM_182552	16	14	1
TAOK1	NM_020791	18	16	1
CLNS1A	NM_001293	3	1	1
RNF138	NM_016271	3	2	20
ZBTB11	NM_014415	2	1	30
POLE2	NM_002692	5	3	2
UQCRC2	NM_003366	11	4	6
WDR59	NM_030581	21	20	1
GABPA	NM_002040	4	1	1
MPND	NM_032868	7	6	1
VPS35	NM_018206	12	7	1
APLF	NM_173545	7	7	1
MED1	NM_004774	12	10	1
C10orf119	NM_024834	12	6	1
C12orf11	NM_018164	7	3	2
PHC3	NM_024947	10	7	1
RBM16	NM_014892	16	9	1
MLL	NM_005933	9	6	1
C14orf145	NM_152446	6	5	1
GTPBP4	NM_012341	9	6	1
STK3	NM_006281	9	6	1
EIF2A	NM_032025	4	3	1
C14orf49	NM_152592	2	1	1
SMG1	NM_015092	40	38	3
ITIH3	NM_002217	20	17	3
C21orf58	NM_058180	4	3	1
DDB1	NM_001923	4	2	3
KIAA1618	NM_020954	6	5	2
BCAT1	NM_005504	8	7	4
RPA1	NM_002945	12	6	1
RBM5	NM_005778	13	12	30
ATP7A	NM_000052	13	10	4
SELI	NM_033505	3	1	1
TTC4	NM_004623	6	3	1
CHD7	NM_017780	1	1	1
SMARCC1	NM_003074	25	21	1
WWOX	NM_016373	7	5	1
BTBD10	NM_032320	5	2	30
DDX18	NM_006773	9	8	1
EIF2S1	NM_004094	6	2	1
RINT1	NM_021930	13	11	1
ROD1	NM_005156	7	2	1
SHANK3	NM_001080420	21	21	1
ABCA13	NM_152701	40	39	1
CYBB	NM_000397	10	6	1
CCT4	NM_006430	9	2	2
XRN2	NM_012255	26	24	1
TXNDC12	NM_015913	4	2	1
BRD1	NM_014577	10	7	2
C20orf117	NM_199181	12	1	1
NOP58	NM_015934	9	6	1
SETD2	NM_014159	15	12	1
CENPO	NM_024322	2	2	1
TIAM1	NM_003253	16	12	1
BNIP3	NM_004052	4	1	1
COPG	NM_016128	14	13	1
NFKB1	NM_003998	9	8	1
RBM33	NM_053043	4	2	232
C14orf145	NM_152446	7	3	14
WDR60	NM_018051	6	4	2
BCORL1	NM_021946	6	6	1
RANBP9	NM_005493	11	5	40
SUSD1	NM_022486	3	3	1
CSRP2	NM_001321	1	1	1
EDEM1	NM_014674	6	5	1
HADH	NM_005327	5	1	1
ZNF292	NM_015021	3	1	5
BTAF1	NM_003972	25	20	3
MAPK6	NM_002748	2	1	1
TNFRSF11A	NM_003839	2	1	1
ZNF277	NM_021994	1	1	11
CCAR1	NM_018237	9	1	1
CHD2	NM_001271	36	36	1
PCMTD1	NM_052937	1	1	38
SDCCAG8	NM_006642	11	7	1
TRPM7	NM_017672	9	1	1
DCAF17	NM_025000	9	5	1
ZNF254	NM_203282	2	1	1
GTPBP4	NM_012341	5	1	1
KLHDC4	NM_017566	6	5	1
SNTB2	NM_006750	2	1	1
ZNFX1	NM_021035	2	2	1
FAM190B	NM_018999	8	5	10
AHCTF1	NM_015446	19	16	1
CCDC21	NM_022778	3	3	1
RAB3GAP1	NM_012233	4	3	2
SETX	NM_015046	4	2	2
SLC30A5	NM_022902	12	3	1
CAPZA1	NM_006135	6	3	11
DUSP22	NM_020185	6	1	1
KDM1B	NM_153042	14	13	1
STAU2	NM_014393	4	3	6
ZNF827	NM_178835	1	1	1
ATP9B	NM_198531	9	4	1
LCOR	NM_032440	6	2	1
PHTF1	NM_006608	9	7	1
MIER2	NM_017550	6	1	1
SLC44A1	NM_080546	12	8	1
CHD9	NM_025134	31	30	1
MLYCD	NM_012213	3	1	5
ZC3H18	NM_144604	7	3	1
DOCK8	NM_203447	20	18	1
MON2	NM_015026	6	1	6
RICS	NM_001142685	4	2	1
AGBL3	NM_178563	15	3	1
ATAD2B	NM_017552	16	15	1
BIN2	NM_016293	9	5	1
IFI30	NM_006332	3	1	7
SLC15A4	NM_145648	1	1	6
SSR1	NM_003144	2	1	1
KIF2C	NM_006845	6	6	1
R3HDM1	NM_015361	21	20	1
LOC375190	NM_001145710	6	2	2
GSR	NM_000637	11	7	1
ITPR2	NM_002223	50	45	1
KLHL24	NM_017644	3	1	2
KIAA1797	NM_017794	29	26	4
ELMO1	NM_014800	14	13	1
KIF24	NM_194313	5	2	1
DDX59	NM_001031725	2	1	1
TMEM48	NM_018087	9	2	1
TMX1	NM_030755	6	1	1
AP3B1	NM_003664	16	11	1
CUL2	NM_003591	18	12	3
MYBL2	NM_002466	8	7	2
WAPAL	NM_015045	7	4	1
ATRNL1	NM_207303	14	1	1
BAZ1B	NM_032408	12	9	1
C5orf25	NM_198567	5	4	2
PREP	NM_002726	9	7	1
B3GALNT2	NM_152490	7	5	1
ZBTB8OS	NM_178547	3	1	1
MLL3	NM_170606	8	3	2
PAK1IP1	NM_017906	6	4	1
SPTA1	NM_003126	43	42	1
ZCCHC7	NM_032226	1	1	4
POLK	NM_016218	4	1	1
TMEM48	NM_018087	8	1	1
PREX1	NM_020820	4	1	3
ZNF362	NM_152493	7	6	5
PFKP	NM_002627	15	14	4
SMARCC1	NM_003074	11	10	1
HECTD1	NM_015382	9	6	1
CEP70	NM_024491	5	3	1
HIBADH	NM_152740	3	1	2
FARS2	NM_006567	3	2	6
MED13L	NM_015335	3	1	1
C14orf49	NM_152592	6	3	1
CALCOCO2	NM_005831	6	2	6
CCDC109B	NM_017918	3	1	1
KIAA1012	NM_014939	27	26	1
SESTD1	NM_178123	10	6	1
KLHL22	NM_032775	5	1	1
POLR3A	NM_007055	16	15	1
RABGAP1	NM_012197	5	4	1
GNAQ	NM_002072	4	3	4
UBA2	NM_005499	5	2	4
LOC286467	NR_026975	9	4	5
RAPGEF6	NM_016340	25	24	1
SPATA13	NM_153023	2	1	1
ACAP2	NM_012287	16	13	1
AIMP2	NM_006303	2	2	2
C7orf42	NM_017994	3	1	1
HEATR5B	NM_019024	20	18	3
SETX	NM_015046	16	11	1
UBN2	NM_173569	6	3	1
DYNC1H1	NM_001376	33	27	2
TAOK1	NM_020791	17	16	1
ZNF418	NM_133460	3	3	36
CCT2	NM_006431	9	6	53
TMEM41B	NM_015012	5	2	1
TRNT1	NM_182916	4	2	3
CLASP2	NM_015097	11	6	1
PHC3	NM_024947	10	4	1
STAG1	NM_005862	3	3	1
BRD7	NM_013263	8	5	1
PITRM1	NM_014889	6	2	1
WDFY1	NM_020830	7	6	9
SFRS4	NM_005626	3	3	20
FOXP1	NM_032682	12	7	1
LRBA	NM_006726	36	25	2
STIM2	NM_020860	9	3	1
ZFAND6	NM_019006	4	1	17
KDM3B	NM_016604	13	5	1
KPNB1	NM_002265	9	7	21
ILF2	NM_004515	5	3	4
NEK4	NM_003157	14	12	30
PRUNE	NM_021222	4	1	1
SH3GLB1	NM_016009	4	1	1
AFF1	NM_005935	5	1	1
SDCCAG8	NM_006642	11	9	1
ZFYVE26	NM_015346	34	32	1
FOXP1	NM_032682	10	7	5
MFSD8	NM_152778	9	7	1
PKD2	NM_000297	12	6	3
RNPEP	NM_020216	5	4	2
UQCRC2	NM_003366	11	7	5
CHD2	NM_001271	21	14	1
MFF	NM_020194	3	1	1
DMXL1	NM_005509	8	2	1
RBM41	NM_018301	4	4	8
FAM126B	NM_173822	6	1	1
BIRC6	NM_016252	44	35	2
DENND3	NM_014957	9	8	43
RNF10	NM_014868	9	7	1
BNIP3L	NM_004331	4	1	1
CNTLN	NM_017738	14	12	1
KIAA0368	NM_001080398	32	29	238
BAT2D1	NM_015172	31	7	1
C2orf67	NM_152519	3	1	5
ASH1L	NM_018489	6	3	1
CCDC134	NM_024821	2	1	1
DHX8	NM_004941	11	9	1
TOR1AIP1	NM_015602	6	3	1
DHTKD1	NM_018706	5	1	3
KIAA0368	NM_001080398	8	5	1
CEP70	NM_024491	10	2	3
CEP110	NM_007018	36	34	1
IL13RA1	NM_001560	9	1	1
ILKAP	NM_030768	9	5	1
MOBKL1A	NM_173468	3	1	1
NUP88	NM_002532	3	2	4
SSH2	NM_033389	5	5	6
TBC1D22A	NM_014346	11	7	1
MAP3K1	NM_005921	18	15	1
SYMPK	NM_004819	21	10	1
GLCCI1	NM_138426	4	1	4
YEATS2	NM_018023	14	11	1
TTBK2	NM_173500	8	3	8
CDH1	NM_004360	9	6	3
FUBP1	NM_003902	9	3	1
GMPS	NM_003875	6	1	7
RAD23B	NM_002874	3	2	1
BAZ1B	NM_032408	12	7	3
TUBGCP3	NM_006322	13	11	1
TMEM165	NM_018475	3	1	25
BIN2	NM_016293	11	7	1
ANKRD11	NM_013275	5	4	1
MUDENG	NM_018229	2	1	1
GPKOW	NM_015698	8	4	1
LDHA	NM_005566	5	3	1
GPBP1L1	NM_021639	10	8	1
MTR	NM_000254	21	18	1
HUWE1	NM_031407	54	52	1
LRP5	NM_002335	3	1	1
DHX34	NM_014681	1	1	1
PIK3C2A	NM_002645	25	19	1
[truncated: 1,514 more rows]
