# Supplementary material for: Circular RNAs Are the Predominant Transcript Isoform from Hundreds of Human Genes in Diverse Cell Types
Source: PLoS One. 2012 Feb 1;7(2):e30733. doi: 10.1371/journal.pone.0030733 (PMC3270023; doi:10.1371/journal.pone.0030733)
Supplement: Table S2 — List of scrambled isoforms detected in the leukocyte data with RefSeq exon enumeration beginning at exon 0. (TAB) [file pone.0030733.s006.tab]

name NMID exon1 exon2 reads
PICALM	NM_007166	6	1	1
BARD1	NM_000465	5	1	1
COG3	NM_031431	19	16	3
TARSL2	NM_152334	9	3	1
NDUFS1	NM_005006	15	14	1
FOXN2	NM_002158	2	2	1
C19orf29	NM_001080543	1	1	2
CLEC16A	NM_015226	11	9	1
MCPH1	NM_024596	11	9	2
VASP	NM_003370	2	1	2
C2orf67	NM_152519	1	1	2
EIF3I	NM_003757	8	6	1
TBCEL	NM_152715	3	1	1
SEC24A	NM_021982	17	13	3
MIER3	NM_152622	11	9	1
REL	NM_002908	3	1	3
STK39	NM_013233	13	8	1
ZNF425	NM_001001661	2	1	1
BTN2A2	NM_006995	3	2	1
SNX27	NM_030918	1	1	1
YIPF4	NM_032312	4	3	1
IFT80	NM_020800	11	8	5
CSE1L	NM_001316	20	10	1
KPNB1	NM_002265	14	7	4
UBAP2	NM_018449	3	1	2
KIAA0564	NM_015058	11	9	1
OSBPL1A	NM_080597	6	4	1
MTRF1	NM_004294	4	1	1
SETDB2	NM_031915	10	7	1
TRIP12	NM_004238	10	6	1
PHF2	NM_005392	2	1	2
PTGES3	NM_006601	4	1	5
SMC1A	NM_006306	14	13	3
MIB1	NM_020774	5	1	3
STRN	NM_003162	9	1	1
DDX21	NM_004728	5	3	2
ITGB3BP	NM_014288	3	1	1
C13orf18	NM_025113	10	5	1
PDZD7	NM_024895	8	7	2
SLC25A24	NM_013386	5	1	2
BRCA2	NM_000059	6	3	1
ARHGAP15	NM_018460	11	6	1
ARIH2	NM_006321	2	1	1
ASAP1	NM_018482	11	6	4
DUSP16	NM_030640	2	1	1
APBB1IP	NM_019043	7	4	1
CCAR1	NM_018237	20	19	1
KDM3B	NM_016604	10	7	5
STXBP3	NM_007269	16	11	1
FASTKD1	NM_024622	8	5	4
KIAA1704	NM_018559	6	1	1
MLLT10	NM_004641	16	14	3
ATP13A3	NM_024524	4	1	1
CTBP1	NM_001012614	4	2	1
ZDHHC20	NM_153251	9	4	2
GLS	NM_014905	5	3	1
LYST	NM_000081	44	16	1
MDGA1	NM_153487	13	12	1
CHD9	NM_025134	23	17	2
FAM53B	NM_014661	1	1	1
PAPOLA	NM_032632	18	17	1
NR2C2	NM_003298	11	10	5
BIRC6	NM_016252	25	23	1
TIMELESS	NM_003920	8	6	7
PARG	NM_003631	6	2	1
ILKAP	NM_030768	8	5	12
RSRC1	NM_016625	2	1	2
MYO9A	NM_006901	32	26	1
FKBP8	NM_012181	5	4	6
CNOT6L	NM_144571	3	1	5
KPNA5	NM_002269	3	1	4
TRPM7	NM_017672	37	32	2
STAG1	NM_005862	15	9	1
HADHB	NM_000183	9	7	2
ITCH	NM_031483	11	5	1
KLHL24	NM_017644	2	2	3
CNOT6	NM_015455	8	7	1
ASB3	NM_016115	8	2	2
CCDC50	NM_178335	4	1	1
IKBKB	NM_001556	20	19	4
KIAA1407	NM_020817	12	9	1
TPP2	NM_003291	7	5	1
STK3	NM_006281	8	6	2
EP400	NM_015409	14	12	1
SH3GLB1	NM_016009	4	2	1
UPLP	NM_001114403	4	1	1
TAF4B	NM_005640	10	9	1
RNF160	NM_015565	2	1	1
CTCF	NM_006565	9	8	2
GCN1L1	NM_006836	30	28	2
NSUN2	NM_017755	16	14	2
BPTF	NM_004459	24	22	1
ZKSCAN1	NM_003439	2	1	15
SKA3	NM_145061	3	3	3
RLF	NM_012421	4	3	2
GSR	NM_000637	8	5	1
R3HDM1	NM_015361	13	7	4
PCCA	NM_000282	11	8	4
SETD2	NM_014159	8	5	9
SETX	NM_015046	13	11	1
TRPM7	NM_017672	6	3	2
WWC3	NM_015691	4	1	3
ASAP1	NM_018482	11	8	3
RAD50	NM_005732	20	19	1
SCAP	NM_012235	2	1	4
TNFRSF21	NM_014452	2	1	2
GALNS	NM_000512	12	9	1
SRCAP	NM_006662	26	25	3
LOC91316	NR_024448	2	1	2
ZEB1	NR_024285	4	2	2
PCGF3	NM_006315	7	6	1
TTBK2	NM_173500	5	2	6
MGEA5	NM_012215	8	1	2
STAT2	NM_005419	18	13	1
MIB1	NM_020774	9	6	1
PLEKHA2	NM_021623	4	3	2
IRF4	NM_002460	1	1	5
ATP9B	NM_198531	23	17	1
CLNS1A	NM_001293	5	2	4
GLYR1	NM_032569	14	12	1
FAM178A	NM_018121	11	9	3
ATM	NM_000051	55	49	1
ZNF133	NM_003434	5	1	2
BARD1	NM_000465	5	3	1
C2orf67	NM_152519	4	1	1
SCLT1	NM_144643	17	9	1
PTPN2	NM_080422	7	5	1
RNF111	NM_017610	5	1	1
DOCK11	NM_144658	18	14	2
WDR67	NM_145647	7	1	1
DDB2	NM_000107	2	1	2
RBM33	NM_053043	4	2	15
MAP3K7IP2	NM_015093	2	2	1
HSPA4	NM_002154	16	12	1
NPEPPS	NM_006310	12	9	2
RFWD2	NM_022457	13	9	1
PADI4	NM_012387	7	6	1
POM121C	NM_001099415	2	1	1
ELP3	NM_018091	13	10	2
SPG11	NM_025137	31	28	1
BCKDHA	NM_000709	7	1	5
ELF2	NM_006874	5	1	1
TDG	NM_003211	2	1	1
AHCTF1	NM_015446	22	20	1
ANKRD32	NM_032290	3	1	1
CABIN1	NM_012295	28	26	6
TPX2	NM_012112	10	2	5
GON4L	NM_001037533	1	1	3
LYST	NM_000081	11	10	1
NCAPH	NM_015341	13	10	1
FTO	NM_001080432	5	4	1
TNS3	NM_022748	26	20	3
TRMT61B	NM_017910	5	1	1
PDZD2	NM_178140	3	2	1
BPTF	NM_182641	26	20	2
SHOC2	NM_007373	1	1	1
MAN2A1	NM_002372	3	1	11
ZFAND6	NM_019006	4	2	3
C6orf150	NM_138441	2	2	5
DDX20	NM_007204	9	2	1
HDGFRP3	NM_016073	4	1	3
UBAP2	NM_018449	12	10	1
DOCK2	NM_004946	26	25	1
NUP43	NM_198887	3	2	2
ADAM17	NM_003183	10	4	1
PDE3B	NM_000922	13	12	4
FMR1	NM_002024	15	2	1
HEATR2	NM_017802	10	8	1
ZC3H6	NM_198581	7	5	1
SKA3	NM_145061	4	1	2
FAM53B	NM_014661	3	3	1
INTS8	NM_017864	8	6	2
ITGAL	NM_002209	8	7	5
EIF4G3	NM_003760	14	13	1
LNX2	NM_153371	3	1	3
SAFB2	NM_014649	12	11	2
WWC3	NM_015691	7	1	6
PLEKHM3	NM_001080475	2	2	1
EAF2	NM_018456	4	1	1
ING5	NM_032329	4	1	1
WAPAL	NM_015045	13	10	1
ESYT2	NM_020728	19	17	1
RAB3GAP2	NM_012414	3	2	1
STAU2	NM_014393	4	3	9
USP25	NM_013396	17	16	1
MCTP2	NM_018349	0	0	3
ROCK1	NM_005406	21	13	1
USP48	NM_001032730	7	3	1
ELMO1	NM_014800	12	1	1
PIAS1	NM_016166	6	2	1
BPTF	NM_004459	8	5	1
IPO7	NM_006391	23	22	3
PLCG2	NM_002661	12	8	3
PROSC	NM_007198	3	1	1
SH3KBP1	NM_031892	4	3	1
PHF14	NM_001007157	16	6	1
PLCG2	NM_002661	14	12	1
OGDH	NM_002541	7	4	1
RANBP9	NM_005493	11	5	5
USP1	NM_003368	7	5	1
KIAA1012	NM_014939	15	14	1
RHBDD1	NM_032276	1	1	1
XPO4	NM_022459	21	19	4
CANX	NM_001746	7	6	1
FAM114A2	NM_018691	3	1	3
INADL	NM_176877	23	22	1
STRBP	NM_018387	5	2	5
RNF149	NM_173647	5	1	1
PTPN22	NM_015967	10	7	2
BACH2	NM_021813	3	1	3
FBXW4	NM_022039	3	1	2
MAN1A2	NM_006699	2	1	3
ANKIB1	NM_019004	3	1	1
NLK	NM_016231	6	1	1
C14orf145	NM_152446	7	3	1
CSF2RB	NM_000395	9	8	2
SETX	NM_015046	14	11	1
RHBDD1	NM_032276	5	1	1
RPH3AL	NM_006987	4	2	1
CREB3L2	NM_194071	3	2	3
DDX12	NM_004400	22	19	1
PHLPP2	NM_015020	6	4	1
MYO1F	NM_012335	19	0	4
RSF1	NM_016578	10	7	3
TMEM116	NM_138341	10	6	1
MLL3	NM_170606	2	1	1
STAG1	NM_005862	3	3	1
CEPT1	NM_006090	3	1	2
FLI1	NM_002017	3	1	5
LMBR1	NM_022458	3	1	1
PAFAH1B2	NM_002572	3	1	1
PELI2	NM_021255	4	2	3
SHQ1	NM_018130	3	1	1
EPRS	NM_004446	17	13	1
LOC728661	NM_001110781	7	1	1
RANGAP1	NM_002883	2	1	1
SETX	NM_015046	3	2	1
SMC3	NM_005445	19	18	2
C3orf63	NM_001112736	4	1	2
KIAA1407	NM_020817	14	12	1
SCLT1	NM_144643	8	4	2
XRN2	NM_012255	16	14	1
KIF11	NM_004523	17	14	1
SNAP23	NM_003825	6	4	1
HEATR5B	NM_019024	13	12	6
MLL	NM_005933	30	28	1
SMC4	NM_005496	16	14	1
CTCF	NM_006565	9	7	1
RBM4	NM_002896	1	1	4
RARS	NM_002887	4	1	1
ALMS1	NM_015120	9	6	1
ANKRD44	NM_153697	15	13	1
KPNA3	NM_002267	13	12	2
PREX1	NM_020820	28	27	1
WHAMML2	NR_026589	4	1	1
CDADC1	NM_030911	4	1	1
ESYT2	NM_020728	12	8	12
HEATR5B	NM_019024	30	28	1
PANK3	NM_024594	5	5	1
STAM	NM_003473	7	4	1
PDPR	NM_017990	16	13	1
AARS	NM_001605	12	7	1
MGA	NM_001080541	1	1	1
CEP110	NM_007018	23	23	1
LRIG1	NM_015541	8	1	1
PRKAA1	NM_006251	7	1	1
AMD1	NM_001634	3	1	1
SUZ12	NM_015355	9	6	1
MAP3K1	NM_005921	8	2	1
DHX33	NM_020162	3	2	1
FUT10	NM_032664	3	3	3
PCGF3	NM_006315	7	1	2
UBR2	NM_015255	3	2	4
BAZ2B	NM_013450	26	25	1
CAMSAP1	NM_015447	2	1	5
DHRS7	NM_016029	5	3	1
ZMYND8	NM_183048	13	12	1
ACSL1	NM_001995	15	14	1
CHD2	NM_001271	33	31	2
SOS2	NM_006939	17	13	1
PTP4A1	NM_003463	4	1	1
RNF219	NM_024546	4	1	2
TBC1D14	NM_020773	1	1	3
EZH1	NM_001991	3	2	1
P4HB	NM_000918	3	2	6
PRELID2	NM_138492	5	1	4
DGKE	NM_003647	4	2	1
TMEM181	NM_020823	5	2	1
WDFY3	NM_014991	31	29	1
ANKRD28	NM_015199	22	21	2
ATAD2	NM_014109	23	19	1
RFWD2	NM_001001740	8	8	1
PAFAH1B1	NM_000430	4	2	1
RAB2A	NM_002865	5	3	2
SNX13	NM_015132	8	5	4
DCAF17	NM_025000	7	3	1
SUZ12	NM_015355	9	8	1
YARS	NM_003680	11	8	2
AP2A2	NM_012305	9	7	2
TMEM49	NM_030938	4	1	3
ATM	NM_000051	46	43	1
ADCY7	NM_001114	0	0	2
SMG1	NM_015092	40	38	1
RFC1	NM_002913	5	4	1
PITPNB	NM_012399	2	1	1
GMPS	NM_003875	9	7	6
PAK2	NM_002577	6	5	1
C2orf86	NM_015910	9	6	1
FBXO11	NM_025133	10	1	1
NDUFA10	NM_004544	8	4	3
RBBP8	NM_002894	14	8	1
TARDBP	NM_007375	3	1	1
FANCA	NM_000135	29	28	1
FOXK2	NM_004514	3	1	5
FAM188A	NM_024948	7	1	3
RAD21	NM_006265	7	2	1
CAPRIN1	NM_203364	13	12	1
NEK4	NM_003157	14	12	4
C6orf182	NM_001083535	4	3	1
KIAA0368	NM_001080398	32	29	3
VPS33A	NM_022916	10	8	4
GALNT7	NM_017423	1	1	6
SFRS8	NM_004592	10	7	1
LRIG1	NM_015541	8	3	1
PKN2	NM_006256	1	1	2
ZCCHC2	NM_017742	4	1	2
DGKE	NM_003647	7	5	1
HECA	NM_016217	1	1	1
RNF10	NM_014868	5	4	1
DHTKD1	NM_018706	6	1	2
SF3B3	NM_012426	20	18	2
LETMD1	NM_015416	6	4	1
PECR	NM_018441	2	1	4
C12orf51	NM_001109662	27	0	1
KIAA1274	NM_014431	4	1	1
PGAP1	NM_024989	9	5	2
DNAH1	NM_015512	5	3	1
AGTPBP1	NM_015239	22	17	1
IDE	NM_004969	3	1	1
SAMHD1	NM_015474	10	6	1
DTL	NM_016448	4	2	1
PICALM	NM_007166	11	8	1
UBE3A	NM_130839	10	1	1
GDI2	NM_001115156	5	3	2
RPRD1A	NM_018170	5	1	2
ANKRD27	NM_032139	8	5	1
CMPK1	NM_016308	4	1	1
SHKBP1	NM_138392	11	10	3
IFNGR2	NM_005534	5	3	1
NLRC4	NM_021209	7	4	2
PER2	NM_022817	3	1	1
UBE2G1	NM_003342	4	2	3
C17orf57	NM_152347	12	10	1
RNF144A	NM_014746	7	5	5
TNPO3	NM_012470	3	1	11
ZNF277	NM_021994	1	1	3
KLHL28	NM_017658	1	1	1
USP25	NM_013396	2	1	3
BBS1	NM_024649	7	3	1
POLR2A	NM_000937	9	8	8
RSL1D1	NM_015659	4	3	1
HPCAL1	NM_002149	2	2	9
SMCHD1	NM_015295	18	11	1
RC3H1	NM_172071	15	13	1
TET2	NM_001127208	9	6	1
USO1	NM_003715	5	2	1
CAPZA1	NM_006135	6	3	2
CHD6	NM_032221	2	1	4
GOLGA1	NM_002077	2	1	5
PEX26	NM_001127649	2	1	2
KLC1	NM_005552	4	3	2
NPEPL1	NM_024663	8	1	1
KIAA0146	NM_001080394	6	5	3
FAM120A	NM_014612	4	1	2
MED13L	NM_015335	1	1	2
METTL3	NM_019852	2	1	3
ATP6V0A2	NM_012463	8	6	1
MOBKL1B	NM_018221	4	1	1
ACAP2	NM_012287	8	4	1
ATXN10	NM_013236	8	6	2
DPY19L1	NM_015283	12	7	2
ARL8B	NM_018184	3	2	2
SP140	NM_007237	9	8	1
CD38	NM_001775	2	1	1
CRLF3	NM_015986	5	4	1
LMBRD2	NM_001007527	5	1	2
TBC1D23	NM_018309	8	5	4
MGEA5	NM_012215	11	1	3
PIK3C2B	NM_002646	2	2	2
STRBP	NM_018387	16	11	1
WDR37	NM_014023	8	1	5
FAM188A	NM_024948	9	1	2
ITGAL	NM_002209	16	15	1
PLXNC1	NM_005761	8	5	1
PTPN22	NM_015967	17	14	4
UBR2	NM_015255	33	30	1
ZFYVE26	NM_015346	34	32	1
LIMK1	NM_002314	9	7	1
STRN3	NM_001083893	6	1	1
MED17	NM_004268	4	2	1
KLHL8	NM_020803	7	2	4
UTRN	NM_007124	49	1	1
HP1BP3	NM_016287	9	4	1
TRMT2B	NM_024917	12	10	1
RFC2	NM_181471	9	5	1
CENPC1	NM_001812	6	5	1
RALBP1	NM_006788	5	4	4
CLN3	NM_001042432	4	3	2
FAM126A	NM_032581	6	2	1
PPP1R12C	NM_017607	5	3	8
YTHDF1	NM_017798	3	3	3
EHMT1	NM_024757	17	15	1
GTDC1	NM_001006636	3	1	1
ROCK1	NM_005406	20	16	2
FRMD3	NM_174938	12	7	1
RFC2	NM_181471	6	4	2
HERC2	NM_004667	19	17	3
UTRN	NM_007124	43	42	1
UBE3C	NM_014671	17	10	4
DNAL1	NM_031427	6	2	1
CDC2L5	NM_031267	4	1	1
RELL1	NM_001085400	5	3	13
TMEM209	NM_032842	7	5	2
HECW2	NM_020760	27	19	1
PDZD8	NM_173791	3	1	1
LRRC37B	NM_052888	4	3	3
TMEM49	NM_030938	5	3	1
INTS7	NM_015434	3	1	1
UBAP2	NM_018449	5	1	1
BRWD1	NM_018963	36	25	1
PPP2R3C	NM_017917	9	6	1
SEL1L3	NM_015187	12	4	1
HEATR7A	NM_032450	11	7	1
DNA2	NM_001080449	2	1	2
GRN	NM_002087	9	9	1
HABP4	NM_014282	1	1	2
RAD23B	NM_002874	8	6	1
STAU2	NM_014393	4	1	4
USP25	NM_013396	17	9	1
ATP6V0A2	NM_012463	10	1	1
EPC2	NM_015630	6	4	1
RSBN1L	NM_198467	5	3	1
INTS4	NM_033547	9	2	1
MLL3	NM_170606	33	31	1
PIKFYVE	NM_015040	34	20	1
FAM126B	NM_173822	6	5	1
VPS13B	NM_017890	30	29	1
DHX34	NM_014681	1	1	1
C2orf29	NM_017546	3	1	2
RBM4	NM_002896	2	1	3
YBX1	NM_004559	4	4	1
EIF4B	NM_001417	7	7	1
SETD3	NM_032233	5	1	6
UBR1	NM_174916	34	23	1
USP48	NM_001032730	8	1	1
YPEL2	NM_001005404	1	1	1
NUP107	NM_020401	17	11	1
APOOL	NM_198450	7	5	2
EIF2C1	NM_012199	10	9	4
SCLT1	NM_144643	13	6	1
PARP4	NM_006437	14	12	1
AHCTF1	NM_015446	19	16	1
UBE2G1	NM_003342	4	1	1
POLE2	NM_002692	9	5	1
SCNM1	NM_024041	4	2	4
TBC1D1	NM_015173	11	6	1
TMEM38A	NM_024074	3	1	1
USP48	NM_032236	6	3	1
AGTPBP1	NM_015239	5	1	1
KIAA1109	NM_015312	78	75	1
ZNF430	NM_025189	3	2	1
ZDHHC21	NM_178566	4	2	2
LYST	NM_000081	24	11	1
SAPS2	NM_014678	2	1	1
C12orf11	NM_018164	7	3	1
NCAPH	NM_015341	14	9	1
STAT3	NM_003150	7	4	1
IQGAP1	NM_003870	32	30	1
CHD1	NM_001270	29	25	1
DPY19L1	NM_015283	5	1	3
MGA	NM_001080541	4	2	1
ZNF492	NM_020855	2	1	1
SLC20A2	NM_006749	7	2	1
DDX6	NM_004397	8	6	2
FAM120A	NM_014612	9	5	1
SCYL2	NM_017988	3	1	3
SEC62	NM_003262	6	2	1
IFI16	NM_005531	7	7	2
TRA2B	NM_004593	5	3	3
VRK1	NM_003384	10	1	11
BARD1	NM_000465	8	3	1
TBC1D1	NM_015173	14	11	1
DNAJC16	NM_015291	3	2	1
ARFGEF1	NM_006421	18	14	2
BIRC6	NM_016252	36	35	3
ABCA13	NM_152701	40	39	1
GDI2	NM_001494	3	1	3
KIAA1199	NM_018689	10	2	2
SF3A3	NM_006802	3	2	1
TDG	NM_003211	3	1	1
PGM1	NM_002633	9	7	1
BPTF	NM_182641	13	12	1
HEATR3	NM_182922	10	2	4
RIF1	NM_018151	19	15	1
CRISPLD2	NM_031476	1	1	1
ZNF292	NM_015021	3	1	1
SPATA6	NM_019073	10	9	1
SSH2	NM_033389	12	11	1
THADA	NM_001083953	25	22	1
SEC63	NM_007214	10	2	1
EBF1	NM_024007	9	6	1
FNDC3A	NM_001079673	13	8	1
STAM2	NM_005843	5	2	1
KIAA0317	NM_001039479	17	8	1
FOXP1	NM_032682	10	7	1
AKAP8	NM_005858	11	9	4
EIF2AK1	NM_014413	5	2	3
ACSS1	NM_032501	6	2	1
NPEPPS	NM_006310	20	18	1
UHRF1	NM_013282	9	6	1
UBAP2	NM_018449	13	10	2
YTHDF2	NM_016258	3	3	1
CANX	NM_001746	6	3	1
SLC15A4	NM_145648	1	1	6
MLYCD	NM_012213	3	1	1
PHC3	NM_024947	10	4	1
RICTOR	NM_152756	6	3	1
ALMS1	NM_015120	14	13	1
C9orf91	NM_153045	7	5	1
GATAD2A	NM_017660	6	2	2
MYO1F	NM_012335	18	15	2
LNPEP	NM_005575	7	4	1
RBM16	NM_014892	5	1	3
SNX13	NM_015132	11	9	1
LCORL	NM_153686	3	1	3
C12orf51	NM_001109662	56	55	1
CEP135	NM_025009	20	19	1
SRP68	NM_014230	3	1	4
ASH1L	NM_018489	4	3	2
RPRD1B	NM_021215	5	1	4
ASCC3	NM_006828	2	1	1
BRWD1	NM_033656	26	25	1
ACVR2A	NM_001616	3	1	1
MCTP2	NM_018349	18	16	1
UBAP2	NM_018449	5	2	5
DIP2B	NM_173602	18	11	1
UBAC2	NM_001144072	3	1	1
GPSM1	NM_001145638	8	1	3
SAFB2	NM_014649	10	9	7
C1GALT1	NM_020156	2	1	1
MPP6	NM_016447	9	2	2
CCAR1	NM_018237	14	11	3
CSGALNACT2	NM_018590	2	1	2
DOPEY2	NM_005128	20	19	11
R3HDM1	NM_015361	19	18	1
ZBTB11	NM_014415	2	1	1
BTBD10	NM_032320	5	2	2
POLI	NM_007195	3	1	1
SLC38A1	NM_030674	4	1	6
ZNF720	NM_001130913	2	1	3
RAD18	NM_020165	6	4	2
DHX37	NM_032656	20	18	1
ME2	NM_002396	11	1	2
PDE4D	NM_001104631	10	6	1
KIAA1199	NM_018689	12	11	1
MAN1A2	NM_006699	5	1	13
ENGASE	NM_001042573	2	1	1
CLN3	NM_001042432	6	3	1
DOCK11	NM_144658	22	8	1
DZIP3	NM_014648	24	16	1
LZIC	NM_032368	5	2	6
SUSD1	NM_022486	3	3	1
HP1BP3	NM_016287	8	4	2
PHC3	NM_024947	6	4	7
DNAJA1	NM_001539	6	2	2
GTDC1	NM_001006636	3	2	2
NCF1B	NR_003186	3	3	1
RIN2	NM_018993	3	1	4
SF3B3	NM_012426	16	13	1
DENND5A	NM_015213	3	1	1
PPIL5	NM_152329	2	2	1
SBF2	NM_030962	29	26	1
RHBDD1	NM_032276	2	1	1
DTL	NM_016448	12	10	1
YTHDC2	NM_022828	18	14	1
CDC2L5	NM_031267	4	2	1
CLUAP1	NM_015041	3	1	1
FAM190B	NM_018999	2	1	1
KIF20B	NM_016195	28	23	2
PCCB	NM_000532	13	5	3
BARD1	NM_000465	3	2	2
BIRC6	NM_016252	9	8	1
TRRAP	NM_003496	50	46	1
PITPNA	NM_006224	9	1	1
UXS1	NM_025076	5	1	1
UBR5	NM_015902	36	35	1
TBC1D1	NM_015173	14	12	7
WDR1	NM_017491	4	2	2
AMOTL1	NM_130847	2	1	2
PARP8	NM_024615	13	7	1
TM9SF2	NM_004800	5	3	1
GLT25D1	NM_024656	9	1	1
FAM188A	NM_024948	8	1	3
PICALM	NM_007166	18	13	1
DHX34	NM_014681	5	1	1
NBAS	NM_015909	11	9	2
PCMTD1	NM_052937	1	1	17
OSTF1	NM_012383	8	2	1
SAMSN1	NM_022136	4	4	1
ZNF607	NM_032689	3	1	2
FKBP8	NM_012181	3	2	33
SMARCC1	NM_003074	5	1	1
TCFL5	NM_006602	3	2	4
FAM129C	NM_173544	12	10	1
HNRNPA3	NM_194247	6	5	1
RCAN3	NM_013441	1	1	3
RSF1	NM_016578	13	7	1
USP3	NM_006537	7	3	2
ZEB2	NM_014795	1	1	3
MTMR10	NM_017762	4	2	1
FGD4	NM_139241	12	10	1
LMBR1	NM_022458	8	1	1
PSME4	NM_014614	33	27	1
AKAP10	NM_007202	13	12	1
PIKFYVE	NM_015040	34	31	4
ARPC1B	NM_005720	4	2	1
LNPEP	NM_005575	3	1	1
ATM	NM_000051	6	4	1
ST13	NM_003932	7	4	1
C3orf63	NM_001112736	10	1	6
ITGAX	NM_000887	11	9	1
VAV3	NM_006113	14	12	1
DAGLB	NM_139179	4	2	1
TRPM7	NM_017672	9	7	1
UBR5	NM_015902	4	1	9
ZNF236	NM_007345	2	1	3
ABCC5	NM_005688	9	8	1
MLL3	NM_170606	5	3	1
EP300	NM_001429	9	2	1
HELQ	NM_133636	7	6	1
MACF1	NM_033044	21	20	1
KDM1A	NM_001009999	3	1	1
BRAF	NM_004333	12	7	1
ARAP2	NM_015230	1	1	1
TOPBP1	NM_007027	18	16	1
ZC3H13	NM_015070	7	4	1
LRMP	NM_006152	8	5	1
TMEM8A	NM_021259	10	1	1
NCOR1	NM_006311	13	6	1
RPRD1B	NM_021215	5	3	5
DNA2	NM_001080449	4	3	1
STK10	NM_005990	15	14	1
TNKS2	NM_025235	23	19	1
YEATS2	NM_018023	24	21	2
CCDC126	NM_138771	2	2	18
SUCLG1	NM_003849	7	1	1
EPB41L5	NM_020909	9	3	2
TRA2B	NM_004593	5	4	2
TTC7B	NM_001010854	2	1	3
TUBGCP4	NM_014444	6	4	6
NIPBL	NM_015384	44	43	5
USP10	NM_005153	10	1	1
ZCCHC17	NM_016505	4	3	1
CNTLN	NM_017738	17	12	1
CRKL	NM_005207	1	1	4
ILF2	NM_004515	7	3	4
PACS1	NM_018026	20	19	5
ZNF675	NM_138330	2	1	1
FAM118A	NM_017911	5	4	2
HACE1	NM_020771	5	3	5
PICALM	NM_001008660	11	8	1
CARD11	NM_032415	3	2	1
CCDC21	NM_022778	8	7	1
SNRNP48	NM_152551	7	5	2
FAM125B	NM_033446	6	1	2
FLVCR1	NM_014053	7	2	3
SESTD1	NM_178123	15	13	1
GNB1	NM_002074	6	5	3
LRCH3	NM_032773	5	2	1
RBM23	NM_001077351	2	1	8
CCDC134	NM_024821	3	1	4
MCTP2	NM_018349	12	7	3
AAGAB	NM_024666	4	1	2
ZNF131	NM_003432	5	1	3
POLR3A	NM_007055	15	14	4
EHD2	NM_014601	3	3	3
MCTP2	NM_018349	10	7	1
SDAD1	NM_018115	13	1	1
FOXP1	NM_032682	11	7	2
GNB2L1	NM_006098	6	5	1
ACTR3	NM_005721	9	6	1
AMBRA1	NM_017749	11	8	4
MAP2K4	NM_003010	3	2	2
PIWIL4	NM_152431	3	1	1
REL	NM_002908	6	4	1
UBAP2L	NM_014847	13	12	1
SLC30A7	NM_133496	7	2	1
SHPRH	NM_001042683	28	25	1
ALS2	NM_020919	3	3	4
ZFAND6	NM_019006	4	1	4
AP3B1	NM_003664	16	11	2
FLNA	NM_001110556	45	45	2
RECQL4	NM_004260	5	4	2
STRN	NM_003162	6	3	1
ARFGEF1	NM_006421	6	1	1
OXR1	NM_181354	6	5	1
RFC1	NM_002913	8	6	1
RNF13	NM_007282	8	2	4
USP9Y	NM_004654	21	15	1
ASH2L	NM_001105214	9	5	1
HEATR5B	NM_019024	32	28	2
KPNA5	NM_002269	6	1	1
MTG1	NM_138384	8	1	5
ZNF445	NM_181489	2	2	1
ARAP1	NM_001040118	10	7	2
RELB	NM_006509	6	4	1
TEX9	NM_198524	8	4	1
IQGAP1	NM_003870	8	5	4
PRIM1	NM_000946	8	5	2
SMC5	NM_015110	16	10	1
LRBA	NM_006726	35	31	1
HTT	NM_002111	5	1	2
ZNF766	NM_001010851	2	1	1
FAM73A	NM_198549	4	2	1
PI4K2B	NM_018323	6	1	1
CLN3	NM_000086	3	2	1
BIRC6	NM_016252	4	1	4
STAG1	NM_005862	8	4	1
ATP9B	NM_198531	7	4	1
CAMSAP1	NM_015447	4	1	1
MACF1	NM_012090	53	52	1
SELI	NM_033505	5	1	1
LAMP1	NM_005561	2	1	6
NEK1	NM_012224	23	18	1
CTPS	NM_001905	17	15	1
TRPM7	NM_017672	28	25	1
RARS	NM_002887	6	1	6
AFG3L2	NM_006796	8	5	1
HPRT1	NM_000194	5	1	3
ZCCHC7	NM_032226	1	1	6
DOPEY2	NM_005128	18	18	1
DHX29	NM_019030	22	17	2
SMARCC1	NM_003074	4	1	1
KPNA5	NM_002269	6	4	1
PIP5K1C	NM_012398	4	3	2
SNX27	NM_030918	7	2	1
SPCS2	NM_014752	3	1	1
NUP54	NM_017426	2	1	1
SDCCAG8	NM_006642	15	13	2
TM7SF3	NM_016551	3	2	1
CHD1L	NM_004284	11	5	1
MYCBP2	NM_015057	21	16	1
TBCK	NM_033115	22	18	1
RCSD1	NM_052862	5	3	1
WHAMML2	NR_026589	6	1	1
HSPA4L	NM_014278	7	3	1
MANBA	NM_005908	4	1	14
SMAP2	NM_022733	3	1	1
CCDC138	NM_144978	12	10	3
NACC2	NM_144653	4	2	1
NPLOC4	NM_017921	7	5	1
TMEM181	NM_020823	5	3	1
PPIL4	NM_139126	6	4	1
ANKRD13C	NM_030816	8	3	2
PDIA4	NM_004911	2	1	1
PPP1CB	NM_002709	5	4	1
KIF15	NM_020242	9	4	1
RAB2A	NM_002865	5	2	2
UBAP2L	NM_001127320	13	12	1
CFLAR	NM_001127183	7	5	3
CANX	NM_001746	6	1	2
RICTOR	NM_152756	4	2	1
CHD2	NM_001271	30	28	2
OMA1	NM_145243	6	2	2
RRAGD	NM_021244	3	2	1
TMEM49	NM_030938	6	3	1
C17orf57	NM_152347	22	17	2
PLXDC2	NM_032812	8	5	4
KCTD3	NM_016121	6	3	4
STRBP	NM_018387	16	14	1
DDX26B	NM_182540	6	2	1
KATNA1	NM_007044	8	6	1
NEK9	NM_033116	15	10	1
TBK1	NM_013254	10	8	3
UBN2	NM_173569	6	2	4
ANKRD28	NM_015199	7	1	1
HERPUD2	NM_022373	5	3	2
RAB11FIP1	NM_001002814	1	1	3
DECR1	NM_001359	7	6	1
MLL5	NM_182931	11	6	3
TUBGCP5	NM_052903	21	16	1
SNX2	NM_003100	6	3	2
TMCO3	NM_017905	8	7	1
CTCF	NM_006565	3	2	1
EHMT1	NM_024757	24	18	4
ESPL1	NM_012291	8	7	1
MAN1A2	NM_006699	4	1	29
HUWE1	NM_031407	6	3	3
ITCH	NM_031483	11	8	1
NUDC	NM_006600	5	4	5
ELMO1	NM_014800	9	1	1
HSPA4	NM_002154	12	11	2
STAG1	NM_005862	11	7	1
DYNC1H1	NM_001376	21	12	1
MANBA	NM_005908	12	5	1
ZNF512	NM_032434	6	3	1
MOBKL1B	NM_018221	3	2	2
MRPS36	NM_033281	2	1	1
IPO7	NM_006391	11	8	1
ATP10D	NM_020453	20	18	1
CCT2	NM_006431	7	6	2
RNF115	NM_014455	7	1	1
B3GALNT2	NM_152490	5	1	1
BAT2D1	NM_015172	19	17	1
IFNGR2	NM_005534	3	2	1
WDFY1	NM_020830	9	6	2
MPP6	NM_016447	5	2	4
SELL	NM_000655	4	4	1
SETD8	NM_020382	4	2	1
CEP192	NM_032142	10	1	2
ATP8B4	NM_024837	7	3	1
BRWD2	NM_018117	22	18	3
PICALM	NM_001008660	6	1	1
OGDH	NM_002541	8	6	1
AGTPBP1	NM_015239	7	1	4
HTT	NM_002111	38	35	1
HBS1L	NM_001145207	3	2	1
SFRS2IP	NM_004719	10	10	1
XRCC6BP1	NM_033276	4	2	2
DYM	NM_017653	5	3	4
DDX26B	NM_182540	8	2	1
CPSF6	NM_007007	8	1	1
IFFO1	NM_080730	5	4	3
PLEK	NM_002664	7	4	1
UBR1	NM_174916	26	23	1
CLN3	NM_000086	5	2	1
POLD1	NM_002691	2	1	1
PPFIA1	NM_003626	18	16	2
RALB	NM_002881	3	2	2
APBB1IP	NM_019043	10	8	1
ATL2	NM_022374	8	4	2
KLHL8	NM_020803	1	1	1
PDE3B	NM_000922	3	1	3
UBE2Q2	NM_173469	10	9	1
BRWD1	NM_018963	26	25	1
ATXN2	NM_002973	10	7	1
GTF2E1	NM_005513	1	1	1
UBE3C	NM_014671	16	13	1
TOX	NM_014729	2	1	6
AP3S1	NM_001284	4	1	1
ASH2L	NM_004674	9	5	2
VPS53	NM_001128159	10	4	4
GNB1	NM_002074	4	1	2
ROCK1	NM_005406	27	5	1
STK3	NM_006281	9	6	1
TCEA1	NM_006756	3	1	2
TET3	NM_144993	2	1	1
TBC1D1	NM_015173	6	4	3
NUP88	NM_002532	3	1	1
PSMB1	NM_002793	3	1	1
SSB	NM_003142	10	8	1
EVI5	NM_005665	8	2	1
RAB6A	NM_198896	5	1	2
MKL1	NM_020831	6	3	3
ATF2	NM_001880	9	4	1
BRF1	NM_001519	9	7	1
GDI2	NM_001494	5	3	1
NUP133	NM_018230	20	16	1
ATP13A3	NM_024524	10	7	1
SMYD3	NM_022743	7	5	2
MYST2	NM_007067	6	4	2
PAN3	NM_175854	10	7	2
USP48	NM_001032730	6	3	1
NOTCH2NL	NM_203458	3	3	2
SDCCAG1	NM_004713	21	18	1
KLHL24	NM_017644	2	1	1
PREX1	NM_020820	6	3	1
NEIL3	NM_018248	8	7	10
CPT1A	NM_001876	17	15	1
SCLT1	NM_144643	8	5	12
KLHL24	NM_017644	6	1	2
TRIT1	NM_017646	2	1	1
ANPEP	NM_001150	5	1	1
ZNF280C	NM_017666	7	1	2
CPT1A	NM_001876	9	9	1
NCOR1	NM_006311	33	31	1
ARHGAP12	NM_018287	2	1	1
ARID3B	NM_006465	3	2	1
SEC63	NM_007214	3	1	2
DOCK11	NM_144658	5	4	1
EP300	NM_001429	8	6	1
SETD2	NM_014159	8	6	3
ZDHHC2	NM_016353	9	8	1
KLHDC10	NM_014997	4	3	1
PDCD11	NM_014976	26	25	8
KDM4B	NM_015015	8	5	1
PKD2	NM_000297	12	9	2
OMA1	NM_145243	7	1	2
R3HDM1	NM_015361	2	1	1
RAB30	NM_014488	4	2	1
UGP2	NM_001001521	2	1	2
LMTK2	NM_014916	10	9	8
KLC1	NM_001130107	4	3	3
PANK2	NM_153638	5	3	1
BIRC6	NM_016252	14	9	1
C2orf67	NM_152519	7	5	1
PFTK1	NM_012395	1	1	1
WDFY1	NM_020830	7	6	6
DMXL2	NM_015263	32	31	1
NPEPPS	NM_006310	16	9	1
UBR2	NM_015255	33	31	1
FBXO7	NM_012179	3	1	1
LCMT1	NM_016309	8	5	1
PAX5	NM_016734	2	1	1
MFSD8	NM_152778	11	6	1
CLEC16A	NM_015226	17	10	1
C22orf30	NM_173566	1	1	1
EPRS	NM_004446	14	13	1
XPO6	NM_015171	13	11	1
BPTF	NM_004459	28	22	2
CHD1	NM_001270	24	22	1
DOCK11	NM_144658	5	1	1
SIK3	NM_025164	5	3	3
WDR41	NM_018268	3	2	1
WDR49	NM_178824	13	6	2
C14orf145	NM_152446	6	3	2
PARP4	NM_006437	16	12	2
UGP2	NM_006759	2	1	1
AEBP2	NM_153207	4	2	1
ESYT2	NM_020728	5	1	1
FOXK2	NM_004514	2	1	5
LPGAT1	NM_014873	5	2	1
C11orf30	NM_020193	13	9	1
CCDC45	NM_138363	16	5	1
ANKRD52	NM_173595	7	7	1
L3MBTL4	NM_173464	4	1	1
MBOAT2	NM_138799	3	1	13
UBAP2	NM_018449	11	8	7
CTDP1	NM_004715	3	1	2
ZNF362	NM_152493	7	6	3
ATXN2	NM_002973	13	11	1
ITGA4	NM_000885	9	4	1
TMEM184B	NM_012264	2	1	1
ASXL1	NM_015338	2	1	2
CREBL2	NM_001310	1	1	1
HERC2	NM_004667	22	7	1
TFCP2	NM_005653	3	1	1
C3orf1	NM_016589	5	1	2
KIAA0802	NM_015210	3	2	2
TMEM131	NM_015348	14	11	1
SETD2	NM_014159	4	2	1
SMG1	NM_015092	54	49	1
BRD7	NM_013263	8	5	3
TRNT1	NM_182916	4	2	1
C17orf101	NM_175902	6	3	1
KIF15	NM_020242	27	24	2
RBM33	NM_053043	4	1	2
STIM2	NM_020860	9	3	1
SUCLG2	NM_003848	8	7	3
EHMT1	NM_024757	8	6	1
PDLIM1	NM_020992	3	1	1
FAM73A	NM_198549	11	8	1
FGD4	NM_139241	9	7	3
CLASP2	NM_015097	34	33	1
SCAPER	NM_020843	15	14	2
CIRH1A	NM_032830	7	4	1
RBM33	NM_053043	7	6	1
PCNXL2	NM_014801	20	17	2
PNN	NM_002687	7	6	1
DNAJB12	NM_001002762	4	3	2
MAP3K5	NM_005923	24	14	8
SNX27	NM_030918	6	1	3
SUMF1	NM_182760	6	3	2
ARMC1	NM_018120	2	1	1
CAPRIN1	NM_203364	14	9	1
ME2	NM_002396	12	6	1
USP9Y	NM_004654	5	2	1
CCDC134	NM_024821	5	1	1
SNX27	NM_030918	4	2	1
FAM82A2	NM_018145	5	4	2
MRPL2	NM_015950	5	2	6
PHF8	NM_015107	15	14	1
ANKRD27	NM_032139	16	13	4
SEC11A	NM_014300	3	1	6
GPBP1L1	NM_021639	3	2	2
SCLT1	NM_144643	17	11	1
TTC17	NM_018259	14	8	1
VPS24	NM_016079	4	3	1
FBN1	NM_000138	61	60	1
FNDC3A	NM_001079673	7	6	2
AQR	NM_014691	25	20	1
UBXN7	NM_015562	4	2	3
FAM105A	NM_019018	4	1	1
MAN1A2	NM_006699	3	1	3
PPIG	NM_004792	8	1	1
SLC38A10	NM_001037984	7	3	1
METRNL	NM_001004431	1	1	1
SYNE1	NM_182961	11	8	1
SRBD1	NM_018079	13	9	6
KIAA0907	NM_014949	9	6	9
PAFAH1B2	NM_002572	4	2	3
RTTN	NM_173630	25	23	2
SETDB2	NM_031915	1	1	1
FLJ40330	NR_015424	14	12	2
UIMC1	NM_016290	2	1	1
CCNB1	NM_031966	6	5	2
DIAPH2	NM_006729	16	14	1
FLI1	NM_002017	2	1	1
KIAA0182	NM_014615	1	1	51
MANBA	NM_005908	3	1	1
SFRS18	NM_032870	3	1	1
CCDC21	NM_022778	6	4	2
CEP70	NM_024491	5	2	1
SDCCAG1	NM_004713	15	10	2
SIAE	NM_170601	6	5	2
STAG1	NM_005862	12	7	2
PDLIM5	NM_006457	10	8	1
PIK3C3	NM_002647	15	11	2
AFF2	NM_002025	2	2	8
CLIP4	NM_024692	7	4	2
STK39	NM_013233	7	2	7
FGD4	NM_139241	9	4	3
APLF	NM_173545	7	1	4
UBXN7	NM_015562	7	5	1
C6orf72	NM_138785	6	3	2
FOXO1	NM_002015	1	1	2
PLCG2	NM_002661	6	2	1
TOP1	NM_003286	12	8	1
NAIP	NM_004536	7	6	1
UBAP2	NM_018449	11	6	1
MYO9A	NM_006901	30	25	1
C12orf48	NM_017915	6	3	1
XYLT1	NM_022166	4	3	1
SIGLEC12	NM_053003	1	1	2
SPPL3	NM_139015	5	3	3
TFCP2	NM_005653	7	1	1
AGTPBP1	NM_015239	16	8	3
EIF4B	NM_001417	5	1	3
CHD2	NM_001271	25	14	1
LYST	NM_000081	18	16	1
ANKRD32	NM_032290	8	4	2
RARS2	NM_020320	4	1	1
SETD2	NM_014159	13	12	1
C17orf57	NM_152347	9	2	1
MLLT10	NM_004641	21	17	2
ZNF346	NM_012279	4	1	6
DYNC1LI1	NM_016141	6	2	2
EIF4ENIF1	NM_019843	13	10	5
SEC23A	NM_006364	6	1	1
CLIP2	NM_032421	2	2	3
PSMA7	NM_002792	3	1	1
GRHPR	NM_012203	3	1	3
MAP2K4	NM_003010	2	1	1
YBX1	NM_004559	3	3	1
ANKRD17	NM_032217	26	24	1
ADAP1	NM_006869	5	2	3
EPS15	NM_001981	17	14	2
MTM1	NM_000252	5	1	1
HAUS6	NM_017645	9	4	1
HERC5	NM_016323	17	11	3
ZCCHC10	NM_017665	1	1	1
CHAF1A	NM_005483	2	1	3
PAK2	NM_002577	9	5	3
RLF	NM_012421	4	2	2
SOS2	NM_006939	6	1	6
TEP1	NM_007110	6	2	1
JHDM1D	NM_030647	4	2	1
UBAP2	NM_018449	14	10	1
MPHOSPH10	NM_005791	7	5	1
ARFGAP2	NM_032389	14	10	1
XRN2	NM_012255	15	13	1
ZC3H7B	NM_017590	12	11	3
EIF2C1	NM_012199	10	8	1
ALMS1	NM_015120	8	7	1
SMARCC1	NM_003074	17	13	3
RPA1	NM_002945	4	1	1
C18orf45	NM_032933	4	3	2
RHOF	NM_019034	3	2	3
YLPM1	NM_019589	5	2	2
LCP1	NM_002298	5	4	1
NUPL2	NM_007342	2	1	2
MYO19	NM_025109	10	6	2
ST6GALNAC3	NM_152996	2	2	1
NCOA2	NM_006540	3	2	1
MAP3K1	NM_005921	12	9	1
ZC3H11A	NM_014827	14	14	2
STAT5A	NM_003152	11	10	1
ZNF608	NM_020747	1	1	2
FNTA	NM_002027	2	1	2
CAPRIN1	NM_005898	13	12	2
CLASP2	NM_015097	5	1	2
GLCCI1	NM_138426	4	1	1
TTC7A	NM_020458	4	3	1
WDR37	NM_014023	8	5	1
SDHAF2	NM_017841	2	1	4
ATL2	NM_022374	3	2	1
RPAP2	NM_024813	11	8	2
USP7	NM_003470	5	1	1
ZFYVE26	NM_015346	30	28	1
AP3B1	NM_003664	21	15	2
CEP192	NM_032142	13	11	3
IL4R	NM_000418	6	5	1
SNX25	NM_031953	5	1	1
UBE2Q2	NM_173469	4	2	1
MRPS35	NM_021821	4	1	1
CHD1	NM_001270	25	12	1
PRKCB	NM_002738	4	3	7
PRPF40A	NM_017892	16	5	1
DOCK11	NM_144658	22	14	2
TMED2	NM_006815	2	1	1
TMEM56	NM_152487	4	1	3
BRIP1	NM_032043	13	11	1
N4BP2	NM_018177	7	5	1
EXOC6B	NM_015189	5	2	1
LUC7L2	NM_016019	4	3	1
RAB6A	NM_198896	5	3	4
M6PR	NM_002355	4	3	1
PTCD3	NM_017952	6	1	1
CTBP1	NM_001012614	4	1	3
GDI2	NM_001494	5	1	1
RIOK1	NM_031480	13	12	1
MED13	NM_005121	4	3	2
SETBP1	NM_015559	1	1	2
PHC3	NM_024947	6	5	1
DNAJA2	NM_005880	4	3	2
TRNT1	NM_182916	4	3	2
UBE3C	NM_014671	3	1	2
CFLAR	NM_001127183	3	1	1
FNDC3B	NM_022763	5	4	10
DNAJC5	NM_025219	3	1	1
DNAJC6	NM_014787	3	1	1
AFF2	NM_002025	2	1	1
USP48	NM_032236	7	3	1
LTBP3	NM_001130144	22	22	1
STK38	NM_007271	3	1	2
FBXO30	NM_032145	1	1	1
NIPBL	NM_015384	8	1	1
CCT6P1	NR_003110	6	4	2
VRK1	NM_003384	10	5	1
PDS5B	NM_015032	7	3	1
WHSC1L1	NM_017778	1	1	1
PIP5K1C	NM_012398	7	2	2
ACSF3	NM_174917	3	1	2
RANBP9	NM_005493	8	5	10
AHSA1	NM_012111	5	4	1
MGA	NM_001080541	6	5	1
ESYT2	NM_020728	12	1	1
CDC42SE1	NM_001038707	3	2	1
NSD1	NM_022455	3	2	1
TRIM25	NM_005082	3	2	2
SMARCA5	NM_003601	15	14	17
TSPAN3	NM_005724	5	1	5
EML5	NM_183387	8	2	1
LOC375190	NM_001145710	6	2	2
WDR78	NM_024763	3	1	1
INTS8	NM_017864	3	2	4
PRPF39	NM_017922	3	1	1
SMURF2	NM_022739	11	10	1
LRP6	NM_002336	1	1	1
STT3B	NM_178862	2	1	4
LRBA	NM_006726	53	49	1
C12orf30	NM_024953	7	5	1
GUSB	NM_000181	10	9	1
MDN1	NM_014611	22	21	6
KIF15	NM_020242	23	20	1
N4BP2L2	NM_033111	5	2	8
USPL1	NM_005800	3	3	1
ATXN2	NM_002973	4	1	2
CDKAL1	NM_017774	7	5	2
PRKRIP1	NM_024653	3	1	1
MGA	NM_001080541	8	2	4
AGTPBP1	NM_015239	22	13	1
ZBTB7A	NM_015898	1	1	2
ABCA13	NM_152701	54	50	1
DOCK11	NM_144658	6	1	4
RABGEF1	NM_014504	7	5	2
ZMYM4	NM_005095	27	26	1
CEP135	NM_025009	22	21	2
SNAPC3	NM_001039697	4	2	1
EPHB4	NM_004444	11	10	2
ROCK1	NM_005406	24	21	1
PLCL2	NM_001144382	3	2	1
NAIP	NM_004536	8	6	1
KIF11	NM_004523	20	14	1
FNDC3B	NM_022763	5	1	1
ITPR2	NM_002223	44	26	1
MGAT5	NM_002410	13	10	1
KIF3B	NM_004798	4	2	1
USP3	NM_006537	6	3	3
PCCB	NM_000532	4	3	1
PLCG2	NM_002661	16	12	11
SCMH1	NM_001031694	9	8	12
XPO5	NM_020750	12	11	1
LRIG1	NM_015541	12	9	1
MDN1	NM_014611	22	15	2
NMT1	NM_021079	2	1	1
MORC3	NM_015358	13	12	1
MAN2B1	NM_000528	17	10	1
ZDHHC17	NM_015336	15	1	1
KNTC1	NM_014708	62	43	1
BRWD1	NM_033656	36	33	1
BAZ1B	NM_032408	15	7	1
UIMC1	NM_016290	9	6	3
COG1	NM_018714	8	7	1
ARFGEF1	NM_006421	3	1	4
DCUN1D2	NM_001014283	3	1	1
PHAX	NM_032177	1	1	1
FMNL1	NM_005892	10	7	1
MLL3	NM_170606	8	3	3
NBAS	NM_015909	37	35	1
SP3	NM_001017371	1	1	1
CCNYL1	NM_152523	7	2	1
ARCN1	NM_001655	4	1	1
PHIP	NM_017934	6	4	3
CBL	NM_005188	10	3	1
TERF2	NM_005652	7	5	1
GDI2	NM_001494	6	4	2
RAB11FIP4	NM_032932	12	10	1
CASK	NM_001126055	7	5	1
EMILIN2	NM_032048	3	3	1
SNHG12	NR_024127	2	1	1
SEC63	NM_007214	3	2	2
CORO1C	NM_014325	7	6	12
BRAF	NM_004333	14	4	1
DDX21	NM_004728	1	1	1
WAC	NR_024557	6	6	1
SRBD1	NM_018079	13	10	1
APPL1	NM_012096	9	6	3
GNB1	NM_002074	4	2	1
KDM4B	NM_015015	4	2	1
ASH2L	NM_004674	8	5	1
CRLF3	NM_015986	6	5	1
MGAM	NM_004668	43	21	3
RAB6A	NM_198896	5	2	11
SBF2	NM_030962	21	19	1
IFNAR1	NM_000629	7	5	1
EGLN1	NM_022051	2	1	2
MYST4	NM_012330	2	1	1
GMIP	NM_016573	6	4	2
RNF111	NM_017610	1	1	7
STARD7	NM_020151	5	1	2
TBCK	NM_033115	16	8	1
DENND5B	NM_144973	10	8	1
RNF169	NM_001098638	3	1	2
PRKCB	NM_002738	15	12	1
EIF2AK3	NM_004836	12	1	2
AFF4	NM_014423	12	11	3
TUBGCP3	NM_006322	16	11	1
CCDC91	NM_018318	4	2	1
RNF13	NM_007282	8	6	1
SDK1	NM_152744	3	1	1
ADAM10	NM_001110	10	6	1
NFAM1	NM_145912	1	1	3
NEIL3	NM_018248	7	7	6
WASF2	NM_006990	5	1	1
SAFB	NM_002967	12	9	2
RAPGEF6	NM_016340	15	5	1
SLK	NM_014720	14	11	1
RBL1	NM_002895	8	6	1
LYST	NM_000081	15	14	1
SMCHD1	NM_015295	30	25	1
CCAR1	NM_018237	18	10	2
TPM4	NM_003290	6	3	1
EYA3	NM_001990	5	2	2
HSPG2	NM_005529	73	71	4
MIB1	NM_020774	16	1	1
C3orf1	NM_016589	5	2	2
CUX1	NM_181552	13	9	3
RPS6KA5	NM_004755	4	3	1
KATNAL2	NM_031303	6	1	3
PABPC1	NM_002568	3	1	1
NADK	NM_023018	6	5	1
AP3B1	NM_003664	20	11	1
OSBP	NM_002556	8	7	1
BIRC6	NM_016252	16	15	1
WDR52	NM_018338	12	7	1
DISP1	NM_032890	5	3	1
MAP3K1	NM_005921	5	3	3
USP48	NM_032236	6	5	1
P2RX1	NM_002558	7	1	4
KIAA1841	NM_001129993	9	8	2
ATM	NM_000051	42	40	1
AGTPBP1	NM_015239	16	13	2
INPP5B	NM_005540	22	19	2
MYO9A	NM_006901	40	40	2
PHF15	NM_015288	3	1	1
ARMC8	NM_015396	18	13	1
KIF15	NM_020242	7	5	1
CPSF2	NM_017437	7	1	1
OMA1	NM_145243	7	2	2
PGAM5	NM_138575	4	1	2
TMEM14B	NM_030969	4	1	1
C3orf63	NM_001112736	20	18	7
PAX5	NM_016734	4	1	1
ATP7A	NM_000052	5	1	1
FAM73A	NM_198549	6	5	3
SIDT1	NM_017699	17	6	1
CEP70	NM_024491	5	3	3
FNBP4	NM_015308	7	4	1
NFYB	NM_006166	4	2	2
SETX	NM_015046	13	10	2
IFNGR2	NM_005534	5	4	3
XPO1	NM_003400	3	1	7
SFXN5	NM_144579	12	10	2
IQCK	NM_153208	6	4	2
MGEA5	NM_012215	11	3	1
CCT6P1	NR_003110	3	2	1
ATP8B4	NM_024837	6	3	2
ASH2L	NM_001105214	8	5	1
ATM	NM_000051	16	1	4
DCP2	NM_152624	7	1	1
ZCCHC17	NM_016505	6	3	2
FLVCR1	NM_014053	7	1	4
ARPP-21	NM_016300	8	1	1
ROCK1	NM_005406	31	29	1
CLNS1A	NM_001293	3	2	4
UBN2	NM_173569	8	6	1
MELK	NM_014791	16	14	1
BRWD3	NM_153252	21	17	3
PRPF8	NM_006445	11	4	1
FARSA	NM_004461	6	4	8
MPP7	NM_173496	10	5	1
APC	NM_001127511	13	10	1
ARHGEF9	NM_015185	7	4	1
