# Supplementary material for: Circular RNAs Are the Predominant Transcript Isoform from Hundreds of Human Genes in Diverse Cell Types
Source: PLoS One. 2012 Feb 1;7(2):e30733. doi: 10.1371/journal.pone.0030733 (PMC3270023; doi:10.1371/journal.pone.0030733)
Supplement: Table S8 — Table of scrambled exon-exon junctions detected from the public RNA-Seq dataset of ribosomal depleted mouse brain (see Text S1 for more details). (CSV) [file pone.0030733.s012.csv]

readid	junction_strand	exon1	exon2	junction_start	junction_seq	junction_read	junction_mismatch	read_mismatch	readstrand	nm_id	readstart	readseq	genename
SRR029642.13982537	-	4	1	7	TGCTAAGGCTTTCCCAAACAATGTGGCTGCAGTCATGGTGATGACCCTGGAGGA	2	25:A>G	1	+	NM_183116	519	AACTTCCGGAAGGACCGATATTCATTGCCATGTGTTTTCTGGCGAGAATAGTAG	1110021L09Rik
SRR029642.19546702	-	4	1	13	ACAAATGTCTGGCTAATGGCATTTCCAGAAGGCTTCCAGTAATTATCTCCAGGA	2		0	+	NM_001122738	1562	AACATAGAGAAACAGAGTGCACAGTTGACTGAGATCATTAACAGTTTGATTGCC	1110028C15Rik
SRR029642.6096114	-	6	5	8	GCATCAGGCAGAGCACTAAAGGCCTTTTTACTGCTGATAGATAAAAGCCCAGAA	2		0	+	NM_026894	890	GAGAAACAGAGACGTGGAAGAGACTCTGCTGCAGGTGGCTCAGGACCCCGACTG	1500001M20Rik
SRR029642.5119957	+	3	1	33	CAAGCTGCACTTTTCCCACAGTCAGATCACGCGCCTGTACAGCCGCTTCACCAG	2		0	-	NM_019769	294	TTCCAGAGGATTCCAGAACTTGCCATCAACCCACTGGGGGACCGGATCATCAAT	1500003O03Rik
SRR029642.669009	-	6	2	23	CGACCAGGGGTCTGTCTGGAGCTTTGTCTCGGTACAGAGTCTGAAGACCCATCA	2		0	+	NM_001013256	1310	GTTGCATGAGTCTGCCGGCCTCTACATTCTAGATGGGCAGCTGATTCTCTGCCT	1500010J02Rik
SRR029642.10916910	+	6	5	20	ATTCGACCAGGGGTCTGTCTGGAGATCCCTGCTCAGATGGTGTGGCACCGAGTC	2		0	-	NM_001013256	1095	CGGATTCACCTTTCCTGTATTTGGACAACCATTCCATCTTCAACTCTGAAGCCT	1500010J02Rik
SRR029642.11897381	+	3	1	25	AGCACACCAGCGAAGGATGGTGACCTCACTGACCCCGCCCCTGACTCCACCCCT	2		0	-	NR_015551	218	CCTGGAGAAGTCAAAGGACCAGGAGGACGCCATGGGGGGTGCTGTACAGGCTGA	1700012B15Rik
SRR029642.11897381	+	3	1	25	AGCACACCAGCGAAGGATGGTGACCTCACTGACCCCGCCCCTGACTCCACCCCT	2		0	-	NR_015551	219	CTGGAGAAGTCAAAGGACCAGGAGGACGCCATGGGGGGTGCTGTACAGGCTGAG	1700012B15Rik
SRR029642.14680497	-	6	2	30	CGCGGCTCTGCCAGTGACACTAGCAGTGTGTGCAGCAGCAGTGACACGGGGCTC	2	50:T>G,52:A>G	0	+	NM_027405	1134	GGTTACCATCAGCTGGGAAAAGAGAACGGAATCAGTTTAATCCACTCTCCCCTC	1700020O03Rik
SRR029642.11664607	+	4	1	16	NAGAATGCTGGATGAAAAAATCGAAAAGGTGTACACACTGTTACCAGCACAGCC	2	0:C>N	0	-	NM_197990	458	TCCCCGTGTCTGTAGAGATGATTTGCAGTCCAGCCCTGCTGAAGCTGACCGAAT	1700025G04Rik
SRR029642.18248990	-	6	2	14	GCGTTCACCCTGTGCTAGCATTTCCNGATGGAAACGTAGGTCTGAATGGAGATG	2	28:A>N	0	+	NM_001081045	2531	TGTGCACTGTGTGGTTCAGGCAGTGTGAACACCATGCCTCCTGAAATACACTAT	1700081L11Rik
SRR029642.424569	+	6	2	10	TCCTGCGTTCACCCTGTGCTAGCATTTCCAGATGGAAACGTAGGTCTGAATGGA	2		1	-	NM_001081045	2010	CCCAGGTTTCTGACTTGGAATATCGAATTCGTCAGCAAACAGATATTTACAAAC	1700081L11Rik
SRR029642.18248990	-	6	2	14	GCGTTCACCCTGTGCTAGCATTTCCNGATGGAAACGTAGGTCTGAATGGAGATG	2	28:A>N	0	+	NM_001081045	2540	TGTGGTTCAGGCAGTGTGAACACCATGCCTCCTGAAATACACTATGAAGCACCT	1700081L11Rik
SRR029642.19995666	+	6	2	2	AGTTGGACTCCTGCGTTCACCCTGTGCTAGCATTTCCAGATGGAAACGTAGGTC	2		0	-	NM_001081045	2006	CAGGCCCATGTTTCTGACTTGGAATATCGAATTCGTCAGCAAACAGATATTTAC	1700081L11Rik
SRR029642.17793605	-	5	2	2	AGGCGTGTTAGGCCCAGCAGCATCGTTCCTCTTTCTAAGAAGGAAACGTAGGTC	2	49:T>G	0	+	NM_001081045	2540	TGTGGTTCAGGCAGTGTGAACACCATGCCTCCTGAAATACACTATGAAGCACCT	1700081L11Rik
SRR029642.14349664	+	5	2	28	TCCTCTTTCTAAGAAGGAAACGTAGGTCTGAATGGAGATGGGCTGCAGACCGAG	2		0	-	NM_001081045	2006	CAGGCCCATGTTTCTGACTTGGAATATCGAATTCGTCAGCAAACAGATATTTAC	1700081L11Rik
SRR029642.16516652	-	6	2	7	GACTCCTGCGTTCACCCTGTGCTAGCATTTCCAGATGGAAACGTAGGTCTGAAT	2		0	+	NM_001081045	2540	TGTGGTTCAGGCAGTGTGAACACCATGCCTCCTGAAATACACTATGAAGCACCT	1700081L11Rik
SRR029642.15036252	+	6	2	5	TGGACTCCTGCGTTCACCCTGTGCTAGCATTTCCAGATGGAAACGTAGGTCTGA	2		0	-	NM_001081045	2006	CAGGCCCATGTTTCTGACTTGGAATATCGAATTCGTCAGCAAACAGATATTTAC	1700081L11Rik
SRR029642.15241272	-	5	3	12	GGCCCAGCAGCATCGTTCCTCTTTCTAAGAAGGGGTTGATAGTCCTTGGGGAGG	2		0	+	NM_001081045	2540	TGTGGTTCAGGCAGTGTGAACACCATGCCTCCTGAAATACACTATGAAGCACCT	1700081L11Rik
SRR029642.18696083	+	6	2	8	ACTCCTGCGTTCACCCTGTGCTAGCATTTCCAGATGGAAACGTAGGTCTGAATG	2		0	-	NM_001081045	2006	CAGGCCCATGTTTCTGACTTGGAATATCGAATTCGTCAGCAAACAGATATTTAC	1700081L11Rik
SRR029642.11034420	-	5	2	5	CTTGTTAGGCCCAGCAGCATCGTTCCTCTTTCTAAGAAGGAAACGTAGGTCTGA	2		0	+	NM_001081045	2540	TGTGGTTCAGGCAGTGTGAACACCATGCCTCCTGAAATACACTATGAAGCACCT	1700081L11Rik
SRR029642.7231016	+	6	2	14	GCGTTCACCCTGTGCTAGCATTTCCAGATGGAAACGTAGGTCTGAATGGAGATG	2		0	-	NM_001081045	2006	CAGGCCCATGTTTCTGACTTGGAATATCGAATTCGTCAGCAAACAGATATTTAC	1700081L11Rik
SRR029642.7672546	-	6	2	12	CTGCGTTCACCCTGTGCTAGCATTTCCAGATGGAAACGTAGGTCTGAATGGAGA	2		0	+	NM_001081045	2540	TGTGGTTCAGGCAGTGTGAACACCATGCCTCCTGAAATACACTATGAAGCACCT	1700081L11Rik
SRR029642.8508967	+	5	2	18	GCAGCATCGTTCCTCTTTCTAAGAAGGAAACGTAGGTCTGAATGGAGATGGGCT	2		0	-	NM_001081045	2006	CAGGCCCATGTTTCTGACTTGGAATATCGAATTCGTCAGCAAACAGATATTTAC	1700081L11Rik
SRR029642.5835018	-	6	2	32	CATTTCCAGATGGAAACGTAGGTCTGAATGGAGATGGGCTGCAGACCGAGCAGC	2		0	+	NM_001081045	2540	TGTGGTTCAGGCAGTGTGAACACCATGCCTCCTGAAATACACTATGAAGCACCT	1700081L11Rik
SRR029642.12623189	+	6	2	2	AGTTGGACTCCTGCGTTCACCCTGTGCTAGCATTTCCAGATGGAAACGTAGGTC	2		0	-	NM_001081045	2006	CAGGCCCATGTTTCTGACTTGGAATATCGAATTCGTCAGCAAACAGATATTTAC	1700081L11Rik
SRR029642.3643965	-	6	4	21	CCCTGTGCTAGCATTTCCAGATGATTGAGTCTGTTTCTCAGCCATCAGAAAACC	2		0	+	NM_001081045	2540	TGTGGTTCAGGCAGTGTGAACACCATGCCTCCTGAAATACACTATGAAGCACCT	1700081L11Rik
SRR029642.10373941	+	1	1	24	GAGCAATGCCATGTGCCCCTTGTGTTCTCAGGGGAGGCAGCAAGGGGCCGTGGG	2	53:A>G	0	-	NM_001081045	2006	CAGGCCCATGTTTCTGACTTGGAATATCGAATTCGTCAGCAAACAGATATTTAC	1700081L11Rik
SRR029642.17877528	-	6	2	32	CATTTCCAGATGGAAACGTAGGTCTGAATGGAGATGGGCTGCAGACCGAGCAGC	2		0	+	NM_001081045	2540	TGTGGTTCAGGCAGTGTGAACACCATGCCTCCTGAAATACACTATGAAGCACCT	1700081L11Rik
SRR029642.9955317	+	6	2	17	TTCACCCTGTGCTAGCATTTCCAGATGGAAACGTAGGTCTGAATGGAGATGGGC	2		0	-	NM_001081045	2006	CAGGCCCATGTTTCTGACTTGGAATATCGAATTCGTCAGCAAACAGATATTTAC	1700081L11Rik
SRR029642.17877528	-	6	2	32	CATTTCCAGATGGAAACGTAGGTCTGAATGGAGATGGGCTGCAGACCGAGCAGC	2		0	+	NM_001081045	2531	TGTGCACTGTGTGGTTCAGGCAGTGTGAACACCATGCCTCCTGAAATACACTAT	1700081L11Rik
SRR029642.10955753	+	5	2	18	GCAGCATCGTTCCTCTTTCTAAGCAGGAAACGTAGGTCTGAATGGAGATGGGCT	2	23:A>C	0	-	NM_001081045	2006	CAGGCCCATGTTTCTGACTTGGAATATCGAATTCGTCAGCAAACAGATATTTAC	1700081L11Rik
SRR029642.17793605	-	5	2	2	AGGCGTGTTAGGCCCAGCAGCATCGTTCCTCTTTCTAAGAAGGAAACGTAGGTC	2	49:T>G	0	+	NM_001081045	2531	TGTGCACTGTGTGGTTCAGGCAGTGTGAACACCATGCCTCCTGAAATACACTAT	1700081L11Rik
SRR029642.10955753	+	5	2	18	GCAGCATCGTTCCTCTTTCTAAGCAGGAAACGTAGGTCTGAATGGAGATGGGCT	2	23:A>C	0	-	NM_001081045	1987	CAGCCGCTGGAACTGGCTTCAGGCCCATGTTTCTGACTTGGAATATCGAATTCG	1700081L11Rik
SRR029642.15241272	-	5	3	12	GGCCCAGCAGCATCGTTCCTCTTTCTAAGAAGGGGTTGATAGTCCTTGGGGAGG	2		0	+	NM_001081045	2531	TGTGCACTGTGTGGTTCAGGCAGTGTGAACACCATGCCTCCTGAAATACACTAT	1700081L11Rik
SRR029642.9955317	+	6	2	17	TTCACCCTGTGCTAGCATTTCCAGATGGAAACGTAGGTCTGAATGGAGATGGGC	2		1	-	NM_001081045	2010	CCCATTTTTCTGACTTGGAATATCGAATTCGTCAGCAAACAGATATTTACAAAC	1700081L11Rik
SRR029642.11034420	-	5	2	5	CTTGTTAGGCCCAGCAGCATCGTTCCTCTTTCTAAGAAGGAAACGTAGGTCTGA	2		0	+	NM_001081045	2531	TGTGCACTGTGTGGTTCAGGCAGTGTGAACACCATGCCTCCTGAAATACACTAT	1700081L11Rik
SRR029642.1300656	+	6	2	6	GGACTCCTGCGTTCACCCTGTGCTAGCATTTCCAGATGGAAACGTAGGTCTGAA	2		1	-	NM_001081045	1994	TGGAACTGGCTNCAGGCCCATGTTTCTGACTTGGAATATCGAATTCGTCAGCAA	1700081L11Rik
SRR029642.7672546	-	6	2	12	CTGCGTTCACCCTGTGCTAGCATTTCCAGATGGAAACGTAGGTCTGAATGGAGA	2		0	+	NM_001081045	2531	TGTGCACTGTGTGGTTCAGGCAGTGTGAACACCATGCCTCCTGAAATACACTAT	1700081L11Rik
SRR029642.6053216	+	3	2	24	ATCATGGGAGAGATAAATTGGAAACGTAGGTCTGAATGGAGATGGGCTGCAGAC	2		0	-	NM_001081045	2006	CAGGCCCATGTTTCTGACTTGGAATATCGAATTCGTCAGCAAACAGATATTTAC	1700081L11Rik
SRR029642.5835018	-	6	2	32	CATTTCCAGATGGAAACGTAGGTCTGAATGGAGATGGGCTGCAGACCGAGCAGC	2		0	+	NM_001081045	2531	TGTGCACTGTGTGGTTCAGGCAGTGTGAACACCATGCCTCCTGAAATACACTAT	1700081L11Rik
SRR029642.1300656	+	6	2	6	GGACTCCTGCGTTCACCCTGTGCTAGCATTTCCAGATGGAAACGTAGGTCTGAA	2		2	-	NM_001081045	2010	CCCATTTTTCTTACTTGGAATATCGAATTCGTCAGCAAACAGATATTTACAAAC	1700081L11Rik
SRR029642.3643965	-	6	4	21	CCCTGTGCTAGCATTTCCAGATGATTGAGTCTGTTTCTCAGCCATCAGAAAACC	2		0	+	NM_001081045	2531	TGTGCACTGTGTGGTTCAGGCAGTGTGAACACCATGCCTCCTGAAATACACTAT	1700081L11Rik
SRR029642.18696083	+	6	2	8	ACTCCTGCGTTCACCCTGTGCTAGCATTTCCAGATGGAAACGTAGGTCTGAATG	2		1	-	NM_001081045	1994	TGGAACTGGCTNCAGGCCCATGTTTCTGACTTGGAATATCGAATTCGTCAGCAA	1700081L11Rik
SRR029642.16516652	-	6	2	7	GACTCCTGCGTTCACCCTGTGCTAGCATTTCCAGATGGAAACGTAGGTCTGAAT	2		0	+	NM_001081045	2531	TGTGCACTGTGTGGTTCAGGCAGTGTGAACACCATGCCTCCTGAAATACACTAT	1700081L11Rik
SRR029642.3643965	-	6	4	21	CCCTGTGCTAGCATTTCCAGATGATTGAGTCTGTTTCTCAGCCATCAGAAAACC	2		0	+	NM_001081045	2540	TGTGGTTCAGGCAGTGTGAACACCATGCCTCCTGAAATACACTATGAAGCACCT	1700081L11Rik
SRR029642.18248990	-	6	2	14	GCGTTCACCCTGTGCTAGCATTTCCNGATGGAAACGTAGGTCTGAATGGAGATG	2	28:A>N	0	+	NM_001081045	2522	AATCCCTCTTGTGCACTGTGTGGTTCAGGCAGTGTGAACACCATGCCTCCTGAA	1700081L11Rik
SRR029642.1553629	+	6	2	2	AGTTGGACTCCTGCGTTCACCCTGTGCTAGCATTTCCAGATGGAAACGTAGGTC	2		1	-	NM_001081045	1994	TGGAACTGGCTNCAGGCCCATGTTTCTGACTTGGAATATCGAATTCGTCAGCAA	1700081L11Rik
SRR029642.17877528	-	6	2	32	CATTTCCAGATGGAAACGTAGGTCTGAATGGAGATGGGCTGCAGACCGAGCAGC	2		0	+	NM_001081045	2522	AATCCCTCTTGTGCACTGTGTGGTTCAGGCAGTGTGAACACCATGCCTCCTGAA	1700081L11Rik
SRR029642.18696083	+	6	2	8	ACTCCTGCGTTCACCCTGTGCTAGCATTTCCAGATGGAAACGTAGGTCTGAATG	2		0	-	NM_001081045	638	TCTCTGTGCTGAATGGCTGCGATGGCGCCCGCTCTCACTGACGCAGCAGCTGAA	1700081L11Rik
SRR029642.17793605	-	5	2	2	AGGCGTGTTAGGCCCAGCAGCATCGTTCCTCTTTCTAAGAAGGAAACGTAGGTC	2	49:T>G	0	+	NM_001081045	2522	AATCCCTCTTGTGCACTGTGTGGTTCAGGCAGTGTGAACACCATGCCTCCTGAA	1700081L11Rik
SRR029642.19995666	+	6	2	2	AGTTGGACTCCTGCGTTCACCCTGTGCTAGCATTTCCAGATGGAAACGTAGGTC	2		1	-	NM_001081045	1994	TGGAACTGGCTNCAGGCCCATGTTTCTGACTTGGAATATCGAATTCGTCAGCAA	1700081L11Rik
SRR029642.16516652	-	6	2	7	GACTCCTGCGTTCACCCTGTGCTAGCATTTCCAGATGGAAACGTAGGTCTGAAT	2		0	+	NM_001081045	2522	AATCCCTCTTGTGCACTGTGTGGTTCAGGCAGTGTGAACACCATGCCTCCTGAA	1700081L11Rik
SRR029642.5835018	-	6	2	32	CATTTCCAGATGGAAACGTAGGTCTGAATGGAGATGGGCTGCAGACCGAGCAGC	2		0	+	NM_001081045	2540	TGTGGTTCAGGCAGTGTGAACACCATGCCTCCTGAAATACACTATGAAGCACCT	1700081L11Rik
SRR029642.15241272	-	5	3	12	GGCCCAGCAGCATCGTTCCTCTTTCTAAGAAGGGGTTGATAGTCCTTGGGGAGG	2		0	+	NM_001081045	2522	AATCCCTCTTGTGCACTGTGTGGTTCAGGCAGTGTGAACACCATGCCTCCTGAA	1700081L11Rik
SRR029642.15036252	+	6	2	5	TGGACTCCTGCGTTCACCCTGTGCTAGCATTTCCAGATGGAAACGTAGGTCTGA	2		1	-	NM_001081045	1994	TGGAACTGGCTNCAGGCCCATGTTTCTGACTTGGAATATCGAATTCGTCAGCAA	1700081L11Rik
SRR029642.11034420	-	5	2	5	CTTGTTAGGCCCAGCAGCATCGTTCCTCTTTCTAAGAAGGAAACGTAGGTCTGA	2		0	+	NM_001081045	2522	AATCCCTCTTGTGCACTGTGTGGTTCAGGCAGTGTGAACACCATGCCTCCTGAA	1700081L11Rik
SRR029642.10373941	+	1	1	24	GAGCAATGCCATGTGCCCCTTGTGTTCTCAGGGGAGGCAGCAAGGGGCCGTGGG	2	53:A>G	1	-	NM_001081045	1994	TGGAACTGGCTNCAGGCCCATGTTTCTGACTTGGAATATCGAATTCGTCAGCAA	1700081L11Rik
SRR029642.7672546	-	6	2	12	CTGCGTTCACCCTGTGCTAGCATTTCCAGATGGAAACGTAGGTCTGAATGGAGA	2		0	+	NM_001081045	2522	AATCCCTCTTGTGCACTGTGTGGTTCAGGCAGTGTGAACACCATGCCTCCTGAA	1700081L11Rik
SRR029642.10955753	+	5	2	18	GCAGCATCGTTCCTCTTTCTAAGCAGGAAACGTAGGTCTGAATGGAGATGGGCT	2	23:A>C	1	-	NM_001081045	1994	TGGAACTGGCTNCAGGCCCATGTTTCTGACTTGGAATATCGAATTCGTCAGCAA	1700081L11Rik
SRR029642.5835018	-	6	2	32	CATTTCCAGATGGAAACGTAGGTCTGAATGGAGATGGGCTGCAGACCGAGCAGC	2		0	+	NM_001081045	2522	AATCCCTCTTGTGCACTGTGTGGTTCAGGCAGTGTGAACACCATGCCTCCTGAA	1700081L11Rik
SRR029642.14349664	+	5	2	28	TCCTCTTTCTAAGAAGGAAACGTAGGTCTGAATGGAGATGGGCTGCAGACCGAG	2		1	-	NM_001081045	1994	TGGAACTGGCTNCAGGCCCATGTTTCTGACTTGGAATATCGAATTCGTCAGCAA	1700081L11Rik
SRR029642.3643965	-	6	4	21	CCCTGTGCTAGCATTTCCAGATGATTGAGTCTGTTTCTCAGCCATCAGAAAACC	2		0	+	NM_001081045	2522	AATCCCTCTTGTGCACTGTGTGGTTCAGGCAGTGTGAACACCATGCCTCCTGAA	1700081L11Rik
SRR029642.1553629	+	6	2	2	AGTTGGACTCCTGCGTTCACCCTGTGCTAGCATTTCCAGATGGAAACGTAGGTC	2		0	-	NM_001081045	2006	CAGGCCCATGTTTCTGACTTGGAATATCGAATTCGTCAGCAAACAGATATTTAC	1700081L11Rik
SRR029642.18248990	-	6	2	14	GCGTTCACCCTGTGCTAGCATTTCCNGATGGAAACGTAGGTCTGAATGGAGATG	2	28:A>N	0	+	NM_001081045	2361	AAAAGCAAAGGCTGAATTTAGTTTCTTCATCTGATGGCACGTGTGTCGCAGCCC	1700081L11Rik
SRR029642.2072198	+	6	2	33	ATTTCCAGATGGAAACGTAGGTCTGAATGGAGATGGGCTGCAGACCGAGCAGCT	2		0	-	NM_001081045	2006	CAGGCCCATGTTTCTGACTTGGAATATCGAATTCGTCAGCAAACAGATATTTAC	1700081L11Rik
SRR029642.17877528	-	6	2	32	CATTTCCAGATGGAAACGTAGGTCTGAATGGAGATGGGCTGCAGACCGAGCAGC	2		0	+	NM_001081045	2361	AAAAGCAAAGGCTGAATTTAGTTTCTTCATCTGATGGCACGTGTGTCGCAGCCC	1700081L11Rik
SRR029642.12623189	+	6	2	2	AGTTGGACTCCTGCGTTCACCCTGTGCTAGCATTTCCAGATGGAAACGTAGGTC	2		1	-	NM_001081045	1994	TGGAACTGGCTNCAGGCCCATGTTTCTGACTTGGAATATCGAATTCGTCAGCAA	1700081L11Rik
SRR029642.17793605	-	5	2	2	AGGCGTGTTAGGCCCAGCAGCATCGTTCCTCTTTCTAAGAAGGAAACGTAGGTC	2	49:T>G	0	+	NM_001081045	2361	AAAAGCAAAGGCTGAATTTAGTTTCTTCATCTGATGGCACGTGTGTCGCAGCCC	1700081L11Rik
SRR029642.2411247	+	5	2	28	TCCTCTTTCTAAGAAGGAAACGTAGGTCTGAATGGAGATGGGCTGCAGACCGAG	2		0	-	NM_001081045	2006	CAGGCCCATGTTTCTGACTTGGAATATCGAATTCGTCAGCAAACAGATATTTAC	1700081L11Rik
SRR029642.16516652	-	6	2	7	GACTCCTGCGTTCACCCTGTGCTAGCATTTCCAGATGGAAACGTAGGTCTGAAT	2		0	+	NM_001081045	2361	AAAAGCAAAGGCTGAATTTAGTTTCTTCATCTGATGGCACGTGTGTCGCAGCCC	1700081L11Rik
SRR029642.2072198	+	6	2	33	ATTTCCAGATGGAAACGTAGGTCTGAATGGAGATGGGCTGCAGACCGAGCAGCT	2		0	-	NM_001081045	2009	GCCCATGTTTCTGACTTGGAATATCGAATTCGTCAGCAAACAGATATTTACAAA	1700081L11Rik
SRR029642.15241272	-	5	3	12	GGCCCAGCAGCATCGTTCCTCTTTCTAAGAAGGGGTTGATAGTCCTTGGGGAGG	2		0	+	NM_001081045	2361	AAAAGCAAAGGCTGAATTTAGTTTCTTCATCTGATGGCACGTGTGTCGCAGCCC	1700081L11Rik
SRR029642.2072198	+	6	2	33	ATTTCCAGATGGAAACGTAGGTCTGAATGGAGATGGGCTGCAGACCGAGCAGCT	2		1	-	NM_001081045	1994	TGGAACTGGCTNCAGGCCCATGTTTCTGACTTGGAATATCGAATTCGTCAGCAA	1700081L11Rik
SRR029642.11034420	-	5	2	5	CTTGTTAGGCCCAGCAGCATCGTTCCTCTTTCTAAGAAGGAAACGTAGGTCTGA	2		0	+	NM_001081045	2361	AAAAGCAAAGGCTGAATTTAGTTTCTTCATCTGATGGCACGTGTGTCGCAGCCC	1700081L11Rik
SRR029642.17793605	-	5	2	2	AGGCGTGTTAGGCCCAGCAGCATCGTTCCTCTTTCTAAGAAGGAAACGTAGGTC	2	49:T>G	0	+	NM_001081045	2540	TGTGGTTCAGGCAGTGTGAACACCATGCCTCCTGAAATACACTATGAAGCACCT	1700081L11Rik
SRR029642.7672546	-	6	2	12	CTGCGTTCACCCTGTGCTAGCATTTCCAGATGGAAACGTAGGTCTGAATGGAGA	2		0	+	NM_001081045	2361	AAAAGCAAAGGCTGAATTTAGTTTCTTCATCTGATGGCACGTGTGTCGCAGCCC	1700081L11Rik
SRR029642.17877528	-	6	2	32	CATTTCCAGATGGAAACGTAGGTCTGAATGGAGATGGGCTGCAGACCGAGCAGC	2		0	+	NM_001081045	2540	TGTGGTTCAGGCAGTGTGAACACCATGCCTCCTGAAATACACTATGAAGCACCT	1700081L11Rik
SRR029642.5835018	-	6	2	32	CATTTCCAGATGGAAACGTAGGTCTGAATGGAGATGGGCTGCAGACCGAGCAGC	2		0	+	NM_001081045	2361	AAAAGCAAAGGCTGAATTTAGTTTCTTCATCTGATGGCACGTGTGTCGCAGCCC	1700081L11Rik
SRR029642.8508967	+	5	2	18	GCAGCATCGTTCCTCTTTCTAAGAAGGAAACGTAGGTCTGAATGGAGATGGGCT	2		1	-	NM_001081045	1994	TGGAACTGGCTNCAGGCCCATGTTTCTGACTTGGAATATCGAATTCGTCAGCAA	1700081L11Rik
SRR029642.3643965	-	6	4	21	CCCTGTGCTAGCATTTCCAGATGATTGAGTCTGTTTCTCAGCCATCAGAAAACC	2		0	+	NM_001081045	2361	AAAAGCAAAGGCTGAATTTAGTTTCTTCATCTGATGGCACGTGTGTCGCAGCCC	1700081L11Rik
SRR029642.19995666	+	6	2	2	AGTTGGACTCCTGCGTTCACCCTGTGCTAGCATTTCCAGATGGAAACGTAGGTC	2		0	-	NM_001081045	2009	GCCCATGTTTCTGACTTGGAATATCGAATTCGTCAGCAAACAGATATTTACAAA	1700081L11Rik
SRR029642.18248990	-	6	2	14	GCGTTCACCCTGTGCTAGCATTTCCNGATGGAAACGTAGGTCTGAATGGAGATG	2	28:A>N	0	+	NM_001081045	2358	ATAAAAAGCAAAGGCTGAATTTAGTTTCTTCATCTGATGGCACGTGTGTCGCAG	1700081L11Rik
SRR029642.9955317	+	6	2	17	TTCACCCTGTGCTAGCATTTCCAGATGGAAACGTAGGTCTGAATGGAGATGGGC	2		1	-	NM_001081045	1994	TGGAACTGGCTNCAGGCCCATGTTTCTGACTTGGAATATCGAATTCGTCAGCAA	1700081L11Rik
SRR029642.18248990	-	6	2	14	GCGTTCACCCTGTGCTAGCATTTCCNGATGGAAACGTAGGTCTGAATGGAGATG	2	28:A>N	0	+	NM_001081045	2519	GTGAATCCCTCTTGTGCACTGTGTGGTTCAGGCAGTGTGAACACCATGCCTCCT	1700081L11Rik
SRR029642.11034420	-	5	2	5	CTTGTTAGGCCCAGCAGCATCGTTCCTCTTTCTAAGAAGGAAACGTAGGTCTGA	2		0	+	NM_001081045	2540	TGTGGTTCAGGCAGTGTGAACACCATGCCTCCTGAAATACACTATGAAGCACCT	1700081L11Rik
SRR029642.17877528	-	6	2	32	CATTTCCAGATGGAAACGTAGGTCTGAATGGAGATGGGCTGCAGACCGAGCAGC	2		0	+	NM_001081045	2519	GTGAATCCCTCTTGTGCACTGTGTGGTTCAGGCAGTGTGAACACCATGCCTCCT	1700081L11Rik
SRR029642.7672546	-	6	2	12	CTGCGTTCACCCTGTGCTAGCATTTCCAGATGGAAACGTAGGTCTGAATGGAGA	2		0	+	NM_001081045	2540	TGTGGTTCAGGCAGTGTGAACACCATGCCTCCTGAAATACACTATGAAGCACCT	1700081L11Rik
SRR029642.17793605	-	5	2	2	AGGCGTGTTAGGCCCAGCAGCATCGTTCCTCTTTCTAAGAAGGAAACGTAGGTC	2	49:T>G	0	+	NM_001081045	2519	GTGAATCCCTCTTGTGCACTGTGTGGTTCAGGCAGTGTGAACACCATGCCTCCT	1700081L11Rik
SRR029642.1300656	+	6	2	6	GGACTCCTGCGTTCACCCTGTGCTAGCATTTCCAGATGGAAACGTAGGTCTGAA	2		0	-	NM_001081045	2006	CAGGCCCATGTTTCTGACTTGGAATATCGAATTCGTCAGCAAACAGATATTTAC	1700081L11Rik
SRR029642.16516652	-	6	2	7	GACTCCTGCGTTCACCCTGTGCTAGCATTTCCAGATGGAAACGTAGGTCTGAAT	2		0	+	NM_001081045	2519	GTGAATCCCTCTTGTGCACTGTGTGGTTCAGGCAGTGTGAACACCATGCCTCCT	1700081L11Rik
SRR029642.424569	+	6	2	10	TCCTGCGTTCACCCTGTGCTAGCATTTCCAGATGGAAACGTAGGTCTGAATGGA	2		0	-	NM_001081045	2006	CAGGCCCATGTTTCTGACTTGGAATATCGAATTCGTCAGCAAACAGATATTTAC	1700081L11Rik
SRR029642.15241272	-	5	3	12	GGCCCAGCAGCATCGTTCCTCTTTCTAAGAAGGGGTTGATAGTCCTTGGGGAGG	2		0	+	NM_001081045	2519	GTGAATCCCTCTTGTGCACTGTGTGGTTCAGGCAGTGTGAACACCATGCCTCCT	1700081L11Rik
SRR029642.6053216	+	3	2	24	ATCATGGGAGAGATAAATTGGAAACGTAGGTCTGAATGGAGATGGGCTGCAGAC	2		1	-	NM_001081045	1994	TGGAACTGGCTNCAGGCCCATGTTTCTGACTTGGAATATCGAATTCGTCAGCAA	1700081L11Rik
SRR029642.11034420	-	5	2	5	CTTGTTAGGCCCAGCAGCATCGTTCCTCTTTCTAAGAAGGAAACGTAGGTCTGA	2		0	+	NM_001081045	2519	GTGAATCCCTCTTGTGCACTGTGTGGTTCAGGCAGTGTGAACACCATGCCTCCT	1700081L11Rik
SRR029642.7231016	+	6	2	14	GCGTTCACCCTGTGCTAGCATTTCCAGATGGAAACGTAGGTCTGAATGGAGATG	2		1	-	NM_001081045	1994	TGGAACTGGCTNCAGGCCCATGTTTCTGACTTGGAATATCGAATTCGTCAGCAA	1700081L11Rik
SRR029642.7672546	-	6	2	12	CTGCGTTCACCCTGTGCTAGCATTTCCAGATGGAAACGTAGGTCTGAATGGAGA	2		0	+	NM_001081045	2519	GTGAATCCCTCTTGTGCACTGTGTGGTTCAGGCAGTGTGAACACCATGCCTCCT	1700081L11Rik
SRR029642.2411247	+	5	2	28	TCCTCTTTCTAAGAAGGAAACGTAGGTCTGAATGGAGATGGGCTGCAGACCGAG	2		1	-	NM_001081045	1994	TGGAACTGGCTNCAGGCCCATGTTTCTGACTTGGAATATCGAATTCGTCAGCAA	1700081L11Rik
SRR029642.5835018	-	6	2	32	CATTTCCAGATGGAAACGTAGGTCTGAATGGAGATGGGCTGCAGACCGAGCAGC	2		0	+	NM_001081045	2519	GTGAATCCCTCTTGTGCACTGTGTGGTTCAGGCAGTGTGAACACCATGCCTCCT	1700081L11Rik
SRR029642.424569	+	6	2	10	TCCTGCGTTCACCCTGTGCTAGCATTTCCAGATGGAAACGTAGGTCTGAATGGA	2		1	-	NM_001081045	1994	TGGAACTGGCTNCAGGCCCATGTTTCTGACTTGGAATATCGAATTCGTCAGCAA	1700081L11Rik
SRR029642.3643965	-	6	4	21	CCCTGTGCTAGCATTTCCAGATGATTGAGTCTGTTTCTCAGCCATCAGAAAACC	2		0	+	NM_001081045	2519	GTGAATCCCTCTTGTGCACTGTGTGGTTCAGGCAGTGTGAACACCATGCCTCCT	1700081L11Rik
SRR029642.15036252	+	6	2	5	TGGACTCCTGCGTTCACCCTGTGCTAGCATTTCCAGATGGAAACGTAGGTCTGA	2		0	-	NM_001081045	638	TCTCTGTGCTGAATGGCTGCGATGGCGCCCGCTCTCACTGACGCAGCAGCTGAA	1700081L11Rik
SRR029642.17877528	-	6	2	32	CATTTCCAGATGGAAACGTAGGTCTGAATGGAGATGGGCTGCAGACCGAGCAGC	2		0	+	NM_001081045	2358	ATAAAAAGCAAAGGCTGAATTTAGTTTCTTCATCTGATGGCACGTGTGTCGCAG	1700081L11Rik
SRR029642.18696083	+	6	2	8	ACTCCTGCGTTCACCCTGTGCTAGCATTTCCAGATGGAAACGTAGGTCTGAATG	2		0	-	NM_001081045	2009	GCCCATGTTTCTGACTTGGAATATCGAATTCGTCAGCAAACAGATATTTACAAA	1700081L11Rik
SRR029642.17793605	-	5	2	2	AGGCGTGTTAGGCCCAGCAGCATCGTTCCTCTTTCTAAGAAGGAAACGTAGGTC	2	49:T>G	0	+	NM_001081045	2358	ATAAAAAGCAAAGGCTGAATTTAGTTTCTTCATCTGATGGCACGTGTGTCGCAG	1700081L11Rik
SRR029642.10955753	+	5	2	18	GCAGCATCGTTCCTCTTTCTAAGCAGGAAACGTAGGTCTGAATGGAGATGGGCT	2	23:A>C	1	-	NM_001081045	2010	CCCAGGTTTCTGACTTGGAATATCGAATTCGTCAGCAAACAGATATTTACAAAC	1700081L11Rik
SRR029642.16516652	-	6	2	7	GACTCCTGCGTTCACCCTGTGCTAGCATTTCCAGATGGAAACGTAGGTCTGAAT	2		0	+	NM_001081045	2358	ATAAAAAGCAAAGGCTGAATTTAGTTTCTTCATCTGATGGCACGTGTGTCGCAG	1700081L11Rik
SRR029642.7231016	+	6	2	14	GCGTTCACCCTGTGCTAGCATTTCCAGATGGAAACGTAGGTCTGAATGGAGATG	2		1	-	NM_001081045	1987	CAGCCGCTGGAACTGGCTTCAGGCCCATGTTTCTGACTGGGAATATCGAATTCG	1700081L11Rik
SRR029642.15241272	-	5	3	12	GGCCCAGCAGCATCGTTCCTCTTTCTAAGAAGGGGTTGATAGTCCTTGGGGAGG	2		0	+	NM_001081045	2358	ATAAAAAGCAAAGGCTGAATTTAGTTTCTTCATCTGATGGCACGTGTGTCGCAG	1700081L11Rik
SRR029642.2411247	+	5	2	28	TCCTCTTTCTAAGAAGGAAACGTAGGTCTGAATGGAGATGGGCTGCAGACCGAG	2		0	-	NM_001081045	1989	GCCGCTGGAACTGGCTTCAGGCCCATGTTTCTGACTTGGAATATCGAATTCGTC	1700081L11Rik
SRR029642.11034420	-	5	2	5	CTTGTTAGGCCCAGCAGCATCGTTCCTCTTTCTAAGAAGGAAACGTAGGTCTGA	2		0	+	NM_001081045	2358	ATAAAAAGCAAAGGCTGAATTTAGTTTCTTCATCTGATGGCACGTGTGTCGCAG	1700081L11Rik
SRR029642.6053216	+	3	2	24	ATCATGGGAGAGATAAATTGGAAACGTAGGTCTGAATGGAGATGGGCTGCAGAC	2		1	-	NM_001081045	2010	CCCATTTTTCTGACTTGGAATATCGAATTCGTCAGCAAACAGATATTTACAAAC	1700081L11Rik
SRR029642.7672546	-	6	2	12	CTGCGTTCACCCTGTGCTAGCATTTCCAGATGGAAACGTAGGTCTGAATGGAGA	2		0	+	NM_001081045	2358	ATAAAAAGCAAAGGCTGAATTTAGTTTCTTCATCTGATGGCACGTGTGTCGCAG	1700081L11Rik
SRR029642.7231016	+	6	2	14	GCGTTCACCCTGTGCTAGCATTTCCAGATGGAAACGTAGGTCTGAATGGAGATG	2		2	-	NM_001081045	2010	CCCATTTTTCTTACTTGGAATATCGAATTCGTCAGCAAACAGATATTTACAAAC	1700081L11Rik
SRR029642.5835018	-	6	2	32	CATTTCCAGATGGAAACGTAGGTCTGAATGGAGATGGGCTGCAGACCGAGCAGC	2		0	+	NM_001081045	2358	ATAAAAAGCAAAGGCTGAATTTAGTTTCTTCATCTGATGGCACGTGTGTCGCAG	1700081L11Rik
SRR029642.15036252	+	6	2	5	TGGACTCCTGCGTTCACCCTGTGCTAGCATTTCCAGATGGAAACGTAGGTCTGA	2		0	-	NM_001081045	1994	TGGAACTGGCTTCAGGCCCATGTTTCTGACTTGGAATATCGAATTCGTCAGCAA	1700081L11Rik
SRR029642.3643965	-	6	4	21	CCCTGTGCTAGCATTTCCAGATGATTGAGTCTGTTTCTCAGCCATCAGAAAACC	2		0	+	NM_001081045	2358	ATAAAAAGCAAAGGCTGAATTTAGTTTCTTCATCTGATGGCACGTGTGTCGCAG	1700081L11Rik
SRR029642.12623189	+	6	2	2	AGTTGGACTCCTGCGTTCACCCTGTGCTAGCATTTCCAGATGGAAACGTAGGTC	2		1	-	NM_001081045	2010	CCCATTTTTCTGACTTGGAATATCGAATTCGTCAGCAAACAGATATTTACAAAC	1700081L11Rik
SRR029642.19995666	+	6	2	2	AGTTGGACTCCTGCGTTCACCCTGTGCTAGCATTTCCAGATGGAAACGTAGGTC	2		1	-	NM_001081045	2010	CCCATTTTTCTGACTTGGAATATCGAATTCGTCAGCAAACAGATATTTACAAAC	1700081L11Rik
SRR029642.18696083	+	6	2	8	ACTCCTGCGTTCACCCTGTGCTAGCATTTCCAGATGGAAACGTAGGTCTGAATG	2		0	-	NM_001081045	1994	TGGAACTGGCTTCAGGCCCATGTTTCTGACTTGGAATATCGAATTCGTCAGCAA	1700081L11Rik
SRR029642.14349664	+	5	2	28	TCCTCTTTCTAAGAAGGAAACGTAGGTCTGAATGGAGATGGGCTGCAGACCGAG	2		1	-	NM_001081045	2010	CCCATTTTTCTGACTTGGAATATCGAATTCGTCAGCAAACAGATATTTACAAAC	1700081L11Rik
SRR029642.19995666	+	6	2	2	AGTTGGACTCCTGCGTTCACCCTGTGCTAGCATTTCCAGATGGAAACGTAGGTC	2		0	-	NM_001081045	1994	TGGAACTGGCTTCAGGCCCATGTTTCTGACTTGGAATATCGAATTCGTCAGCAA	1700081L11Rik
SRR029642.2411247	+	5	2	28	TCCTCTTTCTAAGAAGGAAACGTAGGTCTGAATGGAGATGGGCTGCAGACCGAG	2		0	-	NM_001081045	1987	CAGCCGCTGGAACTGGCTTCAGGCCCATGTTTCTGACTTGGAATATCGAATTCG	1700081L11Rik
SRR029642.18696083	+	6	2	8	ACTCCTGCGTTCACCCTGTGCTAGCATTTCCAGATGGAAACGTAGGTCTGAATG	2		1	-	NM_001081045	2010	CCCATTTTTCTGACTTGGAATATCGAATTCGTCAGCAAACAGATATTTACAAAC	1700081L11Rik
SRR029642.8508967	+	5	2	18	GCAGCATCGTTCCTCTTTCTAAGAAGGAAACGTAGGTCTGAATGGAGATGGGCT	2		1	-	NM_001081045	2010	CCCATTTTTCTGACTTGGAATATCGAATTCGTCAGCAAACAGATATTTACAAAC	1700081L11Rik
SRR029642.2411247	+	5	2	28	TCCTCTTTCTAAGAAGGAAACGTAGGTCTGAATGGAGATGGGCTGCAGACCGAG	2		0	-	NM_001081045	2009	GCCCATGTTTCTGACTTGGAATATCGAATTCGTCAGCAAACAGATATTTACAAA	1700081L11Rik
SRR029642.12623189	+	6	2	2	AGTTGGACTCCTGCGTTCACCCTGTGCTAGCATTTCCAGATGGAAACGTAGGTC	2		0	-	NM_001081045	1987	CAGCCGCTGGAACTGGCTTCAGGCCCATGTTTCTGACTTGGAATATCGAATTCG	1700081L11Rik
SRR029642.15036252	+	6	2	5	TGGACTCCTGCGTTCACCCTGTGCTAGCATTTCCAGATGGAAACGTAGGTCTGA	2		0	-	NM_001081045	1987	CAGCCGCTGGAACTGGCTTCAGGCCCATGTTTCTGACTTGGAATATCGAATTCG	1700081L11Rik
SRR029642.14349664	+	5	2	28	TCCTCTTTCTAAGAAGGAAACGTAGGTCTGAATGGAGATGGGCTGCAGACCGAG	2		0	-	NM_001081045	638	TCTCTGTGCTGAATGGCTGCGATGGCGCCCGCTCTCACTGACGCAGCAGCTGAA	1700081L11Rik
SRR029642.14349664	+	5	2	28	TCCTCTTTCTAAGAAGGAAACGTAGGTCTGAATGGAGATGGGCTGCAGACCGAG	2		0	-	NM_001081045	1990	CCGCTGGAACTGGCTTCAGGCCCATGTTTCTGACTTGGAATATCGAATTCGTCA	1700081L11Rik
SRR029642.12623189	+	6	2	2	AGTTGGACTCCTGCGTTCACCCTGTGCTAGCATTTCCAGATGGAAACGTAGGTC	2		0	-	NM_001081045	1990	CCGCTGGAACTGGCTTCAGGCCCATGTTTCTGACTTGGAATATCGAATTCGTCA	1700081L11Rik
SRR029642.12623189	+	6	2	2	AGTTGGACTCCTGCGTTCACCCTGTGCTAGCATTTCCAGATGGAAACGTAGGTC	2		0	-	NM_001081045	638	TCTCTGTGCTGAATGGCTGCGATGGCGCCCGCTCTCACTGACGCAGCAGCTGAA	1700081L11Rik
SRR029642.1553629	+	6	2	2	AGTTGGACTCCTGCGTTCACCCTGTGCTAGCATTTCCAGATGGAAACGTAGGTC	2		2	-	NM_001081045	2010	CCCATTTTTCTTACTTGGAATATCGAATTCGTCAGCAAACAGATATTTACAAAC	1700081L11Rik
SRR029642.12623189	+	6	2	2	AGTTGGACTCCTGCGTTCACCCTGTGCTAGCATTTCCAGATGGAAACGTAGGTC	2		0	-	NM_001081045	1994	TGGAACTGGCTTCAGGCCCATGTTTCTGACTTGGAATATCGAATTCGTCAGCAA	1700081L11Rik
SRR029642.424569	+	6	2	10	TCCTGCGTTCACCCTGTGCTAGCATTTCCAGATGGAAACGTAGGTCTGAATGGA	2		1	-	NM_001081045	2010	CCCATTTTTCTGACTTGGAATATCGAATTCGTCAGCAAACAGATATTTACAAAC	1700081L11Rik
SRR029642.14349664	+	5	2	28	TCCTCTTTCTAAGAAGGAAACGTAGGTCTGAATGGAGATGGGCTGCAGACCGAG	2		0	-	NM_001081045	1994	TGGAACTGGCTTCAGGCCCATGTTTCTGACTTGGAATATCGAATTCGTCAGCAA	1700081L11Rik
SRR029642.10955753	+	5	2	18	GCAGCATCGTTCCTCTTTCTAAGCAGGAAACGTAGGTCTGAATGGAGATGGGCT	2	23:A>C	1	-	NM_001081045	2010	CCCATTTTTCTGACTTGGAATATCGAATTCGTCAGCAAACAGATATTTACAAAC	1700081L11Rik
SRR029642.7231016	+	6	2	14	GCGTTCACCCTGTGCTAGCATTTCCAGATGGAAACGTAGGTCTGAATGGAGATG	2		0	-	NM_001081045	2009	GCCCATGTTTCTGACTTGGAATATCGAATTCGTCAGCAAACAGATATTTACAAA	1700081L11Rik
SRR029642.10373941	+	1	1	24	GAGCAATGCCATGTGCCCCTTGTGTTCTCAGGGGAGGCAGCAAGGGGCCGTGGG	2	53:A>G	0	-	NM_001081045	638	TCTCTGTGCTGAATGGCTGCGATGGCGCCCGCTCTCACTGACGCAGCAGCTGAA	1700081L11Rik
SRR029642.1553629	+	6	2	2	AGTTGGACTCCTGCGTTCACCCTGTGCTAGCATTTCCAGATGGAAACGTAGGTC	2		1	-	NM_001081045	1987	CAGCCGCTGGAACTGGCTTCAGGCCCATGTTTCTGACTGGGAATATCGAATTCG	1700081L11Rik
SRR029642.9955317	+	6	2	17	TTCACCCTGTGCTAGCATTTCCAGATGGAAACGTAGGTCTGAATGGAGATGGGC	2		0	-	NM_001081045	1994	TGGAACTGGCTTCAGGCCCATGTTTCTGACTTGGAATATCGAATTCGTCAGCAA	1700081L11Rik
SRR029642.10955753	+	5	2	18	GCAGCATCGTTCCTCTTTCTAAGCAGGAAACGTAGGTCTGAATGGAGATGGGCT	2	23:A>C	0	-	NM_001081045	1994	TGGAACTGGCTTCAGGCCCATGTTTCTGACTTGGAATATCGAATTCGTCAGCAA	1700081L11Rik
SRR029642.15036252	+	6	2	5	TGGACTCCTGCGTTCACCCTGTGCTAGCATTTCCAGATGGAAACGTAGGTCTGA	2		0	-	NM_001081045	2009	GCCCATGTTTCTGACTTGGAATATCGAATTCGTCAGCAAACAGATATTTACAAA	1700081L11Rik
SRR029642.8508967	+	5	2	18	GCAGCATCGTTCCTCTTTCTAAGAAGGAAACGTAGGTCTGAATGGAGATGGGCT	2		0	-	NM_001081045	638	TCTCTGTGCTGAATGGCTGCGATGGCGCCCGCTCTCACTGACGCAGCAGCTGAA	1700081L11Rik
SRR029642.9955317	+	6	2	17	TTCACCCTGTGCTAGCATTTCCAGATGGAAACGTAGGTCTGAATGGAGATGGGC	2		0	-	NM_001081045	2009	GCCCATGTTTCTGACTTGGAATATCGAATTCGTCAGCAAACAGATATTTACAAA	1700081L11Rik
SRR029642.10955753	+	5	2	18	GCAGCATCGTTCCTCTTTCTAAGCAGGAAACGTAGGTCTGAATGGAGATGGGCT	2	23:A>C	0	-	NM_001081045	638	TCTCTGTGCTGAATGGCTGCGATGGCGCCCGCTCTCACTGACGCAGCAGCTGAA	1700081L11Rik
SRR029642.10373941	+	1	1	24	GAGCAATGCCATGTGCCCCTTGTGTTCTCAGGGGAGGCAGCAAGGGGCCGTGGG	2	53:A>G	0	-	NM_001081045	1994	TGGAACTGGCTTCAGGCCCATGTTTCTGACTTGGAATATCGAATTCGTCAGCAA	1700081L11Rik
SRR029642.10955753	+	5	2	18	GCAGCATCGTTCCTCTTTCTAAGCAGGAAACGTAGGTCTGAATGGAGATGGGCT	2	23:A>C	0	-	NM_001081045	2009	GCCCATGTTTCTGACTTGGAATATCGAATTCGTCAGCAAACAGATATTTACAAA	1700081L11Rik
SRR029642.10373941	+	1	1	24	GAGCAATGCCATGTGCCCCTTGTGTTCTCAGGGGAGGCAGCAAGGGGCCGTGGG	2	53:A>G	1	-	NM_001081045	2010	CCCATTTTTCTGACTTGGAATATCGAATTCGTCAGCAAACAGATATTTACAAAC	1700081L11Rik
SRR029642.10373941	+	1	1	24	GAGCAATGCCATGTGCCCCTTGTGTTCTCAGGGGAGGCAGCAAGGGGCCGTGGG	2	53:A>G	0	-	NM_001081045	2009	GCCCATGTTTCTGACTTGGAATATCGAATTCGTCAGCAAACAGATATTTACAAA	1700081L11Rik
SRR029642.12623189	+	6	2	2	AGTTGGACTCCTGCGTTCACCCTGTGCTAGCATTTCCAGATGGAAACGTAGGTC	2		0	-	NM_001081045	2009	GCCCATGTTTCTGACTTGGAATATCGAATTCGTCAGCAAACAGATATTTACAAA	1700081L11Rik
SRR029642.14349664	+	5	2	28	TCCTCTTTCTAAGAAGGAAACGTAGGTCTGAATGGAGATGGGCTGCAGACCGAG	2		0	-	NM_001081045	2009	GCCCATGTTTCTGACTTGGAATATCGAATTCGTCAGCAAACAGATATTTACAAA	1700081L11Rik
SRR029642.18696083	+	6	2	8	ACTCCTGCGTTCACCCTGTGCTAGCATTTCCAGATGGAAACGTAGGTCTGAATG	2		0	-	NM_001081045	1987	CAGCCGCTGGAACTGGCTTCAGGCCCATGTTTCTGACTTGGAATATCGAATTCG	1700081L11Rik
SRR029642.8508967	+	5	2	18	GCAGCATCGTTCCTCTTTCTAAGAAGGAAACGTAGGTCTGAATGGAGATGGGCT	2		0	-	NM_001081045	1994	TGGAACTGGCTTCAGGCCCATGTTTCTGACTTGGAATATCGAATTCGTCAGCAA	1700081L11Rik
SRR029642.9955317	+	6	2	17	TTCACCCTGTGCTAGCATTTCCAGATGGAAACGTAGGTCTGAATGGAGATGGGC	2		0	-	NM_001081045	638	TCTCTGTGCTGAATGGCTGCGATGGCGCCCGCTCTCACTGACGCAGCAGCTGAA	1700081L11Rik
SRR029642.424569	+	6	2	10	TCCTGCGTTCACCCTGTGCTAGCATTTCCAGATGGAAACGTAGGTCTGAATGGA	2		0	-	NM_001081045	1994	TGGAACTGGCTTCAGGCCCATGTTTCTGACTTGGAATATCGAATTCGTCAGCAA	1700081L11Rik
SRR029642.2411247	+	5	2	28	TCCTCTTTCTAAGAAGGAAACGTAGGTCTGAATGGAGATGGGCTGCAGACCGAG	2		0	-	NM_001081045	1994	TGGAACTGGCTTCAGGCCCATGTTTCTGACTTGGAATATCGAATTCGTCAGCAA	1700081L11Rik
SRR029642.2072198	+	6	2	33	ATTTCCAGATGGAAACGTAGGTCTGAATGGAGATGGGCTGCAGACCGAGCAGCT	2		1	-	NM_001081045	2010	CCCATTTTTCTGACTTGGAATATCGAATTCGTCAGCAAACAGATATTTACAAAC	1700081L11Rik
SRR029642.6053216	+	3	2	24	ATCATGGGAGAGATAAATTGGAAACGTAGGTCTGAATGGAGATGGGCTGCAGAC	2		0	-	NM_001081045	1994	TGGAACTGGCTTCAGGCCCATGTTTCTGACTTGGAATATCGAATTCGTCAGCAA	1700081L11Rik
SRR029642.7231016	+	6	2	14	GCGTTCACCCTGTGCTAGCATTTCCAGATGGAAACGTAGGTCTGAATGGAGATG	2		0	-	NM_001081045	1994	TGGAACTGGCTTCAGGCCCATGTTTCTGACTTGGAATATCGAATTCGTCAGCAA	1700081L11Rik
SRR029642.2072198	+	6	2	33	ATTTCCAGATGGAAACGTAGGTCTGAATGGAGATGGGCTGCAGACCGAGCAGCT	2		0	-	NM_001081045	1994	TGGAACTGGCTTCAGGCCCATGTTTCTGACTTGGAATATCGAATTCGTCAGCAA	1700081L11Rik
SRR029642.1300656	+	6	2	6	GGACTCCTGCGTTCACCCTGTGCTAGCATTTCCAGATGGAAACGTAGGTCTGAA	2		0	-	NM_001081045	1994	TGGAACTGGCTTCAGGCCCATGTTTCTGACTTGGAATATCGAATTCGTCAGCAA	1700081L11Rik
SRR029642.1553629	+	6	2	2	AGTTGGACTCCTGCGTTCACCCTGTGCTAGCATTTCCAGATGGAAACGTAGGTC	2		0	-	NM_001081045	1994	TGGAACTGGCTTCAGGCCCATGTTTCTGACTTGGAATATCGAATTCGTCAGCAA	1700081L11Rik
SRR029642.19995666	+	6	2	2	AGTTGGACTCCTGCGTTCACCCTGTGCTAGCATTTCCAGATGGAAACGTAGGTC	2		0	-	NM_001081045	1987	CAGCCGCTGGAACTGGCTTCAGGCCCATGTTTCTGACTTGGAATATCGAATTCG	1700081L11Rik
SRR029642.8508967	+	5	2	18	GCAGCATCGTTCCTCTTTCTAAGAAGGAAACGTAGGTCTGAATGGAGATGGGCT	2		0	-	NM_001081045	2009	GCCCATGTTTCTGACTTGGAATATCGAATTCGTCAGCAAACAGATATTTACAAA	1700081L11Rik
SRR029642.2072198	+	6	2	33	ATTTCCAGATGGAAACGTAGGTCTGAATGGAGATGGGCTGCAGACCGAGCAGCT	2		2	-	NM_001081045	2010	CCCATTTTTCTTACTTGGAATATCGAATTCGTCAGCAAACAGATATTTACAAAC	1700081L11Rik
SRR029642.7231016	+	6	2	14	GCGTTCACCCTGTGCTAGCATTTCCAGATGGAAACGTAGGTCTGAATGGAGATG	2		0	-	NM_001081045	1990	CCGCTGGAACTGGCTTCAGGCCCATGTTTCTGACTTGGAATATCGAATTCGTCA	1700081L11Rik
SRR029642.6053216	+	3	2	24	ATCATGGGAGAGATAAATTGGAAACGTAGGTCTGAATGGAGATGGGCTGCAGAC	2		0	-	NM_001081045	2009	GCCCATGTTTCTGACTTGGAATATCGAATTCGTCAGCAAACAGATATTTACAAA	1700081L11Rik
SRR029642.2411247	+	5	2	28	TCCTCTTTCTAAGAAGGAAACGTAGGTCTGAATGGAGATGGGCTGCAGACCGAG	2		2	-	NM_001081045	2010	CCCATTTTTCTTACTTGGAATATCGAATTCGTCAGCAAACAGATATTTACAAAC	1700081L11Rik
SRR029642.18696083	+	6	2	8	ACTCCTGCGTTCACCCTGTGCTAGCATTTCCAGATGGAAACGTAGGTCTGAATG	2		0	-	NM_001081045	1990	CCGCTGGAACTGGCTTCAGGCCCATGTTTCTGACTTGGAATATCGAATTCGTCA	1700081L11Rik
SRR029642.6053216	+	3	2	24	ATCATGGGAGAGATAAATTGGAAACGTAGGTCTGAATGGAGATGGGCTGCAGAC	2		2	-	NM_001081045	2010	CCCATTTTTCTTACTTGGAATATCGAATTCGTCAGCAAACAGATATTTACAAAC	1700081L11Rik
SRR029642.19995666	+	6	2	2	AGTTGGACTCCTGCGTTCACCCTGTGCTAGCATTTCCAGATGGAAACGTAGGTC	2		0	-	NM_001081045	1990	CCGCTGGAACTGGCTTCAGGCCCATGTTTCTGACTTGGAATATCGAATTCGTCA	1700081L11Rik
SRR029642.14349664	+	5	2	28	TCCTCTTTCTAAGAAGGAAACGTAGGTCTGAATGGAGATGGGCTGCAGACCGAG	2		0	-	NM_001081045	1987	CAGCCGCTGGAACTGGCTTCAGGCCCATGTTTCTGACTTGGAATATCGAATTCG	1700081L11Rik
SRR029642.8508967	+	5	2	18	GCAGCATCGTTCCTCTTTCTAAGAAGGAAACGTAGGTCTGAATGGAGATGGGCT	2		0	-	NM_001081045	1990	CCGCTGGAACTGGCTTCAGGCCCATGTTTCTGACTTGGAATATCGAATTCGTCA	1700081L11Rik
SRR029642.10373941	+	1	1	24	GAGCAATGCCATGTGCCCCTTGTGTTCTCAGGGGAGGCAGCAAGGGGCCGTGGG	2	53:A>G	0	-	NM_001081045	1990	CCGCTGGAACTGGCTTCAGGCCCATGTTTCTGACTTGGAATATCGAATTCGTCA	1700081L11Rik
SRR029642.10955753	+	5	2	18	GCAGCATCGTTCCTCTTTCTAAGCAGGAAACGTAGGTCTGAATGGAGATGGGCT	2	23:A>C	0	-	NM_001081045	1990	CCGCTGGAACTGGCTTCAGGCCCATGTTTCTGACTTGGAATATCGAATTCGTCA	1700081L11Rik
SRR029642.15036252	+	6	2	5	TGGACTCCTGCGTTCACCCTGTGCTAGCATTTCCAGATGGAAACGTAGGTCTGA	2		0	-	NM_001081045	1990	CCGCTGGAACTGGCTTCAGGCCCATGTTTCTGACTTGGAATATCGAATTCGTCA	1700081L11Rik
SRR029642.9955317	+	6	2	17	TTCACCCTGTGCTAGCATTTCCAGATGGAAACGTAGGTCTGAATGGAGATGGGC	2		0	-	NM_001081045	1990	CCGCTGGAACTGGCTTCAGGCCCATGTTTCTGACTTGGAATATCGAATTCGTCA	1700081L11Rik
SRR029642.2072198	+	6	2	33	ATTTCCAGATGGAAACGTAGGTCTGAATGGAGATGGGCTGCAGACCGAGCAGCT	2		0	-	NM_001081045	1990	CCGCTGGAACTGGCTTCAGGCCCATGTTTCTGACTTGGAATATCGAATTCGTCA	1700081L11Rik
SRR029642.424569	+	6	2	10	TCCTGCGTTCACCCTGTGCTAGCATTTCCAGATGGAAACGTAGGTCTGAATGGA	2		0	-	NM_001081045	1990	CCGCTGGAACTGGCTTCAGGCCCATGTTTCTGACTTGGAATATCGAATTCGTCA	1700081L11Rik
SRR029642.6053216	+	3	2	24	ATCATGGGAGAGATAAATTGGAAACGTAGGTCTGAATGGAGATGGGCTGCAGAC	2		0	-	NM_001081045	1990	CCGCTGGAACTGGCTTCAGGCCCATGTTTCTGACTTGGAATATCGAATTCGTCA	1700081L11Rik
SRR029642.1300656	+	6	2	6	GGACTCCTGCGTTCACCCTGTGCTAGCATTTCCAGATGGAAACGTAGGTCTGAA	2		0	-	NM_001081045	1990	CCGCTGGAACTGGCTTCAGGCCCATGTTTCTGACTTGGAATATCGAATTCGTCA	1700081L11Rik
SRR029642.2411247	+	5	2	28	TCCTCTTTCTAAGAAGGAAACGTAGGTCTGAATGGAGATGGGCTGCAGACCGAG	2		0	-	NM_001081045	1990	CCGCTGGAACTGGCTTCAGGCCCATGTTTCTGACTTGGAATATCGAATTCGTCA	1700081L11Rik
SRR029642.1553629	+	6	2	2	AGTTGGACTCCTGCGTTCACCCTGTGCTAGCATTTCCAGATGGAAACGTAGGTC	2		0	-	NM_001081045	1990	CCGCTGGAACTGGCTTCAGGCCCATGTTTCTGACTTGGAATATCGAATTCGTCA	1700081L11Rik
SRR029642.17793605	-	5	2	2	AGGCGTGTTAGGCCCAGCAGCATCGTTCCTCTTTCTAAGAAGGAAACGTAGGTC	2	49:T>G	0	+	NM_001081045	2521	GAATCCCTCTTGTGCACTGTGTGGTTCAGGCAGTGTGAACACCATGCCTCCTGA	1700081L11Rik
SRR029642.17877528	-	6	2	32	CATTTCCAGATGGAAACGTAGGTCTGAATGGAGATGGGCTGCAGACCGAGCAGC	2		0	+	NM_001081045	2521	GAATCCCTCTTGTGCACTGTGTGGTTCAGGCAGTGTGAACACCATGCCTCCTGA	1700081L11Rik
SRR029642.18248990	-	6	2	14	GCGTTCACCCTGTGCTAGCATTTCCNGATGGAAACGTAGGTCTGAATGGAGATG	2	28:A>N	0	+	NM_001081045	2521	GAATCCCTCTTGTGCACTGTGTGGTTCAGGCAGTGTGAACACCATGCCTCCTGA	1700081L11Rik
SRR029642.7231016	+	6	2	14	GCGTTCACCCTGTGCTAGCATTTCCAGATGGAAACGTAGGTCTGAATGGAGATG	2		0	-	NM_001081045	1987	CAGCCGCTGGAACTGGCTTCAGGCCCATGTTTCTGACTTGGAATATCGAATTCG	1700081L11Rik
SRR029642.2411247	+	5	2	28	TCCTCTTTCTAAGAAGGAAACGTAGGTCTGAATGGAGATGGGCTGCAGACCGAG	2		1	-	NM_001081045	1987	CAGCCGCTGGAACTGGCTTCAGGCCCATGTTTCTGACTGGGAATATCGAATTCG	1700081L11Rik
SRR029642.2411247	+	5	2	28	TCCTCTTTCTAAGAAGGAAACGTAGGTCTGAATGGAGATGGGCTGCAGACCGAG	2		1	-	NM_001081045	2010	CCCAGGTTTCTGACTTGGAATATCGAATTCGTCAGCAAACAGATATTTACAAAC	1700081L11Rik
SRR029642.6053216	+	3	2	24	ATCATGGGAGAGATAAATTGGAAACGTAGGTCTGAATGGAGATGGGCTGCAGAC	2		1	-	NM_001081045	1987	CAGCCGCTGGAACTGGCTTCAGGCCCATGTTTCTGACTGGGAATATCGAATTCG	1700081L11Rik
SRR029642.1300656	+	6	2	6	GGACTCCTGCGTTCACCCTGTGCTAGCATTTCCAGATGGAAACGTAGGTCTGAA	2		0	-	NM_001081045	638	TCTCTGTGCTGAATGGCTGCGATGGCGCCCGCTCTCACTGACGCAGCAGCTGAA	1700081L11Rik
SRR029642.10373941	+	1	1	24	GAGCAATGCCATGTGCCCCTTGTGTTCTCAGGGGAGGCAGCAAGGGGCCGTGGG	2	53:A>G	1	-	NM_001081045	1987	CAGCCGCTGGAACTGGCTTCAGGCCCATGTTTCTGACTGGGAATATCGAATTCG	1700081L11Rik
SRR029642.7231016	+	6	2	14	GCGTTCACCCTGTGCTAGCATTTCCAGATGGAAACGTAGGTCTGAATGGAGATG	2		0	-	NM_001081045	638	TCTCTGTGCTGAATGGCTGCGATGGCGCCCGCTCTCACTGACGCAGCAGCTGAA	1700081L11Rik
SRR029642.8508967	+	5	2	18	GCAGCATCGTTCCTCTTTCTAAGAAGGAAACGTAGGTCTGAATGGAGATGGGCT	2		2	-	NM_001081045	2010	CCCATTTTTCTTACTTGGAATATCGAATTCGTCAGCAAACAGATATTTACAAAC	1700081L11Rik
SRR029642.19995666	+	6	2	2	AGTTGGACTCCTGCGTTCACCCTGTGCTAGCATTTCCAGATGGAAACGTAGGTC	2		0	-	NM_001081045	638	TCTCTGTGCTGAATGGCTGCGATGGCGCCCGCTCTCACTGACGCAGCAGCTGAA	1700081L11Rik
SRR029642.10955753	+	5	2	18	GCAGCATCGTTCCTCTTTCTAAGCAGGAAACGTAGGTCTGAATGGAGATGGGCT	2	23:A>C	0	-	NM_001081045	1989	GCCGCTGGAACTGGCTTCAGGCCCATGTTTCTGACTTGGAATATCGAATTCGTC	1700081L11Rik
SRR029642.18696083	+	6	2	8	ACTCCTGCGTTCACCCTGTGCTAGCATTTCCAGATGGAAACGTAGGTCTGAATG	2		0	-	NM_001081045	1989	GCCGCTGGAACTGGCTTCAGGCCCATGTTTCTGACTTGGAATATCGAATTCGTC	1700081L11Rik
SRR029642.19995666	+	6	2	2	AGTTGGACTCCTGCGTTCACCCTGTGCTAGCATTTCCAGATGGAAACGTAGGTC	2		0	-	NM_001081045	1989	GCCGCTGGAACTGGCTTCAGGCCCATGTTTCTGACTTGGAATATCGAATTCGTC	1700081L11Rik
SRR029642.10373941	+	1	1	24	GAGCAATGCCATGTGCCCCTTGTGTTCTCAGGGGAGGCAGCAAGGGGCCGTGGG	2	53:A>G	0	-	NM_001081045	1989	GCCGCTGGAACTGGCTTCAGGCCCATGTTTCTGACTTGGAATATCGAATTCGTC	1700081L11Rik
SRR029642.7231016	+	6	2	14	GCGTTCACCCTGTGCTAGCATTTCCAGATGGAAACGTAGGTCTGAATGGAGATG	2		0	-	NM_001081045	1988	AGCCGCTGGAACTGGCTTCAGGCCCATGTTTCTGACTTGGAATATCGAATTCGT	1700081L11Rik
SRR029642.8508967	+	5	2	18	GCAGCATCGTTCCTCTTTCTAAGAAGGAAACGTAGGTCTGAATGGAGATGGGCT	2		0	-	NM_001081045	1987	CAGCCGCTGGAACTGGCTTCAGGCCCATGTTTCTGACTTGGAATATCGAATTCG	1700081L11Rik
SRR029642.2411247	+	5	2	28	TCCTCTTTCTAAGAAGGAAACGTAGGTCTGAATGGAGATGGGCTGCAGACCGAG	2		0	-	NM_001081045	638	TCTCTGTGCTGAATGGCTGCGATGGCGCCCGCTCTCACTGACGCAGCAGCTGAA	1700081L11Rik
SRR029642.10373941	+	1	1	24	GAGCAATGCCATGTGCCCCTTGTGTTCTCAGGGGAGGCAGCAAGGGGCCGTGGG	2	53:A>G	2	-	NM_001081045	2010	CCCATTTTTCTTACTTGGAATATCGAATTCGTCAGCAAACAGATATTTACAAAC	1700081L11Rik
SRR029642.9955317	+	6	2	17	TTCACCCTGTGCTAGCATTTCCAGATGGAAACGTAGGTCTGAATGGAGATGGGC	2		1	-	NM_001081045	1987	CAGCCGCTGGAACTGGCTTCAGGCCCATGTTTCTGACTGGGAATATCGAATTCG	1700081L11Rik
SRR029642.10373941	+	1	1	24	GAGCAATGCCATGTGCCCCTTGTGTTCTCAGGGGAGGCAGCAAGGGGCCGTGGG	2	53:A>G	0	-	NM_001081045	1987	CAGCCGCTGGAACTGGCTTCAGGCCCATGTTTCTGACTTGGAATATCGAATTCG	1700081L11Rik
SRR029642.2411247	+	5	2	28	TCCTCTTTCTAAGAAGGAAACGTAGGTCTGAATGGAGATGGGCTGCAGACCGAG	2		1	-	NM_001081045	2010	CCCATTTTTCTGACTTGGAATATCGAATTCGTCAGCAAACAGATATTTACAAAC	1700081L11Rik
SRR029642.9955317	+	6	2	17	TTCACCCTGTGCTAGCATTTCCAGATGGAAACGTAGGTCTGAATGGAGATGGGC	2		0	-	NM_001081045	1987	CAGCCGCTGGAACTGGCTTCAGGCCCATGTTTCTGACTTGGAATATCGAATTCG	1700081L11Rik
SRR029642.11034420	-	5	2	5	CTTGTTAGGCCCAGCAGCATCGTTCCTCTTTCTAAGAAGGAAACGTAGGTCTGA	2		0	+	NM_001081045	2521	GAATCCCTCTTGTGCACTGTGTGGTTCAGGCAGTGTGAACACCATGCCTCCTGA	1700081L11Rik
SRR029642.15241272	-	5	3	12	GGCCCAGCAGCATCGTTCCTCTTTCTAAGAAGGGGTTGATAGTCCTTGGGGAGG	2		0	+	NM_001081045	2521	GAATCCCTCTTGTGCACTGTGTGGTTCAGGCAGTGTGAACACCATGCCTCCTGA	1700081L11Rik
SRR029642.16516652	-	6	2	7	GACTCCTGCGTTCACCCTGTGCTAGCATTTCCAGATGGAAACGTAGGTCTGAAT	2		0	+	NM_001081045	2521	GAATCCCTCTTGTGCACTGTGTGGTTCAGGCAGTGTGAACACCATGCCTCCTGA	1700081L11Rik
SRR029642.6053216	+	3	2	24	ATCATGGGAGAGATAAATTGGAAACGTAGGTCTGAATGGAGATGGGCTGCAGAC	2		0	-	NM_001081045	638	TCTCTGTGCTGAATGGCTGCGATGGCGCCCGCTCTCACTGACGCAGCAGCTGAA	1700081L11Rik
SRR029642.12623189	+	6	2	2	AGTTGGACTCCTGCGTTCACCCTGTGCTAGCATTTCCAGATGGAAACGTAGGTC	2		0	-	NM_001081045	1989	GCCGCTGGAACTGGCTTCAGGCCCATGTTTCTGACTTGGAATATCGAATTCGTC	1700081L11Rik
SRR029642.424569	+	6	2	10	TCCTGCGTTCACCCTGTGCTAGCATTTCCAGATGGAAACGTAGGTCTGAATGGA	2		2	-	NM_001081045	2010	CCCATTTTTCTTACTTGGAATATCGAATTCGTCAGCAAACAGATATTTACAAAC	1700081L11Rik
SRR029642.14349664	+	5	2	28	TCCTCTTTCTAAGAAGGAAACGTAGGTCTGAATGGAGATGGGCTGCAGACCGAG	2		0	-	NM_001081045	1989	GCCGCTGGAACTGGCTTCAGGCCCATGTTTCTGACTTGGAATATCGAATTCGTC	1700081L11Rik
SRR029642.15036252	+	6	2	5	TGGACTCCTGCGTTCACCCTGTGCTAGCATTTCCAGATGGAAACGTAGGTCTGA	2		0	-	NM_001081045	1989	GCCGCTGGAACTGGCTTCAGGCCCATGTTTCTGACTTGGAATATCGAATTCGTC	1700081L11Rik
SRR029642.11034420	-	5	2	5	CTTGTTAGGCCCAGCAGCATCGTTCCTCTTTCTAAGAAGGAAACGTAGGTCTGA	2		0	+	NM_001081045	2354	TTACATAAAAAGCAAAGGCTGAATTTAGTTTCTTCATCTGATGGCACGTGTGTC	1700081L11Rik
SRR029642.15241272	-	5	3	12	GGCCCAGCAGCATCGTTCCTCTTTCTAAGAAGGGGTTGATAGTCCTTGGGGAGG	2		0	+	NM_001081045	2354	TTACATAAAAAGCAAAGGCTGAATTTAGTTTCTTCATCTGATGGCACGTGTGTC	1700081L11Rik
SRR029642.8508967	+	5	2	18	GCAGCATCGTTCCTCTTTCTAAGAAGGAAACGTAGGTCTGAATGGAGATGGGCT	2		0	-	NM_001081045	1988	AGCCGCTGGAACTGGCTTCAGGCCCATGTTTCTGACTTGGAATATCGAATTCGT	1700081L11Rik
SRR029642.7231016	+	6	2	14	GCGTTCACCCTGTGCTAGCATTTCCAGATGGAAACGTAGGTCTGAATGGAGATG	2		0	-	NM_001081045	1989	GCCGCTGGAACTGGCTTCAGGCCCATGTTTCTGACTTGGAATATCGAATTCGTC	1700081L11Rik
SRR029642.16516652	-	6	2	7	GACTCCTGCGTTCACCCTGTGCTAGCATTTCCAGATGGAAACGTAGGTCTGAAT	2		0	+	NM_001081045	2354	TTACATAAAAAGCAAAGGCTGAATTTAGTTTCTTCATCTGATGGCACGTGTGTC	1700081L11Rik
SRR029642.17793605	-	5	2	2	AGGCGTGTTAGGCCCAGCAGCATCGTTCCTCTTTCTAAGAAGGAAACGTAGGTC	2	49:T>G	0	+	NM_001081045	2354	TTACATAAAAAGCAAAGGCTGAATTTAGTTTCTTCATCTGATGGCACGTGTGTC	1700081L11Rik
SRR029642.1553629	+	6	2	2	AGTTGGACTCCTGCGTTCACCCTGTGCTAGCATTTCCAGATGGAAACGTAGGTC	2		0	-	NM_001081045	1987	CAGCCGCTGGAACTGGCTTCAGGCCCATGTTTCTGACTTGGAATATCGAATTCG	1700081L11Rik
SRR029642.8508967	+	5	2	18	GCAGCATCGTTCCTCTTTCTAAGAAGGAAACGTAGGTCTGAATGGAGATGGGCT	2		0	-	NM_001081045	1989	GCCGCTGGAACTGGCTTCAGGCCCATGTTTCTGACTTGGAATATCGAATTCGTC	1700081L11Rik
SRR029642.5835018	-	6	2	32	CATTTCCAGATGGAAACGTAGGTCTGAATGGAGATGGGCTGCAGACCGAGCAGC	2		0	+	NM_001081045	2354	TTACATAAAAAGCAAAGGCTGAATTTAGTTTCTTCATCTGATGGCACGTGTGTC	1700081L11Rik
SRR029642.3643965	-	6	4	21	CCCTGTGCTAGCATTTCCAGATGATTGAGTCTGTTTCTCAGCCATCAGAAAACC	2		0	+	NM_001081045	2354	TTACATAAAAAGCAAAGGCTGAATTTAGTTTCTTCATCTGATGGCACGTGTGTC	1700081L11Rik
SRR029642.7672546	-	6	2	12	CTGCGTTCACCCTGTGCTAGCATTTCCAGATGGAAACGTAGGTCTGAATGGAGA	2		0	+	NM_001081045	2354	TTACATAAAAAGCAAAGGCTGAATTTAGTTTCTTCATCTGATGGCACGTGTGTC	1700081L11Rik
SRR029642.9955317	+	6	2	17	TTCACCCTGTGCTAGCATTTCCAGATGGAAACGTAGGTCTGAATGGAGATGGGC	2		0	-	NM_001081045	1989	GCCGCTGGAACTGGCTTCAGGCCCATGTTTCTGACTTGGAATATCGAATTCGTC	1700081L11Rik
SRR029642.1553629	+	6	2	2	AGTTGGACTCCTGCGTTCACCCTGTGCTAGCATTTCCAGATGGAAACGTAGGTC	2		0	-	NM_001081045	638	TCTCTGTGCTGAATGGCTGCGATGGCGCCCGCTCTCACTGACGCAGCAGCTGAA	1700081L11Rik
SRR029642.1553629	+	6	2	2	AGTTGGACTCCTGCGTTCACCCTGTGCTAGCATTTCCAGATGGAAACGTAGGTC	2		0	-	NM_001081045	1989	GCCGCTGGAACTGGCTTCAGGCCCATGTTTCTGACTTGGAATATCGAATTCGTC	1700081L11Rik
SRR029642.1553629	+	6	2	2	AGTTGGACTCCTGCGTTCACCCTGTGCTAGCATTTCCAGATGGAAACGTAGGTC	2		0	-	NM_001081045	2009	GCCCATGTTTCTGACTTGGAATATCGAATTCGTCAGCAAACAGATATTTACAAA	1700081L11Rik
SRR029642.6053216	+	3	2	24	ATCATGGGAGAGATAAATTGGAAACGTAGGTCTGAATGGAGATGGGCTGCAGAC	2		0	-	NM_001081045	1989	GCCGCTGGAACTGGCTTCAGGCCCATGTTTCTGACTTGGAATATCGAATTCGTC	1700081L11Rik
SRR029642.1300656	+	6	2	6	GGACTCCTGCGTTCACCCTGTGCTAGCATTTCCAGATGGAAACGTAGGTCTGAA	2		0	-	NM_001081045	1989	GCCGCTGGAACTGGCTTCAGGCCCATGTTTCTGACTTGGAATATCGAATTCGTC	1700081L11Rik
SRR029642.424569	+	6	2	10	TCCTGCGTTCACCCTGTGCTAGCATTTCCAGATGGAAACGTAGGTCTGAATGGA	2		0	-	NM_001081045	1989	GCCGCTGGAACTGGCTTCAGGCCCATGTTTCTGACTTGGAATATCGAATTCGTC	1700081L11Rik
SRR029642.1300656	+	6	2	6	GGACTCCTGCGTTCACCCTGTGCTAGCATTTCCAGATGGAAACGTAGGTCTGAA	2		0	-	NM_001081045	1987	CAGCCGCTGGAACTGGCTTCAGGCCCATGTTTCTGACTTGGAATATCGAATTCG	1700081L11Rik
SRR029642.10955753	+	5	2	18	GCAGCATCGTTCCTCTTTCTAAGCAGGAAACGTAGGTCTGAATGGAGATGGGCT	2	23:A>C	2	-	NM_001081045	2010	CCCATTTTTCTTACTTGGAATATCGAATTCGTCAGCAAACAGATATTTACAAAC	1700081L11Rik
SRR029642.424569	+	6	2	10	TCCTGCGTTCACCCTGTGCTAGCATTTCCAGATGGAAACGTAGGTCTGAATGGA	2		0	-	NM_001081045	1987	CAGCCGCTGGAACTGGCTTCAGGCCCATGTTTCTGACTTGGAATATCGAATTCG	1700081L11Rik
SRR029642.5835018	-	6	2	32	CATTTCCAGATGGAAACGTAGGTCTGAATGGAGATGGGCTGCAGACCGAGCAGC	2		0	+	NM_001081045	2521	GAATCCCTCTTGTGCACTGTGTGGTTCAGGCAGTGTGAACACCATGCCTCCTGA	1700081L11Rik
SRR029642.7672546	-	6	2	12	CTGCGTTCACCCTGTGCTAGCATTTCCAGATGGAAACGTAGGTCTGAATGGAGA	2		0	+	NM_001081045	2521	GAATCCCTCTTGTGCACTGTGTGGTTCAGGCAGTGTGAACACCATGCCTCCTGA	1700081L11Rik
SRR029642.10373941	+	1	1	24	GAGCAATGCCATGTGCCCCTTGTGTTCTCAGGGGAGGCAGCAAGGGGCCGTGGG	2	53:A>G	0	-	NM_001081045	1988	AGCCGCTGGAACTGGCTTCAGGCCCATGTTTCTGACTTGGAATATCGAATTCGT	1700081L11Rik
SRR029642.424569	+	6	2	10	TCCTGCGTTCACCCTGTGCTAGCATTTCCAGATGGAAACGTAGGTCTGAATGGA	2		0	-	NM_001081045	2009	GCCCATGTTTCTGACTTGGAATATCGAATTCGTCAGCAAACAGATATTTACAAA	1700081L11Rik
SRR029642.12623189	+	6	2	2	AGTTGGACTCCTGCGTTCACCCTGTGCTAGCATTTCCAGATGGAAACGTAGGTC	2		0	-	NM_001081045	1988	AGCCGCTGGAACTGGCTTCAGGCCCATGTTTCTGACTTGGAATATCGAATTCGT	1700081L11Rik
SRR029642.1300656	+	6	2	6	GGACTCCTGCGTTCACCCTGTGCTAGCATTTCCAGATGGAAACGTAGGTCTGAA	2		0	-	NM_001081045	2009	GCCCATGTTTCTGACTTGGAATATCGAATTCGTCAGCAAACAGATATTTACAAA	1700081L11Rik
SRR029642.19995666	+	6	2	2	AGTTGGACTCCTGCGTTCACCCTGTGCTAGCATTTCCAGATGGAAACGTAGGTC	2		0	-	NM_001081045	1988	AGCCGCTGGAACTGGCTTCAGGCCCATGTTTCTGACTTGGAATATCGAATTCGT	1700081L11Rik
SRR029642.9955317	+	6	2	17	TTCACCCTGTGCTAGCATTTCCAGATGGAAACGTAGGTCTGAATGGAGATGGGC	2		0	-	NM_001081045	1988	AGCCGCTGGAACTGGCTTCAGGCCCATGTTTCTGACTTGGAATATCGAATTCGT	1700081L11Rik
SRR029642.2072198	+	6	2	33	ATTTCCAGATGGAAACGTAGGTCTGAATGGAGATGGGCTGCAGACCGAGCAGCT	2		0	-	NM_001081045	638	TCTCTGTGCTGAATGGCTGCGATGGCGCCCGCTCTCACTGACGCAGCAGCTGAA	1700081L11Rik
SRR029642.10955753	+	5	2	18	GCAGCATCGTTCCTCTTTCTAAGCAGGAAACGTAGGTCTGAATGGAGATGGGCT	2	23:A>C	0	-	NM_001081045	1988	AGCCGCTGGAACTGGCTTCAGGCCCATGTTTCTGACTTGGAATATCGAATTCGT	1700081L11Rik
SRR029642.14349664	+	5	2	28	TCCTCTTTCTAAGAAGGAAACGTAGGTCTGAATGGAGATGGGCTGCAGACCGAG	2		0	-	NM_001081045	1988	AGCCGCTGGAACTGGCTTCAGGCCCATGTTTCTGACTTGGAATATCGAATTCGT	1700081L11Rik
SRR029642.18696083	+	6	2	8	ACTCCTGCGTTCACCCTGTGCTAGCATTTCCAGATGGAAACGTAGGTCTGAATG	2		0	-	NM_001081045	1988	AGCCGCTGGAACTGGCTTCAGGCCCATGTTTCTGACTTGGAATATCGAATTCGT	1700081L11Rik
SRR029642.15036252	+	6	2	5	TGGACTCCTGCGTTCACCCTGTGCTAGCATTTCCAGATGGAAACGTAGGTCTGA	2		0	-	NM_001081045	1988	AGCCGCTGGAACTGGCTTCAGGCCCATGTTTCTGACTTGGAATATCGAATTCGT	1700081L11Rik
SRR029642.1300656	+	6	2	6	GGACTCCTGCGTTCACCCTGTGCTAGCATTTCCAGATGGAAACGTAGGTCTGAA	2		1	-	NM_001081045	1987	CAGCCGCTGGAACTGGCTTCAGGCCCATGTTTCTGACTGGGAATATCGAATTCG	1700081L11Rik
SRR029642.12623189	+	6	2	2	AGTTGGACTCCTGCGTTCACCCTGTGCTAGCATTTCCAGATGGAAACGTAGGTC	2		2	-	NM_001081045	2010	CCCATTTTTCTTACTTGGAATATCGAATTCGTCAGCAAACAGATATTTACAAAC	1700081L11Rik
SRR029642.14349664	+	5	2	28	TCCTCTTTCTAAGAAGGAAACGTAGGTCTGAATGGAGATGGGCTGCAGACCGAG	2		2	-	NM_001081045	2010	CCCATTTTTCTTACTTGGAATATCGAATTCGTCAGCAAACAGATATTTACAAAC	1700081L11Rik
SRR029642.1300656	+	6	2	6	GGACTCCTGCGTTCACCCTGTGCTAGCATTTCCAGATGGAAACGTAGGTCTGAA	2		1	-	NM_001081045	2010	CCCAGGTTTCTGACTTGGAATATCGAATTCGTCAGCAAACAGATATTTACAAAC	1700081L11Rik
SRR029642.2072198	+	6	2	33	ATTTCCAGATGGAAACGTAGGTCTGAATGGAGATGGGCTGCAGACCGAGCAGCT	2		1	-	NM_001081045	2010	CCCAGGTTTCTGACTTGGAATATCGAATTCGTCAGCAAACAGATATTTACAAAC	1700081L11Rik
SRR029642.6053216	+	3	2	24	ATCATGGGAGAGATAAATTGGAAACGTAGGTCTGAATGGAGATGGGCTGCAGAC	2		0	-	NM_001081045	1988	AGCCGCTGGAACTGGCTTCAGGCCCATGTTTCTGACTTGGAATATCGAATTCGT	1700081L11Rik
SRR029642.2072198	+	6	2	33	ATTTCCAGATGGAAACGTAGGTCTGAATGGAGATGGGCTGCAGACCGAGCAGCT	2		0	-	NM_001081045	1988	AGCCGCTGGAACTGGCTTCAGGCCCATGTTTCTGACTTGGAATATCGAATTCGT	1700081L11Rik
SRR029642.2411247	+	5	2	28	TCCTCTTTCTAAGAAGGAAACGTAGGTCTGAATGGAGATGGGCTGCAGACCGAG	2		0	-	NM_001081045	1988	AGCCGCTGGAACTGGCTTCAGGCCCATGTTTCTGACTTGGAATATCGAATTCGT	1700081L11Rik
SRR029642.424569	+	6	2	10	TCCTGCGTTCACCCTGTGCTAGCATTTCCAGATGGAAACGTAGGTCTGAATGGA	2		0	-	NM_001081045	1988	AGCCGCTGGAACTGGCTTCAGGCCCATGTTTCTGACTTGGAATATCGAATTCGT	1700081L11Rik
SRR029642.1300656	+	6	2	6	GGACTCCTGCGTTCACCCTGTGCTAGCATTTCCAGATGGAAACGTAGGTCTGAA	2		0	-	NM_001081045	1988	AGCCGCTGGAACTGGCTTCAGGCCCATGTTTCTGACTTGGAATATCGAATTCGT	1700081L11Rik
SRR029642.1553629	+	6	2	2	AGTTGGACTCCTGCGTTCACCCTGTGCTAGCATTTCCAGATGGAAACGTAGGTC	2		0	-	NM_001081045	1988	AGCCGCTGGAACTGGCTTCAGGCCCATGTTTCTGACTTGGAATATCGAATTCGT	1700081L11Rik
SRR029642.18696083	+	6	2	8	ACTCCTGCGTTCACCCTGTGCTAGCATTTCCAGATGGAAACGTAGGTCTGAATG	2		1	-	NM_001081045	1987	CAGCCGCTGGAACTGGCTTCAGGCCCATGTTTCTGACTGGGAATATCGAATTCG	1700081L11Rik
SRR029642.15036252	+	6	2	5	TGGACTCCTGCGTTCACCCTGTGCTAGCATTTCCAGATGGAAACGTAGGTCTGA	2		1	-	NM_001081045	1987	CAGCCGCTGGAACTGGCTTCAGGCCCATGTTTCTGACTGGGAATATCGAATTCG	1700081L11Rik
SRR029642.19995666	+	6	2	2	AGTTGGACTCCTGCGTTCACCCTGTGCTAGCATTTCCAGATGGAAACGTAGGTC	2		1	-	NM_001081045	1987	CAGCCGCTGGAACTGGCTTCAGGCCCATGTTTCTGACTGGGAATATCGAATTCG	1700081L11Rik
SRR029642.6053216	+	3	2	24	ATCATGGGAGAGATAAATTGGAAACGTAGGTCTGAATGGAGATGGGCTGCAGAC	2		0	-	NM_001081045	1987	CAGCCGCTGGAACTGGCTTCAGGCCCATGTTTCTGACTTGGAATATCGAATTCG	1700081L11Rik
SRR029642.424569	+	6	2	10	TCCTGCGTTCACCCTGTGCTAGCATTTCCAGATGGAAACGTAGGTCTGAATGGA	2		0	-	NM_001081045	638	TCTCTGTGCTGAATGGCTGCGATGGCGCCCGCTCTCACTGACGCAGCAGCTGAA	1700081L11Rik
SRR029642.15036252	+	6	2	5	TGGACTCCTGCGTTCACCCTGTGCTAGCATTTCCAGATGGAAACGTAGGTCTGA	2		2	-	NM_001081045	2010	CCCATTTTTCTTACTTGGAATATCGAATTCGTCAGCAAACAGATATTTACAAAC	1700081L11Rik
SRR029642.2072198	+	6	2	33	ATTTCCAGATGGAAACGTAGGTCTGAATGGAGATGGGCTGCAGACCGAGCAGCT	2		1	-	NM_001081045	1987	CAGCCGCTGGAACTGGCTTCAGGCCCATGTTTCTGACTGGGAATATCGAATTCG	1700081L11Rik
SRR029642.9955317	+	6	2	17	TTCACCCTGTGCTAGCATTTCCAGATGGAAACGTAGGTCTGAATGGAGATGGGC	2		2	-	NM_001081045	2010	CCCATTTTTCTTACTTGGAATATCGAATTCGTCAGCAAACAGATATTTACAAAC	1700081L11Rik
SRR029642.14349664	+	5	2	28	TCCTCTTTCTAAGAAGGAAACGTAGGTCTGAATGGAGATGGGCTGCAGACCGAG	2		1	-	NM_001081045	1987	CAGCCGCTGGAACTGGCTTCAGGCCCATGTTTCTGACTGGGAATATCGAATTCG	1700081L11Rik
SRR029642.18696083	+	6	2	8	ACTCCTGCGTTCACCCTGTGCTAGCATTTCCAGATGGAAACGTAGGTCTGAATG	2		0	-	NM_001081045	2010	CCCATGTTTCTGACTTGGAATATCGAATTCGTCAGCAAACAGATATTTACAAAC	1700081L11Rik
SRR029642.15036252	+	6	2	5	TGGACTCCTGCGTTCACCCTGTGCTAGCATTTCCAGATGGAAACGTAGGTCTGA	2		1	-	NM_001081045	2010	CCCATTTTTCTGACTTGGAATATCGAATTCGTCAGCAAACAGATATTTACAAAC	1700081L11Rik
SRR029642.19995666	+	6	2	2	AGTTGGACTCCTGCGTTCACCCTGTGCTAGCATTTCCAGATGGAAACGTAGGTC	2		0	-	NM_001081045	2010	CCCATGTTTCTGACTTGGAATATCGAATTCGTCAGCAAACAGATATTTACAAAC	1700081L11Rik
SRR029642.2072198	+	6	2	33	ATTTCCAGATGGAAACGTAGGTCTGAATGGAGATGGGCTGCAGACCGAGCAGCT	2		0	-	NM_001081045	1987	CAGCCGCTGGAACTGGCTTCAGGCCCATGTTTCTGACTTGGAATATCGAATTCG	1700081L11Rik
SRR029642.6053216	+	3	2	24	ATCATGGGAGAGATAAATTGGAAACGTAGGTCTGAATGGAGATGGGCTGCAGAC	2		1	-	NM_001081045	2010	CCCAGGTTTCTGACTTGGAATATCGAATTCGTCAGCAAACAGATATTTACAAAC	1700081L11Rik
SRR029642.15036252	+	6	2	5	TGGACTCCTGCGTTCACCCTGTGCTAGCATTTCCAGATGGAAACGTAGGTCTGA	2		0	-	NM_001081045	2010	CCCATGTTTCTGACTTGGAATATCGAATTCGTCAGCAAACAGATATTTACAAAC	1700081L11Rik
SRR029642.12623189	+	6	2	2	AGTTGGACTCCTGCGTTCACCCTGTGCTAGCATTTCCAGATGGAAACGTAGGTC	2		0	-	NM_001081045	2010	CCCATGTTTCTGACTTGGAATATCGAATTCGTCAGCAAACAGATATTTACAAAC	1700081L11Rik
SRR029642.14349664	+	5	2	28	TCCTCTTTCTAAGAAGGAAACGTAGGTCTGAATGGAGATGGGCTGCAGACCGAG	2		0	-	NM_001081045	2010	CCCATGTTTCTGACTTGGAATATCGAATTCGTCAGCAAACAGATATTTACAAAC	1700081L11Rik
SRR029642.424569	+	6	2	10	TCCTGCGTTCACCCTGTGCTAGCATTTCCAGATGGAAACGTAGGTCTGAATGGA	2		0	-	NM_001081045	2010	CCCATGTTTCTGACTTGGAATATCGAATTCGTCAGCAAACAGATATTTACAAAC	1700081L11Rik
SRR029642.7231016	+	6	2	14	GCGTTCACCCTGTGCTAGCATTTCCAGATGGAAACGTAGGTCTGAATGGAGATG	2		0	-	NM_001081045	2010	CCCATGTTTCTGACTTGGAATATCGAATTCGTCAGCAAACAGATATTTACAAAC	1700081L11Rik
SRR029642.10955753	+	5	2	18	GCAGCATCGTTCCTCTTTCTAAGCAGGAAACGTAGGTCTGAATGGAGATGGGCT	2	23:A>C	0	-	NM_001081045	2010	CCCATGTTTCTGACTTGGAATATCGAATTCGTCAGCAAACAGATATTTACAAAC	1700081L11Rik
SRR029642.8508967	+	5	2	18	GCAGCATCGTTCCTCTTTCTAAGAAGGAAACGTAGGTCTGAATGGAGATGGGCT	2		0	-	NM_001081045	2010	CCCATGTTTCTGACTTGGAATATCGAATTCGTCAGCAAACAGATATTTACAAAC	1700081L11Rik
SRR029642.10373941	+	1	1	24	GAGCAATGCCATGTGCCCCTTGTGTTCTCAGGGGAGGCAGCAAGGGGCCGTGGG	2	53:A>G	0	-	NM_001081045	2010	CCCATGTTTCTGACTTGGAATATCGAATTCGTCAGCAAACAGATATTTACAAAC	1700081L11Rik
SRR029642.9955317	+	6	2	17	TTCACCCTGTGCTAGCATTTCCAGATGGAAACGTAGGTCTGAATGGAGATGGGC	2		0	-	NM_001081045	2010	CCCATGTTTCTGACTTGGAATATCGAATTCGTCAGCAAACAGATATTTACAAAC	1700081L11Rik
SRR029642.1300656	+	6	2	6	GGACTCCTGCGTTCACCCTGTGCTAGCATTTCCAGATGGAAACGTAGGTCTGAA	2		0	-	NM_001081045	2010	CCCATGTTTCTGACTTGGAATATCGAATTCGTCAGCAAACAGATATTTACAAAC	1700081L11Rik
SRR029642.6053216	+	3	2	24	ATCATGGGAGAGATAAATTGGAAACGTAGGTCTGAATGGAGATGGGCTGCAGAC	2		0	-	NM_001081045	2010	CCCATGTTTCTGACTTGGAATATCGAATTCGTCAGCAAACAGATATTTACAAAC	1700081L11Rik
SRR029642.1553629	+	6	2	2	AGTTGGACTCCTGCGTTCACCCTGTGCTAGCATTTCCAGATGGAAACGTAGGTC	2		0	-	NM_001081045	2010	CCCATGTTTCTGACTTGGAATATCGAATTCGTCAGCAAACAGATATTTACAAAC	1700081L11Rik
SRR029642.2411247	+	5	2	28	TCCTCTTTCTAAGAAGGAAACGTAGGTCTGAATGGAGATGGGCTGCAGACCGAG	2		0	-	NM_001081045	2010	CCCATGTTTCTGACTTGGAATATCGAATTCGTCAGCAAACAGATATTTACAAAC	1700081L11Rik
SRR029642.2072198	+	6	2	33	ATTTCCAGATGGAAACGTAGGTCTGAATGGAGATGGGCTGCAGACCGAGCAGCT	2		0	-	NM_001081045	2010	CCCATGTTTCTGACTTGGAATATCGAATTCGTCAGCAAACAGATATTTACAAAC	1700081L11Rik
SRR029642.3643965	-	6	4	21	CCCTGTGCTAGCATTTCCAGATGATTGAGTCTGTTTCTCAGCCATCAGAAAACC	2		0	+	NM_001081045	2521	GAATCCCTCTTGTGCACTGTGTGGTTCAGGCAGTGTGAACACCATGCCTCCTGA	1700081L11Rik
SRR029642.1553629	+	6	2	2	AGTTGGACTCCTGCGTTCACCCTGTGCTAGCATTTCCAGATGGAAACGTAGGTC	2		1	-	NM_001081045	2010	CCCATTTTTCTGACTTGGAATATCGAATTCGTCAGCAAACAGATATTTACAAAC	1700081L11Rik
SRR029642.15241272	-	5	3	12	GGCCCAGCAGCATCGTTCCTCTTTCTAAGAAGGGGTTGATAGTCCTTGGGGAGG	2		0	+	NM_001081045	2540	TGTGGTTCAGGCAGTGTGAACACCATGCCTCCTGAAATACACTATGAAGCACCT	1700081L11Rik
SRR029642.2072198	+	6	2	33	ATTTCCAGATGGAAACGTAGGTCTGAATGGAGATGGGCTGCAGACCGAGCAGCT	2		0	-	NM_001081045	1989	GCCGCTGGAACTGGCTTCAGGCCCATGTTTCTGACTTGGAATATCGAATTCGTC	1700081L11Rik
SRR029642.19995666	+	6	2	2	AGTTGGACTCCTGCGTTCACCCTGTGCTAGCATTTCCAGATGGAAACGTAGGTC	2		2	-	NM_001081045	2010	CCCATTTTTCTTACTTGGAATATCGAATTCGTCAGCAAACAGATATTTACAAAC	1700081L11Rik
SRR029642.18696083	+	6	2	8	ACTCCTGCGTTCACCCTGTGCTAGCATTTCCAGATGGAAACGTAGGTCTGAATG	2		2	-	NM_001081045	2010	CCCATTTTTCTTACTTGGAATATCGAATTCGTCAGCAAACAGATATTTACAAAC	1700081L11Rik
SRR029642.12623189	+	6	2	2	AGTTGGACTCCTGCGTTCACCCTGTGCTAGCATTTCCAGATGGAAACGTAGGTC	2		1	-	NM_001081045	1987	CAGCCGCTGGAACTGGCTTCAGGCCCATGTTTCTGACTGGGAATATCGAATTCG	1700081L11Rik
SRR029642.16516652	-	6	2	7	GACTCCTGCGTTCACCCTGTGCTAGCATTTCCAGATGGAAACGTAGGTCTGAAT	2		0	+	NM_001081045	2540	TGTGGTTCAGGCAGTGTGAACACCATGCCTCCTGAAATACACTATGAAGCACCT	1700081L11Rik
SRR029642.18696083	+	6	2	8	ACTCCTGCGTTCACCCTGTGCTAGCATTTCCAGATGGAAACGTAGGTCTGAATG	2		0	-	NM_001081045	2010	CCCATGTTTCTGACTTGGAATATCGAATTCGTCAGCAAACAGATATTTACAAAC	1700081L11Rik
SRR029642.424569	+	6	2	10	TCCTGCGTTCACCCTGTGCTAGCATTTCCAGATGGAAACGTAGGTCTGAATGGA	2		0	-	NM_001081045	2010	CCCATGTTTCTGACTTGGAATATCGAATTCGTCAGCAAACAGATATTTACAAAC	1700081L11Rik
SRR029642.19995666	+	6	2	2	AGTTGGACTCCTGCGTTCACCCTGTGCTAGCATTTCCAGATGGAAACGTAGGTC	2		0	-	NM_001081045	2010	CCCATGTTTCTGACTTGGAATATCGAATTCGTCAGCAAACAGATATTTACAAAC	1700081L11Rik
SRR029642.8508967	+	5	2	18	GCAGCATCGTTCCTCTTTCTAAGAAGGAAACGTAGGTCTGAATGGAGATGGGCT	2		0	-	NM_001081045	2010	CCCATGTTTCTGACTTGGAATATCGAATTCGTCAGCAAACAGATATTTACAAAC	1700081L11Rik
SRR029642.14349664	+	5	2	28	TCCTCTTTCTAAGAAGGAAACGTAGGTCTGAATGGAGATGGGCTGCAGACCGAG	2		0	-	NM_001081045	2010	CCCATGTTTCTGACTTGGAATATCGAATTCGTCAGCAAACAGATATTTACAAAC	1700081L11Rik
SRR029642.15036252	+	6	2	5	TGGACTCCTGCGTTCACCCTGTGCTAGCATTTCCAGATGGAAACGTAGGTCTGA	2		0	-	NM_001081045	2010	CCCATGTTTCTGACTTGGAATATCGAATTCGTCAGCAAACAGATATTTACAAAC	1700081L11Rik
SRR029642.9955317	+	6	2	17	TTCACCCTGTGCTAGCATTTCCAGATGGAAACGTAGGTCTGAATGGAGATGGGC	2		0	-	NM_001081045	2010	CCCATGTTTCTGACTTGGAATATCGAATTCGTCAGCAAACAGATATTTACAAAC	1700081L11Rik
SRR029642.12623189	+	6	2	2	AGTTGGACTCCTGCGTTCACCCTGTGCTAGCATTTCCAGATGGAAACGTAGGTC	2		0	-	NM_001081045	2010	CCCATGTTTCTGACTTGGAATATCGAATTCGTCAGCAAACAGATATTTACAAAC	1700081L11Rik
SRR029642.10373941	+	1	1	24	GAGCAATGCCATGTGCCCCTTGTGTTCTCAGGGGAGGCAGCAAGGGGCCGTGGG	2	53:A>G	0	-	NM_001081045	2010	CCCATGTTTCTGACTTGGAATATCGAATTCGTCAGCAAACAGATATTTACAAAC	1700081L11Rik
SRR029642.10955753	+	5	2	18	GCAGCATCGTTCCTCTTTCTAAGCAGGAAACGTAGGTCTGAATGGAGATGGGCT	2	23:A>C	0	-	NM_001081045	2010	CCCATGTTTCTGACTTGGAATATCGAATTCGTCAGCAAACAGATATTTACAAAC	1700081L11Rik
SRR029642.2072198	+	6	2	33	ATTTCCAGATGGAAACGTAGGTCTGAATGGAGATGGGCTGCAGACCGAGCAGCT	2		0	-	NM_001081045	2010	CCCATGTTTCTGACTTGGAATATCGAATTCGTCAGCAAACAGATATTTACAAAC	1700081L11Rik
SRR029642.2411247	+	5	2	28	TCCTCTTTCTAAGAAGGAAACGTAGGTCTGAATGGAGATGGGCTGCAGACCGAG	2		0	-	NM_001081045	2010	CCCATGTTTCTGACTTGGAATATCGAATTCGTCAGCAAACAGATATTTACAAAC	1700081L11Rik
SRR029642.7231016	+	6	2	14	GCGTTCACCCTGTGCTAGCATTTCCAGATGGAAACGTAGGTCTGAATGGAGATG	2		0	-	NM_001081045	2010	CCCATGTTTCTGACTTGGAATATCGAATTCGTCAGCAAACAGATATTTACAAAC	1700081L11Rik
SRR029642.6053216	+	3	2	24	ATCATGGGAGAGATAAATTGGAAACGTAGGTCTGAATGGAGATGGGCTGCAGAC	2		0	-	NM_001081045	2010	CCCATGTTTCTGACTTGGAATATCGAATTCGTCAGCAAACAGATATTTACAAAC	1700081L11Rik
SRR029642.8508967	+	5	2	18	GCAGCATCGTTCCTCTTTCTAAGAAGGAAACGTAGGTCTGAATGGAGATGGGCT	2		1	-	NM_001081045	1987	CAGCCGCTGGAACTGGCTTCAGGCCCATGTTTCTGACTGGGAATATCGAATTCG	1700081L11Rik
SRR029642.1300656	+	6	2	6	GGACTCCTGCGTTCACCCTGTGCTAGCATTTCCAGATGGAAACGTAGGTCTGAA	2		0	-	NM_001081045	2010	CCCATGTTTCTGACTTGGAATATCGAATTCGTCAGCAAACAGATATTTACAAAC	1700081L11Rik
SRR029642.1553629	+	6	2	2	AGTTGGACTCCTGCGTTCACCCTGTGCTAGCATTTCCAGATGGAAACGTAGGTC	2		0	-	NM_001081045	2010	CCCATGTTTCTGACTTGGAATATCGAATTCGTCAGCAAACAGATATTTACAAAC	1700081L11Rik
SRR029642.7231016	+	6	2	14	GCGTTCACCCTGTGCTAGCATTTCCAGATGGAAACGTAGGTCTGAATGGAGATG	2		1	-	NM_001081045	2010	CCCAGGTTTCTGACTTGGAATATCGAATTCGTCAGCAAACAGATATTTACAAAC	1700081L11Rik
SRR029642.19995666	+	6	2	2	AGTTGGACTCCTGCGTTCACCCTGTGCTAGCATTTCCAGATGGAAACGTAGGTC	2		0	-	NM_001081045	2023	CTTGGAATATCGAATTCGTCAGCAAACAGATATTTACAAACAGATACGTGCTAA	1700081L11Rik
SRR029642.14349664	+	5	2	28	TCCTCTTTCTAAGAAGGAAACGTAGGTCTGAATGGAGATGGGCTGCAGACCGAG	2		1	-	NM_001081045	2010	CCCAGGTTTCTGACTTGGAATATCGAATTCGTCAGCAAACAGATATTTACAAAC	1700081L11Rik
SRR029642.15036252	+	6	2	5	TGGACTCCTGCGTTCACCCTGTGCTAGCATTTCCAGATGGAAACGTAGGTCTGA	2		0	-	NM_001081045	2023	CTTGGAATATCGAATTCGTCAGCAAACAGATATTTACAAACAGATACGTGCTAA	1700081L11Rik
SRR029642.7231016	+	6	2	14	GCGTTCACCCTGTGCTAGCATTTCCAGATGGAAACGTAGGTCTGAATGGAGATG	2		1	-	NM_001081045	2010	CCCATTTTTCTGACTTGGAATATCGAATTCGTCAGCAAACAGATATTTACAAAC	1700081L11Rik
SRR029642.18696083	+	6	2	8	ACTCCTGCGTTCACCCTGTGCTAGCATTTCCAGATGGAAACGTAGGTCTGAATG	2		0	-	NM_001081045	2023	CTTGGAATATCGAATTCGTCAGCAAACAGATATTTACAAACAGATACGTGCTAA	1700081L11Rik
SRR029642.14349664	+	5	2	28	TCCTCTTTCTAAGAAGGAAACGTAGGTCTGAATGGAGATGGGCTGCAGACCGAG	2		0	-	NM_001081045	2023	CTTGGAATATCGAATTCGTCAGCAAACAGATATTTACAAACAGATACGTGCTAA	1700081L11Rik
SRR029642.18248990	-	6	2	14	GCGTTCACCCTGTGCTAGCATTTCCNGATGGAAACGTAGGTCTGAATGGAGATG	2	28:A>N	0	+	NM_001081045	2354	TTACATAAAAAGCAAAGGCTGAATTTAGTTTCTTCATCTGATGGCACGTGTGTC	1700081L11Rik
SRR029642.12623189	+	6	2	2	AGTTGGACTCCTGCGTTCACCCTGTGCTAGCATTTCCAGATGGAAACGTAGGTC	2		0	-	NM_001081045	2023	CTTGGAATATCGAATTCGTCAGCAAACAGATATTTACAAACAGATACGTGCTAA	1700081L11Rik
SRR029642.424569	+	6	2	10	TCCTGCGTTCACCCTGTGCTAGCATTTCCAGATGGAAACGTAGGTCTGAATGGA	2		1	-	NM_001081045	1987	CAGCCGCTGGAACTGGCTTCAGGCCCATGTTTCTGACTGGGAATATCGAATTCG	1700081L11Rik
SRR029642.10373941	+	1	1	24	GAGCAATGCCATGTGCCCCTTGTGTTCTCAGGGGAGGCAGCAAGGGGCCGTGGG	2	53:A>G	0	-	NM_001081045	2023	CTTGGAATATCGAATTCGTCAGCAAACAGATATTTACAAACAGATACGTGCTAA	1700081L11Rik
SRR029642.10955753	+	5	2	18	GCAGCATCGTTCCTCTTTCTAAGCAGGAAACGTAGGTCTGAATGGAGATGGGCT	2	23:A>C	0	-	NM_001081045	2023	CTTGGAATATCGAATTCGTCAGCAAACAGATATTTACAAACAGATACGTGCTAA	1700081L11Rik
SRR029642.9955317	+	6	2	17	TTCACCCTGTGCTAGCATTTCCAGATGGAAACGTAGGTCTGAATGGAGATGGGC	2		0	-	NM_001081045	2023	CTTGGAATATCGAATTCGTCAGCAAACAGATATTTACAAACAGATACGTGCTAA	1700081L11Rik
SRR029642.1300656	+	6	2	6	GGACTCCTGCGTTCACCCTGTGCTAGCATTTCCAGATGGAAACGTAGGTCTGAA	2		1	-	NM_001081045	2010	CCCATTTTTCTGACTTGGAATATCGAATTCGTCAGCAAACAGATATTTACAAAC	1700081L11Rik
SRR029642.8508967	+	5	2	18	GCAGCATCGTTCCTCTTTCTAAGAAGGAAACGTAGGTCTGAATGGAGATGGGCT	2		0	-	NM_001081045	2023	CTTGGAATATCGAATTCGTCAGCAAACAGATATTTACAAACAGATACGTGCTAA	1700081L11Rik
SRR029642.17877528	-	6	2	32	CATTTCCAGATGGAAACGTAGGTCTGAATGGAGATGGGCTGCAGACCGAGCAGC	2		0	+	NM_001081045	2354	TTACATAAAAAGCAAAGGCTGAATTTAGTTTCTTCATCTGATGGCACGTGTGTC	1700081L11Rik
SRR029642.2072198	+	6	2	33	ATTTCCAGATGGAAACGTAGGTCTGAATGGAGATGGGCTGCAGACCGAGCAGCT	2		0	-	NM_001081045	2023	CTTGGAATATCGAATTCGTCAGCAAACAGATATTTACAAACAGATACGTGCTAA	1700081L11Rik
SRR029642.7231016	+	6	2	14	GCGTTCACCCTGTGCTAGCATTTCCAGATGGAAACGTAGGTCTGAATGGAGATG	2		0	-	NM_001081045	2023	CTTGGAATATCGAATTCGTCAGCAAACAGATATTTACAAACAGATACGTGCTAA	1700081L11Rik
SRR029642.10955753	+	5	2	18	GCAGCATCGTTCCTCTTTCTAAGCAGGAAACGTAGGTCTGAATGGAGATGGGCT	2	23:A>C	1	-	NM_001081045	1987	CAGCCGCTGGAACTGGCTTCAGGCCCATGTTTCTGACTGGGAATATCGAATTCG	1700081L11Rik
SRR029642.2411247	+	5	2	28	TCCTCTTTCTAAGAAGGAAACGTAGGTCTGAATGGAGATGGGCTGCAGACCGAG	2		0	-	NM_001081045	2023	CTTGGAATATCGAATTCGTCAGCAAACAGATATTTACAAACAGATACGTGCTAA	1700081L11Rik
SRR029642.18248990	-	6	2	14	GCGTTCACCCTGTGCTAGCATTTCCNGATGGAAACGTAGGTCTGAATGGAGATG	2	28:A>N	0	+	NM_001081045	2540	TGTGGTTCAGGCAGTGTGAACACCATGCCTCCTGAAATACACTATGAAGCACCT	1700081L11Rik
SRR029642.6053216	+	3	2	24	ATCATGGGAGAGATAAATTGGAAACGTAGGTCTGAATGGAGATGGGCTGCAGAC	2		0	-	NM_001081045	2023	CTTGGAATATCGAATTCGTCAGCAAACAGATATTTACAAACAGATACGTGCTAA	1700081L11Rik
SRR029642.1300656	+	6	2	6	GGACTCCTGCGTTCACCCTGTGCTAGCATTTCCAGATGGAAACGTAGGTCTGAA	2		0	-	NM_001081045	2023	CTTGGAATATCGAATTCGTCAGCAAACAGATATTTACAAACAGATACGTGCTAA	1700081L11Rik
SRR029642.1553629	+	6	2	2	AGTTGGACTCCTGCGTTCACCCTGTGCTAGCATTTCCAGATGGAAACGTAGGTC	2		0	-	NM_001081045	2023	CTTGGAATATCGAATTCGTCAGCAAACAGATATTTACAAACAGATACGTGCTAA	1700081L11Rik
SRR029642.424569	+	6	2	10	TCCTGCGTTCACCCTGTGCTAGCATTTCCAGATGGAAACGTAGGTCTGAATGGA	2		0	-	NM_001081045	2023	CTTGGAATATCGAATTCGTCAGCAAACAGATATTTACAAACAGATACGTGCTAA	1700081L11Rik
SRR029642.1553629	+	6	2	2	AGTTGGACTCCTGCGTTCACCCTGTGCTAGCATTTCCAGATGGAAACGTAGGTC	2		1	-	NM_001081045	2010	CCCAGGTTTCTGACTTGGAATATCGAATTCGTCAGCAAACAGATATTTACAAAC	1700081L11Rik
SRR029642.9955317	+	6	2	17	TTCACCCTGTGCTAGCATTTCCAGATGGAAACGTAGGTCTGAATGGAGATGGGC	2		1	-	NM_001081045	2010	CCCAGGTTTCTGACTTGGAATATCGAATTCGTCAGCAAACAGATATTTACAAAC	1700081L11Rik
SRR029642.19995666	+	6	2	2	AGTTGGACTCCTGCGTTCACCCTGTGCTAGCATTTCCAGATGGAAACGTAGGTC	2		1	-	NM_001081045	2010	CCCAGGTTTCTGACTTGGAATATCGAATTCGTCAGCAAACAGATATTTACAAAC	1700081L11Rik
SRR029642.10373941	+	1	1	24	GAGCAATGCCATGTGCCCCTTGTGTTCTCAGGGGAGGCAGCAAGGGGCCGTGGG	2	53:A>G	1	-	NM_001081045	2010	CCCAGGTTTCTGACTTGGAATATCGAATTCGTCAGCAAACAGATATTTACAAAC	1700081L11Rik
SRR029642.8508967	+	5	2	18	GCAGCATCGTTCCTCTTTCTAAGAAGGAAACGTAGGTCTGAATGGAGATGGGCT	2		1	-	NM_001081045	2010	CCCAGGTTTCTGACTTGGAATATCGAATTCGTCAGCAAACAGATATTTACAAAC	1700081L11Rik
SRR029642.12623189	+	6	2	2	AGTTGGACTCCTGCGTTCACCCTGTGCTAGCATTTCCAGATGGAAACGTAGGTC	2		1	-	NM_001081045	2010	CCCAGGTTTCTGACTTGGAATATCGAATTCGTCAGCAAACAGATATTTACAAAC	1700081L11Rik
SRR029642.15036252	+	6	2	5	TGGACTCCTGCGTTCACCCTGTGCTAGCATTTCCAGATGGAAACGTAGGTCTGA	2		1	-	NM_001081045	2010	CCCAGGTTTCTGACTTGGAATATCGAATTCGTCAGCAAACAGATATTTACAAAC	1700081L11Rik
SRR029642.18696083	+	6	2	8	ACTCCTGCGTTCACCCTGTGCTAGCATTTCCAGATGGAAACGTAGGTCTGAATG	2		1	-	NM_001081045	2010	CCCAGGTTTCTGACTTGGAATATCGAATTCGTCAGCAAACAGATATTTACAAAC	1700081L11Rik
SRR029642.13320477	-	9	4	0	AGAACATCGTCCGAGATTGGCTTGAGTGTTCCGGAATACCTAAGCCCACACATC	2		0	+	NM_028079	2065	AAGAAAATTTGTGCATCTGTTTCATGGGCAGCTGATTCTTTCCCAGGATTTTCT	2010111I01Rik
SRR029642.17292764	+	8	4	9	CAAATGCTGTTGGAGAACATTCCAGAAAATAAAAGTCCACACATCATCTTCCTC	2	29:C>T,35:C>T	1	-	NM_028079	1271	ACAGAAATGAAGCCCAAGGCATCCCCACCAGATGATCGGATGACTGAGCACTCT	2010111I01Rik
SRR029642.8001530	-	9	4	0	AGAACATCGTCCGAGATTGGCTTGAGTGTTCCGGAATACCTAAGCCCACACATC	2		0	+	NM_028079	2065	AAGAAAATTTGTGCATCTGTTTCATGGGCAGCTGATTCTTTCCCAGGATTTTCT	2010111I01Rik
SRR029642.12418074	+	3	2	27	AGTCTGGGAATGGCCAGGATACATGAGCTGGCATTACTATGTGACCATGCCAAT	2		0	-	NM_028079	1664	CGTCTTTGCCATGAAATTGCTCACTCCTGGTTTGGCCTAGCCATTGGGGCCCGA	2010111I01Rik
SRR029642.4976628	-	11	4	23	CGAGAAGTCGCCTTTGAAAAGCCCACACATCATCTTCCTCGCTCAGAGCACCTT	2	13:T>G	0	+	NM_028079	2065	AAGAAAATTTGTGCATCTGTTTCATGGGCAGCTGATTCTTTCCCAGGATTTTCT	2010111I01Rik
SRR029642.12418074	+	3	2	27	AGTCTGGGAATGGCCAGGATACATGAGCTGGCATTACTATGTGACCATGCCAAT	2		1	-	NM_028079	1271	ACAGAAATGAAGCCCAAGGCATCCCCACCAGATGATCGGATGACTGAGCACTCT	2010111I01Rik
SRR029642.13320477	-	9	4	0	AGAACATCGTCCGAGATTGGCTTGAGTGTTCCGGAATACCTAAGCCCACACATC	2		0	+	NM_028079	2079	ATCTGTTTCATGGGCAGCTGATTCTTTCCCAGGATTTTCTTCAAATGCTGTTGG	2010111I01Rik
SRR029642.17292764	+	8	4	9	CAAATGCTGTTGGAGAACATTCCAGAAAATAAAAGTCCACACATCATCTTCCTC	2	29:C>T,35:C>T	1	-	NM_028079	2231	CGAAAGGCCGAGGACTGCTCGCCGAGTAGGCTCGCACGGCAAGTAGGCTCCGAG	2010111I01Rik
SRR029642.8001530	-	9	4	0	AGAACATCGTCCGAGATTGGCTTGAGTGTTCCGGAATACCTAAGCCCACACATC	2		0	+	NM_028079	2079	ATCTGTTTCATGGGCAGCTGATTCTTTCCCAGGATTTTCTTCAAATGCTGTTGG	2010111I01Rik
SRR029642.12418074	+	3	2	27	AGTCTGGGAATGGCCAGGATACATGAGCTGGCATTACTATGTGACCATGCCAAT	2		1	-	NM_028079	2231	CGAAAGGCCGAGGACTGCTCGCCGAGTAGGCTCGCACGGCAAGTAGGCTCCGAG	2010111I01Rik
SRR029642.4976628	-	11	4	23	CGAGAAGTCGCCTTTGAAAAGCCCACACATCATCTTCCTCGCTCAGAGCACCTT	2	13:T>G	0	+	NM_028079	2079	ATCTGTTTCATGGGCAGCTGATTCTTTCCCAGGATTTTCTTCAAATGCTGTTGG	2010111I01Rik
SRR029642.17292764	+	8	4	9	CAAATGCTGTTGGAGAACATTCCAGAAAATAAAAGTCCACACATCATCTTCCTC	2	29:C>T,35:C>T	0	-	NM_028079	1664	CGTCTTTGCCATGAAATTGCTCACTCCTGGTTTGGCCTAGCCATTGGGGCCCGA	2010111I01Rik
SRR029642.8001530	-	9	4	0	AGAACATCGTCCGAGATTGGCTTGAGTGTTCCGGAATACCTAAGCCCACACATC	2		2	+	NM_028079	2241	AGGACTGCTCGCCGAGTAGGTTCGCACGGCAAGTAGGCTCCGAGGTGGCGACAT	2010111I01Rik
SRR029642.4976628	-	11	4	23	CGAGAAGTCGCCTTTGAAAAGCCCACACATCATCTTCCTCGCTCAGAGCACCTT	2	13:T>G	2	+	NM_028079	2241	AGGACTGCTCGCCGAGTAGGTTCGCACGGCAAGTAGGCTCCGAGGTGGCGACAT	2010111I01Rik
SRR029642.13320477	-	9	4	0	AGAACATCGTCCGAGATTGGCTTGAGTGTTCCGGAATACCTAAGCCCACACATC	2		2	+	NM_028079	2241	AGGACTGCTCGCCGAGTAGGTTCGCACGGCAAGTAGGCTCCGAGGTGGCGACAT	2010111I01Rik
SRR029642.13428779	-	18	15	24	GGTGCACTATTCAAAAACAGGCATCACGGAGCTTGCTGCTCAGGCAGTGTCTAT	2		0	+	NM_001145676	933	CTGGATACGGTTACAGAAGAAATGACAAAAATTCTTGAATATTTTTGTGAGCTG	2210408I21Rik
SRR029642.11471730	-	3	3	5	AGAGCTGCAACAAGCGCAGAGGAGCAGTGCATGCTTTGGAAAGATTTATTGAAT	2		0	+	NM_001145676	933	CTGGATACGGTTACAGAAGAAATGACAAAAATTCTTGAATATTTTTGTGAGCTG	2210408I21Rik
SRR029642.8792384	-	18	14	1	TAGGACTGAATAAGATGACCTTCGGTGCACTATTCAAAAACAGTCTCATCGTTC	2		0	+	NM_001145676	933	CTGGATACGGTTACAGAAGAAATGACAAAAATTCTTGAATATTTTTGTGAGCTG	2210408I21Rik
SRR029642.13428779	-	18	15	24	GGTGCACTATTCAAAAACAGGCATCACGGAGCTTGCTGCTCAGGCAGTGTCTAT	2		1	+	NM_001145676	3670	ATAAGGTGGTCAGTGAAAGCATGCTAGATCAGGTGGCCCCAGTGACATGGTGCT	2210408I21Rik
SRR029642.11471730	-	3	3	5	AGAGCTGCAACAAGCGCAGAGGAGCAGTGCATGCTTTGGAAAGATTTATTGAAT	2		1	+	NM_001145676	3670	ATAAGGTGGTCAGTGAAAGCATGCTAGATCAGGTGGCCCCAGTGACATGGTGCT	2210408I21Rik
SRR029642.8792384	-	18	14	1	TAGGACTGAATAAGATGACCTTCGGTGCACTATTCAAAAACAGTCTCATCGTTC	2		1	+	NM_001145676	3670	ATAAGGTGGTCAGTGAAAGCATGCTAGATCAGGTGGCCCCAGTGACATGGTGCT	2210408I21Rik
SRR029642.11471730	-	3	3	5	AGAGCTGCAACAAGCGCAGAGGAGCAGTGCATGCTTTGGAAAGATTTATTGAAT	2		0	+	NM_001145676	3672	AAGGTGGTCAGTGAAAGCATGCTAGATCAGGTGGCCACAGTGACATGGTGCTGC	2210408I21Rik
SRR029642.8792384	-	18	14	1	TAGGACTGAATAAGATGACCTTCGGTGCACTATTCAAAAACAGTCTCATCGTTC	2		0	+	NM_001145676	3672	AAGGTGGTCAGTGAAAGCATGCTAGATCAGGTGGCCACAGTGACATGGTGCTGC	2210408I21Rik
SRR029642.13428779	-	18	15	24	GGTGCACTATTCAAAAACAGGCATCACGGAGCTTGCTGCTCAGGCAGTGTCTAT	2		0	+	NM_001145676	3672	AAGGTGGTCAGTGAAAGCATGCTAGATCAGGTGGCCACAGTGACATGGTGCTGC	2210408I21Rik
SRR029642.19217261	-	6	2	20	AACAGTGGCCTGTTTTCTGAGCAGGCACTAGATGAACCAGCCAGGACTGAAAGC	2		0	+	NM_027150	788	AAGCCTGGAGTAATTCGTCCAGTACCTGTAAAATCCAAACTACTCCTGAGAAAG	2310046A06Rik
SRR029642.15724787	+	5	1	16	AAGCCAGGTGGAATCTGGATAAATCTTGCACCAGCATGCATGAACGAGTGAACA	2		2	-	NM_026120	501	TCATTTTCCTCTTCACTTGGACAAGATCCGGAAATGCATGGACCATAATCAGGA	2410127L17Rik
SRR029642.4089413	+	6	1	8	ATGGACCCTGCGTCTCTGGAGAACATGCTTTCAGAACTGCAGCCGACTCCGCCA	2		0	-	NM_029432	1502	CGTTTTTGACATCTCGGATCTTGGTTAAAGAAAAAGATGGCACTATTACCCCAG	4930402H24Rik
SRR029642.4547672	+	18	16	23	AAAACCCTGCAAGCAACAAAGGCTCGTATGACCGTCTATGACATTCCTGACCTG	2		0	-	NM_029432	1502	CGTTTTTGACATCTCGGATCTTGGTTAAAGAAAAAGATGGCACTATTACCCCAG	4930402H24Rik
SRR029642.4547672	+	18	16	23	AAAACCCTGCAAGCAACAAAGGCTCGTATGACCGTCTATGACATTCCTGACCTG	2		1	-	NM_029432	214	CTCTGCATCCTCGGAAGTGACAGCAGGTACAATGAAGGCTGTAGAGAGCTGGCA	4930402H24Rik
SRR029642.4089413	+	6	1	8	ATGGACCCTGCGTCTCTGGAGAACATGCTTTCAGAACTGCAGCCGACTCCGCCA	2		1	-	NM_029432	214	CTCTGCATCCTCGGAAGTGACAGCAGGTACAATGAAGGCTGTAGAGAGCTGGCA	4930402H24Rik
SRR029642.2670074	-	9	7	26	GGAACCTGAAGCATTCAGTGTCCATGTTGGCTGTTGAAGAGTATGAGGAACTGC	2		0	+	NM_001114312	1464	TCCATAACCTCAGACAACAGCTGGAGCTTCTGGAAGACGACAAGAGGGAGCTAG	4930506M07Rik
SRR029642.5434973	-	8	5	7	GCAGCTTGAAGAAGAGAGGATCCAGCATCAGAAAAAGAACTTCGAGATCAAATT	2		1	+	NM_175172	1286	AAACTGAAGAGACAAAGCCACCTTCTGCTGCAGAGCTCCCTTCCTGACCCGCAG	4930506M07Rik
SRR029642.5468962	+	8	8	14	TGGGAGAGATTTTGCCTTTTGATCCTGCAGGGAACAAGCTTTACCCTGTATACA	2		0	-	NM_172741	1950	AGGCTGACCTGCCTTCTGGAAATGGAAGCAAATCCTCGGGACTGCAGAAGACTT	4931406P16Rik
SRR029642.7120108	-	7	6	28	GCTGGAGAACAGGGAGGTGGTTGTTGACACAGCACAGATTGAAAATAAAGAAGC	2		1	+	NM_172741	1781	GCTACCATGTCCCTGCTGCAGAGGAGCCTGGATCCCGAGAAGACCCTAGGGCTG	4931406P16Rik
SRR029642.14310523	-	8	8	13	CTGGGAGAGATTTTGCCTTTTGATCCTGCAGGGAACAAGCTTTACCCTGTATAC	2		0	+	NM_172741	1781	GCTACCATGTCCCTGCTGCAGAGGAGCCTGGATCCCGAGAAGACCCTAGGTCTG	4931406P16Rik
SRR029642.3366599	-	7	6	28	GCGGGAGAACAGGGAGGTGGTTGTTGACACAGCACAGATTGAAAATAAAGAAGC	2	51:T>G	1	+	NM_172741	1781	GCTACCATGTCCCTGCTGCAGAGGAGCCTGGATCCCGAGAAGACCCTAGGGCTG	4931406P16Rik
SRR029642.7120108	-	7	6	28	GCTGGAGAACAGGGAGGTGGTTGTTGACACAGCACAGATTGAAAATAAAGAAGC	2		0	+	NM_172741	1781	GCTACCATGTCCCTGCTGCAGAGGAGCCTGGATCCCGAGAAGACCCTAGGTCTG	4931406P16Rik
SRR029642.3366599	-	7	6	28	GCGGGAGAACAGGGAGGTGGTTGTTGACACAGCACAGATTGAAAATAAAGAAGC	2	51:T>G	0	+	NM_172741	1781	GCTACCATGTCCCTGCTGCAGAGGAGCCTGGATCCCGAGAAGACCCTAGGTCTG	4931406P16Rik
SRR029642.14310523	-	8	8	13	CTGGGAGAGATTTTGCCTTTTGATCCTGCAGGGAACAAGCTTTACCCTGTATAC	2		1	+	NM_172741	1781	GCTACCATGTCCCTGCTGCAGAGGAGCCTGGATCCCGAGAAGACCCTAGGGCTG	4931406P16Rik
SRR029642.14310523	-	8	8	13	CTGGGAGAGATTTTGCCTTTTGATCCTGCAGGGAACAAGCTTTACCCTGTATAC	2		0	+	NM_172741	2765	AGCTATATGGACAATATGATGTCAGAAGTTTTGGGACAGAAGCCCCAGGGACCT	4931406P16Rik
SRR029642.7120108	-	7	6	28	GCTGGAGAACAGGGAGGTGGTTGTTGACACAGCACAGATTGAAAATAAAGAAGC	2		0	+	NM_172741	2765	AGCTATATGGACAATATGATGTCAGAAGTTTTGGGACAGAAGCCCCAGGGACCT	4931406P16Rik
SRR029642.3366599	-	7	6	28	GCGGGAGAACAGGGAGGTGGTTGTTGACACAGCACAGATTGAAAATAAAGAAGC	2	51:T>G	0	+	NM_172741	2765	AGCTATATGGACAATATGATGTCAGAAGTTTTGGGACAGAAGCCCCAGGGACCT	4931406P16Rik
SRR029642.8506805	+	44	37	8	CAAGGGTTTCCTGCTGTTCAGCTAGCTGATGCACAGGATGAAGGAGTTGAATCT	2		0	-	NM_172679	6360	TGTAGCATGAAGTTGACTATTAAAGAGATTTGGTTTAGTTTTGCAGCTCCCACC	4932438A13Rik
SRR029642.14422799	+	2	1	27	ACCAGAAGCTGGCCCAGATGTTATGAAGAATGTGCTAATGGAGCCAGGCACTAA	2		0	-	NR_029437	349	AAATCATCTAGCATATTGTATCCACTTGTCTTCTATGGATGTACAATTCAAGAA	4933406I18Rik
SRR029642.16390373	+	2	1	10	AGAGAACACTTGGAGTTACCAGAAGCTGGCCCAGATGTTATGAAGAATGTGCTA	2		1	-	NR_029437	356	CGAGCATATTGTATCCACTTGTCTTCTATGGATGTACAATTCAAGAAGATCAAA	4933406I18Rik
SRR029642.17443734	+	2	1	5	AAAGCAGAGAACACTTGGAGTTACCAGAAGCTGGCCCAGATGTTATGAAGAATG	2		1	-	NR_029437	356	CGAGCATATTGTATCCACTTGTCTTCTATGGATGTACAATTCAAGAAGATCAAA	4933406I18Rik
SRR029642.14422799	+	2	1	27	ACCAGAAGCTGGCCCAGATGTTATGAAGAATGTGCTAATGGAGCCAGGCACTAA	2		1	-	NR_029437	356	CGAGCATATTGTATCCACTTGTCTTCTATGGATGTACAATTCAAGAAGATCAAA	4933406I18Rik
SRR029642.4588236	+	2	1	5	AAAGCAGAGAACACTTGGAGTTACCAGAAGCTGGCCCAGATGTTATGAAGAATG	2		1	-	NR_029437	356	CGAGCATATTGTATCCACTTGTCTTCTATGGATGTACAATTCAAGAAGATCAAA	4933406I18Rik
SRR029642.16390373	+	2	1	10	AGAGAACACTTGGAGTTACCAGAAGCTGGCCCAGATGTTATGAAGAATGTGCTA	2		0	-	NR_029437	349	AAATCATCTAGCATATTGTATCCACTTGTCTTCTATGGATGTACAATTCAAGAA	4933406I18Rik
SRR029642.17443734	+	2	1	5	AAAGCAGAGAACACTTGGAGTTACCAGAAGCTGGCCCAGATGTTATGAAGAATG	2		0	-	NR_029437	349	AAATCATCTAGCATATTGTATCCACTTGTCTTCTATGGATGTACAATTCAAGAA	4933406I18Rik
SRR029642.14422799	+	2	1	27	ACCAGAAGCTGGCCCAGATGTTATGAAGAATGTGCTAATGGAGCCAGGCACTAA	2		0	-	NR_029437	371	CACTTGTCTTCTATGGATGTACAATTCAAGAAGATCAAAGGTCCTTGCCGTTAT	4933406I18Rik
SRR029642.4588236	+	2	1	5	AAAGCAGAGAACACTTGGAGTTACCAGAAGCTGGCCCAGATGTTATGAAGAATG	2		0	-	NR_029437	349	AAATCATCTAGCATATTGTATCCACTTGTCTTCTATGGATGTACAATTCAAGAA	4933406I18Rik
SRR029642.16390373	+	2	1	10	AGAGAACACTTGGAGTTACCAGAAGCTGGCCCAGATGTTATGAAGAATGTGCTA	2		0	-	NR_029437	371	CACTTGTCTTCTATGGATGTACAATTCAAGAAGATCAAAGGTCCTTGCCGTTAT	4933406I18Rik
SRR029642.17443734	+	2	1	5	AAAGCAGAGAACACTTGGAGTTACCAGAAGCTGGCCCAGATGTTATGAAGAATG	2		0	-	NR_029437	371	CACTTGTCTTCTATGGATGTACAATTCAAGAAGATCAAAGGTCCTTGCCGTTAT	4933406I18Rik
SRR029642.4588236	+	2	1	5	AAAGCAGAGAACACTTGGAGTTACCAGAAGCTGGCCCAGATGTTATGAAGAATG	2		0	-	NR_029437	371	CACTTGTCTTCTATGGATGTACAATTCAAGAAGATCAAAGGTCCTTGCCGTTAT	4933406I18Rik
SRR029642.4588236	+	2	1	5	AAAGCAGAGAACACTTGGAGTTACCAGAAGCTGGCCCAGATGTTATGAAGAATG	2		0	-	NR_029437	371	CACTTGTCTTCTATGGATGTACAATTCAAGAAGATCAAAGGTCCTTGCCGTTAT	4933406I18Rik
SRR029642.16390373	+	2	1	10	AGAGAACACTTGGAGTTACCAGAAGCTGGCCCAGATGTTATGAAGAATGTGCTA	2		0	-	NR_029437	371	CACTTGTCTTCTATGGATGTACAATTCAAGAAGATCAAAGGTCCTTGCCGTTAT	4933406I18Rik
SRR029642.17443734	+	2	1	5	AAAGCAGAGAACACTTGGAGTTACCAGAAGCTGGCCCAGATGTTATGAAGAATG	2		0	-	NR_029437	371	CACTTGTCTTCTATGGATGTACAATTCAAGAAGATCAAAGGTCCTTGCCGTTAT	4933406I18Rik
SRR029642.14422799	+	2	1	27	ACCAGAAGCTGGCCCAGATGTTATGAAGAATGTGCTAATGGAGCCAGGCACTAA	2		0	-	NR_029437	371	CACTTGTCTTCTATGGATGTACAATTCAAGAAGATCAAAGGTCCTTGCCGTTAT	4933406I18Rik
SRR029642.11872089	-	21	7	2	GCCCAGACCCACTGCCTCCTCATCCTTTCCCAGCAGCTAAAGGATTCCCTTCAA	2	45:T>C,51:T>C	0	+	NM_029897	2810	TCCCACAGTTGGGGTTGTTAAGATGACGCCGCTTTCTTTCATCCCTGGAGCAAA	5730419I09Rik
SRR029642.8488981	-	22	18	26	ACCACTTCTCTCCGCGAGATGTTCACGTCAGTAAGAGTGGTCAGACTAAGTAGC	2		0	+	NM_029897	2810	TCCCACAGTTGGGGTTGTTAAGATGACGCCGCTTTCTTTCATCCCTGGAGCAAA	5730419I09Rik
SRR029642.18400315	-	2	2	6	AGAGCCGTGACCAAGATGGTGGAAGAGCACTTCTACTGAACTATTTTGGTGGAA	2		0	+	NM_175234	697	AATGAAAAAGTGTCTGGCACAGAATTCATAATCGACTTTCTGGAAGAGAAACTT	6230409E13Rik
SRR029642.4266989	-	9	7	30	TACTCAAATTACAGTTCACAGGTAATAAATATGAAGACCGAACTTTCATTCAAT	2		0	+	NM_172600	1216	TGTGTCTGAGACTAACCGAGTGCTCCACTGTACTGGGATTCGGAACCTGGAGTG	6720456H20Rik
SRR029642.16545676	+	3	2	0	ACTTGAAGCAGATGAAGCTGCGAGTGATGAACTCTCAGGAGCAGATCGCGGAGA	2		0	-	NM_001134300	735	TCATGAGCTGCACGGAATGCCAGAAGAGGATGCACTTTAACTCCAGCGGCCCGG	8430427H17Rik
SRR029642.12074286	+	3	2	0	ACTTGAAGCAGATGAAGCTGCGAGTGATGAACTCTCAGGAGCAGATCGCGGAGA	2		0	-	NM_001134300	735	TCATGAGCTGCACGGAATGCCAGAAGAGGATGCACTTTAACTCCAGCGGCCCGG	8430427H17Rik
SRR029642.12074286	+	3	2	0	ACTTGAAGCAGATGAAGCTGCGAGTGATGAACTCTCAGGAGCAGATCGCGGAGA	2		1	-	NM_001134300	739	GAGCTGCACGGAACGCCAGAAGAGGATGCACTTTAACTCCAGCGGCCCGGAGCC	8430427H17Rik
SRR029642.16545676	+	3	2	0	ACTTGAAGCAGATGAAGCTGCGAGTGATGAACTCTCAGGAGCAGATCGCGGAGA	2		1	-	NM_001134300	739	GAGCTGCACGGAACGCCAGAAGAGGATGCACTTTAACTCCAGCGGCCCGGAGCC	8430427H17Rik
SRR029642.17412462	-	19	1	27	GCGGGGGCTCTGGTCAGGTTCTCTAGCCATGGCACAAGTAGAGAAACGGGGAGG	2	48:A>G	0	+	NM_198296	1458	ATGATGAAGGAATTCCCTATGGATCTCTATCTGCGGTGTGTCCAGGTAGTGCAT	9130011E15Rik
SRR029642.18596604	+	3	2	9	CAAGAGGAAATCCAAAAGCATTCTAACCACAGAAGCTTTGCCAGGAAGTAAAGC	2		0	-	NM_001162537	536	GTGATCAAGATAAAATGGAATTTCCCCCAAATCACCTCAACTCGGCACAATGCA	9330159F19Rik
SRR029642.8152989	+	3	2	16	AAAGTCACCTGCTGTGCCGGAATTTCAGGCTTCGGGAGCAAGAAAGAAAAGAAG	2		1	-	NM_172836	992	AAGAAAGCCCCTTGCTCAGGCAGCTCCAGCCTGCATGGAGAACATGTGGGAAAT	9930021J03Rik
SRR029642.11689374	+	4	2	9	AACTCAAAGATCTGGAAAACAGTAGAAAAAAATCGGCTTCGGGAGCAAGAAAGA	2		1	-	NM_172836	992	AAGAAAGCCCCTTGCTCAGGCAGCTCCAGCCTGCATGGAGAACATGTGGGAAAT	9930021J03Rik
SRR029642.8152989	+	3	2	16	AAAGTCACCTGCTGTGCCGGAATTTCAGGCTTCGGGAGCAAGAAAGAAAAGAAG	2		1	-	NM_172836	988	GGGAAAAAAAGCTCCTTGCTCAGGCAGCTCCAGCCTGCATGGAGAACATGTGGG	9930021J03Rik
SRR029642.11689374	+	4	2	9	AACTCAAAGATCTGGAAAACAGTAGAAAAAAATCGGCTTCGGGAGCAAGAAAGA	2		1	-	NM_172836	988	GGGAAAAAAAGCTCCTTGCTCAGGCAGCTCCAGCCTGCATGGAGAACATGTGGG	9930021J03Rik
SRR029642.18722161	+	13	10	19	CAACAGATGCAATGTTTTCATACAGGCCTGTATCGAACAGCAGTTTGATTCTCT	2		0	-	NM_001033375	970	TAGCATTCGCTCAATTTTTGCAAATGTGGAAGCCAAGCTTGGTGAGCCTTCTGA	A230046K03Rik
SRR029642.2004474	+	13	10	19	CAACAGATGCAATGTTTTCATACAGGCCTGTATCGAACAGCAGTTTGATTCTCT	2		0	-	NM_001033375	970	TAGCATTCGCTCAATTTTTGCAAATGTGGAAGCCAAGCTTGGTGAGCCTTCTGA	A230046K03Rik
SRR029642.2004474	+	13	10	19	CAACAGATGCAATGTTTTCATACAGGCCTGTATCGAACAGCAGTTTGATTCTCT	2		0	-	NM_001033375	970	TAGCATTCGCTCAATTTTTGCAAATGTGGAAGCCAAGCTTGGTGAGCCTTCTGA	A230046K03Rik
SRR029642.18722161	+	13	10	19	CAACAGATGCAATGTTTTCATACAGGCCTGTATCGAACAGCAGTTTGATTCTCT	2		0	-	NM_001033375	970	TAGCATTCGCTCAATTTTTGCAAATGTGGAAGCCAAGCTTGGTGAGCCTTCTGA	A230046K03Rik
SRR029642.20680965	-	3	1	1	GATGACAGAGATGATGATATCAGCGACACGTTCTCTGAACCAGAACCGCAAATT	2		0	+	NM_029870	1431	TTGGCAGCGAGCATGAGCTTTCTGAAAATGAAGAGGAGGAAGAAGAGGAAGAGG	A930001N09Rik
SRR029642.4299424	+	3	2	22	AGCGACACGTTCTCTGAACCAGCCCAGCGTAAGCGGAATGGACCCGCATTTTGG	2	47:C>A	1	-	NM_029870	377	TCAGAACAGACTCTGATGAGCACAGATCTCTTAGCCAACAGTTCTGNTCCAGAT	A930001N09Rik
SRR029642.12928468	-	3	2	32	TCTCTGAACCAGCCCAGCGTAAGCGGAATGGACCCGCCTTTTGGGGATGCCTTT	2		0	+	NM_029870	1431	TTGGCAGCGAGCATGAGCTTTCTGAAAATGAAGAGGAGGAAGAAGAGGAAGAGG	A930001N09Rik
SRR029642.3656031	-	3	1	17	ATATCAGCGACACGTTCTCTGAACCAGAACCGCAAATTTATTTTTTTTAAAAAG	2		0	+	NM_029870	201	TATTGTGAAAATCATCTTTGATCTTGGAATTAAAAGTAAAGCTGGAAAGGAATT	A930001N09Rik
SRR029642.7944499	-	3	2	34	TCTGAACCAGCCCAGCGTAAGCGGAATGGACCCGCCTTTTGGGGATGCCTTTCG	2		0	+	NM_029870	1431	TTGGCAGCGAGCATGAGCTTTCTGAAAATGAAGAGGAGGAAGAAGAGGAAGAGG	A930001N09Rik
SRR029642.4299424	+	3	2	22	AGCGACACGTTCTCTGAACCAGCCCAGCGTAAGCGGAATGGACCCGCATTTTGG	2	47:C>A	0	-	NM_029870	396	GCACAGATCTCTTAGCCAACAGTTCTGATCCAGATTTCATGTATGAGCTGGATA	A930001N09Rik
SRR029642.3656031	-	3	1	17	ATATCAGCGACACGTTCTCTGAACCAGAACCGCAAATTTATTTTTTTTAAAAAG	2		0	+	NM_029870	1431	TTGGCAGCGAGCATGAGCTTTCTGAAAATGAAGAGGAGGAAGAAGAGGAAGAGG	A930001N09Rik
SRR029642.5400400	+	3	2	8	GAGATGATGATATCAGCGACACGTTCTCTGAACCAGCCCAGCGTAAGCGGAATG	2		0	-	NM_029870	1593	AGAGAGGGAAAAGAAGGTACTTCTGGGAGTATAGTGAGCAGCTTACACCATCAC	A930001N09Rik
SRR029642.7944499	-	3	2	34	TCTGAACCAGCCCAGCGTAAGCGGAATGGACCCGCCTTTTGGGGATGCCTTTCG	2		0	+	NM_029870	1412	GAGGACCATGATGAAGGGTTTGGCAGCGAGCATGAGCTTTCTGAAAATGAAGAG	A930001N09Rik
SRR029642.4299424	+	3	2	22	AGCGACACGTTCTCTGAACCAGCCCAGCGTAAGCGGAATGGACCCGCATTTTGG	2	47:C>A	0	-	NM_029870	522	TGGAGACTTTCACAGATGTCCTGGACAATGAGGATGCTTTAACTTCAAACTGGG	A930001N09Rik
SRR029642.3656031	-	3	1	17	ATATCAGCGACACGTTCTCTGAACCAGAACCGCAAATTTATTTTTTTTAAAAAG	2		0	+	NM_029870	1412	GAGGACCATGATGAAGGGTTTGGCAGCGAGCATGAGCTTTCTGAAAATGAAGAG	A930001N09Rik
SRR029642.4299424	+	3	2	22	AGCGACACGTTCTCTGAACCAGCCCAGCGTAAGCGGAATGGACCCGCATTTTGG	2	47:C>A	0	-	NM_029870	1593	AGAGAGGGAAAAGAAGGTACTTCTGGGAGTATAGTGAGCAGCTTACACCATCAC	A930001N09Rik
SRR029642.20680965	-	3	1	1	GATGACAGAGATGATGATATCAGCGACACGTTCTCTGAACCAGAACCGCAAATT	2		0	+	NM_029870	1412	GAGGACCATGATGAAGGGTTTGGCAGCGAGCATGAGCTTTCTGAAAATGAAGAG	A930001N09Rik
SRR029642.7944499	-	3	2	34	TCTGAACCAGCCCAGCGTAAGCGGAATGGACCCGCCTTTTGGGGATGCCTTTCG	2		0	+	NM_029870	201	TATTGTGAAAATCATCTTTGATCTTGGAATTAAAAGTAAAGCTGGAAAGGAATT	A930001N09Rik
SRR029642.12928468	-	3	2	32	TCTCTGAACCAGCCCAGCGTAAGCGGAATGGACCCGCCTTTTGGGGATGCCTTT	2		0	+	NM_029870	1412	GAGGACCATGATGAAGGGTTTGGCAGCGAGCATGAGCTTTCTGAAAATGAAGAG	A930001N09Rik
SRR029642.12928468	-	3	2	32	TCTCTGAACCAGCCCAGCGTAAGCGGAATGGACCCGCCTTTTGGGGATGCCTTT	2		0	+	NM_029870	201	TATTGTGAAAATCATCTTTGATCTTGGAATTAAAAGTAAAGCTGGAAAGGAATT	A930001N09Rik
SRR029642.12928468	-	3	2	32	TCTCTGAACCAGCCCAGCGTAAGCGGAATGGACCCGCCTTTTGGGGATGCCTTT	2		0	+	NM_029870	1419	ATGATGAAGGGTTTGGCAGCGAGCATGAGCTTTCTGAAAATGAAGAGGAGGAAG	A930001N09Rik
SRR029642.20680965	-	3	1	1	GATGACAGAGATGATGATATCAGCGACACGTTCTCTGAACCAGAACCGCAAATT	2		0	+	NM_029870	201	TATTGTGAAAATCATCTTTGATCTTGGAATTAAAAGTAAAGCTGGAAAGGAATT	A930001N09Rik
SRR029642.7944499	-	3	2	34	TCTGAACCAGCCCAGCGTAAGCGGAATGGACCCGCCTTTTGGGGATGCCTTTCG	2		0	+	NM_029870	1419	ATGATGAAGGGTTTGGCAGCGAGCATGAGCTTTCTGAAAATGAAGAGGAGGAAG	A930001N09Rik
SRR029642.20680965	-	3	1	1	GATGACAGAGATGATGATATCAGCGACACGTTCTCTGAACCAGAACCGCAAATT	2		0	+	NM_029870	1399	TGAGTTTGATGATGAGGACCATGATGAAGGGTTTGGCAGCGAGCATGAGCTTTC	A930001N09Rik
SRR029642.3656031	-	3	1	17	ATATCAGCGACACGTTCTCTGAACCAGAACCGCAAATTTATTTTTTTTAAAAAG	2		0	+	NM_029870	1419	ATGATGAAGGGTTTGGCAGCGAGCATGAGCTTTCTGAAAATGAAGAGGAGGAAG	A930001N09Rik
SRR029642.3656031	-	3	1	17	ATATCAGCGACACGTTCTCTGAACCAGAACCGCAAATTTATTTTTTTTAAAAAG	2		0	+	NM_029870	1399	TGAGTTTGATGATGAGGACCATGATGAAGGGTTTGGCAGCGAGCATGAGCTTTC	A930001N09Rik
SRR029642.20680965	-	3	1	1	GATGACAGAGATGATGATATCAGCGACACGTTCTCTGAACCAGAACCGCAAATT	2		0	+	NM_029870	1419	ATGATGAAGGGTTTGGCAGCGAGCATGAGCTTTCTGAAAATGAAGAGGAGGAAG	A930001N09Rik
SRR029642.12928468	-	3	2	32	TCTCTGAACCAGCCCAGCGTAAGCGGAATGGACCCGCCTTTTGGGGATGCCTTT	2		0	+	NM_029870	1399	TGAGTTTGATGATGAGGACCATGATGAAGGGTTTGGCAGCGAGCATGAGCTTTC	A930001N09Rik
SRR029642.7944499	-	3	2	34	TCTGAACCAGCCCAGCGTAAGCGGAATGGACCCGCCTTTTGGGGATGCCTTTCG	2		0	+	NM_029870	1399	TGAGTTTGATGATGAGGACCATGATGAAGGGTTTGGCAGCGAGCATGAGCTTTC	A930001N09Rik
SRR029642.5400400	+	3	2	8	GAGATGATGATATCAGCGACACGTTCTCTGAACCAGCCCAGCGTAAGCGGAATG	2		1	-	NM_029870	377	TCAGAACAGACTCTGATGAGCACAGATCTCTTAGCCAACAGTTCTGNTCCAGAT	A930001N09Rik
SRR029642.4299424	+	3	2	22	AGCGACACGTTCTCTGAACCAGCCCAGCGTAAGCGGAATGGACCCGCATTTTGG	2	47:C>A	0	-	NM_029870	1606	AAGGTACTTCTGGGAGTATAGTGAGCAGCTTACACCATCACAGCAAGAGAGGAT	A930001N09Rik
SRR029642.5400400	+	3	2	8	GAGATGATGATATCAGCGACACGTTCTCTGAACCAGCCCAGCGTAAGCGGAATG	2		0	-	NM_029870	522	TGGAGACTTTCACAGATGTCCTGGACAATGAGGATGCTTTAACTTCAAACTGGG	A930001N09Rik
SRR029642.5400400	+	3	2	8	GAGATGATGATATCAGCGACACGTTCTCTGAACCAGCCCAGCGTAAGCGGAATG	2		0	-	NM_029870	1606	AAGGTACTTCTGGGAGTATAGTGAGCAGCTTACACCATCACAGCAAGAGAGGAT	A930001N09Rik
SRR029642.4299424	+	3	2	22	AGCGACACGTTCTCTGAACCAGCCCAGCGTAAGCGGAATGGACCCGCATTTTGG	2	47:C>A	2	-	NM_029870	1601	ANAAGAAGGTACTTCTGGGAGGATAGTGAGCAGCTTACACCATCACAGCAAGAG	A930001N09Rik
SRR029642.5400400	+	3	2	8	GAGATGATGATATCAGCGACACGTTCTCTGAACCAGCCCAGCGTAAGCGGAATG	2		2	-	NM_029870	1601	ANAAGAAGGTACTTCTGGGAGGATAGTGAGCAGCTTACACCATCACAGCAAGAG	A930001N09Rik
SRR029642.5400400	+	3	2	8	GAGATGATGATATCAGCGACACGTTCTCTGAACCAGCCCAGCGTAAGCGGAATG	2		0	-	NM_029870	396	GCACAGATCTCTTAGCCAACAGTTCTGATCCAGATTTCATGTATGAGCTGGATA	A930001N09Rik
SRR029642.14111827	-	8	1	33	CTAACATTCAGATCAGCTCGAACGGGTCTTTTTACGACTTGGCCATGCTGAAAC	2		0	+	NM_172381	1166	AGTTCTAAAGCCGGAGCTGAAAAGAGACCCAGTCAGTACTAGAGTGAAGTTAAA	AI314180
SRR029642.10133241	-	8	1	33	CTAACATTCAGATCAGCTCGAACGGGTCTTTTTACGACTTGGCCATGCTGAAAC	2		0	+	NM_172381	1166	AGTTCTAAAGCCGGAGCTGAAAAGAGACCCAGTCAGTACTAGAGTGAAGTTAAA	AI314180
SRR029642.8137964	-	22	17	28	GATGGATTCTGTGGAGATAGTTCTGTACTTGCGCATGTGCCTGGCTCATAGTGC	2		0	+	NM_172381	1166	AGTTCTAAAGCCGGAGCTGAAAAGAGACCCAGTCAGTACTAGAGTGAAGTTAAA	AI314180
SRR029642.8137964	-	22	17	28	GATGGATTCTGTGGAGATAGTTCTGTACTTGCGCATGTGCCTGGCTCATAGTGC	2		0	+	NM_172381	2778	AAGATGAAAGAACGAGCAATCCAAACACTGGGCTATTTTCCTGTTGGAGATGGG	AI314180
SRR029642.10133241	-	8	1	33	CTAACATTCAGATCAGCTCGAACGGGTCTTTTTACGACTTGGCCATGCTGAAAC	2		0	+	NM_172381	2778	AAGATGAAAGAACGAGCAATCCAAACACTGGGCTATTTTCCTGTTGGAGATGGG	AI314180
SRR029642.14111827	-	8	1	33	CTAACATTCAGATCAGCTCGAACGGGTCTTTTTACGACTTGGCCATGCTGAAAC	2		0	+	NM_172381	2778	AAGATGAAAGAACGAGCAATCCAAACACTGGGCTATTTTCCTGTTGGAGATGGG	AI314180
SRR029642.14111827	-	8	1	33	CTAACATTCAGATCAGCTCGAACGGGTCTTTTTACGACTTGGCCATGCTGAAAC	2		1	+	NM_172381	1172	AAAGCCGGAGCTGAAAAGGGACCCAGTCAGTACTAGAGTGAAGTTAAAGATTGT	AI314180
SRR029642.10133241	-	8	1	33	CTAACATTCAGATCAGCTCGAACGGGTCTTTTTACGACTTGGCCATGCTGAAAC	2		1	+	NM_172381	1172	AAAGCCGGAGCTGAAAAGGGACCCAGTCAGTACTAGAGTGAAGTTAAAGATTGT	AI314180
SRR029642.8137964	-	22	17	28	GATGGATTCTGTGGAGATAGTTCTGTACTTGCGCATGTGCCTGGCTCATAGTGC	2		1	+	NM_172381	1172	AAAGCCGGAGCTGAAAAGGGACCCAGTCAGTACTAGAGTGAAGTTAAAGATTGT	AI314180
SRR029642.8622061	+	4	1	33	CCCCTCTTCAGTAACCCAACAGGAAAAGACGCCGCCACCTCGGCCTAACCTGCT	2		0	-	NM_001033139	432	CAGCAAGTGTCATGGGAGCAGGAGTTCCTGGTGGGGAACAGCCCAGGAGGCAGT	AI846148
SRR029642.11854891	+	7	6	27	AGTGTCTCTGGACCAAGATAACCAAGAAGAAAAACACTCCCCAGTGTTCATTGA	2		0	-	NM_001033532	668	CGGTCAGACCAAGGCGAGGCCTAAGTCAGCAAACCAGGTCTCAGAATCGTTTAC	AW554918
SRR029642.688238	-	4	1	3	ATTGAATGCCAATGTCTGGTCCAATGTCGTGATGAAGAGTGATATCCTTGGGAC	2		0	+	NM_025857	445	TGGCTTTGAGTTGGTGGAACTCAACCCAGAGGAGCTGCCCGAGGAGGACGATGA	Aagab
SRR029642.1299556	+	4	1	13	AATGTCTGGTCCAATGTCGTGATGAAGAGTGATATCCTTGGGACAGAAGATGCT	2		0	-	NM_025857	192	ATAACAAGTACTATTCCGCAGAGATCAACCTGTGCGTGGTGCCAAGCAAGTTCC	Aagab
SRR029642.16464361	+	4	1	23	CCAATGTCGTGATGAAGAGTGATATCCTTGGGACAGAAGATGCTGTTGTGGAAG	2		0	-	NM_025857	192	ATAACAAGTACTATTCCGCAGAGATCAACCTGTGCGTGGTGCCAAGCAAGTTCC	Aagab
SRR029642.688238	-	4	1	3	ATTGAATGCCAATGTCTGGTCCAATGTCGTGATGAAGAGTGATATCCTTGGGAC	2		0	+	NM_025857	472	AGAGGAGCTGCCCGAGGAGGACGATGACTTCCCTGAATCTACAGGTGTAAAGCG	Aagab
SRR029642.16464361	+	4	1	23	CCAATGTCGTGATGAAGAGTGATATCCTTGGGACAGAAGATGCTGTTGTGGAAG	2		0	-	NM_025857	198	AGTACTATTCCGCAGAGATCAACCTGTGCGTGGTGCCAAGCAAGTTCCTGGTCA	Aagab
SRR029642.1299556	+	4	1	13	AATGTCTGGTCCAATGTCGTGATGAAGAGTGATATCCTTGGGACAGAAGATGCT	2		0	-	NM_025857	198	AGTACTATTCCGCAGAGATCAACCTGTGCGTGGTGCCAAGCAAGTTCCTGGTCA	Aagab
SRR029642.5263834	+	9	4	32	AGAATCCATCAGCTCATTGTGATGGACTGTATGAAGATGTCAACTGTCTGATAG	2		0	-	NM_013851	763	GCTGCCATCATAGAAACCACAACAAACCATTCAGTGATGGAGGAACTGCTATCA	Abca8b
SRR029642.13637034	+	9	4	31	AAGAATCCATCAGCTCATTGTGATGGACTGTATGAAGATGTCAACTGTCTGATA	2		0	-	NM_013851	754	GCCATCAATGCTGCCATCATAGAAACCACAACAAACCATTCAGTGATGGAGGAA	Abca8b
SRR029642.5263834	+	9	4	32	AGAATCCATCAGCTCATTGTGATGGACTGTATGAAGATGTCAACTGTCTGATAG	2		0	-	NM_013851	754	GCCATCAATGCTGCCATCATAGAAACCACAACAAACCATTCAGTGATGGAGGAA	Abca8b
SRR029642.13637034	+	9	4	31	AAGAATCCATCAGCTCATTGTGATGGACTGTATGAAGATGTCAACTGTCTGATA	2		0	-	NM_013851	763	GCTGCCATCATAGAAACCACAACAAACCATTCAGTGATGGAGGAACTGCTATCA	Abca8b
SRR029642.5263834	+	9	4	32	AGAATCCATCAGCTCATTGTGATGGACTGTATGAAGATGTCAACTGTCTGATAG	2		2	-	NM_013851	738	GGGGGCTCTTCAAGCTGCCATCAATGCTGCCATCATAGAAACCACAACAAACCA	Abca8b
SRR029642.13637034	+	9	4	31	AAGAATCCATCAGCTCATTGTGATGGACTGTATGAAGATGTCAACTGTCTGATA	2		2	-	NM_013851	738	GGGGGCTCTTCAAGCTGCCATCAATGCTGCCATCATAGAAACCACAACAAACCA	Abca8b
SRR029642.18847432	+	9	4	8	GGTGTCCCCAGAATTCCACGGGAAAGAATCCATCAGCTCATTGTGATGGACTGT	2		0	-	NM_013851	763	GCTGCCATCATAGAAACCACAACAAACCATTCAGTGATGGAGGAACTGCTATCA	Abca8b
SRR029642.18847432	+	9	4	8	GGTGTCCCCAGAATTCCACGGGAAAGAATCCATCAGCTCATTGTGATGGACTGT	2		2	-	NM_013851	738	GGGGGCTCTTCAAGCTGCCATCAATGCTGCCATCATAGAAACCACAACAAACCA	Abca8b
SRR029642.5263834	+	9	4	32	AGAATCCATCAGCTCATTGTGATGGACTGTATGAAGATGTCAACTGTCTGATAG	2		2	-	NM_013851	5048	AGCTCCTCCCACAGGAAGAGGCTTAAGCCAAAAATATCTCTCCGCTTCCGTCAT	Abca8b
SRR029642.18847432	+	9	4	8	GGTGTCCCCAGAATTCCACGGGAAAGAATCCATCAGCTCATTGTGATGGACTGT	2		2	-	NM_013851	5048	AGCTCCTCCCACAGGAAGAGGCTTAAGCCAAAAATATCTCTCCGCTTCCGTCAT	Abca8b
SRR029642.18847432	+	9	4	8	GGTGTCCCCAGAATTCCACGGGAAAGAATCCATCAGCTCATTGTGATGGACTGT	2		0	-	NM_013851	754	GCCATCAATGCTGCCATCATAGAAACCACAACAAACCATTCAGTGATGGAGGAA	Abca8b
SRR029642.13637034	+	9	4	31	AAGAATCCATCAGCTCATTGTGATGGACTGTATGAAGATGTCAACTGTCTGATA	2		2	-	NM_013851	5048	AGCTCCTCCCACAGGAAGAGGCTTAAGCCAAAAATATCTCTCCGCTTCCGTCAT	Abca8b
SRR029642.17786008	-	11	10	25	GGTGTGCACATCTTTCCTGAGCCTGGGCCCTTCTGTGCTGGCTGGAGTGGCTGT	2	43:C>T	0	+	NM_008576	1597	GGGAGCTGGCCTTCCAGGACAAAGTCATGAGCATCAGGCAGGAGGAGCTCAAGG	Abcc1
SRR029642.1601499	+	9	7	26	CTCTACTTCCTGTGGCTGGCAGCCTGTACGGATTGTGTATGCCCCTCCCAAAGA	2		0	-	NM_008576	929	GGAGGCACTGATTGTCAAGTCACCCCACAAGGATCGGGAGCCCTCTCTGTTCAA	Abcc1
SRR029642.11208396	+	5	2	32	ACACCATTCACGATTCCAGATCCTTTGGGAAGAAGAAATAAAGAGGGTAGGGCC	2		2	-	NM_172912	380	GAAATTCCAGAGAACCCGAGTTCTAATGGACTTTGTAGCCAACATCCTGTGCAT	Abcc12
SRR029642.10632255	-	20	12	24	GATCTTGGTACCCAAAATTGCTCCAAAAAGGTTCCCAGAGTTTCCTGAGGCAAA	2		0	+	NM_001014423	1702	AGGTCACCACCGCCTCCGCCGTCCTAAAACCACACGTAGTCCAGAAGTACCCAA	Abi3bp
SRR029642.3444086	+	17	12	4	AAACGACAATCAACACCCAAACCGCCAAGAGTCAAGCCTGCTCCAAAAAGGTTC	2		0	-	NM_001014422	1263	GGGGTTCCTGGGCTTCAAGTGAGGAGCCATGGGTGGTACCTGGAGCTAAAACAT	Abi3bp
SRR029642.17432252	+	16	16	19	GGCTATGAGATGTCCTTCAATGGCTCTCCAGAGTGGGATTGGCCGGCTGATCCT	2		0	-	NM_198649	2196	GGATCCTTGGACCCCTCCACGGAGCTCCACCAGCAGTCGGGAGGCCCTGCACAC	Ablim3
SRR029642.14173304	-	38	31	30	CAGGAGGAAATGAGAAAGCTACTTTGGTTGAGCATGGCAGCCGGCGACTTACGT	2	14:T>G	0	+	NM_133360	4888	TCCTTCGCCTCCTTTGCCTTCCGACATCCTGACGTATACTGAACTGGTGTTGGA	Acaca
SRR029642.4306816	+	38	31	23	AGACTTCCAGGAGGAAATGAGAAAGCTACTTTGGTTGAGCATGGCATCCGGCGA	2		0	-	NM_133360	4045	CTGTGAGGTGGATCAGAGATTTCATAGAGAATTCCCCAAATTTTTCACATTCCG	Acaca
SRR029642.352562	-	3	1	34	TTTCCACACAGGCTGCTTTGGAAGAGGTAGAAGGAGATGTGGCTGAGCTGNAAC	2	3:G>N	0	+	NM_030138	415	AAACAGTTCATGAATGGGATCCGAGACCTGGCCCAGTATTCTAGCAATGATGCT	Acap2
SRR029642.3402680	+	3	1	23	GAAATGATCAATTTCCACACAGGCTGCTTTGGAAGAGGTAGAAGGAGATGTGGG	2	53:C>G	1	-	NM_030138	388	ACTGGCAAAGCCTTTTGTGTTGCAAATAAACAGTTCAGGAATGGGATCCGAGAC	Acap2
SRR029642.10785297	-	3	1	8	TCTGACAGTCTTCAGGAAATGATCAATTTCCACACAGGCTGCTTTGGAAGAGGT	2		0	+	NM_030138	415	AAACAGTTCATGAATGGGATCCGAGACCTGGCCCAGTATTCTAGCAATGATGCT	Acap2
SRR029642.17544652	+	3	1	32	AATTTCCACACAGGCTGCTTTGGAAGAGGTAGAAGGAGATGTGGCTGGGCTGGG	2	47:A>G,53:A>G	1	-	NM_030138	385	GACACTGGCAAAGCCTTTTGTGTTGCAAATAAACAGTTCATGAATGGGATCAGA	Acap2
SRR029642.352562	-	3	1	34	TTTCCACACAGGCTGCTTTGGAAGAGGTAGAAGGAGATGTGGCTGAGCTGNAAC	2	3:G>N	0	+	NM_030138	401	TTTGTGTTGCAAATAAACAGTTCATGAATGGGATCCGAGACCTGGCCCAGTATT	Acap2
SRR029642.3402680	+	3	1	23	GAAATGATCAATTTCCACACAGGCTGCTTTGGAAGAGGTAGAAGGAGATGTGGG	2	53:C>G	1	-	NM_030138	385	GACACTGGCAAAGCCTTTTGTGTTGCAAATAAACAGTTCATGAATGGGATCAGA	Acap2
SRR029642.10785297	-	3	1	8	TCTGACAGTCTTCAGGAAATGATCAATTTCCACACAGGCTGCTTTGGAAGAGGT	2		0	+	NM_030138	401	TTTGTGTTGCAAATAAACAGTTCATGAATGGGATCCGAGACCTGGCCCAGTATT	Acap2
SRR029642.17544652	+	3	1	32	AATTTCCACACAGGCTGCTTTGGAAGAGGTAGAAGGAGATGTGGCTGGGCTGGG	2	47:A>G,53:A>G	1	-	NM_030138	388	ACTGGCAAAGCCTTTTGTGTTGCAAATAAACAGTTCAGGAATGGGATCCGAGAC	Acap2
SRR029642.11707568	+	6	3	31	ATCTCAGTGAAAGGGATTCCAAAAGAAGAAGTGAAGGAAGTCTACATGGGCAAT	2		0	-	NM_144784	379	GGCAAGCAACACTGGGCGCAGGTTTACCTATTTCCACTCCATGCACCACAGTAA	Acat1
SRR029642.19298212	-	2	1	17	AAACTAGATCCAGGATGGAATCCTCAGGTCAAAGTTGGAAATTGCAATACTCCT	2		0	+	NM_026683	767	AAACCAAATTTCTTTGATTTTGAAGGAAAGCAAAAATGGGAGGCATGGAAAGCC	Acbd6
SRR029642.12565995	+	3	1	8	AATTGATCATTCCATCCAGGTTGATTTCAACAGAAGTTTTTCAGAGACACGTGA	2		1	-	NM_007386	328	CTTGCTGAGCCCTTGAACGCTGCCCAACCAGGAAAGAGGTTCTTCAACTTGAAT	Aco1
SRR029642.7902053	+	3	1	8	AATTGATCATTCCATCCAGGTTGATTTCAACAGAAGTTTTTCAGAGACACGTGA	2		1	-	NM_007386	328	CTTGCTGAGCCCTTGAACGCTGCCCAACCAGGAAAGAGGTTCTTCAACTTGAAT	Aco1
SRR029642.12565995	+	3	1	8	AATTGATCATTCCATCCAGGTTGATTTCAACAGAAGTTTTTCAGAGACACGTGA	2		0	-	NM_007386	328	CTTGCTGAGCCCTTGGACGCTGCCCAACCAGGAAAGAGGTTCTTCAACTTGAAT	Aco1
SRR029642.7902053	+	3	1	8	AATTGATCATTCCATCCAGGTTGATTTCAACAGAAGTTTTTCAGAGACACGTGA	2		0	-	NM_007386	328	CTTGCTGAGCCCTTGGACGCTGCCCAACCAGGAAAGAGGTTCTTCAACTTGAAT	Aco1
SRR029642.10022401	+	3	1	9	AATGATGATGGCTTTCCCTTCCCCGAGTGTGGAAGGAATAAAGGAGCTGCCCCC	2	38:C>T	2	-	NM_007394	114	GGTGGATGAGCAGAGAGAAGCCGGCCTCTGGTGCTCTGGAGCTGGTCTGCCCAT	Acvr1
SRR029642.16848921	-	3	1	23	CCTGTACTTGTTCCTACTCAAGTGCTATACTTGGCAGATCAGAAACTCAGGAGT	2		0	+	NM_007396	1071	TACAACATTCTGCTGTATTCCTTGGTACCACTAATGTTAATTGCAGGAATTGTC	Acvr2a
SRR029642.3487896	-	3	1	26	GTACTTGTTCCTACTCAAGTGCTATACTTGGCAGATCAGAAACTCAGGAGTGTC	2		0	+	NM_007396	1071	TACAACATTCTGCTGTATTCCTTGGTACCACTAATGTTAATTGCAGGAATTGTC	Acvr2a
SRR029642.16848921	-	3	1	23	CCTGTACTTGTTCCTACTCAAGTGCTATACTTGGCAGATCAGAAACTCAGGAGT	2		0	+	NM_007396	1074	AACATTCTGCTGTATTCCTTGGTACCACTAATGTTAATTGCAGGAATTGTCATT	Acvr2a
SRR029642.3487896	-	3	1	26	GTACTTGTTCCTACTCAAGTGCTATACTTGGCAGATCAGAAACTCAGGAGTGTC	2		0	+	NM_007396	1074	AACATTCTGCTGTATTCCTTGGTACCACTAATGTTAATTGCAGGAATTGTCATT	Acvr2a
SRR029642.17640906	+	13	11	22	TGTCAGGTCATCTTTGGTTCAACGGGTCCAGAAACTTTAGCAGTTGCAGTGCGG	2		0	-	NM_007404	1344	CTGCTTAACATCCCGAAGCCCGACGAAGCCTACAGCGCGCCCTCCTGTGGTAAT	Adam9
SRR029642.2963566	+	15	10	6	ATGCACCAGGACCCACGAATGAGACGCTGGTCTTTGAAGACATTTGCAAGTCAC	2		2	-	NM_172466	2034	ATGCCGGCAGGAGAGGGGACCGCTTGTGGCTTGAGTATGTGGTGTCGGCAAGGC	Adamts18
SRR029642.15039571	-	10	1	22	ACCCCGCCAATGCAAATATGGGGTTAAAAAGTGGCCACCATATTTAAGTGACCT	2	52:T>C	0	+	NM_001081020	1804	AATGAGCCTCCAAAGCGTGACTTTCTTTATCCAGCTGTGGCCCCAGGTCAGGTG	Adamts6
SRR029642.10672958	+	7	4	15	ATACCGACAAAACAGGCCTCTCCTTAGTGGCTTGGACACCAAACAAGCGCAGGT	2		1	-	NM_052977	1586	GCACATCAGTGACCAGGGGCTGGTTGTCAACGACTGGCATGCTGAGATCGTGGC	Adarb2
SRR029642.18994967	-	3	1	14	CTCTTTGGCAAGTTCGATGAGTTAGCCACGCTCGGTGCCAATGCCCTGCTCTTC	2		0	+	NM_009622	1008	AATGTGAGCATCCTGTTTGCAGACATCGTGGGTTTCACAGGTCTGGCGTCCCAG	Adcy1
SRR029642.16781742	-	3	1	20	GGCAAGTTCGATGAGTTAGCCACGCTCGGTGCCAATGCCCTGCTCTTCTTTGGT	2		0	+	NM_009622	1002	CATGACAATGTGAGCATCCTGTTTGCAGACATCGTGGGTTTCACAGGTCTGGCG	Adcy1
SRR029642.15449781	-	4	1	34	ATACCATCACCTCGGTGCCAATGCCCTGCTCTTCTTGGGTGTGAACATGTATGG	2	17:T>G	0	+	NM_009622	1008	AATGTGAGCATCCTGTTTGCAGACATCGTGGGTTTCACAGGTCTGGCGTCCCAG	Adcy1
SRR029642.15449781	-	4	1	34	ATACCATCACCTCGGTGCCAATGCCCTGCTCTTCTTGGGTGTGAACATGTATGG	2	17:T>G	0	+	NM_009622	1002	CATGACAATGTGAGCATCCTGTTTGCAGACATCGTGGGTTTCACAGGTCTGGCG	Adcy1
SRR029642.14470444	-	3	2	16	CTTTGGCAAGTTCGATGAGTTAGCCACGGAACGGTTGCTCATGAGCCTCTTGCC	2		0	+	NM_009622	1008	AATGTGAGCATCCTGTTTGCAGACATCGTGGGTTTCACAGGTCTGGCGTCCCAG	Adcy1
SRR029642.18994967	-	3	1	14	CTCTTTGGCAAGTTCGATGAGTTAGCCACGCTCGGTGCCAATGCCCTGCTCTTC	2		0	+	NM_009622	1002	CATGACAATGTGAGCATCCTGTTTGCAGACATCGTGGGTTTCACAGGTCTGGCG	Adcy1
SRR029642.7758224	-	3	1	22	CAAGTTCGATGAGTTAGCCACGCTCGGTGCCAATGCCCTGCTCTTCTTTGGTGT	2		0	+	NM_009622	1008	AATGTGAGCATCCTGTTTGCAGACATCGTGGGTTTCACAGGTCTGGCGTCCCAG	Adcy1
SRR029642.14470444	-	3	2	16	CTTTGGCAAGTTCGATGAGTTAGCCACGGAACGGTTGCTCATGAGCCTCTTGCC	2		0	+	NM_009622	1002	CATGACAATGTGAGCATCCTGTTTGCAGACATCGTGGGTTTCACAGGTCTGGCG	Adcy1
SRR029642.7621176	-	3	1	23	AAGTTCGATGAGTTAGCCACGCTCGGTGCCAATGCCCTGCTCTTCTTTGGTGTG	2		0	+	NM_009622	1008	AATGTGAGCATCCTGTTTGCAGACATCGTGGGTTTCACAGGTCTGGCGTCCCAG	Adcy1
SRR029642.7758224	-	3	1	22	CAAGTTCGATGAGTTAGCCACGCTCGGTGCCAATGCCCTGCTCTTCTTTGGTGT	2		0	+	NM_009622	1002	CATGACAATGTGAGCATCCTGTTTGCAGACATCGTGGGTTTCACAGGTCTGGCG	Adcy1
SRR029642.5303530	-	3	1	14	CTCTTTGGCAAGTTCGATGAGTTAGCCACGCTCGGTGCCAATGCCCTGCTCTTC	2		0	+	NM_009622	1008	AATGTGAGCATCCTGTTTGCAGACATCGTGGGTTTCACAGGTCTGGCGTCCCAG	Adcy1
SRR029642.2559147	-	3	1	26	TTCGATGAGTTAGCCACGCTCGGTGCCAATGCCCTGCTCTTCTTTGGTGTGAAC	2		0	+	NM_009622	1002	CATGACAATGTGAGCATCCTGTTTGCAGACATCGTGGGTTTCACAGGTCTGGCG	Adcy1
SRR029642.2559147	-	3	1	26	TTCGATGAGTTAGCCACGCTCGGTGCCAATGCCCTGCTCTTCTTTGGTGTGAAC	2		0	+	NM_009622	1008	AATGTGAGCATCCTGTTTGCAGACATCGTGGGTTTCACAGGTCTGGCGTCCCAG	Adcy1
SRR029642.5303530	-	3	1	14	CTCTTTGGCAAGTTCGATGAGTTAGCCACGCTCGGTGCCAATGCCCTGCTCTTC	2		0	+	NM_009622	1002	CATGACAATGTGAGCATCCTGTTTGCAGACATCGTGGGTTTCACAGGTCTGGCG	Adcy1
SRR029642.16781742	-	3	1	20	GGCAAGTTCGATGAGTTAGCCACGCTCGGTGCCAATGCCCTGCTCTTCTTTGGT	2		0	+	NM_009622	1008	AATGTGAGCATCCTGTTTGCAGACATCGTGGGTTTCACAGGTCTGGCGTCCCAG	Adcy1
SRR029642.7621176	-	3	1	23	AAGTTCGATGAGTTAGCCACGCTCGGTGCCAATGCCCTGCTCTTCTTTGGTGTG	2		0	+	NM_009622	1002	CATGACAATGTGAGCATCCTGTTTGCAGACATCGTGGGTTTCACAGGTCTGGCG	Adcy1
SRR029642.18994967	-	3	1	14	CTCTTTGGCAAGTTCGATGAGTTAGCCACGCTCGGTGCCAATGCCCTGCTCTTC	2		0	+	NM_009622	1010	TGTGAGCATCCTGTTTGCAGACATCGTGGGTTTCACAGGTCTGGCGTCCCAGTG	Adcy1
SRR029642.16781742	-	3	1	20	GGCAAGTTCGATGAGTTAGCCACGCTCGGTGCCAATGCCCTGCTCTTCTTTGGT	2		0	+	NM_009622	1010	TGTGAGCATCCTGTTTGCAGACATCGTGGGTTTCACAGGTCTGGCGTCCCAGTG	Adcy1
SRR029642.15449781	-	4	1	34	ATACCATCACCTCGGTGCCAATGCCCTGCTCTTCTTGGGTGTGAACATGTATGG	2	17:T>G	0	+	NM_009622	1010	TGTGAGCATCCTGTTTGCAGACATCGTGGGTTTCACAGGTCTGGCGTCCCAGTG	Adcy1
SRR029642.14470444	-	3	2	16	CTTTGGCAAGTTCGATGAGTTAGCCACGGAACGGTTGCTCATGAGCCTCTTGCC	2		0	+	NM_009622	1010	TGTGAGCATCCTGTTTGCAGACATCGTGGGTTTCACAGGTCTGGCGTCCCAGTG	Adcy1
SRR029642.18994967	-	3	1	14	CTCTTTGGCAAGTTCGATGAGTTAGCCACGCTCGGTGCCAATGCCCTGCTCTTC	2		1	+	NM_009622	1009	ATGTGAGCATCCTGTTTGCAGACATCGTGGGTTTCACAGGTCTGGCGTCTCAGT	Adcy1
SRR029642.16781742	-	3	1	20	GGCAAGTTCGATGAGTTAGCCACGCTCGGTGCCAATGCCCTGCTCTTCTTTGGT	2		1	+	NM_009622	1009	ATGTGAGCATCCTGTTTGCAGACATCGTGGGTTTCACAGGTCTGGCGTCTCAGT	Adcy1
SRR029642.15449781	-	4	1	34	ATACCATCACCTCGGTGCCAATGCCCTGCTCTTCTTGGGTGTGAACATGTATGG	2	17:T>G	1	+	NM_009622	1009	ATGTGAGCATCCTGTTTGCAGACATCGTGGGTTTCACAGGTCTGGCGTCTCAGT	Adcy1
SRR029642.7758224	-	3	1	22	CAAGTTCGATGAGTTAGCCACGCTCGGTGCCAATGCCCTGCTCTTCTTTGGTGT	2		0	+	NM_009622	1010	TGTGAGCATCCTGTTTGCAGACATCGTGGGTTTCACAGGTCTGGCGTCCCAGTG	Adcy1
SRR029642.14470444	-	3	2	16	CTTTGGCAAGTTCGATGAGTTAGCCACGGAACGGTTGCTCATGAGCCTCTTGCC	2		1	+	NM_009622	1009	ATGTGAGCATCCTGTTTGCAGACATCGTGGGTTTCACAGGTCTGGCGTCTCAGT	Adcy1
SRR029642.7758224	-	3	1	22	CAAGTTCGATGAGTTAGCCACGCTCGGTGCCAATGCCCTGCTCTTCTTTGGTGT	2		1	+	NM_009622	1009	ATGTGAGCATCCTGTTTGCAGACATCGTGGGTTTCACAGGTCTGGCGTCTCAGT	Adcy1
SRR029642.7621176	-	3	1	23	AAGTTCGATGAGTTAGCCACGCTCGGTGCCAATGCCCTGCTCTTCTTTGGTGTG	2		0	+	NM_009622	1010	TGTGAGCATCCTGTTTGCAGACATCGTGGGTTTCACAGGTCTGGCGTCCCAGTG	Adcy1
SRR029642.7621176	-	3	1	23	AAGTTCGATGAGTTAGCCACGCTCGGTGCCAATGCCCTGCTCTTCTTTGGTGTG	2		1	+	NM_009622	1009	ATGTGAGCATCCTGTTTGCAGACATCGTGGGTTTCACAGGTCTGGCGTCTCAGT	Adcy1
SRR029642.5303530	-	3	1	14	CTCTTTGGCAAGTTCGATGAGTTAGCCACGCTCGGTGCCAATGCCCTGCTCTTC	2		1	+	NM_009622	1009	ATGTGAGCATCCTGTTTGCAGACATCGTGGGTTTCACAGGTCTGGCGTCTCAGT	Adcy1
SRR029642.5303530	-	3	1	14	CTCTTTGGCAAGTTCGATGAGTTAGCCACGCTCGGTGCCAATGCCCTGCTCTTC	2		0	+	NM_009622	1010	TGTGAGCATCCTGTTTGCAGACATCGTGGGTTTCACAGGTCTGGCGTCCCAGTG	Adcy1
SRR029642.2559147	-	3	1	26	TTCGATGAGTTAGCCACGCTCGGTGCCAATGCCCTGCTCTTCTTTGGTGTGAAC	2		0	+	NM_009622	1010	TGTGAGCATCCTGTTTGCAGACATCGTGGGTTTCACAGGTCTGGCGTCCCAGTG	Adcy1
SRR029642.2559147	-	3	1	26	TTCGATGAGTTAGCCACGCTCGGTGCCAATGCCCTGCTCTTCTTTGGTGTGAAC	2		1	+	NM_009622	1009	ATGTGAGCATCCTGTTTGCAGACATCGTGGGTTTCACAGGTCTGGCGTCTCAGT	Adcy1
SRR029642.18994967	-	3	1	14	CTCTTTGGCAAGTTCGATGAGTTAGCCACGCTCGGTGCCAATGCCCTGCTCTTC	2		0	+	NM_009622	1149	AAGATCCTTGGTGACTGCTACTACTGTGTGTCTGGCCTCACCCAGCCTAAGACG	Adcy1
SRR029642.16781742	-	3	1	20	GGCAAGTTCGATGAGTTAGCCACGCTCGGTGCCAATGCCCTGCTCTTCTTTGGT	2		0	+	NM_009622	1149	AAGATCCTTGGTGACTGCTACTACTGTGTGTCTGGCCTCACCCAGCCTAAGACG	Adcy1
SRR029642.15449781	-	4	1	34	ATACCATCACCTCGGTGCCAATGCCCTGCTCTTCTTGGGTGTGAACATGTATGG	2	17:T>G	0	+	NM_009622	1149	AAGATCCTTGGTGACTGCTACTACTGTGTGTCTGGCCTCACCCAGCCTAAGACG	Adcy1
SRR029642.14470444	-	3	2	16	CTTTGGCAAGTTCGATGAGTTAGCCACGGAACGGTTGCTCATGAGCCTCTTGCC	2		0	+	NM_009622	1149	AAGATCCTTGGTGACTGCTACTACTGTGTGTCTGGCCTCACCCAGCCTAAGACG	Adcy1
SRR029642.7758224	-	3	1	22	CAAGTTCGATGAGTTAGCCACGCTCGGTGCCAATGCCCTGCTCTTCTTTGGTGT	2		0	+	NM_009622	1149	AAGATCCTTGGTGACTGCTACTACTGTGTGTCTGGCCTCACCCAGCCTAAGACG	Adcy1
SRR029642.7621176	-	3	1	23	AAGTTCGATGAGTTAGCCACGCTCGGTGCCAATGCCCTGCTCTTCTTTGGTGTG	2		0	+	NM_009622	1149	AAGATCCTTGGTGACTGCTACTACTGTGTGTCTGGCCTCACCCAGCCTAAGACG	Adcy1
SRR029642.5303530	-	3	1	14	CTCTTTGGCAAGTTCGATGAGTTAGCCACGCTCGGTGCCAATGCCCTGCTCTTC	2		0	+	NM_009622	1149	AAGATCCTTGGTGACTGCTACTACTGTGTGTCTGGCCTCACCCAGCCTAAGACG	Adcy1
SRR029642.2559147	-	3	1	26	TTCGATGAGTTAGCCACGCTCGGTGCCAATGCCCTGCTCTTCTTTGGTGTGAAC	2		0	+	NM_009622	1149	AAGATCCTTGGTGACTGCTACTACTGTGTGTCTGGCCTCACCCAGCCTAAGACG	Adcy1
SRR029642.15449781	-	4	1	34	ATACCATCACCTCGGTGCCAATGCCCTGCTCTTCTTGGGTGTGAACATGTATGG	2	17:T>G	0	+	NM_009622	1010	TGTGAGCATCCTGTTTGCAGACATCGTGGGTTTCACAGGTCTGGCGTCCCAGTG	Adcy1
SRR029642.14470444	-	3	2	16	CTTTGGCAAGTTCGATGAGTTAGCCACGGAACGGTTGCTCATGAGCCTCTTGCC	2		0	+	NM_009622	1010	TGTGAGCATCCTGTTTGCAGACATCGTGGGTTTCACAGGTCTGGCGTCCCAGTG	Adcy1
SRR029642.7758224	-	3	1	22	CAAGTTCGATGAGTTAGCCACGCTCGGTGCCAATGCCCTGCTCTTCTTTGGTGT	2		0	+	NM_009622	1010	TGTGAGCATCCTGTTTGCAGACATCGTGGGTTTCACAGGTCTGGCGTCCCAGTG	Adcy1
SRR029642.18994967	-	3	1	14	CTCTTTGGCAAGTTCGATGAGTTAGCCACGCTCGGTGCCAATGCCCTGCTCTTC	2		0	+	NM_009622	1010	TGTGAGCATCCTGTTTGCAGACATCGTGGGTTTCACAGGTCTGGCGTCCCAGTG	Adcy1
SRR029642.16781742	-	3	1	20	GGCAAGTTCGATGAGTTAGCCACGCTCGGTGCCAATGCCCTGCTCTTCTTTGGT	2		0	+	NM_009622	1010	TGTGAGCATCCTGTTTGCAGACATCGTGGGTTTCACAGGTCTGGCGTCCCAGTG	Adcy1
SRR029642.2559147	-	3	1	26	TTCGATGAGTTAGCCACGCTCGGTGCCAATGCCCTGCTCTTCTTTGGTGTGAAC	2		0	+	NM_009622	1010	TGTGAGCATCCTGTTTGCAGACATCGTGGGTTTCACAGGTCTGGCGTCCCAGTG	Adcy1
SRR029642.7621176	-	3	1	23	AAGTTCGATGAGTTAGCCACGCTCGGTGCCAATGCCCTGCTCTTCTTTGGTGTG	2		0	+	NM_009622	1010	TGTGAGCATCCTGTTTGCAGACATCGTGGGTTTCACAGGTCTGGCGTCCCAGTG	Adcy1
SRR029642.5303530	-	3	1	14	CTCTTTGGCAAGTTCGATGAGTTAGCCACGCTCGGTGCCAATGCCCTGCTCTTC	2		0	+	NM_009622	1010	TGTGAGCATCCTGTTTGCAGACATCGTGGGTTTCACAGGTCTGGCGTCCCAGTG	Adcy1
SRR029642.18994967	-	3	1	14	CTCTTTGGCAAGTTCGATGAGTTAGCCACGCTCGGTGCCAATGCCCTGCTCTTC	2		0	+	NM_009622	1003	ATGACAATGTGAGCATCCTGTTTGCAGACATCGTGGGTTTCACAGGTCTGGCGT	Adcy1
SRR029642.16781742	-	3	1	20	GGCAAGTTCGATGAGTTAGCCACGCTCGGTGCCAATGCCCTGCTCTTCTTTGGT	2		0	+	NM_009622	1002	CATGACAATGTGAGCATCCTGTTTGCAGACATCGTGGGTTTCACAGGTCTGGCG	Adcy1
SRR029642.15449781	-	4	1	34	ATACCATCACCTCGGTGCCAATGCCCTGCTCTTCTTGGGTGTGAACATGTATGG	2	17:T>G	0	+	NM_009622	1002	CATGACAATGTGAGCATCCTGTTTGCAGACATCGTGGGTTTCACAGGTCTGGCG	Adcy1
SRR029642.14470444	-	3	2	16	CTTTGGCAAGTTCGATGAGTTAGCCACGGAACGGTTGCTCATGAGCCTCTTGCC	2		0	+	NM_009622	1002	CATGACAATGTGAGCATCCTGTTTGCAGACATCGTGGGTTTCACAGGTCTGGCG	Adcy1
SRR029642.18994967	-	3	1	14	CTCTTTGGCAAGTTCGATGAGTTAGCCACGCTCGGTGCCAATGCCCTGCTCTTC	2		0	+	NM_009622	1002	CATGACAATGTGAGCATCCTGTTTGCAGACATCGTGGGTTTCACAGGTCTGGCG	Adcy1
SRR029642.7621176	-	3	1	23	AAGTTCGATGAGTTAGCCACGCTCGGTGCCAATGCCCTGCTCTTCTTTGGTGTG	2		0	+	NM_009622	1002	CATGACAATGTGAGCATCCTGTTTGCAGACATCGTGGGTTTCACAGGTCTGGCG	Adcy1
SRR029642.5303530	-	3	1	14	CTCTTTGGCAAGTTCGATGAGTTAGCCACGCTCGGTGCCAATGCCCTGCTCTTC	2		0	+	NM_009622	1002	CATGACAATGTGAGCATCCTGTTTGCAGACATCGTGGGTTTCACAGGTCTGGCG	Adcy1
SRR029642.2559147	-	3	1	26	TTCGATGAGTTAGCCACGCTCGGTGCCAATGCCCTGCTCTTCTTTGGTGTGAAC	2		0	+	NM_009622	1002	CATGACAATGTGAGCATCCTGTTTGCAGACATCGTGGGTTTCACAGGTCTGGCG	Adcy1
SRR029642.7758224	-	3	1	22	CAAGTTCGATGAGTTAGCCACGCTCGGTGCCAATGCCCTGCTCTTCTTTGGTGT	2		0	+	NM_009622	1002	CATGACAATGTGAGCATCCTGTTTGCAGACATCGTGGGTTTCACAGGTCTGGCG	Adcy1
SRR029642.16781742	-	3	1	20	GGCAAGTTCGATGAGTTAGCCACGCTCGGTGCCAATGCCCTGCTCTTCTTTGGT	2		0	+	NM_009622	1003	ATGACAATGTGAGCATCCTGTTTGCAGACATCGTGGGTTTCACAGGTCTGGCGT	Adcy1
SRR029642.14470444	-	3	2	16	CTTTGGCAAGTTCGATGAGTTAGCCACGGAACGGTTGCTCATGAGCCTCTTGCC	2		0	+	NM_009622	1003	ATGACAATGTGAGCATCCTGTTTGCAGACATCGTGGGTTTCACAGGTCTGGCGT	Adcy1
SRR029642.7758224	-	3	1	22	CAAGTTCGATGAGTTAGCCACGCTCGGTGCCAATGCCCTGCTCTTCTTTGGTGT	2		0	+	NM_009622	1003	ATGACAATGTGAGCATCCTGTTTGCAGACATCGTGGGTTTCACAGGTCTGGCGT	Adcy1
SRR029642.7621176	-	3	1	23	AAGTTCGATGAGTTAGCCACGCTCGGTGCCAATGCCCTGCTCTTCTTTGGTGTG	2		0	+	NM_009622	1003	ATGACAATGTGAGCATCCTGTTTGCAGACATCGTGGGTTTCACAGGTCTGGCGT	Adcy1
SRR029642.15449781	-	4	1	34	ATACCATCACCTCGGTGCCAATGCCCTGCTCTTCTTGGGTGTGAACATGTATGG	2	17:T>G	0	+	NM_009622	1003	ATGACAATGTGAGCATCCTGTTTGCAGACATCGTGGGTTTCACAGGTCTGGCGT	Adcy1
SRR029642.5303530	-	3	1	14	CTCTTTGGCAAGTTCGATGAGTTAGCCACGCTCGGTGCCAATGCCCTGCTCTTC	2		0	+	NM_009622	1003	ATGACAATGTGAGCATCCTGTTTGCAGACATCGTGGGTTTCACAGGTCTGGCGT	Adcy1
SRR029642.2559147	-	3	1	26	TTCGATGAGTTAGCCACGCTCGGTGCCAATGCCCTGCTCTTCTTTGGTGTGAAC	2		0	+	NM_009622	1003	ATGACAATGTGAGCATCCTGTTTGCAGACATCGTGGGTTTCACAGGTCTGGCGT	Adcy1
SRR029642.1095128	-	3	1	34	ACGGCAGCAGGAGGTAGAAGACCATGTTGCATTTTTAATAACCGTTCCCACTGC	2	26:G>T	0	+	NM_153534	868	CGGGAGCTTACCATAAGCACCTCATGGAACTTGCCCTGCAGCAAACCTATCGGG	Adcy2
SRR029642.6141612	-	18	17	30	CCAGATGAAGATTGGCCACAGAAGAGAAGGAGGAGAGGGAGGAGCTGCAGGCCT	2	17:T>G	0	+	NM_001012765	3890	AGGCAGGCAAGACCCACATCAAGGCTATTGCAGACTTCGCTATGAAGCTGATGG	Adcy5
SRR029642.13531650	+	12	7	33	ATGGACAACAGACTCTGGCTGCCCTAACAAGAAATTCAATAAATCTGCTTCCAA	2		0	-	NM_009623	3174	CCTGAGGAAATTAACAAGAGAATAGAGCATACCATCGACTTGCGGAGTGGCGAT	Adcy8
SRR029642.20715840	+	2	1	13	GACATGATGGGCCTAAATGAGTCTTCCCCAGCGCTGCATGCACAGTGGAGGGTG	2	3:C>A	0	-	NM_001025372	441	AGCCAGAGACAGTGGCTGGGAAGCACCATGGCCAGAACCCTGCAGCTCTCCCTG	Adcyap1r1
SRR029642.6696837	+	4	2	14	TTGCTGATAGTAATTCCTTGGAGATCACAGGCTATTGCTATGCACTCTGACTGC	2		0	-	NM_001025372	441	AGCCAGAGACAGTGGCTGGGAAGCACCATGGCCAGAACCCTGCAGCTCTCCCTG	Adcyap1r1
SRR029642.12465222	-	8	5	29	CTCGTTAGCACTGGGCCATACATAGAAGAAATCTGTGAAAGCCTTCGTGGGGAT	2		0	+	NM_177078	671	ACCGGTAAAATGTATGCCATGAAGTGCTTAGACAAGAAAAGGGTGAAGATGAAG	Adrbk2
SRR029642.16080172	-	18	18	22	GCTGCTCACCTTCATGGAGCAGCTTTCAATGACTTTAGCTACCTGCACACAAAC	2		0	+	NM_009636	2860	TGTCTGGAGCTCTCCGTATACCTGGGCTGTGACAAGTTCCCCCACGAGAGTGAG	Aebp1
SRR029642.15682238	-	2	1	3	CACCCCAGATGCCTCTGCCGGAGATCCCTCAGCCATGGCTGCAATGGAAGAGTT	2		1	+	NM_027373	323	ATCTTGCTGCGCCTGCAGTCATCCAAGGGCTTTGAAGTGAAGGACCATGCTCAG	Afap1
SRR029642.17451176	+	2	2	33	AAACAAGTGAAACAAACAAAGGGGATGCCCTTGCCAACCGAGTCCAGAACACTC	2		0	-	NM_008032	722	CATTCCAGTCAGAATCATCTGGTGGGCATTCCAAAGAATTCTGCACCCCAAACT	Aff2
SRR029642.8669612	+	2	2	30	TGCAAACAAGTGAAACAAACAAAGGGGATGCCCTTGCCAACCGAGTCCAGAACA	2		0	-	NM_008032	722	CATTCCAGTCAGAATCATCTGGTGGGCATTCCAAAGAATTCTGCACCCCAAACT	Aff2
SRR029642.4091671	+	2	2	30	TGCAAACAAGTGAAACAAACAAAGGGGATGCCCTTGCCAACCGAGTCCAGAACA	2		0	-	NM_008032	722	CATTCCAGTCAGAATCATCTGGTGGGCATTCCAAAGAATTCTGCACCCCAAACT	Aff2
SRR029642.3866801	+	2	2	25	AATCCTGCAAACAAGTGAAACAAACAAAGGGGATGCCCTTGCCAACCGAGTCCA	2		0	-	NM_008032	722	CATTCCAGTCAGAATCATCTGGTGGGCATTCCAAAGAATTCTGCACCCCAAACT	Aff2
SRR029642.8669612	+	2	2	30	TGCAAACAAGTGAAACAAACAAAGGGGATGCCCTTGCCAACCGAGTCCAGAACA	2		0	-	NM_008032	737	CATCTGGTGGGCATTCCAAAGAATTCTGCACCCCAAACTCCCATCAGCAAAAGT	Aff2
SRR029642.17451176	+	2	2	33	AAACAAGTGAAACAAACAAAGGGGATGCCCTTGCCAACCGAGTCCAGAACACTC	2		0	-	NM_008032	737	CATCTGGTGGGCATTCCAAAGAATTCTGCACCCCAAACTCCCATCAGCAAAAGT	Aff2
SRR029642.3866801	+	2	2	25	AATCCTGCAAACAAGTGAAACAAACAAAGGGGATGCCCTTGCCAACCGAGTCCA	2		0	-	NM_008032	737	CATCTGGTGGGCATTCCAAAGAATTCTGCACCCCAAACTCCCATCAGCAAAAGT	Aff2
SRR029642.4091671	+	2	2	30	TGCAAACAAGTGAAACAAACAAAGGGGATGCCCTTGCCAACCGAGTCCAGAACA	2		0	-	NM_008032	737	CATCTGGTGGGCATTCCAAAGAATTCTGCACCCCAAACTCCCATCAGCAAAAGT	Aff2
SRR029642.3866801	+	2	2	25	AATCCTGCAAACAAGTGAAACAAACAAAGGGGATGCCCTTGCCAACCGAGTCCA	2		0	-	NM_008032	731	CAGAATCATCTGGTGGGCATTCCAAAGAATTCTGCACCCCAAACTCCCATCAGC	Aff2
SRR029642.4091671	+	2	2	30	TGCAAACAAGTGAAACAAACAAAGGGGATGCCCTTGCCAACCGAGTCCAGAACA	2		0	-	NM_008032	731	CAGAATCATCTGGTGGGCATTCCAAAGAATTCTGCACCCCAAACTCCCATCAGC	Aff2
SRR029642.8669612	+	2	2	30	TGCAAACAAGTGAAACAAACAAAGGGGATGCCCTTGCCAACCGAGTCCAGAACA	2		0	-	NM_008032	731	CAGAATCATCTGGTGGGCATTCCAAAGAATTCTGCACCCCAAACTCCCATCAGC	Aff2
SRR029642.17451176	+	2	2	33	AAACAAGTGAAACAAACAAAGGGGATGCCCTTGCCAACCGAGTCCAGAACACTC	2		0	-	NM_008032	731	CAGAATCATCTGGTGGGCATTCCAAAGAATTCTGCACCCCAAACTCCCATCAGC	Aff2
SRR029642.17451176	+	2	2	33	AAACAAGTGAAACAAACAAAGGGGATGCCCTTGCCAACCGAGTCCAGAACACTC	2		0	-	NM_008032	731	CAGAATCATCTGGTGGGCATTCCAAAGAATTCTGCACCCCAAACTCCCATCAGC	Aff2
SRR029642.8669612	+	2	2	30	TGCAAACAAGTGAAACAAACAAAGGGGATGCCCTTGCCAACCGAGTCCAGAACA	2		0	-	NM_008032	731	CAGAATCATCTGGTGGGCATTCCAAAGAATTCTGCACCCCAAACTCCCATCAGC	Aff2
SRR029642.4091671	+	2	2	30	TGCAAACAAGTGAAACAAACAAAGGGGATGCCCTTGCCAACCGAGTCCAGAACA	2		0	-	NM_008032	731	CAGAATCATCTGGTGGGCATTCCAAAGAATTCTGCACCCCAAACTCCCATCAGC	Aff2
SRR029642.3866801	+	2	2	25	AATCCTGCAAACAAGTGAAACAAACAAAGGGGATGCCCTTGCCAACCGAGTCCA	2		0	-	NM_008032	731	CAGAATCATCTGGTGGGCATTCCAAAGAATTCTGCACCCCAAACTCCCATCAGC	Aff2
SRR029642.17465280	-	1	1	30	GCTCTTCAGTTCAGGCATAAACTAACTACTGGAAAGCTGCGGAATAATGGAGCC	2	51:A>T	0	+	NM_181411	1987	CATCATCTAAAGGAAGTCTGGCAGTCACAGAGGACAGATGAAACTATGGGCACT	Aftph
SRR029642.10204962	+	5	2	20	ACGTGTACATCTGATCCATTCCAGACAGCTTTACTCAACCGGTTGGAGAGAATT	2		1	-	NM_181411	2202	GGAAGAGGAGTTTTCTTCCCTGAAGCACTTGCTGGAGACACACAGCTCGCCAGC	Aftph
SRR029642.899673	-	1	1	3	TTGCTAGTGGCCATTTGCAGGAACCAGGCACTTCAGTTCAGGCATAAACTAACT	2		0	+	NM_181411	1987	CATCATCTAAAGGAAGTCTGGCAGTCACAGAGGACAGATGAAACTATGGGCACT	Aftph
SRR029642.10204962	+	5	2	20	ACGTGTACATCTGATCCATTCCAGACAGCTTTACTCAACCGGTTGGAGAGAATT	2		1	-	NM_181411	2371	AAGAAGCTTTTGTGCTCCTGGGGAATAGACACTCGAAACATTCTATTCACTGGC	Aftph
SRR029642.9070195	+	5	3	26	ACATCTGATCCATTCCAGTGAGNTGAGGGGTGTATGGACCGAACTGCAGGACAT	2	22:T>N	1	-	NM_181411	2202	GGAAGAGGAGTTTTCTTCCCTGAAGCACTTGCTGGAGACACACAGCTCGCCAGC	Aftph
SRR029642.9070195	+	5	3	26	ACATCTGATCCATTCCAGTGAGNTGAGGGGTGTATGGACCGAACTGCAGGACAT	2	22:T>N	1	-	NM_181411	2371	AAGAAGCTTTTGTGCTCCTGGGGAATAGACACTCGAAACATTCTATTCACTGGC	Aftph
SRR029642.899673	-	1	1	3	TTGCTAGTGGCCATTTGCAGGAACCAGGCACTTCAGTTCAGGCATAAACTAACT	2		0	+	NM_181411	2028	AACTATGGGCACTCTGGGAACCCCTAAGATGCACAGTGTTTCTTCAGCAGCTTC	Aftph
SRR029642.17465280	-	1	1	30	GCTCTTCAGTTCAGGCATAAACTAACTACTGGAAAGCTGCGGAATAATGGAGCC	2	51:A>T	0	+	NM_181411	2028	AACTATGGGCACTCTGGGAACCCCTAAGATGCACAGTGTTTCTTCAGCAGCTTC	Aftph
SRR029642.16997579	-	5	3	21	CGTGGAGCGGGTCTTCCAGGACGGTGGCAGGTTCAAGAAGGAGATTGTTGTTGA	2		0	+	NM_178119	1188	CGATGACGTCAGGGCTCGGAAGCTCTCCAATGACCTGAAGAGGTGCACGTACTA	Agap1
SRR029642.19383575	-	8	6	29	ATCCCAATTAAACAGTTGCCCAGAAGATCGTTGCCACAAGGAAGAAGCAGCAGC	2		0	+	NM_001037136	1564	AACCTATTCACATCTAGGAAAGGGAGCGACCCAGACAAAGAGAAGAAAGGCCTG	Agap1
SRR029642.191053	-	12	8	15	CAACCCGAAACACCCAACTTGACCTGATGACATATTACAGACGCCACACTTGCC	2		0	+	NM_023538	899	AGGCTTGCCTCATTCTGGGCACAGCCACAGGATGCCTCCTCCCGAGAGGTAAGC	Agk
SRR029642.3267371	+	16	9	10	AACTGTGAGAAGTCCAACAGTCAGTTTAATTATGAGACAAACGCCAGGAGAGCG	2		1	-	NM_001048008	889	GTAGATTGGCACCGTCATGATAATCGGCATAGAAACATGCTCATTCGGAAGGGG	Agtpbp1
SRR029642.3267371	+	16	9	10	AACTGTGAGAAGTCCAACAGTCAGTTTAATTATGAGACAAACGCCAGGAGAGCG	2		0	-	NM_001048008	632	AGCACTTTCAGAACTACCGCTTGGTTCTTCCTTGTCTTCAGCTCTTGCGAGTCT	Agtpbp1
SRR029642.3267371	+	16	9	10	AACTGTGAGAAGTCCAACAGTCAGTTTAATTATGAGACAAACGCCAGGAGAGCG	2		2	-	NM_001048008	635	ACTTTCGGAACTCCCGCTTGGTTCTTCCTTGTCTTCAGCTCTTGCGAGTCTATT	Agtpbp1
SRR029642.13083789	+	11	1	5	GTTTGTAACATGGGCCATTCCAACACCGAGATTGATGTGATTCAGTTTGCTGAC	2		0	-	NM_001171001	255	TTCCATCTCTCAGTCATCTACTGACAGCTATAGCTCAGCTGCCTCATATACAGA	Ahcyl2
SRR029642.11674521	-	4	2	25	ATGAAAAACGACACCATCGCTTCAGTAGCCGTACATTCCCCACAAAAAAGCACT	2	40:T>C,49:G>A	0	+	NM_019921	1006	TGTCAGAAAAACTAATGAAAAGTATAGAACAAGATGCAGTGAATACTTTTACCA	Akap10
SRR029642.50242	+	6	5	22	GGAGGGGACGGGGAGCCCCAAGAGCTTTAAGTTGAACGTAGACAGTCACTGTGC	2		1	-	NM_198111	3528	TGACCGGGACACTTGTAATCTGAACGCAGATCACCAGCCCAGGCAGCTGATCAT	Akap6
SRR029642.19405749	-	12	12	1	GAGAATGTAATGCCCCCAAGCATGGAACTCATCTCATTGAAAGGAGACTCTGAA	2	53:T>G	0	+	NM_198111	6918	AAAAGGCAAGGCTGCACTGTATCCCAGCCCCCAAACTTTAACCTGCAAAGAGAA	Akap6
SRR029642.9816606	+	12	12	2	AGAATGTAATGCCCCCAAGCATGGAACTCATCTCATTGAAAGGAGACTCTGAAT	2		1	-	NM_198111	3528	TGACCGGGACACTTGTAATCTGAACGCAGATCACCAGCCCAGGCAGCTGATCAT	Akap6
SRR029642.9312192	-	12	12	1	TAGAATGTAATGCCCCCAAGCATGGAACTCATCTCATGGAAAGGAGACTCTGAA	2	16:T>G	0	+	NM_198111	6918	AAAAGGCAAGGCTGCACTGTATCCCAGCCCCCAAACTTTAACCTGCAAAGAGAA	Akap6
SRR029642.13568958	+	11	11	24	AGAAGATGGGAAAAGAATCTTCGCTCTGTCATGAGATCAAGCAGCGGCGTAGAG	2		0	-	NM_198111	2630	TCATTGCGTCTCACAAAGCAGGACTGAAGGACATGCTGAAGATGATTGCAAGTC	Akap6
SRR029642.14241595	+	12	12	9	AATGCCCCCAAGCATGGAACTCATCTCATTGAAAGGAGACTCTGAATGTGATTG	2		0	-	NM_198111	2630	TCATTGCGTCTCACAAAGCAGGACTGAAGGACATGCTGAAGATGATTGCAAGTC	Akap6
SRR029642.50242	+	6	5	22	GGAGGGGACGGGGAGCCCCAAGAGCTTTAAGTTGAACGTAGACAGTCACTGTGC	2		0	-	NM_198111	2630	TCATTGCGTCTCACAAAGCAGGACTGAAGGACATGCTGAAGATGATTGCAAGTC	Akap6
SRR029642.9816606	+	12	12	2	AGAATGTAATGCCCCCAAGCATGGAACTCATCTCATTGAAAGGAGACTCTGAAT	2		0	-	NM_198111	2630	TCATTGCGTCTCACAAAGCAGGACTGAAGGACATGCTGAAGATGATTGCAAGTC	Akap6
SRR029642.19405749	-	12	12	1	GAGAATGTAATGCCCCCAAGCATGGAACTCATCTCATTGAAAGGAGACTCTGAA	2	53:T>G	0	+	NM_198111	6918	AAAAGGCAAGGCTGCACTGTATCCCAGCCCCCAAACTTTAACCTGCAAAGAGAA	Akap6
SRR029642.14241595	+	12	12	9	AATGCCCCCAAGCATGGAACTCATCTCATTGAAAGGAGACTCTGAATGTGATTG	2		1	-	NM_198111	3528	TGACCGGGACACTTGTAATCTGAACGCAGATCACCAGCCCAGGCAGCTGATCAT	Akap6
SRR029642.50242	+	6	5	22	GGAGGGGACGGGGAGCCCCAAGAGCTTTAAGTTGAACGTAGACAGTCACTGTGC	2		0	-	NM_198111	3744	GACAGACATAAGTAACAAACTCATTAGTGTGCATGAAGAATCCAACGACCTTGA	Akap6
SRR029642.9816606	+	12	12	2	AGAATGTAATGCCCCCAAGCATGGAACTCATCTCATTGAAAGGAGACTCTGAAT	2		0	-	NM_198111	3744	GACAGACATAAGTAACAAACTCATTAGTGTGCATGAAGAATCCAACGACCTTGA	Akap6
SRR029642.13568958	+	11	11	24	AGAAGATGGGAAAAGAATCTTCGCTCTGTCATGAGATCAAGCAGCGGCGTAGAG	2		0	-	NM_198111	3744	GACAGACATAAGTAACAAACTCATTAGTGTGCATGAAGAATCCAACGACCTTGA	Akap6
SRR029642.14241595	+	12	12	9	AATGCCCCCAAGCATGGAACTCATCTCATTGAAAGGAGACTCTGAATGTGATTG	2		0	-	NM_198111	3744	GACAGACATAAGTAACAAACTCATTAGTGTGCATGAAGAATCCAACGACCTTGA	Akap6
SRR029642.14241595	+	12	12	9	AATGCCCCCAAGCATGGAACTCATCTCATTGAAAGGAGACTCTGAATGTGATTG	2		1	-	NM_198111	3719	GGGAGGATGCCCTGGAATGGGATGAGACAGACATAAGTAACAAACTCATTAGTG	Akap6
SRR029642.9312192	-	12	12	1	TAGAATGTAATGCCCCCAAGCATGGAACTCATCTCATGGAAAGGAGACTCTGAA	2	16:T>G	0	+	NM_198111	6918	AAAAGGCAAGGCTGCACTGTATCCCAGCCCCCAAACTTTAACCTGCAAAGAGAA	Akap6
SRR029642.9816606	+	12	12	2	AGAATGTAATGCCCCCAAGCATGGAACTCATCTCATTGAAAGGAGACTCTGAAT	2		1	-	NM_198111	3719	GGGAGGATGCCCTGGAATGGGATGAGACAGACATAAGTAACAAACTCATTAGTG	Akap6
SRR029642.13568958	+	11	11	24	AGAAGATGGGAAAAGAATCTTCGCTCTGTCATGAGATCAAGCAGCGGCGTAGAG	2		1	-	NM_198111	3528	TGACCGGGACACTTGTAATCTGAACGCAGATCACCAGCCCAGGCAGCTGATCAT	Akap6
SRR029642.13568958	+	11	11	24	AGAAGATGGGAAAAGAATCTTCGCTCTGTCATGAGATCAAGCAGCGGCGTAGAG	2		1	-	NM_198111	3719	GGGAGGATGCCCTGGAATGGGATGAGACAGACATAAGTAACAAACTCATTAGTG	Akap6
SRR029642.50242	+	6	5	22	GGAGGGGACGGGGAGCCCCAAGAGCTTTAAGTTGAACGTAGACAGTCACTGTGC	2		1	-	NM_198111	3719	GGGAGGATGCCCTGGAATGGGATGAGACAGACATAAGTAACAAACTCATTAGTG	Akap6
SRR029642.1702370	+	10	7	27	ATGTATATGACAAAAAGCTGTTTTTCCATTTGTCGAGAGAGCGAGTGTTCTCTG	2		0	-	NM_011785	820	TTGGACTATCTACATTCTGGAAAGATTGTGTACCGTGATCTCAAGTTGGAGAAT	Akt3
SRR029642.2750102	-	15	14	33	GCTCGGCCCAGGTAACAGGATTGAGAGGCCCTGTGCTCCGGCTTCGANAACCAT	2	6:G>N	1	+	NM_145954	2186	AGCTCCTCTGTTTCCTGCTGGCCTGGTGAGTGTAGTGACAGGGGATCGCGACCC	Aldh16a1
SRR029642.7097852	+	4	1	1	CCGTGGTGCCCTCCCCAAGCTGGCCATCTGTGCTGCTCTTCAGACATAGAGATT	2	46:C>T	1	-	NM_145939	258	ATGGCACATATGACTACACACAGCTGCAGGGTGACACCGGACCTCTTGTCTACT	Alg3
SRR029642.3401509	+	13	10	26	AGAATTATGCAGTGTTTGCTTTTGCTTTACACTTTTGAGCTTGCTTCCTGCATG	2		2	-	NM_001081264	1175	ATTTACTCTGCTTAGCTGTGCGCTATCATTCTTTCTGTTTTCTTTCAAAGTACA	Alg6
SRR029642.17049412	-	13	1	0	GAGTGGGTCAGCCTGGCTCACAGACCATTCCTGGATGCGTCTAGGTCTGGAAAT	2		0	+	NM_133981	1622	AGCCTTCCAGATACATTGACATCAGCAAATGCCATTACTTAGTGGATTTGGATA	Alg9
SRR029642.19014008	+	12	1	10	GAACGACCAGAACCGAGAGGAGCCTTCCAGATACGTCTGGAAATAAAGCAGGGC	2		0	-	NM_133981	249	GCTCTCAGCGAGGTTGTGCGCAGCCCTTCTGAGCAACATCTCGGACTGTGATGA	Alg9
SRR029642.7218365	-	3	2	5	ACACATGGCATGCACACCTGGGCTTTCATGGCTGCAGAGCATCTCAAAGACAAG	2	34:T>G	0	+	NM_011787	691	TCCCACCACTCCAATGAGCAGCCATGGGAGAGTCCTGTCCCTGCTGATTGCTAT	Amfr
SRR029642.18987938	+	16	8	5	CTTGGGCTAGAGATGGAGGAGCCAAAGGAGGAGGCTGTGGTTTGCCACAAGCTC	2	39:C>G	0	-	NM_175007	787	CTTCAGCATTCAAGGAGCTCCCAGTGACTCGGGTCCTCTTCGCATTGCAAAGAC	Amph
SRR029642.15621182	+	14	13	31	ACGAACTTCTCCATGGCTCTGGGTCTTTACTGTATCATTTGAGTGAACTTAAAG	2	21:A>G	0	-	NM_024213	1263	CTAGGACTGGATGCTGCAGGCATTGAAGATGCTATTACTGCTGTGGGTTCTTTC	Anapc4
SRR029642.17007435	+	14	13	18	ATCCTCAAAGCAAACGAACTTCTCCATGGCTCTGAGTCTTTACTGTATCATTTG	2		0	-	NM_024213	1263	CTAGGACTGGATGCTGCAGGCATTGAAGATGCTATTACTGCTGTGGGTTCTTTC	Anapc4
SRR029642.8243077	+	14	13	24	AAAGCAAACGAACTTCTCCATGGCTCTGAGTCTTTACTGTATCATTTGAGTGAA	2		0	-	NM_024213	1261	CTCTAGGACTGGATGCTGCAGGCATTGAAGATGCTATTACTGCTGTGGGTTCTT	Anapc4
SRR029642.18549189	+	14	13	18	ATCCTCAAAGCAAACGAACTTCTCCATGGCTCTGAGTCTTTACTGTATCATTTG	2		0	-	NM_024213	1263	CTAGGACTGGATGCTGCAGGCATTGAAGATGCTATTACTGCTGTGGGTTCTTTC	Anapc4
SRR029642.11610959	+	14	13	16	TCATCCTCAAAGCAAACGAACTTCTCCATGGCTCTGAGTCTTTACTGTATCATT	2		0	-	NM_024213	1263	CTAGGACTGGATGCTGCAGGCATTGAAGATGCTATTACTGCTGTGGGTTCTTTC	Anapc4
SRR029642.8243077	+	14	13	24	AAAGCAAACGAACTTCTCCATGGCTCTGAGTCTTTACTGTATCATTTGAGTGAA	2		0	-	NM_024213	1263	CTAGGACTGGATGCTGCAGGCATTGAAGATGCTATTACTGCTGTGGGTTCTTTC	Anapc4
SRR029642.17007435	+	14	13	18	ATCCTCAAAGCAAACGAACTTCTCCATGGCTCTGAGTCTTTACTGTATCATTTG	2		0	-	NM_024213	1263	CTAGGACTGGATGCTGCAGGCATTGAAGATGCTATTACTGCTGTGGGTTCTTTC	Anapc4
SRR029642.18549189	+	14	13	18	ATCCTCAAAGCAAACGAACTTCTCCATGGCTCTGAGTCTTTACTGTATCATTTG	2		0	-	NM_024213	1263	CTAGGACTGGATGCTGCAGGCATTGAAGATGCTATTACTGCTGTGGGTTCTTTC	Anapc4
SRR029642.17007435	+	14	13	18	ATCCTCAAAGCAAACGAACTTCTCCATGGCTCTGAGTCTTTACTGTATCATTTG	2		0	-	NM_024213	1276	CTGCAGGCATTGAAGATGCTATTACTGCTGTGGGTTCTTTCATCCTCAAAGCAA	Anapc4
SRR029642.18549189	+	14	13	18	ATCCTCAAAGCAAACGAACTTCTCCATGGCTCTGAGTCTTTACTGTATCATTTG	2		0	-	NM_024213	1276	CTGCAGGCATTGAAGATGCTATTACTGCTGTGGGTTCTTTCATCCTCAAAGCAA	Anapc4
SRR029642.8243077	+	14	13	24	AAAGCAAACGAACTTCTCCATGGCTCTGAGTCTTTACTGTATCATTTGAGTGAA	2		0	-	NM_024213	1276	CTGCAGGCATTGAAGATGCTATTACTGCTGTGGGTTCTTTCATCCTCAAAGCAA	Anapc4
SRR029642.11610959	+	14	13	16	TCATCCTCAAAGCAAACGAACTTCTCCATGGCTCTGAGTCTTTACTGTATCATT	2		0	-	NM_024213	1276	CTGCAGGCATTGAAGATGCTATTACTGCTGTGGGTTCTTTCATCCTCAAAGCAA	Anapc4
SRR029642.15621182	+	14	13	31	ACGAACTTCTCCATGGCTCTGGGTCTTTACTGTATCATTTGAGTGAACTTAAAG	2	21:A>G	0	-	NM_024213	1276	CTGCAGGCATTGAAGATGCTATTACTGCTGTGGGTTCTTTCATCCTCAAAGCAA	Anapc4
SRR029642.15621182	+	14	13	31	ACGAACTTCTCCATGGCTCTGGGTCTTTACTGTATCATTTGAGTGAACTTAAAG	2	21:A>G	0	-	NM_024213	1269	CTGGATGCTGCAGGCATTGAAGATGCTATTACTGCTGTGGGTTCTTTCATCCTC	Anapc4
SRR029642.17007435	+	14	13	18	ATCCTCAAAGCAAACGAACTTCTCCATGGCTCTGAGTCTTTACTGTATCATTTG	2		0	-	NM_024213	1269	CTGGATGCTGCAGGCATTGAAGATGCTATTACTGCTGTGGGTTCTTTCATCCTC	Anapc4
SRR029642.18549189	+	14	13	18	ATCCTCAAAGCAAACGAACTTCTCCATGGCTCTGAGTCTTTACTGTATCATTTG	2		0	-	NM_024213	1269	CTGGATGCTGCAGGCATTGAAGATGCTATTACTGCTGTGGGTTCTTTCATCCTC	Anapc4
SRR029642.11610959	+	14	13	16	TCATCCTCAAAGCAAACGAACTTCTCCATGGCTCTGAGTCTTTACTGTATCATT	2		0	-	NM_024213	1269	CTGGATGCTGCAGGCATTGAAGATGCTATTACTGCTGTGGGTTCTTTCATCCTC	Anapc4
SRR029642.8243077	+	14	13	24	AAAGCAAACGAACTTCTCCATGGCTCTGAGTCTTTACTGTATCATTTGAGTGAA	2		0	-	NM_024213	1269	CTGGATGCTGCAGGCATTGAAGATGCTATTACTGCTGTGGGTTCTTTCATCCTC	Anapc4
SRR029642.18549189	+	14	13	18	ATCCTCAAAGCAAACGAACTTCTCCATGGCTCTGAGTCTTTACTGTATCATTTG	2		0	-	NM_024213	1261	CTCTAGGACTGGATGCTGCAGGCATTGAAGATGCTATTACTGCTGTGGGTTCTT	Anapc4
SRR029642.15621182	+	14	13	31	ACGAACTTCTCCATGGCTCTGGGTCTTTACTGTATCATTTGAGTGAACTTAAAG	2	21:A>G	0	-	NM_024213	1263	CTAGGACTGGATGCTGCAGGCATTGAAGATGCTATTACTGCTGTGGGTTCTTTC	Anapc4
SRR029642.11610959	+	14	13	16	TCATCCTCAAAGCAAACGAACTTCTCCATGGCTCTGAGTCTTTACTGTATCATT	2		0	-	NM_024213	1263	CTAGGACTGGATGCTGCAGGCATTGAAGATGCTATTACTGCTGTGGGTTCTTTC	Anapc4
SRR029642.11610959	+	14	13	16	TCATCCTCAAAGCAAACGAACTTCTCCATGGCTCTGAGTCTTTACTGTATCATT	2		0	-	NM_024213	1261	CTCTAGGACTGGATGCTGCAGGCATTGAAGATGCTATTACTGCTGTGGGTTCTT	Anapc4
SRR029642.17007435	+	14	13	18	ATCCTCAAAGCAAACGAACTTCTCCATGGCTCTGAGTCTTTACTGTATCATTTG	2		0	-	NM_024213	1261	CTCTAGGACTGGATGCTGCAGGCATTGAAGATGCTATTACTGCTGTGGGTTCTT	Anapc4
SRR029642.15621182	+	14	13	31	ACGAACTTCTCCATGGCTCTGGGTCTTTACTGTATCATTTGAGTGAACTTAAAG	2	21:A>G	0	-	NM_024213	1261	CTCTAGGACTGGATGCTGCAGGCATTGAAGATGCTATTACTGCTGTGGGTTCTT	Anapc4
SRR029642.8243077	+	14	13	24	AAAGCAAACGAACTTCTCCATGGCTCTGAGTCTTTACTGTATCATTTGAGTGAA	2		0	-	NM_024213	1263	CTAGGACTGGATGCTGCAGGCATTGAAGATGCTATTACTGCTGTGGGTTCTTTC	Anapc4
SRR029642.11268040	-	7	1	31	GCTGTCGCTGACGGCCTTGAACCGGGGCATCGCTGCAGTCAAGGAGGATGCAGT	2		0	+	NM_020332	1219	CTGTCTACCCTGCTTTTGACAAGAATAACCCCAGCAATAAACTGGCGAACACAA	Ank
SRR029642.18365297	+	21	20	27	TGTCAGCATTTTGCAAGACTGGTCTTACACCCTTGATGGAAGCAGCTTCTGGAG	2	11:C>T	0	-	NM_175375	682	GCTGTGCCCTGGATGAAGCCGCTGCTGCACTGACACGGATGAGAGCAGAGAACA	Ankhd1
SRR029642.1566564	-	6	2	9	ATGAGATGCACACTGCCTTAATGGAAGCTTGCATGGAATTGGCAAATTGTCAAC	2		0	+	NM_175375	1248	AATGAGTTTAAAGAAAGTGCTCTGACACTTGCCTGCTACAAAGGCCATTTGGAT	Ankhd1
SRR029642.18365297	+	21	20	27	TGTCAGCATTTTGCAAGACTGGTCTTACACCCTTGATGGAAGCAGCTTCTGGAG	2	11:C>T	1	-	NM_175375	3997	CCCCTCCTGTGCCTTCCTCAAGAGACACTGCTTTAACCATAGCAGCAGACAAAG	Ankhd1
SRR029642.10249370	-	4	1	21	TGAAGCACTGCTTCGAGCTCACGAATGTGAAACATGTTGTAGAAGTACTCAAGA	2		1	+	NM_001003909	1244	TATGCTGCCTTAGACAAGAGAGAGCCATATGAAGGACTAAGGCCCCAGGATCTT	Ankib1
SRR029642.16661994	+	4	1	16	ACTGCTGAAGCACTGCTTCGAGCTCACGAATGTGAAACATGTTGTAGACGTACT	2	48:A>C	2	-	NM_001003909	589	AAAAAACATGAGAAATACAACCACCAAATTCCGCAAAGCACTCATCAATGGTGA	Ankib1
SRR029642.9109272	-	4	1	7	CCTCTTTTTACTGCTGAAGCACTGCTTCGAGCTCACGAATGTGAAACATGTTGT	2	48:G>T	1	+	NM_001003909	1244	TATGCTGCCTTAGACAAGAGAGAGCCATATGAAGGACTAAGGCCCCAGGATCTT	Ankib1
SRR029642.16661994	+	4	1	16	ACTGCTGAAGCACTGCTTCGAGCTCACGAATGTGAAACATGTTGTAGACGTACT	2	48:A>C	2	-	NM_001003909	580	CAGAAAAAAACAAAACAGGGGAAATACAACCACCAAATTCCGCAAAGCACTCAT	Ankib1
SRR029642.15787818	-	4	1	4	GCCCCTCTGTTTACTGCTGAAGCACTGCTTCGAGCTCACGAATGTGAAACATGT	2		0	+	NM_001003909	1252	CTTAGACAAGCGAGAGCCATATGAAGGACTAAGGCCCCAGGATCTTCGTAGGTT	Ankib1
SRR029642.17871878	-	4	1	17	CTGCTGAAGCACTGCTTCGAGCTCACGAATGTGAAACATGTTGTAGAAGTACTC	2		0	+	NM_001003909	1263	GAGAGCCATATGAAGGACTAAGGCCCCAGGATCTTCGTAGGTTAAAAGATATGC	Ankib1
SRR029642.14290764	-	4	1	11	TGTTTACTGCTGAAGCACTGCTTCGAGCTCACGAATGTGAAACATGTTGTAGAA	2		0	+	NM_001003909	1252	CTTAGACAAGCGAGAGCCATATGAAGGACTAAGGCCCCAGGATCTTCGTAGGTT	Ankib1
SRR029642.18620066	-	4	1	25	GCACTGCTTCGAGCTCACGAATGTGAAACATGTTGTAGAAGTACTCAAGAAGTG	2		0	+	NM_001003909	1263	GAGAGCCATATGAAGGACTAAGGCCCCAGGATCTTCGTAGGTTAAAAGATATGC	Ankib1
SRR029642.11218057	-	4	1	27	ACTGCTTCGAGCTCACGAATGTGAAACATGTTGTAGAAGGACCCAAGAAGTGGC	2	11:T>C,14:T>G	0	+	NM_001003909	1252	CTTAGACAAGCGAGAGCCATATGAAGGACTAAGGCCCCAGGATCTTCGTAGGTT	Ankib1
SRR029642.10249370	-	4	1	21	TGAAGCACTGCTTCGAGCTCACGAATGTGAAACATGTTGTAGAAGTACTCAAGA	2		0	+	NM_001003909	1263	GAGAGCCATATGAAGGACTAAGGCCCCAGGATCTTCGTAGGTTAAAAGATATGC	Ankib1
SRR029642.11209119	-	4	1	2	AGGCCCCTCTGTTTACTGCTGAAGCACTGCTTCGAGCTCACGAATGTGAAACAT	2		0	+	NM_001003909	1252	CTTAGACAAGCGAGAGCCATATGAAGGACTAAGGCCCCAGGATCTTCGTAGGTT	Ankib1
SRR029642.2689911	-	4	1	0	CCAGGCCCCTCTGTTTACTGCTGAAGCACNGCTTCGAGCTCACGAATGTGAAAC	2	24:T>N	0	+	NM_001003909	1259	AAGCGAGAGCCATATGAAGGACTAAGGCCCCAGGATCTTCGTAGGTTAAAAGAT	Ankib1
SRR029642.11131752	-	4	1	11	TGTTTACTGCTGAAGCACTGCTTCGAGCTCACGAATGTGAAACATGTTGTAGAA	2		0	+	NM_001003909	1252	CTTAGACAAGCGAGAGCCATATGAAGGACTAAGGCCCCAGGATCTTCGTAGGTT	Ankib1
SRR029642.14953047	+	4	1	13	TTTACTGCTGAAGCACTGCTTCGAGCTCACGAATGTGAAACATGTTGTAGAAGT	2		2	-	NM_001003909	589	AAAAAACATGAGAAATACAACCACCAAATTCCGCAAAGCACTCATCAATGGTGA	Ankib1
SRR029642.11122446	-	4	1	18	TGCTGAAGCACTGCTTCGAGCTCACGAATGTGAAACATGGTGTAGAAGTACTCA	2	14:T>G	0	+	NM_001003909	1252	CTTAGACAAGCGAGAGCCATATGAAGGACTAAGGCCCCAGGATCTTCGTAGGTT	Ankib1
SRR029642.4461030	-	4	1	7	CCTTTTTTTACTGCTGAAGCACTGCTTCGAGCTCACGAATGTGAAACATGTTGT	2	48:G>T,50:C>T	0	+	NM_001003909	1259	AAGCGAGAGCCATATGAAGGACTAAGGCCCCAGGATCTTCGTAGGTTAAAAGAT	Ankib1
SRR029642.10463795	-	4	1	0	CCAGGCCCCTCTGTTTACTGCTGAAGCACTGCTTCGAGCGCACGAATGTGAAAC	2	14:T>G	0	+	NM_001003909	1252	CTTAGACAAGCGAGAGCCATATGAAGGACTAAGGCCCCAGGATCTTCGTAGGTT	Ankib1
SRR029642.7005215	-	4	1	7	CCTCTGTTTACTGCTGAAGCACTGCTTCGAGCTCACGAATGTGAAACATGTTGT	2		0	+	NM_001003909	1259	AAGCGAGAGCCATATGAAGGACTAAGGCCCCAGGATCTTCGTAGGTTAAAAGAT	Ankib1
SRR029642.10249370	-	4	1	21	TGAAGCACTGCTTCGAGCTCACGAATGTGAAACATGTTGTAGAAGTACTCAAGA	2		0	+	NM_001003909	1252	CTTAGACAAGCGAGAGCCATATGAAGGACTAAGGCCCCAGGATCTTCGTAGGTT	Ankib1
SRR029642.10463795	-	4	1	0	CCAGGCCCCTCTGTTTACTGCTGAAGCACTGCTTCGAGCGCACGAATGTGAAAC	2	14:T>G	0	+	NM_001003909	1263	GAGAGCCATATGAAGGACTAAGGCCCCAGGATCTTCGTAGGTTAAAAGATATGC	Ankib1
SRR029642.9109272	-	4	1	7	CCTCTTTTTACTGCTGAAGCACTGCTTCGAGCTCACGAATGTGAAACATGTTGT	2	48:G>T	0	+	NM_001003909	1252	CTTAGACAAGCGAGAGCCATATGAAGGACTAAGGCCCCAGGATCTTCGTAGGTT	Ankib1
SRR029642.11122446	-	4	1	18	TGCTGAAGCACTGCTTCGAGCTCACGAATGTGAAACATGGTGTAGAAGTACTCA	2	14:T>G	0	+	NM_001003909	1263	GAGAGCCATATGAAGGACTAAGGCCCCAGGATCTTCGTAGGTTAAAAGATATGC	Ankib1
SRR029642.7718880	-	4	1	0	CCAGGCCCCGCTGTTTACGGCTGAAGCACTGCTTCGAGCTCACGAATGTGAAAC	2	35:T>G,44:T>G	0	+	NM_001003909	1252	CTTAGACAAGCGAGAGCCATATGAAGGACTAAGGCCCCAGGATCTTCGTAGGTT	Ankib1
SRR029642.4428347	-	4	1	28	CTGCTTCGAGCTCACGAATGTGAAACATGTTGTAGAAGTACTCAAGAAGTGGCT	2		0	+	NM_001003909	1259	AAGCGAGAGCCATATGAAGGACTAAGGCCCCAGGATCTTCGTAGGTTAAAAGAT	Ankib1
SRR029642.7005215	-	4	1	7	CCTCTGTTTACTGCTGAAGCACTGCTTCGAGCTCACGAATGTGAAACATGTTGT	2		0	+	NM_001003909	1252	CTTAGACAAGCGAGAGCCATATGAAGGACTAAGGCCCCAGGATCTTCGTAGGTT	Ankib1
SRR029642.11131752	-	4	1	11	TGTTTACTGCTGAAGCACTGCTTCGAGCTCACGAATGTGAAACATGTTGTAGAA	2		0	+	NM_001003909	1263	GAGAGCCATATGAAGGACTAAGGCCCCAGGATCTTCGTAGGTTAAAAGATATGC	Ankib1
SRR029642.4461030	-	4	1	7	CCTTTTTTTACTGCTGAAGCACTGCTTCGAGCTCACGAATGTGAAACATGTTGT	2	48:G>T,50:C>T	0	+	NM_001003909	1252	CTTAGACAAGCGAGAGCCATATGAAGGACTAAGGCCCCAGGATCTTCGTAGGTT	Ankib1
SRR029642.11209119	-	4	1	2	AGGCCCCTCTGTTTACTGCTGAAGCACTGCTTCGAGCTCACGAATGTGAAACAT	2		0	+	NM_001003909	1263	GAGAGCCATATGAAGGACTAAGGCCCCAGGATCTTCGTAGGTTAAAAGATATGC	Ankib1
SRR029642.4428347	-	4	1	28	CTGCTTCGAGCTCACGAATGTGAAACATGTTGTAGAAGTACTCAAGAAGTGGCT	2		0	+	NM_001003909	1252	CTTAGACAAGCGAGAGCCATATGAAGGACTAAGGCCCCAGGATCTTCGTAGGTT	Ankib1
SRR029642.16089589	-	4	1	9	TCTGTTTACTGCTGAAGCACTGCTTCGAGCTCACGAATGTGAAACATGTTGTAG	2		0	+	NM_001003909	1263	GAGAGCCATATGAAGGACTAAGGCCCCAGGATCTTCGTAGGTTAAAAGATATGC	Ankib1
SRR029642.2689911	-	4	1	0	CCAGGCCCCTCTGTTTACTGCTGAAGCACNGCTTCGAGCTCACGAATGTGAAAC	2	24:T>N	0	+	NM_001003909	1252	CTTAGACAAGCGAGAGCCATATGAAGGACTAAGGCCCCAGGATCTTCGTAGGTT	Ankib1
SRR029642.14290764	-	4	1	11	TGTTTACTGCTGAAGCACTGCTTCGAGCTCACGAATGTGAAACATGTTGTAGAA	2		0	+	NM_001003909	1263	GAGAGCCATATGAAGGACTAAGGCCCCAGGATCTTCGTAGGTTAAAAGATATGC	Ankib1
SRR029642.1657678	-	4	1	0	GCAGGCCCCTCTGTTTACTGCTGAAGCACTGCTTCGAGCTCACGAATGTGAAAC	2	53:C>G	0	+	NM_001003909	1252	CTTAGACAAGCGAGAGCCATATGAAGGACTAAGGCCCCAGGATCTTCGTAGGTT	Ankib1
SRR029642.15787818	-	4	1	4	GCCCCTCTGTTTACTGCTGAAGCACTGCTTCGAGCTCACGAATGTGAAACATGT	2		0	+	NM_001003909	1263	GAGAGCCATATGAAGGACTAAGGCCCCAGGATCTTCGTAGGTTAAAAGATATGC	Ankib1
SRR029642.1508513	-	4	1	7	CCTCTGTTTACTGCTGAAGCACTGCTTCGAGCTCACGAATGTGAAACATGTTGT	2		0	+	NM_001003909	1252	CTTAGACAAGCGAGAGCCATATGAAGGACTAAGGCCCCAGGATCTTCGTAGGTT	Ankib1
SRR029642.11218057	-	4	1	27	ACTGCTTCGAGCTCACGAATGTGAAACATGTTGTAGAAGGACCCAAGAAGTGGC	2	11:T>C,14:T>G	0	+	NM_001003909	1263	GAGAGCCATATGAAGGACTAAGGCCCCAGGATCTTCGTAGGTTAAAAGATATGC	Ankib1
SRR029642.7718880	-	4	1	0	CCAGGCCCCGCTGTTTACGGCTGAAGCACTGCTTCGAGCTCACGAATGTGAAAC	2	35:T>G,44:T>G	1	+	NM_001003909	1244	TATGCTGCCTTAGACAAGAGAGAGCCATATGAAGGACTAAGGCCCCAGGATCTT	Ankib1
SRR029642.1508513	-	4	1	7	CCTCTGTTTACTGCTGAAGCACTGCTTCGAGCTCACGAATGTGAAACATGTTGT	2		0	+	NM_001003909	1263	GAGAGCCATATGAAGGACTAAGGCCCCAGGATCTTCGTAGGTTAAAAGATATGC	Ankib1
SRR029642.7005215	-	4	1	7	CCTCTGTTTACTGCTGAAGCACTGCTTCGAGCTCACGAATGTGAAACATGTTGT	2		1	+	NM_001003909	1244	TATGCTGCCTTAGACAAGAGAGAGCCATATGAAGGACTAAGGCCCCAGGATCTT	Ankib1
SRR029642.7718880	-	4	1	0	CCAGGCCCCGCTGTTTACGGCTGAAGCACTGCTTCGAGCTCACGAATGTGAAAC	2	35:T>G,44:T>G	0	+	NM_001003909	1263	GAGAGCCATATGAAGGACTAAGGCCCCAGGATCTTCGTAGGTTAAAAGATATGC	Ankib1
SRR029642.18620066	-	4	1	25	GCACTGCTTCGAGCTCACGAATGTGAAACATGTTGTAGAAGTACTCAAGAAGTG	2		0	+	NM_001003909	1254	TAGACAAGCGAGAGCCATATGAAGGACTAAGGCCCCAGGATCTTCGTAGGTTAA	Ankib1
SRR029642.9109272	-	4	1	7	CCTCTTTTTACTGCTGAAGCACTGCTTCGAGCTCACGAATGTGAAACATGTTGT	2	48:G>T	0	+	NM_001003909	1263	GAGAGCCATATGAAGGACTAAGGCCCCAGGATCTTCGTAGGTTAAAAGATATGC	Ankib1
SRR029642.17871878	-	4	1	17	CTGCTGAAGCACTGCTTCGAGCTCACGAATGTGAAACATGTTGTAGAAGTACTC	2		0	+	NM_001003909	1254	TAGACAAGCGAGAGCCATATGAAGGACTAAGGCCCCAGGATCTTCGTAGGTTAA	Ankib1
SRR029642.7718880	-	4	1	0	CCAGGCCCCGCTGTTTACGGCTGAAGCACTGCTTCGAGCTCACGAATGTGAAAC	2	35:T>G,44:T>G	0	+	NM_001003909	1259	AAGCGAGAGCCATATGAAGGACTAAGGCCCCAGGATCTTCGTAGGTTAAAAGAT	Ankib1
SRR029642.16089589	-	4	1	9	TCTGTTTACTGCTGAAGCACTGCTTCGAGCTCACGAATGTGAAACATGTTGTAG	2		0	+	NM_001003909	1254	TAGACAAGCGAGAGCCATATGAAGGACTAAGGCCCCAGGATCTTCGTAGGTTAA	Ankib1
SRR029642.1657678	-	4	1	0	GCAGGCCCCTCTGTTTACTGCTGAAGCACTGCTTCGAGCTCACGAATGTGAAAC	2	53:C>G	0	+	NM_001003909	1263	GAGAGCCATATGAAGGACTAAGGCCCCAGGATCTTCGTAGGTTAAAAGATATGC	Ankib1
SRR029642.15787818	-	4	1	4	GCCCCTCTGTTTACTGCTGAAGCACTGCTTCGAGCTCACGAATGTGAAACATGT	2		0	+	NM_001003909	1254	TAGACAAGCGAGAGCCATATGAAGGACTAAGGCCCCAGGATCTTCGTAGGTTAA	Ankib1
SRR029642.2689911	-	4	1	0	CCAGGCCCCTCTGTTTACTGCTGAAGCACNGCTTCGAGCTCACGAATGTGAAAC	2	24:T>N	0	+	NM_001003909	1263	GAGAGCCATATGAAGGACTAAGGCCCCAGGATCTTCGTAGGTTAAAAGATATGC	Ankib1
SRR029642.14290764	-	4	1	11	TGTTTACTGCTGAAGCACTGCTTCGAGCTCACGAATGTGAAACATGTTGTAGAA	2		0	+	NM_001003909	1254	TAGACAAGCGAGAGCCATATGAAGGACTAAGGCCCCAGGATCTTCGTAGGTTAA	Ankib1
SRR029642.4428347	-	4	1	28	CTGCTTCGAGCTCACGAATGTGAAACATGTTGTAGAAGTACTCAAGAAGTGGCT	2		0	+	NM_001003909	1263	GAGAGCCATATGAAGGACTAAGGCCCCAGGATCTTCGTAGGTTAAAAGATATGC	Ankib1
SRR029642.11218057	-	4	1	27	ACTGCTTCGAGCTCACGAATGTGAAACATGTTGTAGAAGGACCCAAGAAGTGGC	2	11:T>C,14:T>G	0	+	NM_001003909	1254	TAGACAAGCGAGAGCCATATGAAGGACTAAGGCCCCAGGATCTTCGTAGGTTAA	Ankib1
SRR029642.7005215	-	4	1	7	CCTCTGTTTACTGCTGAAGCACTGCTTCGAGCTCACGAATGTGAAACATGTTGT	2		0	+	NM_001003909	1263	GAGAGCCATATGAAGGACTAAGGCCCCAGGATCTTCGTAGGTTAAAAGATATGC	Ankib1
SRR029642.11209119	-	4	1	2	AGGCCCCTCTGTTTACTGCTGAAGCACTGCTTCGAGCTCACGAATGTGAAACAT	2		0	+	NM_001003909	1254	TAGACAAGCGAGAGCCATATGAAGGACTAAGGCCCCAGGATCTTCGTAGGTTAA	Ankib1
SRR029642.4461030	-	4	1	7	CCTTTTTTTACTGCTGAAGCACTGCTTCGAGCTCACGAATGTGAAACATGTTGT	2	48:G>T,50:C>T	0	+	NM_001003909	1263	GAGAGCCATATGAAGGACTAAGGCCCCAGGATCTTCGTAGGTTAAAAGATATGC	Ankib1
SRR029642.11131752	-	4	1	11	TGTTTACTGCTGAAGCACTGCTTCGAGCTCACGAATGTGAAACATGTTGTAGAA	2		0	+	NM_001003909	1254	TAGACAAGCGAGAGCCATATGAAGGACTAAGGCCCCAGGATCTTCGTAGGTTAA	Ankib1
SRR029642.1657678	-	4	1	0	GCAGGCCCCTCTGTTTACTGCTGAAGCACTGCTTCGAGCTCACGAATGTGAAAC	2	53:C>G	0	+	NM_001003909	1259	AAGCGAGAGCCATATGAAGGACTAAGGCCCCAGGATCTTCGTAGGTTAAAAGAT	Ankib1
SRR029642.7718880	-	4	1	0	CCAGGCCCCGCTGTTTACGGCTGAAGCACTGCTTCGAGCTCACGAATGTGAAAC	2	35:T>G,44:T>G	0	+	NM_001003909	1255	AGACAAGCGAGAGCCATATGAAGGACTAAGGCCCCAGGATCTTCGTAGGTTAAA	Ankib1
SRR029642.1508513	-	4	1	7	CCTCTGTTTACTGCTGAAGCACTGCTTCGAGCTCACGAATGTGAAACATGTTGT	2		0	+	NM_001003909	1259	AAGCGAGAGCCATATGAAGGACTAAGGCCCCAGGATCTTCGTAGGTTAAAAGAT	Ankib1
SRR029642.4461030	-	4	1	7	CCTTTTTTTACTGCTGAAGCACTGCTTCGAGCTCACGAATGTGAAACATGTTGT	2	48:G>T,50:C>T	1	+	NM_001003909	1244	TATGCTGCCTTAGACAAGAGAGAGCCATATGAAGGACTAAGGCCCCAGGATCTT	Ankib1
SRR029642.11122446	-	4	1	18	TGCTGAAGCACTGCTTCGAGCTCACGAATGTGAAACATGGTGTAGAAGTACTCA	2	14:T>G	0	+	NM_001003909	1259	AAGCGAGAGCCATATGAAGGACTAAGGCCCCAGGATCTTCGTAGGTTAAAAGAT	Ankib1
SRR029642.11122446	-	4	1	18	TGCTGAAGCACTGCTTCGAGCTCACGAATGTGAAACATGGTGTAGAAGTACTCA	2	14:T>G	0	+	NM_001003909	1254	TAGACAAGCGAGAGCCATATGAAGGACTAAGGCCCCAGGATCTTCGTAGGTTAA	Ankib1
SRR029642.9109272	-	4	1	7	CCTCTTTTTACTGCTGAAGCACTGCTTCGAGCTCACGAATGTGAAACATGTTGT	2	48:G>T	0	+	NM_001003909	1259	AAGCGAGAGCCATATGAAGGACTAAGGCCCCAGGATCTTCGTAGGTTAAAAGAT	Ankib1
SRR029642.10463795	-	4	1	0	CCAGGCCCCTCTGTTTACTGCTGAAGCACTGCTTCGAGCGCACGAATGTGAAAC	2	14:T>G	0	+	NM_001003909	1254	TAGACAAGCGAGAGCCATATGAAGGACTAAGGCCCCAGGATCTTCGTAGGTTAA	Ankib1
SRR029642.11131752	-	4	1	11	TGTTTACTGCTGAAGCACTGCTTCGAGCTCACGAATGTGAAACATGTTGTAGAA	2		0	+	NM_001003909	1259	AAGCGAGAGCCATATGAAGGACTAAGGCCCCAGGATCTTCGTAGGTTAAAAGAT	Ankib1
SRR029642.10249370	-	4	1	21	TGAAGCACTGCTTCGAGCTCACGAATGTGAAACATGTTGTAGAAGTACTCAAGA	2		0	+	NM_001003909	1254	TAGACAAGCGAGAGCCATATGAAGGACTAAGGCCCCAGGATCTTCGTAGGTTAA	Ankib1
SRR029642.11209119	-	4	1	2	AGGCCCCTCTGTTTACTGCTGAAGCACTGCTTCGAGCTCACGAATGTGAAACAT	2		0	+	NM_001003909	1259	AAGCGAGAGCCATATGAAGGACTAAGGCCCCAGGATCTTCGTAGGTTAAAAGAT	Ankib1
SRR029642.9109272	-	4	1	7	CCTCTTTTTACTGCTGAAGCACTGCTTCGAGCTCACGAATGTGAAACATGTTGT	2	48:G>T	0	+	NM_001003909	1254	TAGACAAGCGAGAGCCATATGAAGGACTAAGGCCCCAGGATCTTCGTAGGTTAA	Ankib1
SRR029642.10249370	-	4	1	21	TGAAGCACTGCTTCGAGCTCACGAATGTGAAACATGTTGTAGAAGTACTCAAGA	2		0	+	NM_001003909	1273	TGAAGGACTAAGGCCCCAGGATCTTCGTAGGTTAAAAGATATGCTTATTGTGGA	Ankib1
SRR029642.4428347	-	4	1	28	CTGCTTCGAGCTCACGAATGTGAAACATGTTGTAGAAGTACTCAAGAAGTGGCT	2		1	+	NM_001003909	1244	TATGCTGCCTTAGACAAGAGAGAGCCATATGAAGGACTAAGGCCCCAGGATCTT	Ankib1
SRR029642.9109272	-	4	1	7	CCTCTTTTTACTGCTGAAGCACTGCTTCGAGCTCACGAATGTGAAACATGTTGT	2	48:G>T	0	+	NM_001003909	1273	TGAAGGACTAAGGCCCCAGGATCTTCGTAGGTTAAAAGATATGCTTATTGTGGA	Ankib1
SRR029642.7718880	-	4	1	0	CCAGGCCCCGCTGTTTACGGCTGAAGCACTGCTTCGAGCTCACGAATGTGAAAC	2	35:T>G,44:T>G	0	+	NM_001003909	1254	TAGACAAGCGAGAGCCATATGAAGGACTAAGGCCCCAGGATCTTCGTAGGTTAA	Ankib1
SRR029642.11218057	-	4	1	27	ACTGCTTCGAGCTCACGAATGTGAAACATGTTGTAGAAGGACCCAAGAAGTGGC	2	11:T>C,14:T>G	0	+	NM_001003909	1259	AAGCGAGAGCCATATGAAGGACTAAGGCCCCAGGATCTTCGTAGGTTAAAAGAT	Ankib1
SRR029642.7005215	-	4	1	7	CCTCTGTTTACTGCTGAAGCACTGCTTCGAGCTCACGAATGTGAAACATGTTGT	2		0	+	NM_001003909	1254	TAGACAAGCGAGAGCCATATGAAGGACTAAGGCCCCAGGATCTTCGTAGGTTAA	Ankib1
SRR029642.16089589	-	4	1	9	TCTGTTTACTGCTGAAGCACTGCTTCGAGCTCACGAATGTGAAACATGTTGTAG	2		0	+	NM_001003909	1273	TGAAGGACTAAGGCCCCAGGATCTTCGTAGGTTAAAAGATATGCTTATTGTGGA	Ankib1
SRR029642.4461030	-	4	1	7	CCTTTTTTTACTGCTGAAGCACTGCTTCGAGCTCACGAATGTGAAACATGTTGT	2	48:G>T,50:C>T	0	+	NM_001003909	1254	TAGACAAGCGAGAGCCATATGAAGGACTAAGGCCCCAGGATCTTCGTAGGTTAA	Ankib1
SRR029642.16089589	-	4	1	9	TCTGTTTACTGCTGAAGCACTGCTTCGAGCTCACGAATGTGAAACATGTTGTAG	2		0	+	NM_001003909	1259	AAGCGAGAGCCATATGAAGGACTAAGGCCCCAGGATCTTCGTAGGTTAAAAGAT	Ankib1
SRR029642.4428347	-	4	1	28	CTGCTTCGAGCTCACGAATGTGAAACATGTTGTAGAAGTACTCAAGAAGTGGCT	2		0	+	NM_001003909	1254	TAGACAAGCGAGAGCCATATGAAGGACTAAGGCCCCAGGATCTTCGTAGGTTAA	Ankib1
SRR029642.17871878	-	4	1	17	CTGCTGAAGCACTGCTTCGAGCTCACGAATGTGAAACATGTTGTAGAAGTACTC	2		0	+	NM_001003909	1273	TGAAGGACTAAGGCCCCAGGATCTTCGTAGGTTAAAAGATATGCTTATTGTGGA	Ankib1
SRR029642.11122446	-	4	1	18	TGCTGAAGCACTGCTTCGAGCTCACGAATGTGAAACATGGTGTAGAAGTACTCA	2	14:T>G	0	+	NM_001003909	1234	AGAAGCGGAGTATGCTGCCTTAGACAAGCGAGAGCCATATGAAGGACTAAGGCC	Ankib1
SRR029642.14290764	-	4	1	11	TGTTTACTGCTGAAGCACTGCTTCGAGCTCACGAATGTGAAACATGTTGTAGAA	2		0	+	NM_001003909	1273	TGAAGGACTAAGGCCCCAGGATCTTCGTAGGTTAAAAGATATGCTTATTGTGGA	Ankib1
SRR029642.11122446	-	4	1	18	TGCTGAAGCACTGCTTCGAGCTCACGAATGTGAAACATGGTGTAGAAGTACTCA	2	14:T>G	1	+	NM_001003909	1244	TATGCTGCCTTAGACAAGAGAGAGCCATATGAAGGACTAAGGCCCCAGGATCTT	Ankib1
SRR029642.18620066	-	4	1	25	GCACTGCTTCGAGCTCACGAATGTGAAACATGTTGTAGAAGTACTCAAGAAGTG	2		0	+	NM_001003909	1273	TGAAGGACTAAGGCCCCAGGATCTTCGTAGGTTAAAAGATATGCTTATTGTGGA	Ankib1
SRR029642.1657678	-	4	1	0	GCAGGCCCCTCTGTTTACTGCTGAAGCACTGCTTCGAGCTCACGAATGTGAAAC	2	53:C>G	1	+	NM_001003909	1244	TATGCTGCCTTAGACAAGAGAGAGCCATATGAAGGACTAAGGCCCCAGGATCTT	Ankib1
SRR029642.17871878	-	4	1	17	CTGCTGAAGCACTGCTTCGAGCTCACGAATGTGAAACATGTTGTAGAAGTACTC	2		0	+	NM_001003909	1259	AAGCGAGAGCCATATGAAGGACTAAGGCCCCAGGATCTTCGTAGGTTAAAAGAT	Ankib1
SRR029642.2689911	-	4	1	0	CCAGGCCCCTCTGTTTACTGCTGAAGCACNGCTTCGAGCTCACGAATGTGAAAC	2	24:T>N	0	+	NM_001003909	1254	TAGACAAGCGAGAGCCATATGAAGGACTAAGGCCCCAGGATCTTCGTAGGTTAA	Ankib1
SRR029642.15787818	-	4	1	4	GCCCCTCTGTTTACTGCTGAAGCACTGCTTCGAGCTCACGAATGTGAAACATGT	2		0	+	NM_001003909	1273	TGAAGGACTAAGGCCCCAGGATCTTCGTAGGTTAAAAGATATGCTTATTGTGGA	Ankib1
SRR029642.1657678	-	4	1	0	GCAGGCCCCTCTGTTTACTGCTGAAGCACTGCTTCGAGCTCACGAATGTGAAAC	2	53:C>G	0	+	NM_001003909	1254	TAGACAAGCGAGAGCCATATGAAGGACTAAGGCCCCAGGATCTTCGTAGGTTAA	Ankib1
SRR029642.18620066	-	4	1	25	GCACTGCTTCGAGCTCACGAATGTGAAACATGTTGTAGAAGTACTCAAGAAGTG	2		0	+	NM_001003909	1259	AAGCGAGAGCCATATGAAGGACTAAGGCCCCAGGATCTTCGTAGGTTAAAAGAT	Ankib1
SRR029642.1508513	-	4	1	7	CCTCTGTTTACTGCTGAAGCACTGCTTCGAGCTCACGAATGTGAAACATGTTGT	2		0	+	NM_001003909	1254	TAGACAAGCGAGAGCCATATGAAGGACTAAGGCCCCAGGATCTTCGTAGGTTAA	Ankib1
SRR029642.11209119	-	4	1	2	AGGCCCCTCTGTTTACTGCTGAAGCACTGCTTCGAGCTCACGAATGTGAAACAT	2		0	+	NM_001003909	1273	TGAAGGACTAAGGCCCCAGGATCTTCGTAGGTTAAAAGATATGCTTATTGTGGA	Ankib1
SRR029642.10463795	-	4	1	0	CCAGGCCCCTCTGTTTACTGCTGAAGCACTGCTTCGAGCGCACGAATGTGAAAC	2	14:T>G	1	+	NM_001003909	1244	TATGCTGCCTTAGACAAGAGAGAGCCATATGAAGGACTAAGGCCCCAGGATCTT	Ankib1
SRR029642.11131752	-	4	1	11	TGTTTACTGCTGAAGCACTGCTTCGAGCTCACGAATGTGAAACATGTTGTAGAA	2		0	+	NM_001003909	1273	TGAAGGACTAAGGCCCCAGGATCTTCGTAGGTTAAAAGATATGCTTATTGTGGA	Ankib1
SRR029642.2689911	-	4	1	0	CCAGGCCCCTCTGTTTACTGCTGAAGCACNGCTTCGAGCTCACGAATGTGAAAC	2	24:T>N	1	+	NM_001003909	1244	TATGCTGCCTTAGACAAGAGAGAGCCATATGAAGGACTAAGGCCCCAGGATCTT	Ankib1
SRR029642.11218057	-	4	1	27	ACTGCTTCGAGCTCACGAATGTGAAACATGTTGTAGAAGGACCCAAGAAGTGGC	2	11:T>C,14:T>G	0	+	NM_001003909	1273	TGAAGGACTAAGGCCCCAGGATCTTCGTAGGTTAAAAGATATGCTTATTGTGGA	Ankib1
SRR029642.1508513	-	4	1	7	CCTCTGTTTACTGCTGAAGCACTGCTTCGAGCTCACGAATGTGAAACATGTTGT	2		1	+	NM_001003909	1244	TATGCTGCCTTAGACAAGAGAGAGCCATATGAAGGACTAAGGCCCCAGGATCTT	Ankib1
SRR029642.11122446	-	4	1	18	TGCTGAAGCACTGCTTCGAGCTCACGAATGTGAAACATGGTGTAGAAGTACTCA	2	14:T>G	0	+	NM_001003909	1273	TGAAGGACTAAGGCCCCAGGATCTTCGTAGGTTAAAAGATATGCTTATTGTGGA	Ankib1
SRR029642.18620066	-	4	1	25	GCACTGCTTCGAGCTCACGAATGTGAAACATGTTGTAGAAGTACTCAAGAAGTG	2		0	+	NM_001003909	1259	AAGCGAGAGCCATATGAAGGACTAAGGCCCCAGGATCTTCGTAGGTTAAAAGAT	Ankib1
SRR029642.14290764	-	4	1	11	TGTTTACTGCTGAAGCACTGCTTCGAGCTCACGAATGTGAAACATGTTGTAGAA	2		0	+	NM_001003909	1259	AAGCGAGAGCCATATGAAGGACTAAGGCCCCAGGATCTTCGTAGGTTAAAAGAT	Ankib1
SRR029642.17871878	-	4	1	17	CTGCTGAAGCACTGCTTCGAGCTCACGAATGTGAAACATGTTGTAGAAGTACTC	2		0	+	NM_001003909	1259	AAGCGAGAGCCATATGAAGGACTAAGGCCCCAGGATCTTCGTAGGTTAAAAGAT	Ankib1
SRR029642.10463795	-	4	1	0	CCAGGCCCCTCTGTTTACTGCTGAAGCACTGCTTCGAGCGCACGAATGTGAAAC	2	14:T>G	0	+	NM_001003909	1273	TGAAGGACTAAGGCCCCAGGATCTTCGTAGGTTAAAAGATATGCTTATTGTGGA	Ankib1
SRR029642.16089589	-	4	1	9	TCTGTTTACTGCTGAAGCACTGCTTCGAGCTCACGAATGTGAAACATGTTGTAG	2		0	+	NM_001003909	1259	AAGCGAGAGCCATATGAAGGACTAAGGCCCCAGGATCTTCGTAGGTTAAAAGAT	Ankib1
SRR029642.15787818	-	4	1	4	GCCCCTCTGTTTACTGCTGAAGCACTGCTTCGAGCTCACGAATGTGAAACATGT	2		0	+	NM_001003909	1259	AAGCGAGAGCCATATGAAGGACTAAGGCCCCAGGATCTTCGTAGGTTAAAAGAT	Ankib1
SRR029642.15787818	-	4	1	4	GCCCCTCTGTTTACTGCTGAAGCACTGCTTCGAGCTCACGAATGTGAAACATGT	2		0	+	NM_001003909	1259	AAGCGAGAGCCATATGAAGGACTAAGGCCCCAGGATCTTCGTAGGTTAAAAGAT	Ankib1
SRR029642.10463795	-	4	1	0	CCAGGCCCCTCTGTTTACTGCTGAAGCACTGCTTCGAGCGCACGAATGTGAAAC	2	14:T>G	0	+	NM_001003909	1259	AAGCGAGAGCCATATGAAGGACTAAGGCCCCAGGATCTTCGTAGGTTAAAAGAT	Ankib1
SRR029642.14290764	-	4	1	11	TGTTTACTGCTGAAGCACTGCTTCGAGCTCACGAATGTGAAACATGTTGTAGAA	2		0	+	NM_001003909	1259	AAGCGAGAGCCATATGAAGGACTAAGGCCCCAGGATCTTCGTAGGTTAAAAGAT	Ankib1
SRR029642.10249370	-	4	1	21	TGAAGCACTGCTTCGAGCTCACGAATGTGAAACATGTTGTAGAAGTACTCAAGA	2		0	+	NM_001003909	1259	AAGCGAGAGCCATATGAAGGACTAAGGCCCCAGGATCTTCGTAGGTTAAAAGAT	Ankib1
SRR029642.11218057	-	4	1	27	ACTGCTTCGAGCTCACGAATGTGAAACATGTTGTAGAAGGACCCAAGAAGTGGC	2	11:T>C,14:T>G	0	+	NM_001003909	1259	AAGCGAGAGCCATATGAAGGACTAAGGCCCCAGGATCTTCGTAGGTTAAAAGAT	Ankib1
SRR029642.14953047	+	4	1	13	TTTACTGCTGAAGCACTGCTTCGAGCTCACGAATGTGAAACATGTTGTAGAAGT	2		2	-	NM_001003909	580	CAGAAAAAAACAAAACAGGGGAAATACAACCACCAAATTCCGCAAAGCACTCAT	Ankib1
SRR029642.11209119	-	4	1	2	AGGCCCCTCTGTTTACTGCTGAAGCACTGCTTCGAGCTCACGAATGTGAAACAT	2		0	+	NM_001003909	1259	AAGCGAGAGCCATATGAAGGACTAAGGCCCCAGGATCTTCGTAGGTTAAAAGAT	Ankib1
SRR029642.7005215	-	4	1	7	CCTCTGTTTACTGCTGAAGCACTGCTTCGAGCTCACGAATGTGAAACATGTTGT	2		0	+	NM_001003909	1273	TGAAGGACTAAGGCCCCAGGATCTTCGTAGGTTAAAAGATATGCTTATTGTGGA	Ankib1
SRR029642.11131752	-	4	1	11	TGTTTACTGCTGAAGCACTGCTTCGAGCTCACGAATGTGAAACATGTTGTAGAA	2		0	+	NM_001003909	1259	AAGCGAGAGCCATATGAAGGACTAAGGCCCCAGGATCTTCGTAGGTTAAAAGAT	Ankib1
SRR029642.7718880	-	4	1	0	CCAGGCCCCGCTGTTTACGGCTGAAGCACTGCTTCGAGCTCACGAATGTGAAAC	2	35:T>G,44:T>G	0	+	NM_001003909	1273	TGAAGGACTAAGGCCCCAGGATCTTCGTAGGTTAAAAGATATGCTTATTGTGGA	Ankib1
SRR029642.11122446	-	4	1	18	TGCTGAAGCACTGCTTCGAGCTCACGAATGTGAAACATGGTGTAGAAGTACTCA	2	14:T>G	0	+	NM_001003909	1259	AAGCGAGAGCCATATGAAGGACTAAGGCCCCAGGATCTTCGTAGGTTAAAAGAT	Ankib1
SRR029642.4461030	-	4	1	7	CCTTTTTTTACTGCTGAAGCACTGCTTCGAGCTCACGAATGTGAAACATGTTGT	2	48:G>T,50:C>T	0	+	NM_001003909	1273	TGAAGGACTAAGGCCCCAGGATCTTCGTAGGTTAAAAGATATGCTTATTGTGGA	Ankib1
SRR029642.10463795	-	4	1	0	CCAGGCCCCTCTGTTTACTGCTGAAGCACTGCTTCGAGCGCACGAATGTGAAAC	2	14:T>G	0	+	NM_001003909	1259	AAGCGAGAGCCATATGAAGGACTAAGGCCCCAGGATCTTCGTAGGTTAAAAGAT	Ankib1
SRR029642.1657678	-	4	1	0	GCAGGCCCCTCTGTTTACTGCTGAAGCACTGCTTCGAGCTCACGAATGTGAAAC	2	53:C>G	0	+	NM_001003909	1273	TGAAGGACTAAGGCCCCAGGATCTTCGTAGGTTAAAAGATATGCTTATTGTGGA	Ankib1
SRR029642.10249370	-	4	1	21	TGAAGCACTGCTTCGAGCTCACGAATGTGAAACATGTTGTAGAAGTACTCAAGA	2		0	+	NM_001003909	1259	AAGCGAGAGCCATATGAAGGACTAAGGCCCCAGGATCTTCGTAGGTTAAAAGAT	Ankib1
SRR029642.1508513	-	4	1	7	CCTCTGTTTACTGCTGAAGCACTGCTTCGAGCTCACGAATGTGAAACATGTTGT	2		0	+	NM_001003909	1273	TGAAGGACTAAGGCCCCAGGATCTTCGTAGGTTAAAAGATATGCTTATTGTGGA	Ankib1
SRR029642.9109272	-	4	1	7	CCTCTTTTTACTGCTGAAGCACTGCTTCGAGCTCACGAATGTGAAACATGTTGT	2	48:G>T	0	+	NM_001003909	1259	AAGCGAGAGCCATATGAAGGACTAAGGCCCCAGGATCTTCGTAGGTTAAAAGAT	Ankib1
SRR029642.2689911	-	4	1	0	CCAGGCCCCTCTGTTTACTGCTGAAGCACNGCTTCGAGCTCACGAATGTGAAAC	2	24:T>N	0	+	NM_001003909	1273	TGAAGGACTAAGGCCCCAGGATCTTCGTAGGTTAAAAGATATGCTTATTGTGGA	Ankib1
SRR029642.7718880	-	4	1	0	CCAGGCCCCGCTGTTTACGGCTGAAGCACTGCTTCGAGCTCACGAATGTGAAAC	2	35:T>G,44:T>G	0	+	NM_001003909	1259	AAGCGAGAGCCATATGAAGGACTAAGGCCCCAGGATCTTCGTAGGTTAAAAGAT	Ankib1
SRR029642.4428347	-	4	1	28	CTGCTTCGAGCTCACGAATGTGAAACATGTTGTAGAAGTACTCAAGAAGTGGCT	2		0	+	NM_001003909	1273	TGAAGGACTAAGGCCCCAGGATCTTCGTAGGTTAAAAGATATGCTTATTGTGGA	Ankib1
SRR029642.7005215	-	4	1	7	CCTCTGTTTACTGCTGAAGCACTGCTTCGAGCTCACGAATGTGAAACATGTTGT	2		0	+	NM_001003909	1259	AAGCGAGAGCCATATGAAGGACTAAGGCCCCAGGATCTTCGTAGGTTAAAAGAT	Ankib1
SRR029642.4461030	-	4	1	7	CCTTTTTTTACTGCTGAAGCACTGCTTCGAGCTCACGAATGTGAAACATGTTGT	2	48:G>T,50:C>T	0	+	NM_001003909	1259	AAGCGAGAGCCATATGAAGGACTAAGGCCCCAGGATCTTCGTAGGTTAAAAGAT	Ankib1
SRR029642.4428347	-	4	1	28	CTGCTTCGAGCTCACGAATGTGAAACATGTTGTAGAAGTACTCAAGAAGTGGCT	2		0	+	NM_001003909	1259	AAGCGAGAGCCATATGAAGGACTAAGGCCCCAGGATCTTCGTAGGTTAAAAGAT	Ankib1
SRR029642.2689911	-	4	1	0	CCAGGCCCCTCTGTTTACTGCTGAAGCACNGCTTCGAGCTCACGAATGTGAAAC	2	24:T>N	0	+	NM_001003909	1259	AAGCGAGAGCCATATGAAGGACTAAGGCCCCAGGATCTTCGTAGGTTAAAAGAT	Ankib1
SRR029642.1657678	-	4	1	0	GCAGGCCCCTCTGTTTACTGCTGAAGCACTGCTTCGAGCTCACGAATGTGAAAC	2	53:C>G	0	+	NM_001003909	1259	AAGCGAGAGCCATATGAAGGACTAAGGCCCCAGGATCTTCGTAGGTTAAAAGAT	Ankib1
SRR029642.1508513	-	4	1	7	CCTCTGTTTACTGCTGAAGCACTGCTTCGAGCTCACGAATGTGAAACATGTTGT	2		0	+	NM_001003909	1259	AAGCGAGAGCCATATGAAGGACTAAGGCCCCAGGATCTTCGTAGGTTAAAAGAT	Ankib1
SRR029642.18620066	-	4	1	25	GCACTGCTTCGAGCTCACGAATGTGAAACATGTTGTAGAAGTACTCAAGAAGTG	2		1	+	NM_001003909	1270	TTATGAAGGACTAAGGCCCCAGGATCTTCGTAGGTTAAAAGATATGCTTATTGT	Ankib1
SRR029642.17871878	-	4	1	17	CTGCTGAAGCACTGCTTCGAGCTCACGAATGTGAAACATGTTGTAGAAGTACTC	2		1	+	NM_001003909	1270	TTATGAAGGACTAAGGCCCCAGGATCTTCGTAGGTTAAAAGATATGCTTATTGT	Ankib1
SRR029642.16089589	-	4	1	9	TCTGTTTACTGCTGAAGCACTGCTTCGAGCTCACGAATGTGAAACATGTTGTAG	2		1	+	NM_001003909	1270	TTATGAAGGACTAAGGCCCCAGGATCTTCGTAGGTTAAAAGATATGCTTATTGT	Ankib1
SRR029642.14290764	-	4	1	11	TGTTTACTGCTGAAGCACTGCTTCGAGCTCACGAATGTGAAACATGTTGTAGAA	2		1	+	NM_001003909	1270	TTATGAAGGACTAAGGCCCCAGGATCTTCGTAGGTTAAAAGATATGCTTATTGT	Ankib1
SRR029642.11218057	-	4	1	27	ACTGCTTCGAGCTCACGAATGTGAAACATGTTGTAGAAGGACCCAAGAAGTGGC	2	11:T>C,14:T>G	1	+	NM_001003909	1270	TTATGAAGGACTAAGGCCCCAGGATCTTCGTAGGTTAAAAGATATGCTTATTGT	Ankib1
SRR029642.11209119	-	4	1	2	AGGCCCCTCTGTTTACTGCTGAAGCACTGCTTCGAGCTCACGAATGTGAAACAT	2		1	+	NM_001003909	1270	TTATGAAGGACTAAGGCCCCAGGATCTTCGTAGGTTAAAAGATATGCTTATTGT	Ankib1
SRR029642.11131752	-	4	1	11	TGTTTACTGCTGAAGCACTGCTTCGAGCTCACGAATGTGAAACATGTTGTAGAA	2		1	+	NM_001003909	1270	TTATGAAGGACTAAGGCCCCAGGATCTTCGTAGGTTAAAAGATATGCTTATTGT	Ankib1
SRR029642.11122446	-	4	1	18	TGCTGAAGCACTGCTTCGAGCTCACGAATGTGAAACATGGTGTAGAAGTACTCA	2	14:T>G	1	+	NM_001003909	1270	TTATGAAGGACTAAGGCCCCAGGATCTTCGTAGGTTAAAAGATATGCTTATTGT	Ankib1
SRR029642.10463795	-	4	1	0	CCAGGCCCCTCTGTTTACTGCTGAAGCACTGCTTCGAGCGCACGAATGTGAAAC	2	14:T>G	1	+	NM_001003909	1270	TTATGAAGGACTAAGGCCCCAGGATCTTCGTAGGTTAAAAGATATGCTTATTGT	Ankib1
SRR029642.10249370	-	4	1	21	TGAAGCACTGCTTCGAGCTCACGAATGTGAAACATGTTGTAGAAGTACTCAAGA	2		1	+	NM_001003909	1270	TTATGAAGGACTAAGGCCCCAGGATCTTCGTAGGTTAAAAGATATGCTTATTGT	Ankib1
SRR029642.9109272	-	4	1	7	CCTCTTTTTACTGCTGAAGCACTGCTTCGAGCTCACGAATGTGAAACATGTTGT	2	48:G>T	1	+	NM_001003909	1270	TTATGAAGGACTAAGGCCCCAGGATCTTCGTAGGTTAAAAGATATGCTTATTGT	Ankib1
SRR029642.7718880	-	4	1	0	CCAGGCCCCGCTGTTTACGGCTGAAGCACTGCTTCGAGCTCACGAATGTGAAAC	2	35:T>G,44:T>G	1	+	NM_001003909	1270	TTATGAAGGACTAAGGCCCCAGGATCTTCGTAGGTTAAAAGATATGCTTATTGT	Ankib1
SRR029642.7005215	-	4	1	7	CCTCTGTTTACTGCTGAAGCACTGCTTCGAGCTCACGAATGTGAAACATGTTGT	2		1	+	NM_001003909	1270	TTATGAAGGACTAAGGCCCCAGGATCTTCGTAGGTTAAAAGATATGCTTATTGT	Ankib1
SRR029642.4461030	-	4	1	7	CCTTTTTTTACTGCTGAAGCACTGCTTCGAGCTCACGAATGTGAAACATGTTGT	2	48:G>T,50:C>T	1	+	NM_001003909	1270	TTATGAAGGACTAAGGCCCCAGGATCTTCGTAGGTTAAAAGATATGCTTATTGT	Ankib1
SRR029642.4428347	-	4	1	28	CTGCTTCGAGCTCACGAATGTGAAACATGTTGTAGAAGTACTCAAGAAGTGGCT	2		1	+	NM_001003909	1270	TTATGAAGGACTAAGGCCCCAGGATCTTCGTAGGTTAAAAGATATGCTTATTGT	Ankib1
SRR029642.2689911	-	4	1	0	CCAGGCCCCTCTGTTTACTGCTGAAGCACNGCTTCGAGCTCACGAATGTGAAAC	2	24:T>N	1	+	NM_001003909	1270	TTATGAAGGACTAAGGCCCCAGGATCTTCGTAGGTTAAAAGATATGCTTATTGT	Ankib1
SRR029642.1657678	-	4	1	0	GCAGGCCCCTCTGTTTACTGCTGAAGCACTGCTTCGAGCTCACGAATGTGAAAC	2	53:C>G	1	+	NM_001003909	1270	TTATGAAGGACTAAGGCCCCAGGATCTTCGTAGGTTAAAAGATATGCTTATTGT	Ankib1
SRR029642.15787818	-	4	1	4	GCCCCTCTGTTTACTGCTGAAGCACTGCTTCGAGCTCACGAATGTGAAACATGT	2		1	+	NM_001003909	1270	TTATGAAGGACTAAGGCCCCAGGATCTTCGTAGGTTAAAAGATATGCTTATTGT	Ankib1
SRR029642.1508513	-	4	1	7	CCTCTGTTTACTGCTGAAGCACTGCTTCGAGCTCACGAATGTGAAACATGTTGT	2		1	+	NM_001003909	1270	TTATGAAGGACTAAGGCCCCAGGATCTTCGTAGGTTAAAAGATATGCTTATTGT	Ankib1
SRR029642.18620066	-	4	1	25	GCACTGCTTCGAGCTCACGAATGTGAAACATGTTGTAGAAGTACTCAAGAAGTG	2		0	+	NM_001003909	1245	ATGCTGCCTTAGACAAGCGAGAGCCATATGAAGGACTAAGGCCCCAGGATCTTC	Ankib1
SRR029642.17871878	-	4	1	17	CTGCTGAAGCACTGCTTCGAGCTCACGAATGTGAAACATGTTGTAGAAGTACTC	2		0	+	NM_001003909	1245	ATGCTGCCTTAGACAAGCGAGAGCCATATGAAGGACTAAGGCCCCAGGATCTTC	Ankib1
SRR029642.16089589	-	4	1	9	TCTGTTTACTGCTGAAGCACTGCTTCGAGCTCACGAATGTGAAACATGTTGTAG	2		0	+	NM_001003909	1245	ATGCTGCCTTAGACAAGCGAGAGCCATATGAAGGACTAAGGCCCCAGGATCTTC	Ankib1
SRR029642.15787818	-	4	1	4	GCCCCTCTGTTTACTGCTGAAGCACTGCTTCGAGCTCACGAATGTGAAACATGT	2		0	+	NM_001003909	1245	ATGCTGCCTTAGACAAGCGAGAGCCATATGAAGGACTAAGGCCCCAGGATCTTC	Ankib1
SRR029642.14290764	-	4	1	11	TGTTTACTGCTGAAGCACTGCTTCGAGCTCACGAATGTGAAACATGTTGTAGAA	2		0	+	NM_001003909	1245	ATGCTGCCTTAGACAAGCGAGAGCCATATGAAGGACTAAGGCCCCAGGATCTTC	Ankib1
SRR029642.11218057	-	4	1	27	ACTGCTTCGAGCTCACGAATGTGAAACATGTTGTAGAAGGACCCAAGAAGTGGC	2	11:T>C,14:T>G	0	+	NM_001003909	1245	ATGCTGCCTTAGACAAGCGAGAGCCATATGAAGGACTAAGGCCCCAGGATCTTC	Ankib1
SRR029642.11209119	-	4	1	2	AGGCCCCTCTGTTTACTGCTGAAGCACTGCTTCGAGCTCACGAATGTGAAACAT	2		0	+	NM_001003909	1245	ATGCTGCCTTAGACAAGCGAGAGCCATATGAAGGACTAAGGCCCCAGGATCTTC	Ankib1
SRR029642.11131752	-	4	1	11	TGTTTACTGCTGAAGCACTGCTTCGAGCTCACGAATGTGAAACATGTTGTAGAA	2		0	+	NM_001003909	1245	ATGCTGCCTTAGACAAGCGAGAGCCATATGAAGGACTAAGGCCCCAGGATCTTC	Ankib1
SRR029642.11122446	-	4	1	18	TGCTGAAGCACTGCTTCGAGCTCACGAATGTGAAACATGGTGTAGAAGTACTCA	2	14:T>G	0	+	NM_001003909	1245	ATGCTGCCTTAGACAAGCGAGAGCCATATGAAGGACTAAGGCCCCAGGATCTTC	Ankib1
SRR029642.10463795	-	4	1	0	CCAGGCCCCTCTGTTTACTGCTGAAGCACTGCTTCGAGCGCACGAATGTGAAAC	2	14:T>G	0	+	NM_001003909	1245	ATGCTGCCTTAGACAAGCGAGAGCCATATGAAGGACTAAGGCCCCAGGATCTTC	Ankib1
SRR029642.10249370	-	4	1	21	TGAAGCACTGCTTCGAGCTCACGAATGTGAAACATGTTGTAGAAGTACTCAAGA	2		0	+	NM_001003909	1245	ATGCTGCCTTAGACAAGCGAGAGCCATATGAAGGACTAAGGCCCCAGGATCTTC	Ankib1
SRR029642.9109272	-	4	1	7	CCTCTTTTTACTGCTGAAGCACTGCTTCGAGCTCACGAATGTGAAACATGTTGT	2	48:G>T	0	+	NM_001003909	1245	ATGCTGCCTTAGACAAGCGAGAGCCATATGAAGGACTAAGGCCCCAGGATCTTC	Ankib1
SRR029642.7718880	-	4	1	0	CCAGGCCCCGCTGTTTACGGCTGAAGCACTGCTTCGAGCTCACGAATGTGAAAC	2	35:T>G,44:T>G	0	+	NM_001003909	1245	ATGCTGCCTTAGACAAGCGAGAGCCATATGAAGGACTAAGGCCCCAGGATCTTC	Ankib1
SRR029642.7005215	-	4	1	7	CCTCTGTTTACTGCTGAAGCACTGCTTCGAGCTCACGAATGTGAAACATGTTGT	2		0	+	NM_001003909	1245	ATGCTGCCTTAGACAAGCGAGAGCCATATGAAGGACTAAGGCCCCAGGATCTTC	Ankib1
SRR029642.4461030	-	4	1	7	CCTTTTTTTACTGCTGAAGCACTGCTTCGAGCTCACGAATGTGAAACATGTTGT	2	48:G>T,50:C>T	0	+	NM_001003909	1245	ATGCTGCCTTAGACAAGCGAGAGCCATATGAAGGACTAAGGCCCCAGGATCTTC	Ankib1
SRR029642.4428347	-	4	1	28	CTGCTTCGAGCTCACGAATGTGAAACATGTTGTAGAAGTACTCAAGAAGTGGCT	2		0	+	NM_001003909	1245	ATGCTGCCTTAGACAAGCGAGAGCCATATGAAGGACTAAGGCCCCAGGATCTTC	Ankib1
SRR029642.2689911	-	4	1	0	CCAGGCCCCTCTGTTTACTGCTGAAGCACNGCTTCGAGCTCACGAATGTGAAAC	2	24:T>N	0	+	NM_001003909	1245	ATGCTGCCTTAGACAAGCGAGAGCCATATGAAGGACTAAGGCCCCAGGATCTTC	Ankib1
SRR029642.1657678	-	4	1	0	GCAGGCCCCTCTGTTTACTGCTGAAGCACTGCTTCGAGCTCACGAATGTGAAAC	2	53:C>G	0	+	NM_001003909	1245	ATGCTGCCTTAGACAAGCGAGAGCCATATGAAGGACTAAGGCCCCAGGATCTTC	Ankib1
SRR029642.1508513	-	4	1	7	CCTCTGTTTACTGCTGAAGCACTGCTTCGAGCTCACGAATGTGAAACATGTTGT	2		0	+	NM_001003909	1245	ATGCTGCCTTAGACAAGCGAGAGCCATATGAAGGACTAAGGCCCCAGGATCTTC	Ankib1
SRR029642.18620066	-	4	1	25	GCACTGCTTCGAGCTCACGAATGTGAAACATGTTGTAGAAGTACTCAAGAAGTG	2		0	+	NM_001003909	1247	GCTGCCTTAGACAAGCGAGAGCCATATGAAGGACTAAGGCCCCAGGATCTTCGT	Ankib1
SRR029642.15787818	-	4	1	4	GCCCCTCTGTTTACTGCTGAAGCACTGCTTCGAGCTCACGAATGTGAAACATGT	2		0	+	NM_001003909	1247	GCTGCCTTAGACAAGCGAGAGCCATATGAAGGACTAAGGCCCCAGGATCTTCGT	Ankib1
SRR029642.14290764	-	4	1	11	TGTTTACTGCTGAAGCACTGCTTCGAGCTCACGAATGTGAAACATGTTGTAGAA	2		0	+	NM_001003909	1247	GCTGCCTTAGACAAGCGAGAGCCATATGAAGGACTAAGGCCCCAGGATCTTCGT	Ankib1
SRR029642.1657678	-	4	1	0	GCAGGCCCCTCTGTTTACTGCTGAAGCACTGCTTCGAGCTCACGAATGTGAAAC	2	53:C>G	0	+	NM_001003909	1255	AGACAAGCGAGAGCCATATGAAGGACTAAGGCCCCAGGATCTTCGTAGGTTAAA	Ankib1
SRR029642.11218057	-	4	1	27	ACTGCTTCGAGCTCACGAATGTGAAACATGTTGTAGAAGGACCCAAGAAGTGGC	2	11:T>C,14:T>G	0	+	NM_001003909	1247	GCTGCCTTAGACAAGCGAGAGCCATATGAAGGACTAAGGCCCCAGGATCTTCGT	Ankib1
SRR029642.11209119	-	4	1	2	AGGCCCCTCTGTTTACTGCTGAAGCACTGCTTCGAGCTCACGAATGTGAAACAT	2		0	+	NM_001003909	1247	GCTGCCTTAGACAAGCGAGAGCCATATGAAGGACTAAGGCCCCAGGATCTTCGT	Ankib1
SRR029642.11131752	-	4	1	11	TGTTTACTGCTGAAGCACTGCTTCGAGCTCACGAATGTGAAACATGTTGTAGAA	2		0	+	NM_001003909	1247	GCTGCCTTAGACAAGCGAGAGCCATATGAAGGACTAAGGCCCCAGGATCTTCGT	Ankib1
SRR029642.7005215	-	4	1	7	CCTCTGTTTACTGCTGAAGCACTGCTTCGAGCTCACGAATGTGAAACATGTTGT	2		0	+	NM_001003909	1255	AGACAAGCGAGAGCCATATGAAGGACTAAGGCCCCAGGATCTTCGTAGGTTAAA	Ankib1
SRR029642.11122446	-	4	1	18	TGCTGAAGCACTGCTTCGAGCTCACGAATGTGAAACATGGTGTAGAAGTACTCA	2	14:T>G	0	+	NM_001003909	1247	GCTGCCTTAGACAAGCGAGAGCCATATGAAGGACTAAGGCCCCAGGATCTTCGT	Ankib1
SRR029642.10463795	-	4	1	0	CCAGGCCCCTCTGTTTACTGCTGAAGCACTGCTTCGAGCGCACGAATGTGAAAC	2	14:T>G	0	+	NM_001003909	1247	GCTGCCTTAGACAAGCGAGAGCCATATGAAGGACTAAGGCCCCAGGATCTTCGT	Ankib1
SRR029642.16089589	-	4	1	9	TCTGTTTACTGCTGAAGCACTGCTTCGAGCTCACGAATGTGAAACATGTTGTAG	2		0	+	NM_001003909	1247	GCTGCCTTAGACAAGCGAGAGCCATATGAAGGACTAAGGCCCCAGGATCTTCGT	Ankib1
SRR029642.10463795	-	4	1	0	CCAGGCCCCTCTGTTTACTGCTGAAGCACTGCTTCGAGCGCACGAATGTGAAAC	2	14:T>G	0	+	NM_001003909	1255	AGACAAGCGAGAGCCATATGAAGGACTAAGGCCCCAGGATCTTCGTAGGTTAAA	Ankib1
SRR029642.10249370	-	4	1	21	TGAAGCACTGCTTCGAGCTCACGAATGTGAAACATGTTGTAGAAGTACTCAAGA	2		0	+	NM_001003909	1247	GCTGCCTTAGACAAGCGAGAGCCATATGAAGGACTAAGGCCCCAGGATCTTCGT	Ankib1
SRR029642.11131752	-	4	1	11	TGTTTACTGCTGAAGCACTGCTTCGAGCTCACGAATGTGAAACATGTTGTAGAA	2		0	+	NM_001003909	1255	AGACAAGCGAGAGCCATATGAAGGACTAAGGCCCCAGGATCTTCGTAGGTTAAA	Ankib1
SRR029642.9109272	-	4	1	7	CCTCTTTTTACTGCTGAAGCACTGCTTCGAGCTCACGAATGTGAAACATGTTGT	2	48:G>T	0	+	NM_001003909	1247	GCTGCCTTAGACAAGCGAGAGCCATATGAAGGACTAAGGCCCCAGGATCTTCGT	Ankib1
SRR029642.11218057	-	4	1	27	ACTGCTTCGAGCTCACGAATGTGAAACATGTTGTAGAAGGACCCAAGAAGTGGC	2	11:T>C,14:T>G	0	+	NM_001003909	1255	AGACAAGCGAGAGCCATATGAAGGACTAAGGCCCCAGGATCTTCGTAGGTTAAA	Ankib1
SRR029642.17871878	-	4	1	17	CTGCTGAAGCACTGCTTCGAGCTCACGAATGTGAAACATGTTGTAGAAGTACTC	2		0	+	NM_001003909	1247	GCTGCCTTAGACAAGCGAGAGCCATATGAAGGACTAAGGCCCCAGGATCTTCGT	Ankib1
SRR029642.7718880	-	4	1	0	CCAGGCCCCGCTGTTTACGGCTGAAGCACTGCTTCGAGCTCACGAATGTGAAAC	2	35:T>G,44:T>G	0	+	NM_001003909	1247	GCTGCCTTAGACAAGCGAGAGCCATATGAAGGACTAAGGCCCCAGGATCTTCGT	Ankib1
SRR029642.7005215	-	4	1	7	CCTCTGTTTACTGCTGAAGCACTGCTTCGAGCTCACGAATGTGAAACATGTTGT	2		0	+	NM_001003909	1247	GCTGCCTTAGACAAGCGAGAGCCATATGAAGGACTAAGGCCCCAGGATCTTCGT	Ankib1
SRR029642.4461030	-	4	1	7	CCTTTTTTTACTGCTGAAGCACTGCTTCGAGCTCACGAATGTGAAACATGTTGT	2	48:G>T,50:C>T	0	+	NM_001003909	1247	GCTGCCTTAGACAAGCGAGAGCCATATGAAGGACTAAGGCCCCAGGATCTTCGT	Ankib1
SRR029642.4428347	-	4	1	28	CTGCTTCGAGCTCACGAATGTGAAACATGTTGTAGAAGTACTCAAGAAGTGGCT	2		0	+	NM_001003909	1247	GCTGCCTTAGACAAGCGAGAGCCATATGAAGGACTAAGGCCCCAGGATCTTCGT	Ankib1
SRR029642.2689911	-	4	1	0	CCAGGCCCCTCTGTTTACTGCTGAAGCACNGCTTCGAGCTCACGAATGTGAAAC	2	24:T>N	0	+	NM_001003909	1247	GCTGCCTTAGACAAGCGAGAGCCATATGAAGGACTAAGGCCCCAGGATCTTCGT	Ankib1
SRR029642.1657678	-	4	1	0	GCAGGCCCCTCTGTTTACTGCTGAAGCACTGCTTCGAGCTCACGAATGTGAAAC	2	53:C>G	0	+	NM_001003909	1247	GCTGCCTTAGACAAGCGAGAGCCATATGAAGGACTAAGGCCCCAGGATCTTCGT	Ankib1
SRR029642.16089589	-	4	1	9	TCTGTTTACTGCTGAAGCACTGCTTCGAGCTCACGAATGTGAAACATGTTGTAG	2		0	+	NM_001003909	1256	GACAAGCGAGAGCCATATGAAGGACTAAGGCCCCAGGATCTTCGTAGGTTAAAA	Ankib1
SRR029642.1508513	-	4	1	7	CCTCTGTTTACTGCTGAAGCACTGCTTCGAGCTCACGAATGTGAAACATGTTGT	2		0	+	NM_001003909	1247	GCTGCCTTAGACAAGCGAGAGCCATATGAAGGACTAAGGCCCCAGGATCTTCGT	Ankib1
SRR029642.18620066	-	4	1	25	GCACTGCTTCGAGCTCACGAATGTGAAACATGTTGTAGAAGTACTCAAGAAGTG	2		0	+	NM_001003909	1256	GACAAGCGAGAGCCATATGAAGGACTAAGGCCCCAGGATCTTCGTAGGTTAAAA	Ankib1
SRR029642.17871878	-	4	1	17	CTGCTGAAGCACTGCTTCGAGCTCACGAATGTGAAACATGTTGTAGAAGTACTC	2		0	+	NM_001003909	1256	GACAAGCGAGAGCCATATGAAGGACTAAGGCCCCAGGATCTTCGTAGGTTAAAA	Ankib1
SRR029642.15787818	-	4	1	4	GCCCCTCTGTTTACTGCTGAAGCACTGCTTCGAGCTCACGAATGTGAAACATGT	2		0	+	NM_001003909	1256	GACAAGCGAGAGCCATATGAAGGACTAAGGCCCCAGGATCTTCGTAGGTTAAAA	Ankib1
SRR029642.11218057	-	4	1	27	ACTGCTTCGAGCTCACGAATGTGAAACATGTTGTAGAAGGACCCAAGAAGTGGC	2	11:T>C,14:T>G	0	+	NM_001003909	1256	GACAAGCGAGAGCCATATGAAGGACTAAGGCCCCAGGATCTTCGTAGGTTAAAA	Ankib1
SRR029642.14290764	-	4	1	11	TGTTTACTGCTGAAGCACTGCTTCGAGCTCACGAATGTGAAACATGTTGTAGAA	2		0	+	NM_001003909	1256	GACAAGCGAGAGCCATATGAAGGACTAAGGCCCCAGGATCTTCGTAGGTTAAAA	Ankib1
SRR029642.11131752	-	4	1	11	TGTTTACTGCTGAAGCACTGCTTCGAGCTCACGAATGTGAAACATGTTGTAGAA	2		0	+	NM_001003909	1256	GACAAGCGAGAGCCATATGAAGGACTAAGGCCCCAGGATCTTCGTAGGTTAAAA	Ankib1
SRR029642.11122446	-	4	1	18	TGCTGAAGCACTGCTTCGAGCTCACGAATGTGAAACATGGTGTAGAAGTACTCA	2	14:T>G	0	+	NM_001003909	1256	GACAAGCGAGAGCCATATGAAGGACTAAGGCCCCAGGATCTTCGTAGGTTAAAA	Ankib1
SRR029642.10463795	-	4	1	0	CCAGGCCCCTCTGTTTACTGCTGAAGCACTGCTTCGAGCGCACGAATGTGAAAC	2	14:T>G	0	+	NM_001003909	1256	GACAAGCGAGAGCCATATGAAGGACTAAGGCCCCAGGATCTTCGTAGGTTAAAA	Ankib1
SRR029642.11209119	-	4	1	2	AGGCCCCTCTGTTTACTGCTGAAGCACTGCTTCGAGCTCACGAATGTGAAACAT	2		0	+	NM_001003909	1256	GACAAGCGAGAGCCATATGAAGGACTAAGGCCCCAGGATCTTCGTAGGTTAAAA	Ankib1
SRR029642.10249370	-	4	1	21	TGAAGCACTGCTTCGAGCTCACGAATGTGAAACATGTTGTAGAAGTACTCAAGA	2		0	+	NM_001003909	1256	GACAAGCGAGAGCCATATGAAGGACTAAGGCCCCAGGATCTTCGTAGGTTAAAA	Ankib1
SRR029642.9109272	-	4	1	7	CCTCTTTTTACTGCTGAAGCACTGCTTCGAGCTCACGAATGTGAAACATGTTGT	2	48:G>T	0	+	NM_001003909	1256	GACAAGCGAGAGCCATATGAAGGACTAAGGCCCCAGGATCTTCGTAGGTTAAAA	Ankib1
SRR029642.7718880	-	4	1	0	CCAGGCCCCGCTGTTTACGGCTGAAGCACTGCTTCGAGCTCACGAATGTGAAAC	2	35:T>G,44:T>G	0	+	NM_001003909	1256	GACAAGCGAGAGCCATATGAAGGACTAAGGCCCCAGGATCTTCGTAGGTTAAAA	Ankib1
SRR029642.7005215	-	4	1	7	CCTCTGTTTACTGCTGAAGCACTGCTTCGAGCTCACGAATGTGAAACATGTTGT	2		0	+	NM_001003909	1256	GACAAGCGAGAGCCATATGAAGGACTAAGGCCCCAGGATCTTCGTAGGTTAAAA	Ankib1
SRR029642.2689911	-	4	1	0	CCAGGCCCCTCTGTTTACTGCTGAAGCACNGCTTCGAGCTCACGAATGTGAAAC	2	24:T>N	0	+	NM_001003909	1256	GACAAGCGAGAGCCATATGAAGGACTAAGGCCCCAGGATCTTCGTAGGTTAAAA	Ankib1
SRR029642.2689911	-	4	1	0	CCAGGCCCCTCTGTTTACTGCTGAAGCACNGCTTCGAGCTCACGAATGTGAAAC	2	24:T>N	0	+	NM_001003909	1243	GTATGCTGCCTTAGACAAGCGAGAGCCATATGAAGGACTAAGGCCCCAGGATCT	Ankib1
SRR029642.1657678	-	4	1	0	GCAGGCCCCTCTGTTTACTGCTGAAGCACTGCTTCGAGCTCACGAATGTGAAAC	2	53:C>G	0	+	NM_001003909	1256	GACAAGCGAGAGCCATATGAAGGACTAAGGCCCCAGGATCTTCGTAGGTTAAAA	Ankib1
SRR029642.4461030	-	4	1	7	CCTTTTTTTACTGCTGAAGCACTGCTTCGAGCTCACGAATGTGAAACATGTTGT	2	48:G>T,50:C>T	0	+	NM_001003909	1256	GACAAGCGAGAGCCATATGAAGGACTAAGGCCCCAGGATCTTCGTAGGTTAAAA	Ankib1
SRR029642.4428347	-	4	1	28	CTGCTTCGAGCTCACGAATGTGAAACATGTTGTAGAAGTACTCAAGAAGTGGCT	2		0	+	NM_001003909	1256	GACAAGCGAGAGCCATATGAAGGACTAAGGCCCCAGGATCTTCGTAGGTTAAAA	Ankib1
SRR029642.7718880	-	4	1	0	CCAGGCCCCGCTGTTTACGGCTGAAGCACTGCTTCGAGCTCACGAATGTGAAAC	2	35:T>G,44:T>G	0	+	NM_001003909	1243	GTATGCTGCCTTAGACAAGCGAGAGCCATATGAAGGACTAAGGCCCCAGGATCT	Ankib1
SRR029642.1508513	-	4	1	7	CCTCTGTTTACTGCTGAAGCACTGCTTCGAGCTCACGAATGTGAAACATGTTGT	2		0	+	NM_001003909	1256	GACAAGCGAGAGCCATATGAAGGACTAAGGCCCCAGGATCTTCGTAGGTTAAAA	Ankib1
SRR029642.18620066	-	4	1	25	GCACTGCTTCGAGCTCACGAATGTGAAACATGTTGTAGAAGTACTCAAGAAGTG	2		0	+	NM_001003909	1233	TAGAAGCGGAGTATGCTGCCTTAGACAAGCGAGAGCCATATGAAGGACTAAGGC	Ankib1
SRR029642.17871878	-	4	1	17	CTGCTGAAGCACTGCTTCGAGCTCACGAATGTGAAACATGTTGTAGAAGTACTC	2		0	+	NM_001003909	1233	TAGAAGCGGAGTATGCTGCCTTAGACAAGCGAGAGCCATATGAAGGACTAAGGC	Ankib1
SRR029642.11122446	-	4	1	18	TGCTGAAGCACTGCTTCGAGCTCACGAATGTGAAACATGGTGTAGAAGTACTCA	2	14:T>G	0	+	NM_001003909	1243	GTATGCTGCCTTAGACAAGCGAGAGCCATATGAAGGACTAAGGCCCCAGGATCT	Ankib1
SRR029642.16089589	-	4	1	9	TCTGTTTACTGCTGAAGCACTGCTTCGAGCTCACGAATGTGAAACATGTTGTAG	2		0	+	NM_001003909	1233	TAGAAGCGGAGTATGCTGCCTTAGACAAGCGAGAGCCATATGAAGGACTAAGGC	Ankib1
SRR029642.15787818	-	4	1	4	GCCCCTCTGTTTACTGCTGAAGCACTGCTTCGAGCTCACGAATGTGAAACATGT	2		0	+	NM_001003909	1233	TAGAAGCGGAGTATGCTGCCTTAGACAAGCGAGAGCCATATGAAGGACTAAGGC	Ankib1
SRR029642.14290764	-	4	1	11	TGTTTACTGCTGAAGCACTGCTTCGAGCTCACGAATGTGAAACATGTTGTAGAA	2		0	+	NM_001003909	1233	TAGAAGCGGAGTATGCTGCCTTAGACAAGCGAGAGCCATATGAAGGACTAAGGC	Ankib1
SRR029642.11218057	-	4	1	27	ACTGCTTCGAGCTCACGAATGTGAAACATGTTGTAGAAGGACCCAAGAAGTGGC	2	11:T>C,14:T>G	0	+	NM_001003909	1233	TAGAAGCGGAGTATGCTGCCTTAGACAAGCGAGAGCCATATGAAGGACTAAGGC	Ankib1
SRR029642.11209119	-	4	1	2	AGGCCCCTCTGTTTACTGCTGAAGCACTGCTTCGAGCTCACGAATGTGAAACAT	2		0	+	NM_001003909	1233	TAGAAGCGGAGTATGCTGCCTTAGACAAGCGAGAGCCATATGAAGGACTAAGGC	Ankib1
SRR029642.11131752	-	4	1	11	TGTTTACTGCTGAAGCACTGCTTCGAGCTCACGAATGTGAAACATGTTGTAGAA	2		0	+	NM_001003909	1233	TAGAAGCGGAGTATGCTGCCTTAGACAAGCGAGAGCCATATGAAGGACTAAGGC	Ankib1
SRR029642.11122446	-	4	1	18	TGCTGAAGCACTGCTTCGAGCTCACGAATGTGAAACATGGTGTAGAAGTACTCA	2	14:T>G	0	+	NM_001003909	1233	TAGAAGCGGAGTATGCTGCCTTAGACAAGCGAGAGCCATATGAAGGACTAAGGC	Ankib1
SRR029642.10463795	-	4	1	0	CCAGGCCCCTCTGTTTACTGCTGAAGCACTGCTTCGAGCGCACGAATGTGAAAC	2	14:T>G	0	+	NM_001003909	1233	TAGAAGCGGAGTATGCTGCCTTAGACAAGCGAGAGCCATATGAAGGACTAAGGC	Ankib1
SRR029642.10249370	-	4	1	21	TGAAGCACTGCTTCGAGCTCACGAATGTGAAACATGTTGTAGAAGTACTCAAGA	2		0	+	NM_001003909	1233	TAGAAGCGGAGTATGCTGCCTTAGACAAGCGAGAGCCATATGAAGGACTAAGGC	Ankib1
SRR029642.9109272	-	4	1	7	CCTCTTTTTACTGCTGAAGCACTGCTTCGAGCTCACGAATGTGAAACATGTTGT	2	48:G>T	0	+	NM_001003909	1233	TAGAAGCGGAGTATGCTGCCTTAGACAAGCGAGAGCCATATGAAGGACTAAGGC	Ankib1
SRR029642.7718880	-	4	1	0	CCAGGCCCCGCTGTTTACGGCTGAAGCACTGCTTCGAGCTCACGAATGTGAAAC	2	35:T>G,44:T>G	0	+	NM_001003909	1233	TAGAAGCGGAGTATGCTGCCTTAGACAAGCGAGAGCCATATGAAGGACTAAGGC	Ankib1
SRR029642.7005215	-	4	1	7	CCTCTGTTTACTGCTGAAGCACTGCTTCGAGCTCACGAATGTGAAACATGTTGT	2		0	+	NM_001003909	1233	TAGAAGCGGAGTATGCTGCCTTAGACAAGCGAGAGCCATATGAAGGACTAAGGC	Ankib1
SRR029642.4461030	-	4	1	7	CCTTTTTTTACTGCTGAAGCACTGCTTCGAGCTCACGAATGTGAAACATGTTGT	2	48:G>T,50:C>T	0	+	NM_001003909	1233	TAGAAGCGGAGTATGCTGCCTTAGACAAGCGAGAGCCATATGAAGGACTAAGGC	Ankib1
SRR029642.4428347	-	4	1	28	CTGCTTCGAGCTCACGAATGTGAAACATGTTGTAGAAGTACTCAAGAAGTGGCT	2		0	+	NM_001003909	1233	TAGAAGCGGAGTATGCTGCCTTAGACAAGCGAGAGCCATATGAAGGACTAAGGC	Ankib1
SRR029642.2689911	-	4	1	0	CCAGGCCCCTCTGTTTACTGCTGAAGCACNGCTTCGAGCTCACGAATGTGAAAC	2	24:T>N	0	+	NM_001003909	1233	TAGAAGCGGAGTATGCTGCCTTAGACAAGCGAGAGCCATATGAAGGACTAAGGC	Ankib1
SRR029642.1657678	-	4	1	0	GCAGGCCCCTCTGTTTACTGCTGAAGCACTGCTTCGAGCTCACGAATGTGAAAC	2	53:C>G	0	+	NM_001003909	1233	TAGAAGCGGAGTATGCTGCCTTAGACAAGCGAGAGCCATATGAAGGACTAAGGC	Ankib1
SRR029642.1508513	-	4	1	7	CCTCTGTTTACTGCTGAAGCACTGCTTCGAGCTCACGAATGTGAAACATGTTGT	2		0	+	NM_001003909	1233	TAGAAGCGGAGTATGCTGCCTTAGACAAGCGAGAGCCATATGAAGGACTAAGGC	Ankib1
SRR029642.18620066	-	4	1	25	GCACTGCTTCGAGCTCACGAATGTGAAACATGTTGTAGAAGTACTCAAGAAGTG	2		0	+	NM_001003909	1243	GTATGCTGCCTTAGACAAGCGAGAGCCATATGAAGGACTAAGGCCCCAGGATCT	Ankib1
SRR029642.17871878	-	4	1	17	CTGCTGAAGCACTGCTTCGAGCTCACGAATGTGAAACATGTTGTAGAAGTACTC	2		0	+	NM_001003909	1243	GTATGCTGCCTTAGACAAGCGAGAGCCATATGAAGGACTAAGGCCCCAGGATCT	Ankib1
SRR029642.15787818	-	4	1	4	GCCCCTCTGTTTACTGCTGAAGCACTGCTTCGAGCTCACGAATGTGAAACATGT	2		0	+	NM_001003909	1243	GTATGCTGCCTTAGACAAGCGAGAGCCATATGAAGGACTAAGGCCCCAGGATCT	Ankib1
SRR029642.18620066	-	4	1	25	GCACTGCTTCGAGCTCACGAATGTGAAACATGTTGTAGAAGTACTCAAGAAGTG	2		0	+	NM_001003909	1234	AGAAGCGGAGTATGCTGCCTTAGACAAGCGAGAGCCATATGAAGGACTAAGGCC	Ankib1
SRR029642.17871878	-	4	1	17	CTGCTGAAGCACTGCTTCGAGCTCACGAATGTGAAACATGTTGTAGAAGTACTC	2		0	+	NM_001003909	1234	AGAAGCGGAGTATGCTGCCTTAGACAAGCGAGAGCCATATGAAGGACTAAGGCC	Ankib1
SRR029642.16089589	-	4	1	9	TCTGTTTACTGCTGAAGCACTGCTTCGAGCTCACGAATGTGAAACATGTTGTAG	2		0	+	NM_001003909	1243	GTATGCTGCCTTAGACAAGCGAGAGCCATATGAAGGACTAAGGCCCCAGGATCT	Ankib1
SRR029642.16089589	-	4	1	9	TCTGTTTACTGCTGAAGCACTGCTTCGAGCTCACGAATGTGAAACATGTTGTAG	2		0	+	NM_001003909	1234	AGAAGCGGAGTATGCTGCCTTAGACAAGCGAGAGCCATATGAAGGACTAAGGCC	Ankib1
SRR029642.15787818	-	4	1	4	GCCCCTCTGTTTACTGCTGAAGCACTGCTTCGAGCTCACGAATGTGAAACATGT	2		0	+	NM_001003909	1234	AGAAGCGGAGTATGCTGCCTTAGACAAGCGAGAGCCATATGAAGGACTAAGGCC	Ankib1
SRR029642.14290764	-	4	1	11	TGTTTACTGCTGAAGCACTGCTTCGAGCTCACGAATGTGAAACATGTTGTAGAA	2		0	+	NM_001003909	1234	AGAAGCGGAGTATGCTGCCTTAGACAAGCGAGAGCCATATGAAGGACTAAGGCC	Ankib1
SRR029642.11218057	-	4	1	27	ACTGCTTCGAGCTCACGAATGTGAAACATGTTGTAGAAGGACCCAAGAAGTGGC	2	11:T>C,14:T>G	0	+	NM_001003909	1234	AGAAGCGGAGTATGCTGCCTTAGACAAGCGAGAGCCATATGAAGGACTAAGGCC	Ankib1
SRR029642.11209119	-	4	1	2	AGGCCCCTCTGTTTACTGCTGAAGCACTGCTTCGAGCTCACGAATGTGAAACAT	2		0	+	NM_001003909	1234	AGAAGCGGAGTATGCTGCCTTAGACAAGCGAGAGCCATATGAAGGACTAAGGCC	Ankib1
SRR029642.11131752	-	4	1	11	TGTTTACTGCTGAAGCACTGCTTCGAGCTCACGAATGTGAAACATGTTGTAGAA	2		0	+	NM_001003909	1234	AGAAGCGGAGTATGCTGCCTTAGACAAGCGAGAGCCATATGAAGGACTAAGGCC	Ankib1
SRR029642.11122446	-	4	1	18	TGCTGAAGCACTGCTTCGAGCTCACGAATGTGAAACATGGTGTAGAAGTACTCA	2	14:T>G	0	+	NM_001003909	1234	AGAAGCGGAGTATGCTGCCTTAGACAAGCGAGAGCCATATGAAGGACTAAGGCC	Ankib1
SRR029642.10463795	-	4	1	0	CCAGGCCCCTCTGTTTACTGCTGAAGCACTGCTTCGAGCGCACGAATGTGAAAC	2	14:T>G	0	+	NM_001003909	1234	AGAAGCGGAGTATGCTGCCTTAGACAAGCGAGAGCCATATGAAGGACTAAGGCC	Ankib1
SRR029642.10249370	-	4	1	21	TGAAGCACTGCTTCGAGCTCACGAATGTGAAACATGTTGTAGAAGTACTCAAGA	2		0	+	NM_001003909	1234	AGAAGCGGAGTATGCTGCCTTAGACAAGCGAGAGCCATATGAAGGACTAAGGCC	Ankib1
SRR029642.9109272	-	4	1	7	CCTCTTTTTACTGCTGAAGCACTGCTTCGAGCTCACGAATGTGAAACATGTTGT	2	48:G>T	0	+	NM_001003909	1234	AGAAGCGGAGTATGCTGCCTTAGACAAGCGAGAGCCATATGAAGGACTAAGGCC	Ankib1
SRR029642.7718880	-	4	1	0	CCAGGCCCCGCTGTTTACGGCTGAAGCACTGCTTCGAGCTCACGAATGTGAAAC	2	35:T>G,44:T>G	0	+	NM_001003909	1234	AGAAGCGGAGTATGCTGCCTTAGACAAGCGAGAGCCATATGAAGGACTAAGGCC	Ankib1
SRR029642.7005215	-	4	1	7	CCTCTGTTTACTGCTGAAGCACTGCTTCGAGCTCACGAATGTGAAACATGTTGT	2		0	+	NM_001003909	1234	AGAAGCGGAGTATGCTGCCTTAGACAAGCGAGAGCCATATGAAGGACTAAGGCC	Ankib1
SRR029642.4461030	-	4	1	7	CCTTTTTTTACTGCTGAAGCACTGCTTCGAGCTCACGAATGTGAAACATGTTGT	2	48:G>T,50:C>T	0	+	NM_001003909	1234	AGAAGCGGAGTATGCTGCCTTAGACAAGCGAGAGCCATATGAAGGACTAAGGCC	Ankib1
SRR029642.4428347	-	4	1	28	CTGCTTCGAGCTCACGAATGTGAAACATGTTGTAGAAGTACTCAAGAAGTGGCT	2		0	+	NM_001003909	1234	AGAAGCGGAGTATGCTGCCTTAGACAAGCGAGAGCCATATGAAGGACTAAGGCC	Ankib1
SRR029642.2689911	-	4	1	0	CCAGGCCCCTCTGTTTACTGCTGAAGCACNGCTTCGAGCTCACGAATGTGAAAC	2	24:T>N	0	+	NM_001003909	1234	AGAAGCGGAGTATGCTGCCTTAGACAAGCGAGAGCCATATGAAGGACTAAGGCC	Ankib1
SRR029642.1657678	-	4	1	0	GCAGGCCCCTCTGTTTACTGCTGAAGCACTGCTTCGAGCTCACGAATGTGAAAC	2	53:C>G	0	+	NM_001003909	1234	AGAAGCGGAGTATGCTGCCTTAGACAAGCGAGAGCCATATGAAGGACTAAGGCC	Ankib1
SRR029642.4428347	-	4	1	28	CTGCTTCGAGCTCACGAATGTGAAACATGTTGTAGAAGTACTCAAGAAGTGGCT	2		1	+	NM_001003909	1255	AGACAAGCGAGAGCCATATGAAGGACTAAGGCCCCAGGATCCTCGTAGGTTAAA	Ankib1
SRR029642.1508513	-	4	1	7	CCTCTGTTTACTGCTGAAGCACTGCTTCGAGCTCACGAATGTGAAACATGTTGT	2		0	+	NM_001003909	1234	AGAAGCGGAGTATGCTGCCTTAGACAAGCGAGAGCCATATGAAGGACTAAGGCC	Ankib1
SRR029642.18620066	-	4	1	25	GCACTGCTTCGAGCTCACGAATGTGAAACATGTTGTAGAAGTACTCAAGAAGTG	2		0	+	NM_001003909	1255	AGACAAGCGAGAGCCATATGAAGGACTAAGGCCCCAGGATCTTCGTAGGTTAAA	Ankib1
SRR029642.17871878	-	4	1	17	CTGCTGAAGCACTGCTTCGAGCTCACGAATGTGAAACATGTTGTAGAAGTACTC	2		0	+	NM_001003909	1255	AGACAAGCGAGAGCCATATGAAGGACTAAGGCCCCAGGATCTTCGTAGGTTAAA	Ankib1
SRR029642.9109272	-	4	1	7	CCTCTTTTTACTGCTGAAGCACTGCTTCGAGCTCACGAATGTGAAACATGTTGT	2	48:G>T	1	+	NM_001003909	1255	AGACAAGCGAGAGCCATATGAAGGACTAAGGCCCCAGGATCCTCGTAGGTTAAA	Ankib1
SRR029642.16089589	-	4	1	9	TCTGTTTACTGCTGAAGCACTGCTTCGAGCTCACGAATGTGAAACATGTTGTAG	2		0	+	NM_001003909	1255	AGACAAGCGAGAGCCATATGAAGGACTAAGGCCCCAGGATCTTCGTAGGTTAAA	Ankib1
SRR029642.15787818	-	4	1	4	GCCCCTCTGTTTACTGCTGAAGCACTGCTTCGAGCTCACGAATGTGAAACATGT	2		0	+	NM_001003909	1255	AGACAAGCGAGAGCCATATGAAGGACTAAGGCCCCAGGATCTTCGTAGGTTAAA	Ankib1
SRR029642.14290764	-	4	1	11	TGTTTACTGCTGAAGCACTGCTTCGAGCTCACGAATGTGAAACATGTTGTAGAA	2		0	+	NM_001003909	1255	AGACAAGCGAGAGCCATATGAAGGACTAAGGCCCCAGGATCTTCGTAGGTTAAA	Ankib1
SRR029642.14290764	-	4	1	11	TGTTTACTGCTGAAGCACTGCTTCGAGCTCACGAATGTGAAACATGTTGTAGAA	2		0	+	NM_001003909	1243	GTATGCTGCCTTAGACAAGCGAGAGCCATATGAAGGACTAAGGCCCCAGGATCT	Ankib1
SRR029642.11218057	-	4	1	27	ACTGCTTCGAGCTCACGAATGTGAAACATGTTGTAGAAGGACCCAAGAAGTGGC	2	11:T>C,14:T>G	0	+	NM_001003909	1255	AGACAAGCGAGAGCCATATGAAGGACTAAGGCCCCAGGATCTTCGTAGGTTAAA	Ankib1
SRR029642.11209119	-	4	1	2	AGGCCCCTCTGTTTACTGCTGAAGCACTGCTTCGAGCTCACGAATGTGAAACAT	2		0	+	NM_001003909	1255	AGACAAGCGAGAGCCATATGAAGGACTAAGGCCCCAGGATCTTCGTAGGTTAAA	Ankib1
SRR029642.11218057	-	4	1	27	ACTGCTTCGAGCTCACGAATGTGAAACATGTTGTAGAAGGACCCAAGAAGTGGC	2	11:T>C,14:T>G	0	+	NM_001003909	1243	GTATGCTGCCTTAGACAAGCGAGAGCCATATGAAGGACTAAGGCCCCAGGATCT	Ankib1
SRR029642.11131752	-	4	1	11	TGTTTACTGCTGAAGCACTGCTTCGAGCTCACGAATGTGAAACATGTTGTAGAA	2		0	+	NM_001003909	1255	AGACAAGCGAGAGCCATATGAAGGACTAAGGCCCCAGGATCTTCGTAGGTTAAA	Ankib1
SRR029642.11122446	-	4	1	18	TGCTGAAGCACTGCTTCGAGCTCACGAATGTGAAACATGGTGTAGAAGTACTCA	2	14:T>G	0	+	NM_001003909	1255	AGACAAGCGAGAGCCATATGAAGGACTAAGGCCCCAGGATCTTCGTAGGTTAAA	Ankib1
SRR029642.10463795	-	4	1	0	CCAGGCCCCTCTGTTTACTGCTGAAGCACTGCTTCGAGCGCACGAATGTGAAAC	2	14:T>G	0	+	NM_001003909	1255	AGACAAGCGAGAGCCATATGAAGGACTAAGGCCCCAGGATCTTCGTAGGTTAAA	Ankib1
SRR029642.10249370	-	4	1	21	TGAAGCACTGCTTCGAGCTCACGAATGTGAAACATGTTGTAGAAGTACTCAAGA	2		0	+	NM_001003909	1255	AGACAAGCGAGAGCCATATGAAGGACTAAGGCCCCAGGATCTTCGTAGGTTAAA	Ankib1
SRR029642.9109272	-	4	1	7	CCTCTTTTTACTGCTGAAGCACTGCTTCGAGCTCACGAATGTGAAACATGTTGT	2	48:G>T	0	+	NM_001003909	1255	AGACAAGCGAGAGCCATATGAAGGACTAAGGCCCCAGGATCTTCGTAGGTTAAA	Ankib1
SRR029642.7718880	-	4	1	0	CCAGGCCCCGCTGTTTACGGCTGAAGCACTGCTTCGAGCTCACGAATGTGAAAC	2	35:T>G,44:T>G	0	+	NM_001003909	1255	AGACAAGCGAGAGCCATATGAAGGACTAAGGCCCCAGGATCTTCGTAGGTTAAA	Ankib1
SRR029642.11209119	-	4	1	2	AGGCCCCTCTGTTTACTGCTGAAGCACTGCTTCGAGCTCACGAATGTGAAACAT	2		0	+	NM_001003909	1243	GTATGCTGCCTTAGACAAGCGAGAGCCATATGAAGGACTAAGGCCCCAGGATCT	Ankib1
SRR029642.7005215	-	4	1	7	CCTCTGTTTACTGCTGAAGCACTGCTTCGAGCTCACGAATGTGAAACATGTTGT	2		0	+	NM_001003909	1255	AGACAAGCGAGAGCCATATGAAGGACTAAGGCCCCAGGATCTTCGTAGGTTAAA	Ankib1
SRR029642.4461030	-	4	1	7	CCTTTTTTTACTGCTGAAGCACTGCTTCGAGCTCACGAATGTGAAACATGTTGT	2	48:G>T,50:C>T	0	+	NM_001003909	1255	AGACAAGCGAGAGCCATATGAAGGACTAAGGCCCCAGGATCTTCGTAGGTTAAA	Ankib1
SRR029642.11131752	-	4	1	11	TGTTTACTGCTGAAGCACTGCTTCGAGCTCACGAATGTGAAACATGTTGTAGAA	2		0	+	NM_001003909	1243	GTATGCTGCCTTAGACAAGCGAGAGCCATATGAAGGACTAAGGCCCCAGGATCT	Ankib1
SRR029642.4428347	-	4	1	28	CTGCTTCGAGCTCACGAATGTGAAACATGTTGTAGAAGTACTCAAGAAGTGGCT	2		0	+	NM_001003909	1255	AGACAAGCGAGAGCCATATGAAGGACTAAGGCCCCAGGATCTTCGTAGGTTAAA	Ankib1
SRR029642.2689911	-	4	1	0	CCAGGCCCCTCTGTTTACTGCTGAAGCACNGCTTCGAGCTCACGAATGTGAAAC	2	24:T>N	0	+	NM_001003909	1255	AGACAAGCGAGAGCCATATGAAGGACTAAGGCCCCAGGATCTTCGTAGGTTAAA	Ankib1
SRR029642.1657678	-	4	1	0	GCAGGCCCCTCTGTTTACTGCTGAAGCACTGCTTCGAGCTCACGAATGTGAAAC	2	53:C>G	0	+	NM_001003909	1255	AGACAAGCGAGAGCCATATGAAGGACTAAGGCCCCAGGATCTTCGTAGGTTAAA	Ankib1
SRR029642.1508513	-	4	1	7	CCTCTGTTTACTGCTGAAGCACTGCTTCGAGCTCACGAATGTGAAACATGTTGT	2		0	+	NM_001003909	1255	AGACAAGCGAGAGCCATATGAAGGACTAAGGCCCCAGGATCTTCGTAGGTTAAA	Ankib1
SRR029642.11122446	-	4	1	18	TGCTGAAGCACTGCTTCGAGCTCACGAATGTGAAACATGGTGTAGAAGTACTCA	2	14:T>G	0	+	NM_001003909	1243	GTATGCTGCCTTAGACAAGCGAGAGCCATATGAAGGACTAAGGCCCCAGGATCT	Ankib1
SRR029642.10463795	-	4	1	0	CCAGGCCCCTCTGTTTACTGCTGAAGCACTGCTTCGAGCGCACGAATGTGAAAC	2	14:T>G	0	+	NM_001003909	1243	GTATGCTGCCTTAGACAAGCGAGAGCCATATGAAGGACTAAGGCCCCAGGATCT	Ankib1
SRR029642.10249370	-	4	1	21	TGAAGCACTGCTTCGAGCTCACGAATGTGAAACATGTTGTAGAAGTACTCAAGA	2		0	+	NM_001003909	1243	GTATGCTGCCTTAGACAAGCGAGAGCCATATGAAGGACTAAGGCCCCAGGATCT	Ankib1
SRR029642.9109272	-	4	1	7	CCTCTTTTTACTGCTGAAGCACTGCTTCGAGCTCACGAATGTGAAACATGTTGT	2	48:G>T	0	+	NM_001003909	1243	GTATGCTGCCTTAGACAAGCGAGAGCCATATGAAGGACTAAGGCCCCAGGATCT	Ankib1
SRR029642.7718880	-	4	1	0	CCAGGCCCCGCTGTTTACGGCTGAAGCACTGCTTCGAGCTCACGAATGTGAAAC	2	35:T>G,44:T>G	0	+	NM_001003909	1243	GTATGCTGCCTTAGACAAGCGAGAGCCATATGAAGGACTAAGGCCCCAGGATCT	Ankib1
SRR029642.7005215	-	4	1	7	CCTCTGTTTACTGCTGAAGCACTGCTTCGAGCTCACGAATGTGAAACATGTTGT	2		0	+	NM_001003909	1243	GTATGCTGCCTTAGACAAGCGAGAGCCATATGAAGGACTAAGGCCCCAGGATCT	Ankib1
SRR029642.1657678	-	4	1	0	GCAGGCCCCTCTGTTTACTGCTGAAGCACTGCTTCGAGCTCACGAATGTGAAAC	2	53:C>G	0	+	NM_001003909	1243	GTATGCTGCCTTAGACAAGCGAGAGCCATATGAAGGACTAAGGCCCCAGGATCT	Ankib1
SRR029642.4428347	-	4	1	28	CTGCTTCGAGCTCACGAATGTGAAACATGTTGTAGAAGTACTCAAGAAGTGGCT	2		0	+	NM_001003909	1243	GTATGCTGCCTTAGACAAGCGAGAGCCATATGAAGGACTAAGGCCCCAGGATCT	Ankib1
SRR029642.2689911	-	4	1	0	CCAGGCCCCTCTGTTTACTGCTGAAGCACNGCTTCGAGCTCACGAATGTGAAAC	2	24:T>N	0	+	NM_001003909	1243	GTATGCTGCCTTAGACAAGCGAGAGCCATATGAAGGACTAAGGCCCCAGGATCT	Ankib1
SRR029642.1508513	-	4	1	7	CCTCTGTTTACTGCTGAAGCACTGCTTCGAGCTCACGAATGTGAAACATGTTGT	2		0	+	NM_001003909	1243	GTATGCTGCCTTAGACAAGCGAGAGCCATATGAAGGACTAAGGCCCCAGGATCT	Ankib1
SRR029642.18620066	-	4	1	25	GCACTGCTTCGAGCTCACGAATGTGAAACATGTTGTAGAAGTACTCAAGAAGTG	2		0	+	NM_001003909	1245	ATGCTGCCTTAGACAAGCGAGAGCCATATGAAGGACTAAGGCCCCAGGATCTTC	Ankib1
SRR029642.17871878	-	4	1	17	CTGCTGAAGCACTGCTTCGAGCTCACGAATGTGAAACATGTTGTAGAAGTACTC	2		0	+	NM_001003909	1245	ATGCTGCCTTAGACAAGCGAGAGCCATATGAAGGACTAAGGCCCCAGGATCTTC	Ankib1
SRR029642.16089589	-	4	1	9	TCTGTTTACTGCTGAAGCACTGCTTCGAGCTCACGAATGTGAAACATGTTGTAG	2		0	+	NM_001003909	1245	ATGCTGCCTTAGACAAGCGAGAGCCATATGAAGGACTAAGGCCCCAGGATCTTC	Ankib1
SRR029642.15787818	-	4	1	4	GCCCCTCTGTTTACTGCTGAAGCACTGCTTCGAGCTCACGAATGTGAAACATGT	2		0	+	NM_001003909	1245	ATGCTGCCTTAGACAAGCGAGAGCCATATGAAGGACTAAGGCCCCAGGATCTTC	Ankib1
SRR029642.14290764	-	4	1	11	TGTTTACTGCTGAAGCACTGCTTCGAGCTCACGAATGTGAAACATGTTGTAGAA	2		0	+	NM_001003909	1245	ATGCTGCCTTAGACAAGCGAGAGCCATATGAAGGACTAAGGCCCCAGGATCTTC	Ankib1
SRR029642.11218057	-	4	1	27	ACTGCTTCGAGCTCACGAATGTGAAACATGTTGTAGAAGGACCCAAGAAGTGGC	2	11:T>C,14:T>G	0	+	NM_001003909	1245	ATGCTGCCTTAGACAAGCGAGAGCCATATGAAGGACTAAGGCCCCAGGATCTTC	Ankib1
SRR029642.11209119	-	4	1	2	AGGCCCCTCTGTTTACTGCTGAAGCACTGCTTCGAGCTCACGAATGTGAAACAT	2		0	+	NM_001003909	1245	ATGCTGCCTTAGACAAGCGAGAGCCATATGAAGGACTAAGGCCCCAGGATCTTC	Ankib1
SRR029642.11122446	-	4	1	18	TGCTGAAGCACTGCTTCGAGCTCACGAATGTGAAACATGGTGTAGAAGTACTCA	2	14:T>G	0	+	NM_001003909	1245	ATGCTGCCTTAGACAAGCGAGAGCCATATGAAGGACTAAGGCCCCAGGATCTTC	Ankib1
SRR029642.10463795	-	4	1	0	CCAGGCCCCTCTGTTTACTGCTGAAGCACTGCTTCGAGCGCACGAATGTGAAAC	2	14:T>G	0	+	NM_001003909	1245	ATGCTGCCTTAGACAAGCGAGAGCCATATGAAGGACTAAGGCCCCAGGATCTTC	Ankib1
SRR029642.10249370	-	4	1	21	TGAAGCACTGCTTCGAGCTCACGAATGTGAAACATGTTGTAGAAGTACTCAAGA	2		0	+	NM_001003909	1245	ATGCTGCCTTAGACAAGCGAGAGCCATATGAAGGACTAAGGCCCCAGGATCTTC	Ankib1
SRR029642.9109272	-	4	1	7	CCTCTTTTTACTGCTGAAGCACTGCTTCGAGCTCACGAATGTGAAACATGTTGT	2	48:G>T	0	+	NM_001003909	1245	ATGCTGCCTTAGACAAGCGAGAGCCATATGAAGGACTAAGGCCCCAGGATCTTC	Ankib1
SRR029642.7718880	-	4	1	0	CCAGGCCCCGCTGTTTACGGCTGAAGCACTGCTTCGAGCTCACGAATGTGAAAC	2	35:T>G,44:T>G	0	+	NM_001003909	1245	ATGCTGCCTTAGACAAGCGAGAGCCATATGAAGGACTAAGGCCCCAGGATCTTC	Ankib1
SRR029642.7005215	-	4	1	7	CCTCTGTTTACTGCTGAAGCACTGCTTCGAGCTCACGAATGTGAAACATGTTGT	2		0	+	NM_001003909	1245	ATGCTGCCTTAGACAAGCGAGAGCCATATGAAGGACTAAGGCCCCAGGATCTTC	Ankib1
SRR029642.4461030	-	4	1	7	CCTTTTTTTACTGCTGAAGCACTGCTTCGAGCTCACGAATGTGAAACATGTTGT	2	48:G>T,50:C>T	0	+	NM_001003909	1245	ATGCTGCCTTAGACAAGCGAGAGCCATATGAAGGACTAAGGCCCCAGGATCTTC	Ankib1
SRR029642.11131752	-	4	1	11	TGTTTACTGCTGAAGCACTGCTTCGAGCTCACGAATGTGAAACATGTTGTAGAA	2		0	+	NM_001003909	1245	ATGCTGCCTTAGACAAGCGAGAGCCATATGAAGGACTAAGGCCCCAGGATCTTC	Ankib1
SRR029642.4428347	-	4	1	28	CTGCTTCGAGCTCACGAATGTGAAACATGTTGTAGAAGTACTCAAGAAGTGGCT	2		0	+	NM_001003909	1245	ATGCTGCCTTAGACAAGCGAGAGCCATATGAAGGACTAAGGCCCCAGGATCTTC	Ankib1
SRR029642.2689911	-	4	1	0	CCAGGCCCCTCTGTTTACTGCTGAAGCACNGCTTCGAGCTCACGAATGTGAAAC	2	24:T>N	0	+	NM_001003909	1245	ATGCTGCCTTAGACAAGCGAGAGCCATATGAAGGACTAAGGCCCCAGGATCTTC	Ankib1
SRR029642.1657678	-	4	1	0	GCAGGCCCCTCTGTTTACTGCTGAAGCACTGCTTCGAGCTCACGAATGTGAAAC	2	53:C>G	0	+	NM_001003909	1245	ATGCTGCCTTAGACAAGCGAGAGCCATATGAAGGACTAAGGCCCCAGGATCTTC	Ankib1
SRR029642.1508513	-	4	1	7	CCTCTGTTTACTGCTGAAGCACTGCTTCGAGCTCACGAATGTGAAACATGTTGT	2		0	+	NM_001003909	1245	ATGCTGCCTTAGACAAGCGAGAGCCATATGAAGGACTAAGGCCCCAGGATCTTC	Ankib1
SRR029642.4461030	-	4	1	7	CCTTTTTTTACTGCTGAAGCACTGCTTCGAGCTCACGAATGTGAAACATGTTGT	2	48:G>T,50:C>T	0	+	NM_001003909	1243	GTATGCTGCCTTAGACAAGCGAGAGCCATATGAAGGACTAAGGCCCCAGGATCT	Ankib1
SRR029642.18620066	-	4	1	25	GCACTGCTTCGAGCTCACGAATGTGAAACATGTTGTAGAAGTACTCAAGAAGTG	2		1	+	NM_001003909	1255	AGACAAGCGAGAGCCATATGAAGGACTAAGGCCCCAGGATCCTCGTAGGTTAAA	Ankib1
SRR029642.17871878	-	4	1	17	CTGCTGAAGCACTGCTTCGAGCTCACGAATGTGAAACATGTTGTAGAAGTACTC	2		1	+	NM_001003909	1255	AGACAAGCGAGAGCCATATGAAGGACTAAGGCCCCAGGATCCTCGTAGGTTAAA	Ankib1
SRR029642.16089589	-	4	1	9	TCTGTTTACTGCTGAAGCACTGCTTCGAGCTCACGAATGTGAAACATGTTGTAG	2		1	+	NM_001003909	1255	AGACAAGCGAGAGCCATATGAAGGACTAAGGCCCCAGGATCCTCGTAGGTTAAA	Ankib1
SRR029642.15787818	-	4	1	4	GCCCCTCTGTTTACTGCTGAAGCACTGCTTCGAGCTCACGAATGTGAAACATGT	2		1	+	NM_001003909	1255	AGACAAGCGAGAGCCATATGAAGGACTAAGGCCCCAGGATCCTCGTAGGTTAAA	Ankib1
SRR029642.14290764	-	4	1	11	TGTTTACTGCTGAAGCACTGCTTCGAGCTCACGAATGTGAAACATGTTGTAGAA	2		1	+	NM_001003909	1255	AGACAAGCGAGAGCCATATGAAGGACTAAGGCCCCAGGATCCTCGTAGGTTAAA	Ankib1
SRR029642.11218057	-	4	1	27	ACTGCTTCGAGCTCACGAATGTGAAACATGTTGTAGAAGGACCCAAGAAGTGGC	2	11:T>C,14:T>G	1	+	NM_001003909	1255	AGACAAGCGAGAGCCATATGAAGGACTAAGGCCCCAGGATCCTCGTAGGTTAAA	Ankib1
SRR029642.11209119	-	4	1	2	AGGCCCCTCTGTTTACTGCTGAAGCACTGCTTCGAGCTCACGAATGTGAAACAT	2		1	+	NM_001003909	1255	AGACAAGCGAGAGCCATATGAAGGACTAAGGCCCCAGGATCCTCGTAGGTTAAA	Ankib1
SRR029642.11131752	-	4	1	11	TGTTTACTGCTGAAGCACTGCTTCGAGCTCACGAATGTGAAACATGTTGTAGAA	2		1	+	NM_001003909	1255	AGACAAGCGAGAGCCATATGAAGGACTAAGGCCCCAGGATCCTCGTAGGTTAAA	Ankib1
SRR029642.11122446	-	4	1	18	TGCTGAAGCACTGCTTCGAGCTCACGAATGTGAAACATGGTGTAGAAGTACTCA	2	14:T>G	1	+	NM_001003909	1255	AGACAAGCGAGAGCCATATGAAGGACTAAGGCCCCAGGATCCTCGTAGGTTAAA	Ankib1
SRR029642.10463795	-	4	1	0	CCAGGCCCCTCTGTTTACTGCTGAAGCACTGCTTCGAGCGCACGAATGTGAAAC	2	14:T>G	1	+	NM_001003909	1255	AGACAAGCGAGAGCCATATGAAGGACTAAGGCCCCAGGATCCTCGTAGGTTAAA	Ankib1
SRR029642.10249370	-	4	1	21	TGAAGCACTGCTTCGAGCTCACGAATGTGAAACATGTTGTAGAAGTACTCAAGA	2		1	+	NM_001003909	1255	AGACAAGCGAGAGCCATATGAAGGACTAAGGCCCCAGGATCCTCGTAGGTTAAA	Ankib1
SRR029642.18620066	-	4	1	25	GCACTGCTTCGAGCTCACGAATGTGAAACATGTTGTAGAAGTACTCAAGAAGTG	2		1	+	NM_001003909	1269	CATATGAAGGACTGAGGCCCCAGGATCTTCGTAGGTTAAAAGATATGCTTATTG	Ankib1
SRR029642.17871878	-	4	1	17	CTGCTGAAGCACTGCTTCGAGCTCACGAATGTGAAACATGTTGTAGAAGTACTC	2		1	+	NM_001003909	1269	CATATGAAGGACTGAGGCCCCAGGATCTTCGTAGGTTAAAAGATATGCTTATTG	Ankib1
SRR029642.7718880	-	4	1	0	CCAGGCCCCGCTGTTTACGGCTGAAGCACTGCTTCGAGCTCACGAATGTGAAAC	2	35:T>G,44:T>G	1	+	NM_001003909	1255	AGACAAGCGAGAGCCATATGAAGGACTAAGGCCCCAGGATCCTCGTAGGTTAAA	Ankib1
SRR029642.7005215	-	4	1	7	CCTCTGTTTACTGCTGAAGCACTGCTTCGAGCTCACGAATGTGAAACATGTTGT	2		1	+	NM_001003909	1255	AGACAAGCGAGAGCCATATGAAGGACTAAGGCCCCAGGATCCTCGTAGGTTAAA	Ankib1
SRR029642.4461030	-	4	1	7	CCTTTTTTTACTGCTGAAGCACTGCTTCGAGCTCACGAATGTGAAACATGTTGT	2	48:G>T,50:C>T	1	+	NM_001003909	1255	AGACAAGCGAGAGCCATATGAAGGACTAAGGCCCCAGGATCCTCGTAGGTTAAA	Ankib1
SRR029642.2689911	-	4	1	0	CCAGGCCCCTCTGTTTACTGCTGAAGCACNGCTTCGAGCTCACGAATGTGAAAC	2	24:T>N	1	+	NM_001003909	1255	AGACAAGCGAGAGCCATATGAAGGACTAAGGCCCCAGGATCCTCGTAGGTTAAA	Ankib1
SRR029642.1657678	-	4	1	0	GCAGGCCCCTCTGTTTACTGCTGAAGCACTGCTTCGAGCTCACGAATGTGAAAC	2	53:C>G	1	+	NM_001003909	1255	AGACAAGCGAGAGCCATATGAAGGACTAAGGCCCCAGGATCCTCGTAGGTTAAA	Ankib1
SRR029642.1508513	-	4	1	7	CCTCTGTTTACTGCTGAAGCACTGCTTCGAGCTCACGAATGTGAAACATGTTGT	2		1	+	NM_001003909	1255	AGACAAGCGAGAGCCATATGAAGGACTAAGGCCCCAGGATCCTCGTAGGTTAAA	Ankib1
SRR029642.15787818	-	4	1	4	GCCCCTCTGTTTACTGCTGAAGCACTGCTTCGAGCTCACGAATGTGAAACATGT	2		1	+	NM_001003909	1269	CATATGAAGGACTGAGGCCCCAGGATCTTCGTAGGTTAAAAGATATGCTTATTG	Ankib1
SRR029642.18620066	-	4	1	25	GCACTGCTTCGAGCTCACGAATGTGAAACATGTTGTAGAAGTACTCAAGAAGTG	2		0	+	NM_001003909	1243	GTATGCTGCCTTAGACAAGCGAGAGCCATATGAAGGACTAAGGCCCCAGGATCT	Ankib1
SRR029642.17871878	-	4	1	17	CTGCTGAAGCACTGCTTCGAGCTCACGAATGTGAAACATGTTGTAGAAGTACTC	2		0	+	NM_001003909	1243	GTATGCTGCCTTAGACAAGCGAGAGCCATATGAAGGACTAAGGCCCCAGGATCT	Ankib1
SRR029642.16089589	-	4	1	9	TCTGTTTACTGCTGAAGCACTGCTTCGAGCTCACGAATGTGAAACATGTTGTAG	2		0	+	NM_001003909	1243	GTATGCTGCCTTAGACAAGCGAGAGCCATATGAAGGACTAAGGCCCCAGGATCT	Ankib1
SRR029642.15787818	-	4	1	4	GCCCCTCTGTTTACTGCTGAAGCACTGCTTCGAGCTCACGAATGTGAAACATGT	2		0	+	NM_001003909	1243	GTATGCTGCCTTAGACAAGCGAGAGCCATATGAAGGACTAAGGCCCCAGGATCT	Ankib1
SRR029642.14290764	-	4	1	11	TGTTTACTGCTGAAGCACTGCTTCGAGCTCACGAATGTGAAACATGTTGTAGAA	2		0	+	NM_001003909	1243	GTATGCTGCCTTAGACAAGCGAGAGCCATATGAAGGACTAAGGCCCCAGGATCT	Ankib1
SRR029642.11218057	-	4	1	27	ACTGCTTCGAGCTCACGAATGTGAAACATGTTGTAGAAGGACCCAAGAAGTGGC	2	11:T>C,14:T>G	0	+	NM_001003909	1243	GTATGCTGCCTTAGACAAGCGAGAGCCATATGAAGGACTAAGGCCCCAGGATCT	Ankib1
SRR029642.11209119	-	4	1	2	AGGCCCCTCTGTTTACTGCTGAAGCACTGCTTCGAGCTCACGAATGTGAAACAT	2		0	+	NM_001003909	1243	GTATGCTGCCTTAGACAAGCGAGAGCCATATGAAGGACTAAGGCCCCAGGATCT	Ankib1
SRR029642.11131752	-	4	1	11	TGTTTACTGCTGAAGCACTGCTTCGAGCTCACGAATGTGAAACATGTTGTAGAA	2		0	+	NM_001003909	1243	GTATGCTGCCTTAGACAAGCGAGAGCCATATGAAGGACTAAGGCCCCAGGATCT	Ankib1
SRR029642.10463795	-	4	1	0	CCAGGCCCCTCTGTTTACTGCTGAAGCACTGCTTCGAGCGCACGAATGTGAAAC	2	14:T>G	0	+	NM_001003909	1243	GTATGCTGCCTTAGACAAGCGAGAGCCATATGAAGGACTAAGGCCCCAGGATCT	Ankib1
SRR029642.10249370	-	4	1	21	TGAAGCACTGCTTCGAGCTCACGAATGTGAAACATGTTGTAGAAGTACTCAAGA	2		0	+	NM_001003909	1243	GTATGCTGCCTTAGACAAGCGAGAGCCATATGAAGGACTAAGGCCCCAGGATCT	Ankib1
SRR029642.9109272	-	4	1	7	CCTCTTTTTACTGCTGAAGCACTGCTTCGAGCTCACGAATGTGAAACATGTTGT	2	48:G>T	0	+	NM_001003909	1243	GTATGCTGCCTTAGACAAGCGAGAGCCATATGAAGGACTAAGGCCCCAGGATCT	Ankib1
SRR029642.14290764	-	4	1	11	TGTTTACTGCTGAAGCACTGCTTCGAGCTCACGAATGTGAAACATGTTGTAGAA	2		1	+	NM_001003909	1269	CATATGAAGGACTGAGGCCCCAGGATCTTCGTAGGTTAAAAGATATGCTTATTG	Ankib1
SRR029642.7005215	-	4	1	7	CCTCTGTTTACTGCTGAAGCACTGCTTCGAGCTCACGAATGTGAAACATGTTGT	2		0	+	NM_001003909	1243	GTATGCTGCCTTAGACAAGCGAGAGCCATATGAAGGACTAAGGCCCCAGGATCT	Ankib1
SRR029642.4461030	-	4	1	7	CCTTTTTTTACTGCTGAAGCACTGCTTCGAGCTCACGAATGTGAAACATGTTGT	2	48:G>T,50:C>T	0	+	NM_001003909	1243	GTATGCTGCCTTAGACAAGCGAGAGCCATATGAAGGACTAAGGCCCCAGGATCT	Ankib1
SRR029642.4428347	-	4	1	28	CTGCTTCGAGCTCACGAATGTGAAACATGTTGTAGAAGTACTCAAGAAGTGGCT	2		0	+	NM_001003909	1243	GTATGCTGCCTTAGACAAGCGAGAGCCATATGAAGGACTAAGGCCCCAGGATCT	Ankib1
SRR029642.1657678	-	4	1	0	GCAGGCCCCTCTGTTTACTGCTGAAGCACTGCTTCGAGCTCACGAATGTGAAAC	2	53:C>G	0	+	NM_001003909	1243	GTATGCTGCCTTAGACAAGCGAGAGCCATATGAAGGACTAAGGCCCCAGGATCT	Ankib1
SRR029642.1508513	-	4	1	7	CCTCTGTTTACTGCTGAAGCACTGCTTCGAGCTCACGAATGTGAAACATGTTGT	2		0	+	NM_001003909	1243	GTATGCTGCCTTAGACAAGCGAGAGCCATATGAAGGACTAAGGCCCCAGGATCT	Ankib1
SRR029642.11218057	-	4	1	27	ACTGCTTCGAGCTCACGAATGTGAAACATGTTGTAGAAGGACCCAAGAAGTGGC	2	11:T>C,14:T>G	1	+	NM_001003909	1269	CATATGAAGGACTGAGGCCCCAGGATCTTCGTAGGTTAAAAGATATGCTTATTG	Ankib1
SRR029642.11209119	-	4	1	2	AGGCCCCTCTGTTTACTGCTGAAGCACTGCTTCGAGCTCACGAATGTGAAACAT	2		1	+	NM_001003909	1269	CATATGAAGGACTGAGGCCCCAGGATCTTCGTAGGTTAAAAGATATGCTTATTG	Ankib1
SRR029642.16089589	-	4	1	9	TCTGTTTACTGCTGAAGCACTGCTTCGAGCTCACGAATGTGAAACATGTTGTAG	2		1	+	NM_001003909	1269	CATATGAAGGACTGAGGCCCCAGGATCTTCGTAGGTTAAAAGATATGCTTATTG	Ankib1
SRR029642.11131752	-	4	1	11	TGTTTACTGCTGAAGCACTGCTTCGAGCTCACGAATGTGAAACATGTTGTAGAA	2		1	+	NM_001003909	1269	CATATGAAGGACTGAGGCCCCAGGATCTTCGTAGGTTAAAAGATATGCTTATTG	Ankib1
SRR029642.11122446	-	4	1	18	TGCTGAAGCACTGCTTCGAGCTCACGAATGTGAAACATGGTGTAGAAGTACTCA	2	14:T>G	1	+	NM_001003909	1269	CATATGAAGGACTGAGGCCCCAGGATCTTCGTAGGTTAAAAGATATGCTTATTG	Ankib1
SRR029642.18620066	-	4	1	25	GCACTGCTTCGAGCTCACGAATGTGAAACATGTTGTAGAAGTACTCAAGAAGTG	2		0	+	NM_001003909	1255	AGACAAGCGAGAGCCATATGAAGGACTAAGGCCCCAGGATCTTCGTAGGTTAAA	Ankib1
SRR029642.17871878	-	4	1	17	CTGCTGAAGCACTGCTTCGAGCTCACGAATGTGAAACATGTTGTAGAAGTACTC	2		0	+	NM_001003909	1255	AGACAAGCGAGAGCCATATGAAGGACTAAGGCCCCAGGATCTTCGTAGGTTAAA	Ankib1
SRR029642.10463795	-	4	1	0	CCAGGCCCCTCTGTTTACTGCTGAAGCACTGCTTCGAGCGCACGAATGTGAAAC	2	14:T>G	1	+	NM_001003909	1269	CATATGAAGGACTGAGGCCCCAGGATCTTCGTAGGTTAAAAGATATGCTTATTG	Ankib1
SRR029642.16089589	-	4	1	9	TCTGTTTACTGCTGAAGCACTGCTTCGAGCTCACGAATGTGAAACATGTTGTAG	2		0	+	NM_001003909	1255	AGACAAGCGAGAGCCATATGAAGGACTAAGGCCCCAGGATCTTCGTAGGTTAAA	Ankib1
SRR029642.15787818	-	4	1	4	GCCCCTCTGTTTACTGCTGAAGCACTGCTTCGAGCTCACGAATGTGAAACATGT	2		0	+	NM_001003909	1255	AGACAAGCGAGAGCCATATGAAGGACTAAGGCCCCAGGATCTTCGTAGGTTAAA	Ankib1
SRR029642.14290764	-	4	1	11	TGTTTACTGCTGAAGCACTGCTTCGAGCTCACGAATGTGAAACATGTTGTAGAA	2		0	+	NM_001003909	1255	AGACAAGCGAGAGCCATATGAAGGACTAAGGCCCCAGGATCTTCGTAGGTTAAA	Ankib1
SRR029642.10249370	-	4	1	21	TGAAGCACTGCTTCGAGCTCACGAATGTGAAACATGTTGTAGAAGTACTCAAGA	2		1	+	NM_001003909	1269	CATATGAAGGACTGAGGCCCCAGGATCTTCGTAGGTTAAAAGATATGCTTATTG	Ankib1
SRR029642.11209119	-	4	1	2	AGGCCCCTCTGTTTACTGCTGAAGCACTGCTTCGAGCTCACGAATGTGAAACAT	2		0	+	NM_001003909	1255	AGACAAGCGAGAGCCATATGAAGGACTAAGGCCCCAGGATCTTCGTAGGTTAAA	Ankib1
SRR029642.11122446	-	4	1	18	TGCTGAAGCACTGCTTCGAGCTCACGAATGTGAAACATGGTGTAGAAGTACTCA	2	14:T>G	0	+	NM_001003909	1255	AGACAAGCGAGAGCCATATGAAGGACTAAGGCCCCAGGATCTTCGTAGGTTAAA	Ankib1
SRR029642.9109272	-	4	1	7	CCTCTTTTTACTGCTGAAGCACTGCTTCGAGCTCACGAATGTGAAACATGTTGT	2	48:G>T	1	+	NM_001003909	1269	CATATGAAGGACTGAGGCCCCAGGATCTTCGTAGGTTAAAAGATATGCTTATTG	Ankib1
SRR029642.7718880	-	4	1	0	CCAGGCCCCGCTGTTTACGGCTGAAGCACTGCTTCGAGCTCACGAATGTGAAAC	2	35:T>G,44:T>G	1	+	NM_001003909	1269	CATATGAAGGACTGAGGCCCCAGGATCTTCGTAGGTTAAAAGATATGCTTATTG	Ankib1
SRR029642.10249370	-	4	1	21	TGAAGCACTGCTTCGAGCTCACGAATGTGAAACATGTTGTAGAAGTACTCAAGA	2		0	+	NM_001003909	1255	AGACAAGCGAGAGCCATATGAAGGACTAAGGCCCCAGGATCTTCGTAGGTTAAA	Ankib1
SRR029642.9109272	-	4	1	7	CCTCTTTTTACTGCTGAAGCACTGCTTCGAGCTCACGAATGTGAAACATGTTGT	2	48:G>T	0	+	NM_001003909	1255	AGACAAGCGAGAGCCATATGAAGGACTAAGGCCCCAGGATCTTCGTAGGTTAAA	Ankib1
SRR029642.7718880	-	4	1	0	CCAGGCCCCGCTGTTTACGGCTGAAGCACTGCTTCGAGCTCACGAATGTGAAAC	2	35:T>G,44:T>G	0	+	NM_001003909	1255	AGACAAGCGAGAGCCATATGAAGGACTAAGGCCCCAGGATCTTCGTAGGTTAAA	Ankib1
SRR029642.4461030	-	4	1	7	CCTTTTTTTACTGCTGAAGCACTGCTTCGAGCTCACGAATGTGAAACATGTTGT	2	48:G>T,50:C>T	0	+	NM_001003909	1255	AGACAAGCGAGAGCCATATGAAGGACTAAGGCCCCAGGATCTTCGTAGGTTAAA	Ankib1
SRR029642.4428347	-	4	1	28	CTGCTTCGAGCTCACGAATGTGAAACATGTTGTAGAAGTACTCAAGAAGTGGCT	2		0	+	NM_001003909	1255	AGACAAGCGAGAGCCATATGAAGGACTAAGGCCCCAGGATCTTCGTAGGTTAAA	Ankib1
SRR029642.2689911	-	4	1	0	CCAGGCCCCTCTGTTTACTGCTGAAGCACNGCTTCGAGCTCACGAATGTGAAAC	2	24:T>N	0	+	NM_001003909	1255	AGACAAGCGAGAGCCATATGAAGGACTAAGGCCCCAGGATCTTCGTAGGTTAAA	Ankib1
SRR029642.7005215	-	4	1	7	CCTCTGTTTACTGCTGAAGCACTGCTTCGAGCTCACGAATGTGAAACATGTTGT	2		1	+	NM_001003909	1269	CATATGAAGGACTGAGGCCCCAGGATCTTCGTAGGTTAAAAGATATGCTTATTG	Ankib1
SRR029642.1508513	-	4	1	7	CCTCTGTTTACTGCTGAAGCACTGCTTCGAGCTCACGAATGTGAAACATGTTGT	2		0	+	NM_001003909	1255	AGACAAGCGAGAGCCATATGAAGGACTAAGGCCCCAGGATCTTCGTAGGTTAAA	Ankib1
SRR029642.4461030	-	4	1	7	CCTTTTTTTACTGCTGAAGCACTGCTTCGAGCTCACGAATGTGAAACATGTTGT	2	48:G>T,50:C>T	1	+	NM_001003909	1269	CATATGAAGGACTGAGGCCCCAGGATCTTCGTAGGTTAAAAGATATGCTTATTG	Ankib1
SRR029642.2689911	-	4	1	0	CCAGGCCCCTCTGTTTACTGCTGAAGCACNGCTTCGAGCTCACGAATGTGAAAC	2	24:T>N	1	+	NM_001003909	1269	CATATGAAGGACTGAGGCCCCAGGATCTTCGTAGGTTAAAAGATATGCTTATTG	Ankib1
SRR029642.1657678	-	4	1	0	GCAGGCCCCTCTGTTTACTGCTGAAGCACTGCTTCGAGCTCACGAATGTGAAAC	2	53:C>G	1	+	NM_001003909	1269	CATATGAAGGACTGAGGCCCCAGGATCTTCGTAGGTTAAAAGATATGCTTATTG	Ankib1
SRR029642.1508513	-	4	1	7	CCTCTGTTTACTGCTGAAGCACTGCTTCGAGCTCACGAATGTGAAACATGTTGT	2		1	+	NM_001003909	1269	CATATGAAGGACTGAGGCCCCAGGATCTTCGTAGGTTAAAAGATATGCTTATTG	Ankib1
SRR029642.18620066	-	4	1	25	GCACTGCTTCGAGCTCACGAATGTGAAACATGTTGTAGAAGTACTCAAGAAGTG	2		0	+	NM_001003909	1255	AGACAAGCGAGAGCCATATGAAGGACTAAGGCCCCAGGATCTTCGTAGGTTAAA	Ankib1
SRR029642.17871878	-	4	1	17	CTGCTGAAGCACTGCTTCGAGCTCACGAATGTGAAACATGTTGTAGAAGTACTC	2		0	+	NM_001003909	1255	AGACAAGCGAGAGCCATATGAAGGACTAAGGCCCCAGGATCTTCGTAGGTTAAA	Ankib1
SRR029642.16089589	-	4	1	9	TCTGTTTACTGCTGAAGCACTGCTTCGAGCTCACGAATGTGAAACATGTTGTAG	2		0	+	NM_001003909	1255	AGACAAGCGAGAGCCATATGAAGGACTAAGGCCCCAGGATCTTCGTAGGTTAAA	Ankib1
SRR029642.15787818	-	4	1	4	GCCCCTCTGTTTACTGCTGAAGCACTGCTTCGAGCTCACGAATGTGAAACATGT	2		0	+	NM_001003909	1255	AGACAAGCGAGAGCCATATGAAGGACTAAGGCCCCAGGATCTTCGTAGGTTAAA	Ankib1
SRR029642.14290764	-	4	1	11	TGTTTACTGCTGAAGCACTGCTTCGAGCTCACGAATGTGAAACATGTTGTAGAA	2		0	+	NM_001003909	1255	AGACAAGCGAGAGCCATATGAAGGACTAAGGCCCCAGGATCTTCGTAGGTTAAA	Ankib1
SRR029642.11218057	-	4	1	27	ACTGCTTCGAGCTCACGAATGTGAAACATGTTGTAGAAGGACCCAAGAAGTGGC	2	11:T>C,14:T>G	0	+	NM_001003909	1255	AGACAAGCGAGAGCCATATGAAGGACTAAGGCCCCAGGATCTTCGTAGGTTAAA	Ankib1
SRR029642.18620066	-	4	1	25	GCACTGCTTCGAGCTCACGAATGTGAAACATGTTGTAGAAGTACTCAAGAAGTG	2		0	+	NM_001003909	1244	TATGCTGCCTTAGACAAGCGAGAGCCATATGAAGGACTAAGGCCCCAGGATCTT	Ankib1
SRR029642.17871878	-	4	1	17	CTGCTGAAGCACTGCTTCGAGCTCACGAATGTGAAACATGTTGTAGAAGTACTC	2		0	+	NM_001003909	1244	TATGCTGCCTTAGACAAGCGAGAGCCATATGAAGGACTAAGGCCCCAGGATCTT	Ankib1
SRR029642.16089589	-	4	1	9	TCTGTTTACTGCTGAAGCACTGCTTCGAGCTCACGAATGTGAAACATGTTGTAG	2		0	+	NM_001003909	1244	TATGCTGCCTTAGACAAGCGAGAGCCATATGAAGGACTAAGGCCCCAGGATCTT	Ankib1
SRR029642.15787818	-	4	1	4	GCCCCTCTGTTTACTGCTGAAGCACTGCTTCGAGCTCACGAATGTGAAACATGT	2		0	+	NM_001003909	1244	TATGCTGCCTTAGACAAGCGAGAGCCATATGAAGGACTAAGGCCCCAGGATCTT	Ankib1
SRR029642.11209119	-	4	1	2	AGGCCCCTCTGTTTACTGCTGAAGCACTGCTTCGAGCTCACGAATGTGAAACAT	2		0	+	NM_001003909	1255	AGACAAGCGAGAGCCATATGAAGGACTAAGGCCCCAGGATCTTCGTAGGTTAAA	Ankib1
SRR029642.14290764	-	4	1	11	TGTTTACTGCTGAAGCACTGCTTCGAGCTCACGAATGTGAAACATGTTGTAGAA	2		0	+	NM_001003909	1244	TATGCTGCCTTAGACAAGCGAGAGCCATATGAAGGACTAAGGCCCCAGGATCTT	Ankib1
SRR029642.11218057	-	4	1	27	ACTGCTTCGAGCTCACGAATGTGAAACATGTTGTAGAAGGACCCAAGAAGTGGC	2	11:T>C,14:T>G	0	+	NM_001003909	1244	TATGCTGCCTTAGACAAGCGAGAGCCATATGAAGGACTAAGGCCCCAGGATCTT	Ankib1
SRR029642.11131752	-	4	1	11	TGTTTACTGCTGAAGCACTGCTTCGAGCTCACGAATGTGAAACATGTTGTAGAA	2		0	+	NM_001003909	1255	AGACAAGCGAGAGCCATATGAAGGACTAAGGCCCCAGGATCTTCGTAGGTTAAA	Ankib1
SRR029642.11209119	-	4	1	2	AGGCCCCTCTGTTTACTGCTGAAGCACTGCTTCGAGCTCACGAATGTGAAACAT	2		0	+	NM_001003909	1244	TATGCTGCCTTAGACAAGCGAGAGCCATATGAAGGACTAAGGCCCCAGGATCTT	Ankib1
SRR029642.11131752	-	4	1	11	TGTTTACTGCTGAAGCACTGCTTCGAGCTCACGAATGTGAAACATGTTGTAGAA	2		0	+	NM_001003909	1244	TATGCTGCCTTAGACAAGCGAGAGCCATATGAAGGACTAAGGCCCCAGGATCTT	Ankib1
SRR029642.11122446	-	4	1	18	TGCTGAAGCACTGCTTCGAGCTCACGAATGTGAAACATGGTGTAGAAGTACTCA	2	14:T>G	0	+	NM_001003909	1255	AGACAAGCGAGAGCCATATGAAGGACTAAGGCCCCAGGATCTTCGTAGGTTAAA	Ankib1
SRR029642.10463795	-	4	1	0	CCAGGCCCCTCTGTTTACTGCTGAAGCACTGCTTCGAGCGCACGAATGTGAAAC	2	14:T>G	0	+	NM_001003909	1255	AGACAAGCGAGAGCCATATGAAGGACTAAGGCCCCAGGATCTTCGTAGGTTAAA	Ankib1
SRR029642.11122446	-	4	1	18	TGCTGAAGCACTGCTTCGAGCTCACGAATGTGAAACATGGTGTAGAAGTACTCA	2	14:T>G	0	+	NM_001003909	1244	TATGCTGCCTTAGACAAGCGAGAGCCATATGAAGGACTAAGGCCCCAGGATCTT	Ankib1
SRR029642.10463795	-	4	1	0	CCAGGCCCCTCTGTTTACTGCTGAAGCACTGCTTCGAGCGCACGAATGTGAAAC	2	14:T>G	0	+	NM_001003909	1244	TATGCTGCCTTAGACAAGCGAGAGCCATATGAAGGACTAAGGCCCCAGGATCTT	Ankib1
SRR029642.10249370	-	4	1	21	TGAAGCACTGCTTCGAGCTCACGAATGTGAAACATGTTGTAGAAGTACTCAAGA	2		0	+	NM_001003909	1244	TATGCTGCCTTAGACAAGCGAGAGCCATATGAAGGACTAAGGCCCCAGGATCTT	Ankib1
SRR029642.9109272	-	4	1	7	CCTCTTTTTACTGCTGAAGCACTGCTTCGAGCTCACGAATGTGAAACATGTTGT	2	48:G>T	0	+	NM_001003909	1244	TATGCTGCCTTAGACAAGCGAGAGCCATATGAAGGACTAAGGCCCCAGGATCTT	Ankib1
SRR029642.10249370	-	4	1	21	TGAAGCACTGCTTCGAGCTCACGAATGTGAAACATGTTGTAGAAGTACTCAAGA	2		0	+	NM_001003909	1255	AGACAAGCGAGAGCCATATGAAGGACTAAGGCCCCAGGATCTTCGTAGGTTAAA	Ankib1
SRR029642.7718880	-	4	1	0	CCAGGCCCCGCTGTTTACGGCTGAAGCACTGCTTCGAGCTCACGAATGTGAAAC	2	35:T>G,44:T>G	0	+	NM_001003909	1244	TATGCTGCCTTAGACAAGCGAGAGCCATATGAAGGACTAAGGCCCCAGGATCTT	Ankib1
SRR029642.7005215	-	4	1	7	CCTCTGTTTACTGCTGAAGCACTGCTTCGAGCTCACGAATGTGAAACATGTTGT	2		0	+	NM_001003909	1244	TATGCTGCCTTAGACAAGCGAGAGCCATATGAAGGACTAAGGCCCCAGGATCTT	Ankib1
SRR029642.9109272	-	4	1	7	CCTCTTTTTACTGCTGAAGCACTGCTTCGAGCTCACGAATGTGAAACATGTTGT	2	48:G>T	0	+	NM_001003909	1255	AGACAAGCGAGAGCCATATGAAGGACTAAGGCCCCAGGATCTTCGTAGGTTAAA	Ankib1
SRR029642.4461030	-	4	1	7	CCTTTTTTTACTGCTGAAGCACTGCTTCGAGCTCACGAATGTGAAACATGTTGT	2	48:G>T,50:C>T	0	+	NM_001003909	1244	TATGCTGCCTTAGACAAGCGAGAGCCATATGAAGGACTAAGGCCCCAGGATCTT	Ankib1
SRR029642.4428347	-	4	1	28	CTGCTTCGAGCTCACGAATGTGAAACATGTTGTAGAAGTACTCAAGAAGTGGCT	2		0	+	NM_001003909	1244	TATGCTGCCTTAGACAAGCGAGAGCCATATGAAGGACTAAGGCCCCAGGATCTT	Ankib1
SRR029642.4461030	-	4	1	7	CCTTTTTTTACTGCTGAAGCACTGCTTCGAGCTCACGAATGTGAAACATGTTGT	2	48:G>T,50:C>T	0	+	NM_001003909	1255	AGACAAGCGAGAGCCATATGAAGGACTAAGGCCCCAGGATCTTCGTAGGTTAAA	Ankib1
SRR029642.2689911	-	4	1	0	CCAGGCCCCTCTGTTTACTGCTGAAGCACNGCTTCGAGCTCACGAATGTGAAAC	2	24:T>N	0	+	NM_001003909	1244	TATGCTGCCTTAGACAAGCGAGAGCCATATGAAGGACTAAGGCCCCAGGATCTT	Ankib1
SRR029642.1657678	-	4	1	0	GCAGGCCCCTCTGTTTACTGCTGAAGCACTGCTTCGAGCTCACGAATGTGAAAC	2	53:C>G	0	+	NM_001003909	1244	TATGCTGCCTTAGACAAGCGAGAGCCATATGAAGGACTAAGGCCCCAGGATCTT	Ankib1
SRR029642.7005215	-	4	1	7	CCTCTGTTTACTGCTGAAGCACTGCTTCGAGCTCACGAATGTGAAACATGTTGT	2		0	+	NM_001003909	1255	AGACAAGCGAGAGCCATATGAAGGACTAAGGCCCCAGGATCTTCGTAGGTTAAA	Ankib1
SRR029642.1508513	-	4	1	7	CCTCTGTTTACTGCTGAAGCACTGCTTCGAGCTCACGAATGTGAAACATGTTGT	2		0	+	NM_001003909	1244	TATGCTGCCTTAGACAAGCGAGAGCCATATGAAGGACTAAGGCCCCAGGATCTT	Ankib1
SRR029642.4428347	-	4	1	28	CTGCTTCGAGCTCACGAATGTGAAACATGTTGTAGAAGTACTCAAGAAGTGGCT	2		1	+	NM_001003909	1269	CATATGAAGGACTGAGGCCCCAGGATCTTCGTAGGTTAAAAGATATGCTTATTG	Ankib1
SRR029642.4428347	-	4	1	28	CTGCTTCGAGCTCACGAATGTGAAACATGTTGTAGAAGTACTCAAGAAGTGGCT	2		0	+	NM_001003909	1255	AGACAAGCGAGAGCCATATGAAGGACTAAGGCCCCAGGATCTTCGTAGGTTAAA	Ankib1
SRR029642.2689911	-	4	1	0	CCAGGCCCCTCTGTTTACTGCTGAAGCACNGCTTCGAGCTCACGAATGTGAAAC	2	24:T>N	0	+	NM_001003909	1255	AGACAAGCGAGAGCCATATGAAGGACTAAGGCCCCAGGATCTTCGTAGGTTAAA	Ankib1
SRR029642.1657678	-	4	1	0	GCAGGCCCCTCTGTTTACTGCTGAAGCACTGCTTCGAGCTCACGAATGTGAAAC	2	53:C>G	0	+	NM_001003909	1255	AGACAAGCGAGAGCCATATGAAGGACTAAGGCCCCAGGATCTTCGTAGGTTAAA	Ankib1
SRR029642.1508513	-	4	1	7	CCTCTGTTTACTGCTGAAGCACTGCTTCGAGCTCACGAATGTGAAACATGTTGT	2		0	+	NM_001003909	1255	AGACAAGCGAGAGCCATATGAAGGACTAAGGCCCCAGGATCTTCGTAGGTTAAA	Ankib1
SRR029642.18620066	-	4	1	25	GCACTGCTTCGAGCTCACGAATGTGAAACATGTTGTAGAAGTACTCAAGAAGTG	2		0	+	NM_001003909	1234	AGAAGCGGAGTATGCTGCCTTAGACAAGCGAGAGCCATATGAAGGACTAAGGCC	Ankib1
SRR029642.17871878	-	4	1	17	CTGCTGAAGCACTGCTTCGAGCTCACGAATGTGAAACATGTTGTAGAAGTACTC	2		0	+	NM_001003909	1234	AGAAGCGGAGTATGCTGCCTTAGACAAGCGAGAGCCATATGAAGGACTAAGGCC	Ankib1
SRR029642.16089589	-	4	1	9	TCTGTTTACTGCTGAAGCACTGCTTCGAGCTCACGAATGTGAAACATGTTGTAG	2		0	+	NM_001003909	1234	AGAAGCGGAGTATGCTGCCTTAGACAAGCGAGAGCCATATGAAGGACTAAGGCC	Ankib1
SRR029642.15787818	-	4	1	4	GCCCCTCTGTTTACTGCTGAAGCACTGCTTCGAGCTCACGAATGTGAAACATGT	2		0	+	NM_001003909	1234	AGAAGCGGAGTATGCTGCCTTAGACAAGCGAGAGCCATATGAAGGACTAAGGCC	Ankib1
SRR029642.14290764	-	4	1	11	TGTTTACTGCTGAAGCACTGCTTCGAGCTCACGAATGTGAAACATGTTGTAGAA	2		0	+	NM_001003909	1234	AGAAGCGGAGTATGCTGCCTTAGACAAGCGAGAGCCATATGAAGGACTAAGGCC	Ankib1
SRR029642.11218057	-	4	1	27	ACTGCTTCGAGCTCACGAATGTGAAACATGTTGTAGAAGGACCCAAGAAGTGGC	2	11:T>C,14:T>G	0	+	NM_001003909	1234	AGAAGCGGAGTATGCTGCCTTAGACAAGCGAGAGCCATATGAAGGACTAAGGCC	Ankib1
SRR029642.11209119	-	4	1	2	AGGCCCCTCTGTTTACTGCTGAAGCACTGCTTCGAGCTCACGAATGTGAAACAT	2		0	+	NM_001003909	1234	AGAAGCGGAGTATGCTGCCTTAGACAAGCGAGAGCCATATGAAGGACTAAGGCC	Ankib1
SRR029642.11131752	-	4	1	11	TGTTTACTGCTGAAGCACTGCTTCGAGCTCACGAATGTGAAACATGTTGTAGAA	2		0	+	NM_001003909	1234	AGAAGCGGAGTATGCTGCCTTAGACAAGCGAGAGCCATATGAAGGACTAAGGCC	Ankib1
SRR029642.10463795	-	4	1	0	CCAGGCCCCTCTGTTTACTGCTGAAGCACTGCTTCGAGCGCACGAATGTGAAAC	2	14:T>G	0	+	NM_001003909	1234	AGAAGCGGAGTATGCTGCCTTAGACAAGCGAGAGCCATATGAAGGACTAAGGCC	Ankib1
SRR029642.10249370	-	4	1	21	TGAAGCACTGCTTCGAGCTCACGAATGTGAAACATGTTGTAGAAGTACTCAAGA	2		0	+	NM_001003909	1234	AGAAGCGGAGTATGCTGCCTTAGACAAGCGAGAGCCATATGAAGGACTAAGGCC	Ankib1
SRR029642.9109272	-	4	1	7	CCTCTTTTTACTGCTGAAGCACTGCTTCGAGCTCACGAATGTGAAACATGTTGT	2	48:G>T	0	+	NM_001003909	1234	AGAAGCGGAGTATGCTGCCTTAGACAAGCGAGAGCCATATGAAGGACTAAGGCC	Ankib1
SRR029642.7718880	-	4	1	0	CCAGGCCCCGCTGTTTACGGCTGAAGCACTGCTTCGAGCTCACGAATGTGAAAC	2	35:T>G,44:T>G	0	+	NM_001003909	1234	AGAAGCGGAGTATGCTGCCTTAGACAAGCGAGAGCCATATGAAGGACTAAGGCC	Ankib1
SRR029642.7005215	-	4	1	7	CCTCTGTTTACTGCTGAAGCACTGCTTCGAGCTCACGAATGTGAAACATGTTGT	2		0	+	NM_001003909	1234	AGAAGCGGAGTATGCTGCCTTAGACAAGCGAGAGCCATATGAAGGACTAAGGCC	Ankib1
SRR029642.4461030	-	4	1	7	CCTTTTTTTACTGCTGAAGCACTGCTTCGAGCTCACGAATGTGAAACATGTTGT	2	48:G>T,50:C>T	0	+	NM_001003909	1234	AGAAGCGGAGTATGCTGCCTTAGACAAGCGAGAGCCATATGAAGGACTAAGGCC	Ankib1
SRR029642.4428347	-	4	1	28	CTGCTTCGAGCTCACGAATGTGAAACATGTTGTAGAAGTACTCAAGAAGTGGCT	2		0	+	NM_001003909	1234	AGAAGCGGAGTATGCTGCCTTAGACAAGCGAGAGCCATATGAAGGACTAAGGCC	Ankib1
SRR029642.18620066	-	4	1	25	GCACTGCTTCGAGCTCACGAATGTGAAACATGTTGTAGAAGTACTCAAGAAGTG	2		0	+	NM_001003909	1246	TGCTGCCTTAGACAAGCGAGAGCCATATGAAGGACTAAGGCCCCAGGATCTTCG	Ankib1
SRR029642.17871878	-	4	1	17	CTGCTGAAGCACTGCTTCGAGCTCACGAATGTGAAACATGTTGTAGAAGTACTC	2		0	+	NM_001003909	1246	TGCTGCCTTAGACAAGCGAGAGCCATATGAAGGACTAAGGCCCCAGGATCTTCG	Ankib1
SRR029642.16089589	-	4	1	9	TCTGTTTACTGCTGAAGCACTGCTTCGAGCTCACGAATGTGAAACATGTTGTAG	2		0	+	NM_001003909	1246	TGCTGCCTTAGACAAGCGAGAGCCATATGAAGGACTAAGGCCCCAGGATCTTCG	Ankib1
SRR029642.15787818	-	4	1	4	GCCCCTCTGTTTACTGCTGAAGCACTGCTTCGAGCTCACGAATGTGAAACATGT	2		0	+	NM_001003909	1246	TGCTGCCTTAGACAAGCGAGAGCCATATGAAGGACTAAGGCCCCAGGATCTTCG	Ankib1
SRR029642.11131752	-	4	1	11	TGTTTACTGCTGAAGCACTGCTTCGAGCTCACGAATGTGAAACATGTTGTAGAA	2		0	+	NM_001003909	1246	TGCTGCCTTAGACAAGCGAGAGCCATATGAAGGACTAAGGCCCCAGGATCTTCG	Ankib1
SRR029642.18620066	-	4	1	25	GCACTGCTTCGAGCTCACGAATGTGAAACATGTTGTAGAAGTACTCAAGAAGTG	2		2	+	NM_001003909	1281	TAAGGCCCCAGGATCTTCGTAGGTTAAAAGATATGCTTATTGTGGAGAATGTAG	Ankib1
SRR029642.17871878	-	4	1	17	CTGCTGAAGCACTGCTTCGAGCTCACGAATGTGAAACATGTTGTAGAAGTACTC	2		2	+	NM_001003909	1281	TAAGGCCCCAGGATCTTCGTAGGTTAAAAGATATGCTTATTGTGGAGAATGTAG	Ankib1
SRR029642.16089589	-	4	1	9	TCTGTTTACTGCTGAAGCACTGCTTCGAGCTCACGAATGTGAAACATGTTGTAG	2		2	+	NM_001003909	1281	TAAGGCCCCAGGATCTTCGTAGGTTAAAAGATATGCTTATTGTGGAGAATGTAG	Ankib1
SRR029642.15787818	-	4	1	4	GCCCCTCTGTTTACTGCTGAAGCACTGCTTCGAGCTCACGAATGTGAAACATGT	2		2	+	NM_001003909	1281	TAAGGCCCCAGGATCTTCGTAGGTTAAAAGATATGCTTATTGTGGAGAATGTAG	Ankib1
SRR029642.14290764	-	4	1	11	TGTTTACTGCTGAAGCACTGCTTCGAGCTCACGAATGTGAAACATGTTGTAGAA	2		2	+	NM_001003909	1281	TAAGGCCCCAGGATCTTCGTAGGTTAAAAGATATGCTTATTGTGGAGAATGTAG	Ankib1
SRR029642.11218057	-	4	1	27	ACTGCTTCGAGCTCACGAATGTGAAACATGTTGTAGAAGGACCCAAGAAGTGGC	2	11:T>C,14:T>G	2	+	NM_001003909	1281	TAAGGCCCCAGGATCTTCGTAGGTTAAAAGATATGCTTATTGTGGAGAATGTAG	Ankib1
SRR029642.11209119	-	4	1	2	AGGCCCCTCTGTTTACTGCTGAAGCACTGCTTCGAGCTCACGAATGTGAAACAT	2		2	+	NM_001003909	1281	TAAGGCCCCAGGATCTTCGTAGGTTAAAAGATATGCTTATTGTGGAGAATGTAG	Ankib1
SRR029642.10463795	-	4	1	0	CCAGGCCCCTCTGTTTACTGCTGAAGCACTGCTTCGAGCGCACGAATGTGAAAC	2	14:T>G	0	+	NM_001003909	1246	TGCTGCCTTAGACAAGCGAGAGCCATATGAAGGACTAAGGCCCCAGGATCTTCG	Ankib1
SRR029642.11131752	-	4	1	11	TGTTTACTGCTGAAGCACTGCTTCGAGCTCACGAATGTGAAACATGTTGTAGAA	2		2	+	NM_001003909	1281	TAAGGCCCCAGGATCTTCGTAGGTTAAAAGATATGCTTATTGTGGAGAATGTAG	Ankib1
SRR029642.11122446	-	4	1	18	TGCTGAAGCACTGCTTCGAGCTCACGAATGTGAAACATGGTGTAGAAGTACTCA	2	14:T>G	2	+	NM_001003909	1281	TAAGGCCCCAGGATCTTCGTAGGTTAAAAGATATGCTTATTGTGGAGAATGTAG	Ankib1
SRR029642.10463795	-	4	1	0	CCAGGCCCCTCTGTTTACTGCTGAAGCACTGCTTCGAGCGCACGAATGTGAAAC	2	14:T>G	2	+	NM_001003909	1281	TAAGGCCCCAGGATCTTCGTAGGTTAAAAGATATGCTTATTGTGGAGAATGTAG	Ankib1
SRR029642.10249370	-	4	1	21	TGAAGCACTGCTTCGAGCTCACGAATGTGAAACATGTTGTAGAAGTACTCAAGA	2		2	+	NM_001003909	1281	TAAGGCCCCAGGATCTTCGTAGGTTAAAAGATATGCTTATTGTGGAGAATGTAG	Ankib1
SRR029642.9109272	-	4	1	7	CCTCTTTTTACTGCTGAAGCACTGCTTCGAGCTCACGAATGTGAAACATGTTGT	2	48:G>T	2	+	NM_001003909	1281	TAAGGCCCCAGGATCTTCGTAGGTTAAAAGATATGCTTATTGTGGAGAATGTAG	Ankib1
SRR029642.7718880	-	4	1	0	CCAGGCCCCGCTGTTTACGGCTGAAGCACTGCTTCGAGCTCACGAATGTGAAAC	2	35:T>G,44:T>G	2	+	NM_001003909	1281	TAAGGCCCCAGGATCTTCGTAGGTTAAAAGATATGCTTATTGTGGAGAATGTAG	Ankib1
SRR029642.7005215	-	4	1	7	CCTCTGTTTACTGCTGAAGCACTGCTTCGAGCTCACGAATGTGAAACATGTTGT	2		2	+	NM_001003909	1281	TAAGGCCCCAGGATCTTCGTAGGTTAAAAGATATGCTTATTGTGGAGAATGTAG	Ankib1
SRR029642.4461030	-	4	1	7	CCTTTTTTTACTGCTGAAGCACTGCTTCGAGCTCACGAATGTGAAACATGTTGT	2	48:G>T,50:C>T	2	+	NM_001003909	1281	TAAGGCCCCAGGATCTTCGTAGGTTAAAAGATATGCTTATTGTGGAGAATGTAG	Ankib1
SRR029642.4428347	-	4	1	28	CTGCTTCGAGCTCACGAATGTGAAACATGTTGTAGAAGTACTCAAGAAGTGGCT	2		2	+	NM_001003909	1281	TAAGGCCCCAGGATCTTCGTAGGTTAAAAGATATGCTTATTGTGGAGAATGTAG	Ankib1
SRR029642.2689911	-	4	1	0	CCAGGCCCCTCTGTTTACTGCTGAAGCACNGCTTCGAGCTCACGAATGTGAAAC	2	24:T>N	2	+	NM_001003909	1281	TAAGGCCCCAGGATCTTCGTAGGTTAAAAGATATGCTTATTGTGGAGAATGTAG	Ankib1
SRR029642.1657678	-	4	1	0	GCAGGCCCCTCTGTTTACTGCTGAAGCACTGCTTCGAGCTCACGAATGTGAAAC	2	53:C>G	2	+	NM_001003909	1281	TAAGGCCCCAGGATCTTCGTAGGTTAAAAGATATGCTTATTGTGGAGAATGTAG	Ankib1
SRR029642.1508513	-	4	1	7	CCTCTGTTTACTGCTGAAGCACTGCTTCGAGCTCACGAATGTGAAACATGTTGT	2		2	+	NM_001003909	1281	TAAGGCCCCAGGATCTTCGTAGGTTAAAAGATATGCTTATTGTGGAGAATGTAG	Ankib1
SRR029642.11218057	-	4	1	27	ACTGCTTCGAGCTCACGAATGTGAAACATGTTGTAGAAGGACCCAAGAAGTGGC	2	11:T>C,14:T>G	0	+	NM_001003909	1246	TGCTGCCTTAGACAAGCGAGAGCCATATGAAGGACTAAGGCCCCAGGATCTTCG	Ankib1
SRR029642.10249370	-	4	1	21	TGAAGCACTGCTTCGAGCTCACGAATGTGAAACATGTTGTAGAAGTACTCAAGA	2		0	+	NM_001003909	1246	TGCTGCCTTAGACAAGCGAGAGCCATATGAAGGACTAAGGCCCCAGGATCTTCG	Ankib1
SRR029642.9109272	-	4	1	7	CCTCTTTTTACTGCTGAAGCACTGCTTCGAGCTCACGAATGTGAAACATGTTGT	2	48:G>T	0	+	NM_001003909	1246	TGCTGCCTTAGACAAGCGAGAGCCATATGAAGGACTAAGGCCCCAGGATCTTCG	Ankib1
SRR029642.11209119	-	4	1	2	AGGCCCCTCTGTTTACTGCTGAAGCACTGCTTCGAGCTCACGAATGTGAAACAT	2		0	+	NM_001003909	1246	TGCTGCCTTAGACAAGCGAGAGCCATATGAAGGACTAAGGCCCCAGGATCTTCG	Ankib1
SRR029642.11122446	-	4	1	18	TGCTGAAGCACTGCTTCGAGCTCACGAATGTGAAACATGGTGTAGAAGTACTCA	2	14:T>G	0	+	NM_001003909	1246	TGCTGCCTTAGACAAGCGAGAGCCATATGAAGGACTAAGGCCCCAGGATCTTCG	Ankib1
SRR029642.7718880	-	4	1	0	CCAGGCCCCGCTGTTTACGGCTGAAGCACTGCTTCGAGCTCACGAATGTGAAAC	2	35:T>G,44:T>G	0	+	NM_001003909	1246	TGCTGCCTTAGACAAGCGAGAGCCATATGAAGGACTAAGGCCCCAGGATCTTCG	Ankib1
SRR029642.7005215	-	4	1	7	CCTCTGTTTACTGCTGAAGCACTGCTTCGAGCTCACGAATGTGAAACATGTTGT	2		0	+	NM_001003909	1246	TGCTGCCTTAGACAAGCGAGAGCCATATGAAGGACTAAGGCCCCAGGATCTTCG	Ankib1
SRR029642.4461030	-	4	1	7	CCTTTTTTTACTGCTGAAGCACTGCTTCGAGCTCACGAATGTGAAACATGTTGT	2	48:G>T,50:C>T	0	+	NM_001003909	1246	TGCTGCCTTAGACAAGCGAGAGCCATATGAAGGACTAAGGCCCCAGGATCTTCG	Ankib1
SRR029642.18620066	-	4	1	25	GCACTGCTTCGAGCTCACGAATGTGAAACATGTTGTAGAAGTACTCAAGAAGTG	2		0	+	NM_001003909	1234	AGAAGCGGAGTATGCTGCCTTAGACAAGCGAGAGCCATATGAAGGACTAAGGCC	Ankib1
SRR029642.4428347	-	4	1	28	CTGCTTCGAGCTCACGAATGTGAAACATGTTGTAGAAGTACTCAAGAAGTGGCT	2		0	+	NM_001003909	1246	TGCTGCCTTAGACAAGCGAGAGCCATATGAAGGACTAAGGCCCCAGGATCTTCG	Ankib1
SRR029642.17871878	-	4	1	17	CTGCTGAAGCACTGCTTCGAGCTCACGAATGTGAAACATGTTGTAGAAGTACTC	2		0	+	NM_001003909	1234	AGAAGCGGAGTATGCTGCCTTAGACAAGCGAGAGCCATATGAAGGACTAAGGCC	Ankib1
SRR029642.16089589	-	4	1	9	TCTGTTTACTGCTGAAGCACTGCTTCGAGCTCACGAATGTGAAACATGTTGTAG	2		0	+	NM_001003909	1234	AGAAGCGGAGTATGCTGCCTTAGACAAGCGAGAGCCATATGAAGGACTAAGGCC	Ankib1
SRR029642.15787818	-	4	1	4	GCCCCTCTGTTTACTGCTGAAGCACTGCTTCGAGCTCACGAATGTGAAACATGT	2		0	+	NM_001003909	1234	AGAAGCGGAGTATGCTGCCTTAGACAAGCGAGAGCCATATGAAGGACTAAGGCC	Ankib1
SRR029642.14290764	-	4	1	11	TGTTTACTGCTGAAGCACTGCTTCGAGCTCACGAATGTGAAACATGTTGTAGAA	2		0	+	NM_001003909	1234	AGAAGCGGAGTATGCTGCCTTAGACAAGCGAGAGCCATATGAAGGACTAAGGCC	Ankib1
SRR029642.11218057	-	4	1	27	ACTGCTTCGAGCTCACGAATGTGAAACATGTTGTAGAAGGACCCAAGAAGTGGC	2	11:T>C,14:T>G	0	+	NM_001003909	1234	AGAAGCGGAGTATGCTGCCTTAGACAAGCGAGAGCCATATGAAGGACTAAGGCC	Ankib1
SRR029642.11209119	-	4	1	2	AGGCCCCTCTGTTTACTGCTGAAGCACTGCTTCGAGCTCACGAATGTGAAACAT	2		0	+	NM_001003909	1234	AGAAGCGGAGTATGCTGCCTTAGACAAGCGAGAGCCATATGAAGGACTAAGGCC	Ankib1
SRR029642.11131752	-	4	1	11	TGTTTACTGCTGAAGCACTGCTTCGAGCTCACGAATGTGAAACATGTTGTAGAA	2		0	+	NM_001003909	1234	AGAAGCGGAGTATGCTGCCTTAGACAAGCGAGAGCCATATGAAGGACTAAGGCC	Ankib1
SRR029642.11122446	-	4	1	18	TGCTGAAGCACTGCTTCGAGCTCACGAATGTGAAACATGGTGTAGAAGTACTCA	2	14:T>G	0	+	NM_001003909	1234	AGAAGCGGAGTATGCTGCCTTAGACAAGCGAGAGCCATATGAAGGACTAAGGCC	Ankib1
SRR029642.1657678	-	4	1	0	GCAGGCCCCTCTGTTTACTGCTGAAGCACTGCTTCGAGCTCACGAATGTGAAAC	2	53:C>G	0	+	NM_001003909	1246	TGCTGCCTTAGACAAGCGAGAGCCATATGAAGGACTAAGGCCCCAGGATCTTCG	Ankib1
SRR029642.10463795	-	4	1	0	CCAGGCCCCTCTGTTTACTGCTGAAGCACTGCTTCGAGCGCACGAATGTGAAAC	2	14:T>G	0	+	NM_001003909	1234	AGAAGCGGAGTATGCTGCCTTAGACAAGCGAGAGCCATATGAAGGACTAAGGCC	Ankib1
SRR029642.10249370	-	4	1	21	TGAAGCACTGCTTCGAGCTCACGAATGTGAAACATGTTGTAGAAGTACTCAAGA	2		0	+	NM_001003909	1234	AGAAGCGGAGTATGCTGCCTTAGACAAGCGAGAGCCATATGAAGGACTAAGGCC	Ankib1
SRR029642.9109272	-	4	1	7	CCTCTTTTTACTGCTGAAGCACTGCTTCGAGCTCACGAATGTGAAACATGTTGT	2	48:G>T	0	+	NM_001003909	1234	AGAAGCGGAGTATGCTGCCTTAGACAAGCGAGAGCCATATGAAGGACTAAGGCC	Ankib1
SRR029642.7718880	-	4	1	0	CCAGGCCCCGCTGTTTACGGCTGAAGCACTGCTTCGAGCTCACGAATGTGAAAC	2	35:T>G,44:T>G	0	+	NM_001003909	1234	AGAAGCGGAGTATGCTGCCTTAGACAAGCGAGAGCCATATGAAGGACTAAGGCC	Ankib1
SRR029642.7005215	-	4	1	7	CCTCTGTTTACTGCTGAAGCACTGCTTCGAGCTCACGAATGTGAAACATGTTGT	2		0	+	NM_001003909	1234	AGAAGCGGAGTATGCTGCCTTAGACAAGCGAGAGCCATATGAAGGACTAAGGCC	Ankib1
SRR029642.4461030	-	4	1	7	CCTTTTTTTACTGCTGAAGCACTGCTTCGAGCTCACGAATGTGAAACATGTTGT	2	48:G>T,50:C>T	0	+	NM_001003909	1234	AGAAGCGGAGTATGCTGCCTTAGACAAGCGAGAGCCATATGAAGGACTAAGGCC	Ankib1
SRR029642.4428347	-	4	1	28	CTGCTTCGAGCTCACGAATGTGAAACATGTTGTAGAAGTACTCAAGAAGTGGCT	2		0	+	NM_001003909	1234	AGAAGCGGAGTATGCTGCCTTAGACAAGCGAGAGCCATATGAAGGACTAAGGCC	Ankib1
SRR029642.2689911	-	4	1	0	CCAGGCCCCTCTGTTTACTGCTGAAGCACNGCTTCGAGCTCACGAATGTGAAAC	2	24:T>N	0	+	NM_001003909	1234	AGAAGCGGAGTATGCTGCCTTAGACAAGCGAGAGCCATATGAAGGACTAAGGCC	Ankib1
SRR029642.1657678	-	4	1	0	GCAGGCCCCTCTGTTTACTGCTGAAGCACTGCTTCGAGCTCACGAATGTGAAAC	2	53:C>G	0	+	NM_001003909	1234	AGAAGCGGAGTATGCTGCCTTAGACAAGCGAGAGCCATATGAAGGACTAAGGCC	Ankib1
SRR029642.1508513	-	4	1	7	CCTCTGTTTACTGCTGAAGCACTGCTTCGAGCTCACGAATGTGAAACATGTTGT	2		0	+	NM_001003909	1234	AGAAGCGGAGTATGCTGCCTTAGACAAGCGAGAGCCATATGAAGGACTAAGGCC	Ankib1
SRR029642.2689911	-	4	1	0	CCAGGCCCCTCTGTTTACTGCTGAAGCACNGCTTCGAGCTCACGAATGTGAAAC	2	24:T>N	0	+	NM_001003909	1246	TGCTGCCTTAGACAAGCGAGAGCCATATGAAGGACTAAGGCCCCAGGATCTTCG	Ankib1
SRR029642.1508513	-	4	1	7	CCTCTGTTTACTGCTGAAGCACTGCTTCGAGCTCACGAATGTGAAACATGTTGT	2		0	+	NM_001003909	1246	TGCTGCCTTAGACAAGCGAGAGCCATATGAAGGACTAAGGCCCCAGGATCTTCG	Ankib1
SRR029642.17871878	-	4	1	17	CTGCTGAAGCACTGCTTCGAGCTCACGAATGTGAAACATGTTGTAGAAGTACTC	2		0	+	NM_001003909	1242	AGTATGCTGCCTTAGACAAGCGAGAGCCATATGAAGGACTAAGGCCCCAGGATC	Ankib1
SRR029642.16089589	-	4	1	9	TCTGTTTACTGCTGAAGCACTGCTTCGAGCTCACGAATGTGAAACATGTTGTAG	2		0	+	NM_001003909	1242	AGTATGCTGCCTTAGACAAGCGAGAGCCATATGAAGGACTAAGGCCCCAGGATC	Ankib1
SRR029642.15787818	-	4	1	4	GCCCCTCTGTTTACTGCTGAAGCACTGCTTCGAGCTCACGAATGTGAAACATGT	2		0	+	NM_001003909	1242	AGTATGCTGCCTTAGACAAGCGAGAGCCATATGAAGGACTAAGGCCCCAGGATC	Ankib1
SRR029642.14290764	-	4	1	11	TGTTTACTGCTGAAGCACTGCTTCGAGCTCACGAATGTGAAACATGTTGTAGAA	2		0	+	NM_001003909	1242	AGTATGCTGCCTTAGACAAGCGAGAGCCATATGAAGGACTAAGGCCCCAGGATC	Ankib1
SRR029642.11218057	-	4	1	27	ACTGCTTCGAGCTCACGAATGTGAAACATGTTGTAGAAGGACCCAAGAAGTGGC	2	11:T>C,14:T>G	0	+	NM_001003909	1242	AGTATGCTGCCTTAGACAAGCGAGAGCCATATGAAGGACTAAGGCCCCAGGATC	Ankib1
SRR029642.11209119	-	4	1	2	AGGCCCCTCTGTTTACTGCTGAAGCACTGCTTCGAGCTCACGAATGTGAAACAT	2		0	+	NM_001003909	1242	AGTATGCTGCCTTAGACAAGCGAGAGCCATATGAAGGACTAAGGCCCCAGGATC	Ankib1
SRR029642.11131752	-	4	1	11	TGTTTACTGCTGAAGCACTGCTTCGAGCTCACGAATGTGAAACATGTTGTAGAA	2		0	+	NM_001003909	1242	AGTATGCTGCCTTAGACAAGCGAGAGCCATATGAAGGACTAAGGCCCCAGGATC	Ankib1
SRR029642.18620066	-	4	1	25	GCACTGCTTCGAGCTCACGAATGTGAAACATGTTGTAGAAGTACTCAAGAAGTG	2		0	+	NM_001003909	1242	AGTATGCTGCCTTAGACAAGCGAGAGCCATATGAAGGACTAAGGCCCCAGGATC	Ankib1
SRR029642.10463795	-	4	1	0	CCAGGCCCCTCTGTTTACTGCTGAAGCACTGCTTCGAGCGCACGAATGTGAAAC	2	14:T>G	0	+	NM_001003909	1242	AGTATGCTGCCTTAGACAAGCGAGAGCCATATGAAGGACTAAGGCCCCAGGATC	Ankib1
SRR029642.10249370	-	4	1	21	TGAAGCACTGCTTCGAGCTCACGAATGTGAAACATGTTGTAGAAGTACTCAAGA	2		0	+	NM_001003909	1242	AGTATGCTGCCTTAGACAAGCGAGAGCCATATGAAGGACTAAGGCCCCAGGATC	Ankib1
SRR029642.9109272	-	4	1	7	CCTCTTTTTACTGCTGAAGCACTGCTTCGAGCTCACGAATGTGAAACATGTTGT	2	48:G>T	0	+	NM_001003909	1242	AGTATGCTGCCTTAGACAAGCGAGAGCCATATGAAGGACTAAGGCCCCAGGATC	Ankib1
SRR029642.7718880	-	4	1	0	CCAGGCCCCGCTGTTTACGGCTGAAGCACTGCTTCGAGCTCACGAATGTGAAAC	2	35:T>G,44:T>G	0	+	NM_001003909	1242	AGTATGCTGCCTTAGACAAGCGAGAGCCATATGAAGGACTAAGGCCCCAGGATC	Ankib1
SRR029642.7005215	-	4	1	7	CCTCTGTTTACTGCTGAAGCACTGCTTCGAGCTCACGAATGTGAAACATGTTGT	2		0	+	NM_001003909	1242	AGTATGCTGCCTTAGACAAGCGAGAGCCATATGAAGGACTAAGGCCCCAGGATC	Ankib1
SRR029642.4461030	-	4	1	7	CCTTTTTTTACTGCTGAAGCACTGCTTCGAGCTCACGAATGTGAAACATGTTGT	2	48:G>T,50:C>T	0	+	NM_001003909	1242	AGTATGCTGCCTTAGACAAGCGAGAGCCATATGAAGGACTAAGGCCCCAGGATC	Ankib1
SRR029642.4428347	-	4	1	28	CTGCTTCGAGCTCACGAATGTGAAACATGTTGTAGAAGTACTCAAGAAGTGGCT	2		0	+	NM_001003909	1242	AGTATGCTGCCTTAGACAAGCGAGAGCCATATGAAGGACTAAGGCCCCAGGATC	Ankib1
SRR029642.11122446	-	4	1	18	TGCTGAAGCACTGCTTCGAGCTCACGAATGTGAAACATGGTGTAGAAGTACTCA	2	14:T>G	0	+	NM_001003909	1242	AGTATGCTGCCTTAGACAAGCGAGAGCCATATGAAGGACTAAGGCCCCAGGATC	Ankib1
SRR029642.2689911	-	4	1	0	CCAGGCCCCTCTGTTTACTGCTGAAGCACNGCTTCGAGCTCACGAATGTGAAAC	2	24:T>N	0	+	NM_001003909	1234	AGAAGCGGAGTATGCTGCCTTAGACAAGCGAGAGCCATATGAAGGACTAAGGCC	Ankib1
SRR029642.1657678	-	4	1	0	GCAGGCCCCTCTGTTTACTGCTGAAGCACTGCTTCGAGCTCACGAATGTGAAAC	2	53:C>G	0	+	NM_001003909	1234	AGAAGCGGAGTATGCTGCCTTAGACAAGCGAGAGCCATATGAAGGACTAAGGCC	Ankib1
SRR029642.1508513	-	4	1	7	CCTCTGTTTACTGCTGAAGCACTGCTTCGAGCTCACGAATGTGAAACATGTTGT	2		0	+	NM_001003909	1234	AGAAGCGGAGTATGCTGCCTTAGACAAGCGAGAGCCATATGAAGGACTAAGGCC	Ankib1
SRR029642.1657678	-	4	1	0	GCAGGCCCCTCTGTTTACTGCTGAAGCACTGCTTCGAGCTCACGAATGTGAAAC	2	53:C>G	0	+	NM_001003909	1242	AGTATGCTGCCTTAGACAAGCGAGAGCCATATGAAGGACTAAGGCCCCAGGATC	Ankib1
SRR029642.1508513	-	4	1	7	CCTCTGTTTACTGCTGAAGCACTGCTTCGAGCTCACGAATGTGAAACATGTTGT	2		0	+	NM_001003909	1242	AGTATGCTGCCTTAGACAAGCGAGAGCCATATGAAGGACTAAGGCCCCAGGATC	Ankib1
SRR029642.2689911	-	4	1	0	CCAGGCCCCTCTGTTTACTGCTGAAGCACNGCTTCGAGCTCACGAATGTGAAAC	2	24:T>N	0	+	NM_001003909	1242	AGTATGCTGCCTTAGACAAGCGAGAGCCATATGAAGGACTAAGGCCCCAGGATC	Ankib1
SRR029642.14290764	-	4	1	11	TGTTTACTGCTGAAGCACTGCTTCGAGCTCACGAATGTGAAACATGTTGTAGAA	2		0	+	NM_001003909	1246	TGCTGCCTTAGACAAGCGAGAGCCATATGAAGGACTAAGGCCCCAGGATCTTCG	Ankib1
SRR029642.18620066	-	4	1	25	GCACTGCTTCGAGCTCACGAATGTGAAACATGTTGTAGAAGTACTCAAGAAGTG	2		2	+	NM_001003909	1238	GCGGAGTATGCTGCCTTAGACAANCGAGAGCCATATGAAGGACTAAGGCCCCCG	Ankib1
SRR029642.17871878	-	4	1	17	CTGCTGAAGCACTGCTTCGAGCTCACGAATGTGAAACATGTTGTAGAAGTACTC	2		2	+	NM_001003909	1238	GCGGAGTATGCTGCCTTAGACAANCGAGAGCCATATGAAGGACTAAGGCCCCCG	Ankib1
SRR029642.16089589	-	4	1	9	TCTGTTTACTGCTGAAGCACTGCTTCGAGCTCACGAATGTGAAACATGTTGTAG	2		2	+	NM_001003909	1238	GCGGAGTATGCTGCCTTAGACAANCGAGAGCCATATGAAGGACTAAGGCCCCCG	Ankib1
SRR029642.15787818	-	4	1	4	GCCCCTCTGTTTACTGCTGAAGCACTGCTTCGAGCTCACGAATGTGAAACATGT	2		2	+	NM_001003909	1238	GCGGAGTATGCTGCCTTAGACAANCGAGAGCCATATGAAGGACTAAGGCCCCCG	Ankib1
SRR029642.14290764	-	4	1	11	TGTTTACTGCTGAAGCACTGCTTCGAGCTCACGAATGTGAAACATGTTGTAGAA	2		2	+	NM_001003909	1238	GCGGAGTATGCTGCCTTAGACAANCGAGAGCCATATGAAGGACTAAGGCCCCCG	Ankib1
SRR029642.11218057	-	4	1	27	ACTGCTTCGAGCTCACGAATGTGAAACATGTTGTAGAAGGACCCAAGAAGTGGC	2	11:T>C,14:T>G	2	+	NM_001003909	1238	GCGGAGTATGCTGCCTTAGACAANCGAGAGCCATATGAAGGACTAAGGCCCCCG	Ankib1
SRR029642.11209119	-	4	1	2	AGGCCCCTCTGTTTACTGCTGAAGCACTGCTTCGAGCTCACGAATGTGAAACAT	2		2	+	NM_001003909	1238	GCGGAGTATGCTGCCTTAGACAANCGAGAGCCATATGAAGGACTAAGGCCCCCG	Ankib1
SRR029642.11131752	-	4	1	11	TGTTTACTGCTGAAGCACTGCTTCGAGCTCACGAATGTGAAACATGTTGTAGAA	2		2	+	NM_001003909	1238	GCGGAGTATGCTGCCTTAGACAANCGAGAGCCATATGAAGGACTAAGGCCCCCG	Ankib1
SRR029642.10463795	-	4	1	0	CCAGGCCCCTCTGTTTACTGCTGAAGCACTGCTTCGAGCGCACGAATGTGAAAC	2	14:T>G	2	+	NM_001003909	1238	GCGGAGTATGCTGCCTTAGACAANCGAGAGCCATATGAAGGACTAAGGCCCCCG	Ankib1
SRR029642.10249370	-	4	1	21	TGAAGCACTGCTTCGAGCTCACGAATGTGAAACATGTTGTAGAAGTACTCAAGA	2		2	+	NM_001003909	1238	GCGGAGTATGCTGCCTTAGACAANCGAGAGCCATATGAAGGACTAAGGCCCCCG	Ankib1
SRR029642.11122446	-	4	1	18	TGCTGAAGCACTGCTTCGAGCTCACGAATGTGAAACATGGTGTAGAAGTACTCA	2	14:T>G	2	+	NM_001003909	1238	GCGGAGTATGCTGCCTTAGACAANCGAGAGCCATATGAAGGACTAAGGCCCCCG	Ankib1
SRR029642.9109272	-	4	1	7	CCTCTTTTTACTGCTGAAGCACTGCTTCGAGCTCACGAATGTGAAACATGTTGT	2	48:G>T	2	+	NM_001003909	1238	GCGGAGTATGCTGCCTTAGACAANCGAGAGCCATATGAAGGACTAAGGCCCCCG	Ankib1
SRR029642.7718880	-	4	1	0	CCAGGCCCCGCTGTTTACGGCTGAAGCACTGCTTCGAGCTCACGAATGTGAAAC	2	35:T>G,44:T>G	2	+	NM_001003909	1238	GCGGAGTATGCTGCCTTAGACAANCGAGAGCCATATGAAGGACTAAGGCCCCCG	Ankib1
SRR029642.7005215	-	4	1	7	CCTCTGTTTACTGCTGAAGCACTGCTTCGAGCTCACGAATGTGAAACATGTTGT	2		2	+	NM_001003909	1238	GCGGAGTATGCTGCCTTAGACAANCGAGAGCCATATGAAGGACTAAGGCCCCCG	Ankib1
SRR029642.4461030	-	4	1	7	CCTTTTTTTACTGCTGAAGCACTGCTTCGAGCTCACGAATGTGAAACATGTTGT	2	48:G>T,50:C>T	2	+	NM_001003909	1238	GCGGAGTATGCTGCCTTAGACAANCGAGAGCCATATGAAGGACTAAGGCCCCCG	Ankib1
SRR029642.4428347	-	4	1	28	CTGCTTCGAGCTCACGAATGTGAAACATGTTGTAGAAGTACTCAAGAAGTGGCT	2		2	+	NM_001003909	1238	GCGGAGTATGCTGCCTTAGACAANCGAGAGCCATATGAAGGACTAAGGCCCCCG	Ankib1
SRR029642.2689911	-	4	1	0	CCAGGCCCCTCTGTTTACTGCTGAAGCACNGCTTCGAGCTCACGAATGTGAAAC	2	24:T>N	2	+	NM_001003909	1238	GCGGAGTATGCTGCCTTAGACAANCGAGAGCCATATGAAGGACTAAGGCCCCCG	Ankib1
SRR029642.1657678	-	4	1	0	GCAGGCCCCTCTGTTTACTGCTGAAGCACTGCTTCGAGCTCACGAATGTGAAAC	2	53:C>G	2	+	NM_001003909	1238	GCGGAGTATGCTGCCTTAGACAANCGAGAGCCATATGAAGGACTAAGGCCCCCG	Ankib1
SRR029642.1508513	-	4	1	7	CCTCTGTTTACTGCTGAAGCACTGCTTCGAGCTCACGAATGTGAAACATGTTGT	2		2	+	NM_001003909	1238	GCGGAGTATGCTGCCTTAGACAANCGAGAGCCATATGAAGGACTAAGGCCCCCG	Ankib1
SRR029642.16089589	-	4	1	9	TCTGTTTACTGCTGAAGCACTGCTTCGAGCTCACGAATGTGAAACATGTTGTAG	2		1	+	NM_001003909	1244	TATGCTGCCTTAGACAAGAGAGAGCCATATGAAGGACTAAGGCCCCAGGATCTT	Ankib1
SRR029642.18620066	-	4	1	25	GCACTGCTTCGAGCTCACGAATGTGAAACATGTTGTAGAAGTACTCAAGAAGTG	2		1	+	NM_001003909	1244	TATGCTGCCTTAGACAAGAGAGAGCCATATGAAGGACTAAGGCCCCAGGATCTT	Ankib1
SRR029642.17871878	-	4	1	17	CTGCTGAAGCACTGCTTCGAGCTCACGAATGTGAAACATGTTGTAGAAGTACTC	2		1	+	NM_001003909	1244	TATGCTGCCTTAGACAAGAGAGAGCCATATGAAGGACTAAGGCCCCAGGATCTT	Ankib1
SRR029642.15787818	-	4	1	4	GCCCCTCTGTTTACTGCTGAAGCACTGCTTCGAGCTCACGAATGTGAAACATGT	2		1	+	NM_001003909	1244	TATGCTGCCTTAGACAAGAGAGAGCCATATGAAGGACTAAGGCCCCAGGATCTT	Ankib1
SRR029642.14290764	-	4	1	11	TGTTTACTGCTGAAGCACTGCTTCGAGCTCACGAATGTGAAACATGTTGTAGAA	2		1	+	NM_001003909	1244	TATGCTGCCTTAGACAAGAGAGAGCCATATGAAGGACTAAGGCCCCAGGATCTT	Ankib1
SRR029642.11218057	-	4	1	27	ACTGCTTCGAGCTCACGAATGTGAAACATGTTGTAGAAGGACCCAAGAAGTGGC	2	11:T>C,14:T>G	1	+	NM_001003909	1244	TATGCTGCCTTAGACAAGAGAGAGCCATATGAAGGACTAAGGCCCCAGGATCTT	Ankib1
SRR029642.11209119	-	4	1	2	AGGCCCCTCTGTTTACTGCTGAAGCACTGCTTCGAGCTCACGAATGTGAAACAT	2		1	+	NM_001003909	1244	TATGCTGCCTTAGACAAGAGAGAGCCATATGAAGGACTAAGGCCCCAGGATCTT	Ankib1
SRR029642.11131752	-	4	1	11	TGTTTACTGCTGAAGCACTGCTTCGAGCTCACGAATGTGAAACATGTTGTAGAA	2		1	+	NM_001003909	1244	TATGCTGCCTTAGACAAGAGAGAGCCATATGAAGGACTAAGGCCCCAGGATCTT	Ankib1
SRR029642.18620066	-	4	1	25	GCACTGCTTCGAGCTCACGAATGTGAAACATGTTGTAGAAGTACTCAAGAAGTG	2		0	+	NM_001003909	1252	CTTAGACAAGCGAGAGCCATATGAAGGACTAAGGCCCCAGGATCTTCGTAGGTT	Ankib1
SRR029642.17871878	-	4	1	17	CTGCTGAAGCACTGCTTCGAGCTCACGAATGTGAAACATGTTGTAGAAGTACTC	2		0	+	NM_001003909	1252	CTTAGACAAGCGAGAGCCATATGAAGGACTAAGGCCCCAGGATCTTCGTAGGTT	Ankib1
SRR029642.16089589	-	4	1	9	TCTGTTTACTGCTGAAGCACTGCTTCGAGCTCACGAATGTGAAACATGTTGTAG	2		0	+	NM_001003909	1252	CTTAGACAAGCGAGAGCCATATGAAGGACTAAGGCCCCAGGATCTTCGTAGGTT	Ankib1
SRR029642.4383455	+	7	1	9	GGTGCCTTTGTCTGGCGATGATGAAAGTTATACAGATCCAGGATGAGAAGACTG	2		0	-	NM_001025572	229	TTCACAAAACCAGTTCAGAGTGAAAATTCTGACAGTGACAGCAGTATGGTGGAG	Ankrd12
SRR029642.11200132	+	7	1	19	TCTGGCGATGATGAAAGTTATACAGATCCAGGATGAGAAGACTGTTAGAAGAAG	2		0	-	NM_001025572	234	AAAACCAGTTCAGAGTGAAAATTCTGACAGTGACAGCAGTATGGTGGAGAGGCC	Ankrd12
SRR029642.15235837	+	7	1	16	TTGTCTGGCGATGATGAAAGTTATACAGATCCCGGATGAGAAGACTGTTAGAAG	2	32:A>C	0	-	NM_001025572	226	GGGTTCACAAAACCAGTTCAGAGTGAAAATTCTGACAGTGACAGCAGTATGGTG	Ankrd12
SRR029642.12367356	+	7	1	5	GAGAGGTGCCTTTGTCTGGCGATGATGAAAGTTATACAGATCCAGGATGAGAAG	2		0	-	NM_001025572	222	ATCTGGGTTCACAAAACCAGTTCAGAGTGAAAATTCTGACAGTGACAGCAGTAT	Ankrd12
SRR029642.9437943	+	7	1	15	TTTGTCTGGCGATGATGAAAGTTATACAGATCCAGGATGAGAAGACTGTTAGAA	2		0	-	NM_001025572	234	AAAACCAGTTCAGAGTGAAAATTCTGACAGTGACAGCAGTATGGTGGAGAGGCC	Ankrd12
SRR029642.12367356	+	7	1	5	GAGAGGTGCCTTTGTCTGGCGATGATGAAAGTTATACAGATCCAGGATGAGAAG	2		0	-	NM_001025572	234	AAAACCAGTTCAGAGTGAAAATTCTGACAGTGACAGCAGTATGGTGGAGAGGCC	Ankrd12
SRR029642.9437943	+	7	1	15	TTTGTCTGGCGATGATGAAAGTTATACAGATCCAGGATGAGAAGACTGTTAGAA	2		0	-	NM_001025572	229	TTCACAAAACCAGTTCAGAGTGAAAATTCTGACAGTGACAGCAGTATGGTGGAG	Ankrd12
SRR029642.9437943	+	7	1	15	TTTGTCTGGCGATGATGAAAGTTATACAGATCCAGGATGAGAAGACTGTTAGAA	2		0	-	NM_001025572	220	AAATCTGGGTTCACAAAACCAGTTCAGAGTGAAAATTCTGACAGTGACAGCAGT	Ankrd12
SRR029642.11200132	+	7	1	19	TCTGGCGATGATGAAAGTTATACAGATCCAGGATGAGAAGACTGTTAGAAGAAG	2		0	-	NM_001025572	220	AAATCTGGGTTCACAAAACCAGTTCAGAGTGAAAATTCTGACAGTGACAGCAGT	Ankrd12
SRR029642.4383455	+	7	1	9	GGTGCCTTTGTCTGGCGATGATGAAAGTTATACAGATCCAGGATGAGAAGACTG	2		0	-	NM_001025572	220	AAATCTGGGTTCACAAAACCAGTTCAGAGTGAAAATTCTGACAGTGACAGCAGT	Ankrd12
SRR029642.12367356	+	7	1	5	GAGAGGTGCCTTTGTCTGGCGATGATGAAAGTTATACAGATCCAGGATGAGAAG	2		0	-	NM_001025572	220	AAATCTGGGTTCACAAAACCAGTTCAGAGTGAAAATTCTGACAGTGACAGCAGT	Ankrd12
SRR029642.15235837	+	7	1	16	TTGTCTGGCGATGATGAAAGTTATACAGATCCCGGATGAGAAGACTGTTAGAAG	2	32:A>C	0	-	NM_001025572	220	AAATCTGGGTTCACAAAACCAGTTCAGAGTGAAAATTCTGACAGTGACAGCAGT	Ankrd12
SRR029642.15235837	+	7	1	16	TTGTCTGGCGATGATGAAAGTTATACAGATCCCGGATGAGAAGACTGTTAGAAG	2	32:A>C	0	-	NM_001025572	222	ATCTGGGTTCACAAAACCAGTTCAGAGTGAAAATTCTGACAGTGACAGCAGTAT	Ankrd12
SRR029642.11200132	+	7	1	19	TCTGGCGATGATGAAAGTTATACAGATCCAGGATGAGAAGACTGTTAGAAGAAG	2		0	-	NM_001025572	222	ATCTGGGTTCACAAAACCAGTTCAGAGTGAAAATTCTGACAGTGACAGCAGTAT	Ankrd12
SRR029642.12367356	+	7	1	5	GAGAGGTGCCTTTGTCTGGCGATGATGAAAGTTATACAGATCCAGGATGAGAAG	2		0	-	NM_001025572	229	TTCACAAAACCAGTTCAGAGTGAAAATTCTGACAGTGACAGCAGTATGGTGGAG	Ankrd12
SRR029642.11200132	+	7	1	19	TCTGGCGATGATGAAAGTTATACAGATCCAGGATGAGAAGACTGTTAGAAGAAG	2		0	-	NM_001025572	229	TTCACAAAACCAGTTCAGAGTGAAAATTCTGACAGTGACAGCAGTATGGTGGAG	Ankrd12
SRR029642.15235837	+	7	1	16	TTGTCTGGCGATGATGAAAGTTATACAGATCCCGGATGAGAAGACTGTTAGAAG	2	32:A>C	0	-	NM_001025572	234	AAAACCAGTTCAGAGTGAAAATTCTGACAGTGACAGCAGTATGGTGGAGAGGCC	Ankrd12
SRR029642.20445064	-	4	1	0	GATGGCACTCCTAATGCAGATGACAGCAAGGGACAACAGCCCAGATCCAGGATG	2		0	+	NM_001025572	518	AAAAAGAAGGTCCAGAGAAGAAGAAAACAAAAAAAGAAGCTGGAACTAAGAAGT	Ankrd12
SRR029642.4383455	+	7	1	9	GGTGCCTTTGTCTGGCGATGATGAAAGTTATACAGATCCAGGATGAGAAGACTG	2		0	-	NM_001025572	222	ATCTGGGTTCACAAAACCAGTTCAGAGTGAAAATTCTGACAGTGACAGCAGTAT	Ankrd12
SRR029642.9437943	+	7	1	15	TTTGTCTGGCGATGATGAAAGTTATACAGATCCAGGATGAGAAGACTGTTAGAA	2		0	-	NM_001025572	222	ATCTGGGTTCACAAAACCAGTTCAGAGTGAAAATTCTGACAGTGACAGCAGTAT	Ankrd12
SRR029642.12367356	+	7	1	5	GAGAGGTGCCTTTGTCTGGCGATGATGAAAGTTATACAGATCCAGGATGAGAAG	2		0	-	NM_001025572	226	GGGTTCACAAAACCAGTTCAGAGTGAAAATTCTGACAGTGACAGCAGTATGGTG	Ankrd12
SRR029642.4383455	+	7	1	9	GGTGCCTTTGTCTGGCGATGATGAAAGTTATACAGATCCAGGATGAGAAGACTG	2		0	-	NM_001025572	226	GGGTTCACAAAACCAGTTCAGAGTGAAAATTCTGACAGTGACAGCAGTATGGTG	Ankrd12
SRR029642.15235837	+	7	1	16	TTGTCTGGCGATGATGAAAGTTATACAGATCCCGGATGAGAAGACTGTTAGAAG	2	32:A>C	0	-	NM_001025572	229	TTCACAAAACCAGTTCAGAGTGAAAATTCTGACAGTGACAGCAGTATGGTGGAG	Ankrd12
SRR029642.11200132	+	7	1	19	TCTGGCGATGATGAAAGTTATACAGATCCAGGATGAGAAGACTGTTAGAAGAAG	2		0	-	NM_001025572	226	GGGTTCACAAAACCAGTTCAGAGTGAAAATTCTGACAGTGACAGCAGTATGGTG	Ankrd12
SRR029642.9437943	+	7	1	15	TTTGTCTGGCGATGATGAAAGTTATACAGATCCAGGATGAGAAGACTGTTAGAA	2		0	-	NM_001025572	226	GGGTTCACAAAACCAGTTCAGAGTGAAAATTCTGACAGTGACAGCAGTATGGTG	Ankrd12
SRR029642.4383455	+	7	1	9	GGTGCCTTTGTCTGGCGATGATGAAAGTTATACAGATCCAGGATGAGAAGACTG	2		0	-	NM_001025572	234	AAAACCAGTTCAGAGTGAAAATTCTGACAGTGACAGCAGTATGGTGGAGAGGCC	Ankrd12
SRR029642.4623845	+	1	1	27	TGGAGACAGACAGATGAGAAACACTCCTTTACATCTTGCTGTGATGTTAGGAAA	2		1	-	NM_001013806	567	AGTAAAGGTGAAAAATGCTCAGGGATGGAGCCCTCTGGCGGAAGCCATCAGCTA	Ankrd13c
SRR029642.5064428	-	14	1	18	AAGTTATATTTCCCTTTCCTGTGATGATGGAAGATAGTGCCACAAAACATATCA	2		0	+	NM_134071	1951	ATCTTACTTACTGACTGGAATTCTTGGTGCAGCAGTAGATTACTGGATCTTCCT	Ankrd32
SRR029642.11818046	+	3	2	4	GCTGACCCCACTGCACCGGGCTGTTGCTTCCAGAAGTGAAGATTCTGAGAAACG	2		0	-	NM_001081433	383	GAGATCATTGAACTCCTGATTTTGTCAGGAGCTCGTGTAAATGCCAAGGACAAC	Ankrd44
SRR029642.18022686	+	23	23	16	GCTGAGAGTGGACAGACTGCTGCTGTGGGACTCCCCCTCACGCCGCTGCCTTCG	2	36:T>C	0	-	NM_172790	2739	CAAGCCGAAGTGAATGCCACCGACCACACTGGCCGCACTGCGCTCATGACGGCC	Ankrd52
SRR029642.7099722	-	7	4	10	GGAAGAGCTTGGGAAAAATGGAAGCCAGAGTGTAACAGAAAAGGGGAGTGCTCT	2		0	+	NM_001128086	1175	GCCAAGAAAAGGACTATTCCTTTGAAGATCTGTGCCATACGATCTCAGACCACT	Anks1b
SRR029642.14904200	+	9	5	21	ACGTGTTTACTGCCTTTGATGTGTCGTCTGTCTGTGAAATCTGGACCAATCAGA	2		0	-	NM_001177396	1097	CGATCCATCAGGTTCATAATACAGGGGACTGGGGAGAACCTTCCATCACCTTGC	Anks1b
SRR029642.18811776	-	7	4	19	GGGGAAAAATGGAAGCCAGAGTGTAACAGAAAAGGGGAGTGCTCTTCACGAAGC	2	53:T>G	0	+	NM_001128086	1167	AAAACTCTGCCAAGAAAAGGACTATTCCTTTGAAGATCTGTGCCATACGATCTC	Anks1b
SRR029642.20192920	-	7	4	19	GGGGAAAAATGGAAGCCAGAGTGTAATAGAAAAGGGGAGTGCTCTTCACGAAGC	2	27:C>T,53:T>G	0	+	NM_001128086	1158	GGATGAAATAAAACTCTGCCAAGAAAAGGACTATTCCTTTGAAGATCTGTGCCA	Anks1b
SRR029642.18583148	-	8	4	13	GAGGAACCTTGGCTTTCCCATGCTCGCACAGACAGAAAAGGGGAGTGCTCTTCA	2	53:T>G	0	+	NM_001128086	1167	AAAACTCTGCCAAGAAAAGGACTATTCCTTTGAAGATCTGTGCCATACGATCTC	Anks1b
SRR029642.3769940	-	7	4	13	AGAGCTTGGGAAAAATGGAAGCCAGAGTGTAACAGAAAAGGGGAGTGCTCTTCA	2		0	+	NM_001128086	1169	AACTCTGCCAAGAAAAGGACTATTCCTTTGAAGATCTGTGCCATACGATCTCAG	Anks1b
SRR029642.18480892	-	8	4	14	AGGAACCTTGGCTTTCCCATGCTCGCACAGACAGAAAAGGGGAGTGCTCTTCAC	2		0	+	NM_001128086	1167	AAAACTCTGCCAAGAAAAGGACTATTCCTTTGAAGATCTGTGCCATACGATCTC	Anks1b
SRR029642.1278040	+	7	3	6	CAGAGGAAGAGCTTGGGAAAAATGGAAGCCAGAGTGTAAACAACGAGAACGAAA	2		0	-	NM_001128086	609	GGAACTCACGGACCCCACGATTAGGAACAGCAAACTCGAAACACCGCTGGACTT	Anks1b
SRR029642.14588765	-	8	4	14	AGGGACCTTGGCTTTCCCATGCTCGCACAGACAGAAAAGGGGAGTGCTCTTCAC	2	50:A>G	0	+	NM_001128086	1167	AAAACTCTGCCAAGAAAAGGACTATTCCTTTGAAGATCTGTGCCATACGATCTC	Anks1b
SRR029642.10529787	+	11	3	22	AACGAGGGAGCTGAACACGCAGAACAACGAGAACGAAACCGCCCTCCACTGTGC	2		0	-	NM_001128086	609	GGAACTCACGGACCCCACGATTAGGAACAGCAAACTCGAAACACCGCTGGACTT	Anks1b
SRR029642.14218026	-	7	4	15	AGCTTGGGAAAAATGGAAGCCAGAGTGTAACAGAAAAGGGGAGTGCTCTTCACG	2		0	+	NM_001128086	1167	AAAACTCTGCCAAGAAAAGGACTATTCCTTTGAAGATCTGTGCCATACGATCTC	Anks1b
SRR029642.12679327	-	7	4	24	AAAAGGGAAGCCAGAGTGTAACAGAAAAGGGGAGTGCTCTTCACGAAGCGGCTT	2	49:T>G	0	+	NM_001128086	1169	AACTCTGCCAAGAAAAGGACTATTCCTTTGAAGATCTGTGCCATACGATCTCAG	Anks1b
SRR029642.12679327	-	7	4	24	AAAAGGGAAGCCAGAGTGTAACAGAAAAGGGGAGTGCTCTTCACGAAGCGGCTT	2	49:T>G	0	+	NM_001128086	1167	AAAACTCTGCCAAGAAAAGGACTATTCCTTTGAAGATCTGTGCCATACGATCTC	Anks1b
SRR029642.7099722	-	7	4	10	GGAAGAGCTTGGGAAAAATGGAAGCCAGAGTGTAACAGAAAAGGGGAGTGCTCT	2		0	+	NM_001128086	1169	AACTCTGCCAAGAAAAGGACTATTCCTTTGAAGATCTGTGCCATACGATCTCAG	Anks1b
SRR029642.9248342	-	7	4	14	GAGCTTGGGAAAAAGGGAAGCCAGAGTGTAACAGAAAAGGGGAGTGCTCTTCAC	2	39:T>G	0	+	NM_001128086	1167	AAAACTCTGCCAAGAAAAGGACTATTCCTTTGAAGATCTGTGCCATACGATCTC	Anks1b
SRR029642.9248342	-	7	4	14	GAGCTTGGGAAAAAGGGAAGCCAGAGTGTAACAGAAAAGGGGAGTGCTCTTCAC	2	39:T>G	0	+	NM_001128086	1169	AACTCTGCCAAGAAAAGGACTATTCCTTTGAAGATCTGTGCCATACGATCTCAG	Anks1b
SRR029642.7099722	-	7	4	10	GGAAGAGCTTGGGAAAAATGGAAGCCAGAGTGTAACAGAAAAGGGGAGTGCTCT	2		0	+	NM_001128086	1167	AAAACTCTGCCAAGAAAAGGACTATTCCTTTGAAGATCTGTGCCATACGATCTC	Anks1b
SRR029642.20192920	-	7	4	19	GGGGAAAAATGGAAGCCAGAGTGTAATAGAAAAGGGGAGTGCTCTTCACGAAGC	2	27:C>T,53:T>G	0	+	NM_001128086	1169	AACTCTGCCAAGAAAAGGACTATTCCTTTGAAGATCTGTGCCATACGATCTCAG	Anks1b
SRR029642.4899929	-	7	4	24	AAAAGGGAAGCCAGAGTGTAACAGAAAAGGGGAGTGCTCTTCACGAAGCGGCTT	2	49:T>G	0	+	NM_001128086	1167	AAAACTCTGCCAAGAAAAGGACTATTCCTTTGAAGATCTGTGCCATACGATCTC	Anks1b
SRR029642.14218026	-	7	4	15	AGCTTGGGAAAAATGGAAGCCAGAGTGTAACAGAAAAGGGGAGTGCTCTTCACG	2		0	+	NM_001128086	1169	AACTCTGCCAAGAAAAGGACTATTCCTTTGAAGATCTGTGCCATACGATCTCAG	Anks1b
SRR029642.12679327	-	7	4	24	AAAAGGGAAGCCAGAGTGTAACAGAAAAGGGGAGTGCTCTTCACGAAGCGGCTT	2	49:T>G	0	+	NM_001128086	1175	GCCAAGAAAAGGACTATTCCTTTGAAGATCTGTGCCATACGATCTCAGACCACT	Anks1b
SRR029642.14588765	-	8	4	14	AGGGACCTTGGCTTTCCCATGCTCGCACAGACAGAAAAGGGGAGTGCTCTTCAC	2	50:A>G	0	+	NM_001128086	1169	AACTCTGCCAAGAAAAGGACTATTCCTTTGAAGATCTGTGCCATACGATCTCAG	Anks1b
SRR029642.3769940	-	7	4	13	AGAGCTTGGGAAAAATGGAAGCCAGAGTGTAACAGAAAAGGGGAGTGCTCTTCA	2		0	+	NM_001128086	1167	AAAACTCTGCCAAGAAAAGGACTATTCCTTTGAAGATCTGTGCCATACGATCTC	Anks1b
SRR029642.18842366	-	7	2	15	AGCTTGGGAAAAATGGAAGCCAGAGTGTAGGACATAGTTCTCAAACTGCTGCAG	2		0	+	NM_001128086	1169	AACTCTGCCAAGAAAAGGACTATTCCTTTGAAGATCTGTGCCATACGATCTCAG	Anks1b
SRR029642.1292148	-	7	4	15	AGCTTGGGAAAAATGGAAGCCAGAGTGTAACAGAAAAGGGGAGTGCTCTTCACG	2		0	+	NM_001128086	1167	AAAACTCTGCCAAGAAAAGGACTATTCCTTTGAAGATCTGTGCCATACGATCTC	Anks1b
SRR029642.18480892	-	8	4	14	AGGAACCTTGGCTTTCCCATGCTCGCACAGACAGAAAAGGGGAGTGCTCTTCAC	2		0	+	NM_001128086	1169	AACTCTGCCAAGAAAAGGACTATTCCTTTGAAGATCTGTGCCATACGATCTCAG	Anks1b
SRR029642.20784251	-	7	4	16	GCGTGGGAAAAATGGAAGCCAGAGTGTAACAGAAAAGGGGAGTGCTCTTCACGA	2	51:T>G	0	+	NM_001128086	1167	AAAACTCTGCCAAGAAAAGGACTATTCCTTTGAAGATCTGTGCCATACGATCTC	Anks1b
SRR029642.20784251	-	7	4	16	GCGTGGGAAAAATGGAAGCCAGAGTGTAACAGAAAAGGGGAGTGCTCTTCACGA	2	51:T>G	0	+	NM_001128086	1158	GGATGAAATAAAACTCTGCCAAGAAAAGGACTATTCCTTTGAAGATCTGTGCCA	Anks1b
SRR029642.20192920	-	7	4	19	GGGGAAAAATGGAAGCCAGAGTGTAATAGAAAAGGGGAGTGCTCTTCACGAAGC	2	27:C>T,53:T>G	0	+	NM_001128086	1167	AAAACTCTGCCAAGAAAAGGACTATTCCTTTGAAGATCTGTGCCATACGATCTC	Anks1b
SRR029642.4899929	-	7	4	24	AAAAGGGAAGCCAGAGTGTAACAGAAAAGGGGAGTGCTCTTCACGAAGCGGCTT	2	49:T>G	0	+	NM_001128086	1169	AACTCTGCCAAGAAAAGGACTATTCCTTTGAAGATCTGTGCCATACGATCTCAG	Anks1b
SRR029642.18842366	-	7	2	15	AGCTTGGGAAAAATGGAAGCCAGAGTGTAGGACATAGTTCTCAAACTGCTGCAG	2		0	+	NM_001128086	1167	AAAACTCTGCCAAGAAAAGGACTATTCCTTTGAAGATCTGTGCCATACGATCTC	Anks1b
SRR029642.18842366	-	7	2	15	AGCTTGGGAAAAATGGAAGCCAGAGTGTAGGACATAGTTCTCAAACTGCTGCAG	2		0	+	NM_001128086	1305	AATAAATTTGTCACCAGGAGAAGTGGAAGACGAAGAGGAGGATCCAAACTCTTG	Anks1b
SRR029642.18811776	-	7	4	19	GGGGAAAAATGGAAGCCAGAGTGTAACAGAAAAGGGGAGTGCTCTTCACGAAGC	2	53:T>G	0	+	NM_001128086	1167	AAAACTCTGCCAAGAAAAGGACTATTCCTTTGAAGATCTGTGCCATACGATCTC	Anks1b
SRR029642.18480892	-	8	4	14	AGGAACCTTGGCTTTCCCATGCTCGCACAGACAGAAAAGGGGAGTGCTCTTCAC	2		0	+	NM_001128086	1305	AATAAATTTGTCACCAGGAGAAGTGGAAGACGAAGAGGAGGATCCAAACTCTTG	Anks1b
SRR029642.18583148	-	8	4	13	GAGGAACCTTGGCTTTCCCATGCTCGCACAGACAGAAAAGGGGAGTGCTCTTCA	2	53:T>G	0	+	NM_001128086	1167	AAAACTCTGCCAAGAAAAGGACTATTCCTTTGAAGATCTGTGCCATACGATCTC	Anks1b
SRR029642.18583148	-	8	4	13	GAGGAACCTTGGCTTTCCCATGCTCGCACAGACAGAAAAGGGGAGTGCTCTTCA	2	53:T>G	0	+	NM_001128086	1305	AATAAATTTGTCACCAGGAGAAGTGGAAGACGAAGAGGAGGATCCAAACTCTTG	Anks1b
SRR029642.18480892	-	8	4	14	AGGAACCTTGGCTTTCCCATGCTCGCACAGACAGAAAAGGGGAGTGCTCTTCAC	2		0	+	NM_001128086	1167	AAAACTCTGCCAAGAAAAGGACTATTCCTTTGAAGATCTGTGCCATACGATCTC	Anks1b
SRR029642.18811776	-	7	4	19	GGGGAAAAATGGAAGCCAGAGTGTAACAGAAAAGGGGAGTGCTCTTCACGAAGC	2	53:T>G	0	+	NM_001128086	1305	AATAAATTTGTCACCAGGAGAAGTGGAAGACGAAGAGGAGGATCCAAACTCTTG	Anks1b
SRR029642.14588765	-	8	4	14	AGGGACCTTGGCTTTCCCATGCTCGCACAGACAGAAAAGGGGAGTGCTCTTCAC	2	50:A>G	0	+	NM_001128086	1167	AAAACTCTGCCAAGAAAAGGACTATTCCTTTGAAGATCTGTGCCATACGATCTC	Anks1b
SRR029642.1292148	-	7	4	15	AGCTTGGGAAAAATGGAAGCCAGAGTGTAACAGAAAAGGGGAGTGCTCTTCACG	2		0	+	NM_001128086	1169	AACTCTGCCAAGAAAAGGACTATTCCTTTGAAGATCTGTGCCATACGATCTCAG	Anks1b
SRR029642.14218026	-	7	4	15	AGCTTGGGAAAAATGGAAGCCAGAGTGTAACAGAAAAGGGGAGTGCTCTTCACG	2		0	+	NM_001128086	1167	AAAACTCTGCCAAGAAAAGGACTATTCCTTTGAAGATCTGTGCCATACGATCTC	Anks1b
SRR029642.14218026	-	7	4	15	AGCTTGGGAAAAATGGAAGCCAGAGTGTAACAGAAAAGGGGAGTGCTCTTCACG	2		0	+	NM_001128086	1305	AATAAATTTGTCACCAGGAGAAGTGGAAGACGAAGAGGAGGATCCAAACTCTTG	Anks1b
SRR029642.12679327	-	7	4	24	AAAAGGGAAGCCAGAGTGTAACAGAAAAGGGGAGTGCTCTTCACGAAGCGGCTT	2	49:T>G	0	+	NM_001128086	1167	AAAACTCTGCCAAGAAAAGGACTATTCCTTTGAAGATCTGTGCCATACGATCTC	Anks1b
SRR029642.14588765	-	8	4	14	AGGGACCTTGGCTTTCCCATGCTCGCACAGACAGAAAAGGGGAGTGCTCTTCAC	2	50:A>G	0	+	NM_001128086	1305	AATAAATTTGTCACCAGGAGAAGTGGAAGACGAAGAGGAGGATCCAAACTCTTG	Anks1b
SRR029642.9248342	-	7	4	14	GAGCTTGGGAAAAAGGGAAGCCAGAGTGTAACAGAAAAGGGGAGTGCTCTTCAC	2	39:T>G	0	+	NM_001128086	1167	AAAACTCTGCCAAGAAAAGGACTATTCCTTTGAAGATCTGTGCCATACGATCTC	Anks1b
SRR029642.10529787	+	11	3	22	AACGAGGGAGCTGAACACGCAGAACAACGAGAACGAAACCGCCCTCCACTGTGC	2		1	-	NM_001128086	613	CTCACGGACTCCACGATTAGGAACAGCAAACTCGAAACACCGCTGGACTTGGCA	Anks1b
SRR029642.7099722	-	7	4	10	GGAAGAGCTTGGGAAAAATGGAAGCCAGAGTGTAACAGAAAAGGGGAGTGCTCT	2		0	+	NM_001128086	1167	AAAACTCTGCCAAGAAAAGGACTATTCCTTTGAAGATCTGTGCCATACGATCTC	Anks1b
SRR029642.7099722	-	7	4	10	GGAAGAGCTTGGGAAAAATGGAAGCCAGAGTGTAACAGAAAAGGGGAGTGCTCT	2		0	+	NM_001128086	1305	AATAAATTTGTCACCAGGAGAAGTGGAAGACGAAGAGGAGGATCCAAACTCTTG	Anks1b
SRR029642.4899929	-	7	4	24	AAAAGGGAAGCCAGAGTGTAACAGAAAAGGGGAGTGCTCTTCACGAAGCGGCTT	2	49:T>G	0	+	NM_001128086	1167	AAAACTCTGCCAAGAAAAGGACTATTCCTTTGAAGATCTGTGCCATACGATCTC	Anks1b
SRR029642.9248342	-	7	4	14	GAGCTTGGGAAAAAGGGAAGCCAGAGTGTAACAGAAAAGGGGAGTGCTCTTCAC	2	39:T>G	0	+	NM_001128086	1305	AATAAATTTGTCACCAGGAGAAGTGGAAGACGAAGAGGAGGATCCAAACTCTTG	Anks1b
SRR029642.3769940	-	7	4	13	AGAGCTTGGGAAAAATGGAAGCCAGAGTGTAACAGAAAAGGGGAGTGCTCTTCA	2		0	+	NM_001128086	1167	AAAACTCTGCCAAGAAAAGGACTATTCCTTTGAAGATCTGTGCCATACGATCTC	Anks1b
SRR029642.1292148	-	7	4	15	AGCTTGGGAAAAATGGAAGCCAGAGTGTAACAGAAAAGGGGAGTGCTCTTCACG	2		0	+	NM_001128086	1305	AATAAATTTGTCACCAGGAGAAGTGGAAGACGAAGAGGAGGATCCAAACTCTTG	Anks1b
SRR029642.1292148	-	7	4	15	AGCTTGGGAAAAATGGAAGCCAGAGTGTAACAGAAAAGGGGAGTGCTCTTCACG	2		0	+	NM_001128086	1167	AAAACTCTGCCAAGAAAAGGACTATTCCTTTGAAGATCTGTGCCATACGATCTC	Anks1b
SRR029642.4899929	-	7	4	24	AAAAGGGAAGCCAGAGTGTAACAGAAAAGGGGAGTGCTCTTCACGAAGCGGCTT	2	49:T>G	0	+	NM_001128086	1305	AATAAATTTGTCACCAGGAGAAGTGGAAGACGAAGAGGAGGATCCAAACTCTTG	Anks1b
SRR029642.20784251	-	7	4	16	GCGTGGGAAAAATGGAAGCCAGAGTGTAACAGAAAAGGGGAGTGCTCTTCACGA	2	51:T>G	0	+	NM_001128086	1153	CTCCTGGATGAAATAAAACTCTGCCAAGAAAAGGACTATTCCTTTGAAGATCTG	Anks1b
SRR029642.8185299	+	7	3	28	TGGAAGCCAGAGTGTAAACAACGAGAACGAAACCGCCCTCCACTGTGCAGCGCA	2		0	-	NM_001128086	446	CCATTCACCTGGCTGCCTGGAAAGGAGACGTGGAGATTGTGAAGATCCTCATCC	Anks1b
SRR029642.20192920	-	7	4	19	GGGGAAAAATGGAAGCCAGAGTGTAATAGAAAAGGGGAGTGCTCTTCACGAAGC	2	27:C>T,53:T>G	0	+	NM_001128086	1153	CTCCTGGATGAAATAAAACTCTGCCAAGAAAAGGACTATTCCTTTGAAGATCTG	Anks1b
SRR029642.4147227	+	7	4	26	AATGGAAGCCAGAGTGTAACAGAAAAGGGGAGTGCTCTTCACGAAGCGGCTTTG	2		0	-	NM_001128086	609	GGAACTCACGGACCCCACGATTAGGAACAGCAAACTCGAAACACCGCTGGACTT	Anks1b
SRR029642.18842366	-	7	2	15	AGCTTGGGAAAAATGGAAGCCAGAGTGTAGGACATAGTTCTCAAACTGCTGCAG	2		0	+	NM_001128086	1153	CTCCTGGATGAAATAAAACTCTGCCAAGAAAAGGACTATTCCTTTGAAGATCTG	Anks1b
SRR029642.18842366	-	7	2	15	AGCTTGGGAAAAATGGAAGCCAGAGTGTAGGACATAGTTCTCAAACTGCTGCAG	2		0	+	NM_001128086	1158	GGATGAAATAAAACTCTGCCAAGAAAAGGACTATTCCTTTGAAGATCTGTGCCA	Anks1b
SRR029642.18811776	-	7	4	19	GGGGAAAAATGGAAGCCAGAGTGTAACAGAAAAGGGGAGTGCTCTTCACGAAGC	2	53:T>G	0	+	NM_001128086	1153	CTCCTGGATGAAATAAAACTCTGCCAAGAAAAGGACTATTCCTTTGAAGATCTG	Anks1b
SRR029642.18811776	-	7	4	19	GGGGAAAAATGGAAGCCAGAGTGTAACAGAAAAGGGGAGTGCTCTTCACGAAGC	2	53:T>G	0	+	NM_001128086	1158	GGATGAAATAAAACTCTGCCAAGAAAAGGACTATTCCTTTGAAGATCTGTGCCA	Anks1b
SRR029642.18583148	-	8	4	13	GAGGAACCTTGGCTTTCCCATGCTCGCACAGACAGAAAAGGGGAGTGCTCTTCA	2	53:T>G	0	+	NM_001128086	1153	CTCCTGGATGAAATAAAACTCTGCCAAGAAAAGGACTATTCCTTTGAAGATCTG	Anks1b
SRR029642.5632641	+	7	2	7	AGAGGAAGAGCTTGGGAAAAATGGAAGCCAGAGTGTAGGACATAGTTCTCCAAC	2	50:A>C	0	-	NM_001128086	609	GGAACTCACGGACCCCACGATTAGGAACAGCAAACTCGAAACACCGCTGGACTT	Anks1b
SRR029642.18480892	-	8	4	14	AGGAACCTTGGCTTTCCCATGCTCGCACAGACAGAAAAGGGGAGTGCTCTTCAC	2		0	+	NM_001128086	1153	CTCCTGGATGAAATAAAACTCTGCCAAGAAAAGGACTATTCCTTTGAAGATCTG	Anks1b
SRR029642.20192920	-	7	4	19	GGGGAAAAATGGAAGCCAGAGTGTAATAGAAAAGGGGAGTGCTCTTCACGAAGC	2	27:C>T,53:T>G	0	+	NM_001128086	1305	AATAAATTTGTCACCAGGAGAAGTGGAAGACGAAGAGGAGGATCCAAACTCTTG	Anks1b
SRR029642.14588765	-	8	4	14	AGGGACCTTGGCTTTCCCATGCTCGCACAGACAGAAAAGGGGAGTGCTCTTCAC	2	50:A>G	0	+	NM_001128086	1153	CTCCTGGATGAAATAAAACTCTGCCAAGAAAAGGACTATTCCTTTGAAGATCTG	Anks1b
SRR029642.20784251	-	7	4	16	GCGTGGGAAAAATGGAAGCCAGAGTGTAACAGAAAAGGGGAGTGCTCTTCACGA	2	51:T>G	0	+	NM_001128086	1169	AACTCTGCCAAGAAAAGGACTATTCCTTTGAAGATCTGTGCCATACGATCTCAG	Anks1b
SRR029642.14218026	-	7	4	15	AGCTTGGGAAAAATGGAAGCCAGAGTGTAACAGAAAAGGGGAGTGCTCTTCACG	2		0	+	NM_001128086	1153	CTCCTGGATGAAATAAAACTCTGCCAAGAAAAGGACTATTCCTTTGAAGATCTG	Anks1b
SRR029642.20784251	-	7	4	16	GCGTGGGAAAAATGGAAGCCAGAGTGTAACAGAAAAGGGGAGTGCTCTTCACGA	2	51:T>G	0	+	NM_001128086	1305	AATAAATTTGTCACCAGGAGAAGTGGAAGACGAAGAGGAGGATCCAAACTCTTG	Anks1b
SRR029642.12679327	-	7	4	24	AAAAGGGAAGCCAGAGTGTAACAGAAAAGGGGAGTGCTCTTCACGAAGCGGCTT	2	49:T>G	0	+	NM_001128086	1153	CTCCTGGATGAAATAAAACTCTGCCAAGAAAAGGACTATTCCTTTGAAGATCTG	Anks1b
SRR029642.14588765	-	8	4	14	AGGGACCTTGGCTTTCCCATGCTCGCACAGACAGAAAAGGGGAGTGCTCTTCAC	2	50:A>G	0	+	NM_001128086	1305	AATAAATTTGTCACCAGGAGAAGTGGAAGACGAAGAGGAGGATCCAAACTCTTG	Anks1b
SRR029642.18842366	-	7	2	15	AGCTTGGGAAAAATGGAAGCCAGAGTGTAGGACATAGTTCTCAAACTGCTGCAG	2		0	+	NM_001128086	1175	GCCAAGAAAAGGACTATTCCTTTGAAGATCTGTGCCATACGATCTCAGACCACT	Anks1b
SRR029642.18842366	-	7	2	15	AGCTTGGGAAAAATGGAAGCCAGAGTGTAGGACATAGTTCTCAAACTGCTGCAG	2		0	+	NM_001128086	1305	AATAAATTTGTCACCAGGAGAAGTGGAAGACGAAGAGGAGGATCCAAACTCTTG	Anks1b
SRR029642.9248342	-	7	4	14	GAGCTTGGGAAAAAGGGAAGCCAGAGTGTAACAGAAAAGGGGAGTGCTCTTCAC	2	39:T>G	0	+	NM_001128086	1153	CTCCTGGATGAAATAAAACTCTGCCAAGAAAAGGACTATTCCTTTGAAGATCTG	Anks1b
SRR029642.18480892	-	8	4	14	AGGAACCTTGGCTTTCCCATGCTCGCACAGACAGAAAAGGGGAGTGCTCTTCAC	2		0	+	NM_001128086	1305	AATAAATTTGTCACCAGGAGAAGTGGAAGACGAAGAGGAGGATCCAAACTCTTG	Anks1b
SRR029642.7099722	-	7	4	10	GGAAGAGCTTGGGAAAAATGGAAGCCAGAGTGTAACAGAAAAGGGGAGTGCTCT	2		0	+	NM_001128086	1153	CTCCTGGATGAAATAAAACTCTGCCAAGAAAAGGACTATTCCTTTGAAGATCTG	Anks1b
SRR029642.18583148	-	8	4	13	GAGGAACCTTGGCTTTCCCATGCTCGCACAGACAGAAAAGGGGAGTGCTCTTCA	2	53:T>G	0	+	NM_001128086	1305	AATAAATTTGTCACCAGGAGAAGTGGAAGACGAAGAGGAGGATCCAAACTCTTG	Anks1b
SRR029642.4899929	-	7	4	24	AAAAGGGAAGCCAGAGTGTAACAGAAAAGGGGAGTGCTCTTCACGAAGCGGCTT	2	49:T>G	0	+	NM_001128086	1153	CTCCTGGATGAAATAAAACTCTGCCAAGAAAAGGACTATTCCTTTGAAGATCTG	Anks1b
SRR029642.18811776	-	7	4	19	GGGGAAAAATGGAAGCCAGAGTGTAACAGAAAAGGGGAGTGCTCTTCACGAAGC	2	53:T>G	0	+	NM_001128086	1305	AATAAATTTGTCACCAGGAGAAGTGGAAGACGAAGAGGAGGATCCAAACTCTTG	Anks1b
SRR029642.3769940	-	7	4	13	AGAGCTTGGGAAAAATGGAAGCCAGAGTGTAACAGAAAAGGGGAGTGCTCTTCA	2		0	+	NM_001128086	1153	CTCCTGGATGAAATAAAACTCTGCCAAGAAAAGGACTATTCCTTTGAAGATCTG	Anks1b
SRR029642.14218026	-	7	4	15	AGCTTGGGAAAAATGGAAGCCAGAGTGTAACAGAAAAGGGGAGTGCTCTTCACG	2		0	+	NM_001128086	1305	AATAAATTTGTCACCAGGAGAAGTGGAAGACGAAGAGGAGGATCCAAACTCTTG	Anks1b
SRR029642.1292148	-	7	4	15	AGCTTGGGAAAAATGGAAGCCAGAGTGTAACAGAAAAGGGGAGTGCTCTTCACG	2		0	+	NM_001128086	1153	CTCCTGGATGAAATAAAACTCTGCCAAGAAAAGGACTATTCCTTTGAAGATCTG	Anks1b
SRR029642.9248342	-	7	4	14	GAGCTTGGGAAAAAGGGAAGCCAGAGTGTAACAGAAAAGGGGAGTGCTCTTCAC	2	39:T>G	0	+	NM_001128086	1305	AATAAATTTGTCACCAGGAGAAGTGGAAGACGAAGAGGAGGATCCAAACTCTTG	Anks1b
SRR029642.18842366	-	7	2	15	AGCTTGGGAAAAATGGAAGCCAGAGTGTAGGACATAGTTCTCAAACTGCTGCAG	2		0	+	NM_001128086	1167	AAAACTCTGCCAAGAAAAGGACTATTCCTTTGAAGATCTGTGCCATACGATCTC	Anks1b
SRR029642.12679327	-	7	4	24	AAAAGGGAAGCCAGAGTGTAACAGAAAAGGGGAGTGCTCTTCACGAAGCGGCTT	2	49:T>G	0	+	NM_001128086	1305	AATAAATTTGTCACCAGGAGAAGTGGAAGACGAAGAGGAGGATCCAAACTCTTG	Anks1b
SRR029642.20192920	-	7	4	19	GGGGAAAAATGGAAGCCAGAGTGTAATAGAAAAGGGGAGTGCTCTTCACGAAGC	2	27:C>T,53:T>G	0	+	NM_001128086	1168	AAACTCTGCCAAGAAAAGGACTATTCCTTTGAAGATCTGTGCCATACGATCTCA	Anks1b
SRR029642.4899929	-	7	4	24	AAAAGGGAAGCCAGAGTGTAACAGAAAAGGGGAGTGCTCTTCACGAAGCGGCTT	2	49:T>G	0	+	NM_001128086	1305	AATAAATTTGTCACCAGGAGAAGTGGAAGACGAAGAGGAGGATCCAAACTCTTG	Anks1b
SRR029642.18842366	-	7	2	15	AGCTTGGGAAAAATGGAAGCCAGAGTGTAGGACATAGTTCTCAAACTGCTGCAG	2		0	+	NM_001128086	1168	AAACTCTGCCAAGAAAAGGACTATTCCTTTGAAGATCTGTGCCATACGATCTCA	Anks1b
SRR029642.1278040	+	7	3	6	CAGAGGAAGAGCTTGGGAAAAATGGAAGCCAGAGTGTAAACAACGAGAACGAAA	2		0	-	NM_001128086	921	CATAAAGGACAGTTTAGGTAGAACTGTCTTAGACATTCTAAAAGAGCACCCGTC	Anks1b
SRR029642.18811776	-	7	4	19	GGGGAAAAATGGAAGCCAGAGTGTAACAGAAAAGGGGAGTGCTCTTCACGAAGC	2	53:T>G	0	+	NM_001128086	1168	AAACTCTGCCAAGAAAAGGACTATTCCTTTGAAGATCTGTGCCATACGATCTCA	Anks1b
SRR029642.7099722	-	7	4	10	GGAAGAGCTTGGGAAAAATGGAAGCCAGAGTGTAACAGAAAAGGGGAGTGCTCT	2		0	+	NM_001128086	1305	AATAAATTTGTCACCAGGAGAAGTGGAAGACGAAGAGGAGGATCCAAACTCTTG	Anks1b
SRR029642.18583148	-	8	4	13	GAGGAACCTTGGCTTTCCCATGCTCGCACAGACAGAAAAGGGGAGTGCTCTTCA	2	53:T>G	0	+	NM_001128086	1168	AAACTCTGCCAAGAAAAGGACTATTCCTTTGAAGATCTGTGCCATACGATCTCA	Anks1b
SRR029642.1292148	-	7	4	15	AGCTTGGGAAAAATGGAAGCCAGAGTGTAACAGAAAAGGGGAGTGCTCTTCACG	2		0	+	NM_001128086	1305	AATAAATTTGTCACCAGGAGAAGTGGAAGACGAAGAGGAGGATCCAAACTCTTG	Anks1b
SRR029642.18480892	-	8	4	14	AGGAACCTTGGCTTTCCCATGCTCGCACAGACAGAAAAGGGGAGTGCTCTTCAC	2		0	+	NM_001128086	1168	AAACTCTGCCAAGAAAAGGACTATTCCTTTGAAGATCTGTGCCATACGATCTCA	Anks1b
SRR029642.3769940	-	7	4	13	AGAGCTTGGGAAAAATGGAAGCCAGAGTGTAACAGAAAAGGGGAGTGCTCTTCA	2		0	+	NM_001128086	1305	AATAAATTTGTCACCAGGAGAAGTGGAAGACGAAGAGGAGGATCCAAACTCTTG	Anks1b
SRR029642.14588765	-	8	4	14	AGGGACCTTGGCTTTCCCATGCTCGCACAGACAGAAAAGGGGAGTGCTCTTCAC	2	50:A>G	0	+	NM_001128086	1168	AAACTCTGCCAAGAAAAGGACTATTCCTTTGAAGATCTGTGCCATACGATCTCA	Anks1b
SRR029642.14904200	+	9	5	21	ACGTGTTTACTGCCTTTGATGTGTCGTCTGTCTGTGAAATCTGGACCAATCAGA	2		0	-	NM_001177396	1102	CATCAGGTTCATAATACAGGGGACTGGGGAGAACCTTCCATCACCTTGCGACCT	Anks1b
SRR029642.14218026	-	7	4	15	AGCTTGGGAAAAATGGAAGCCAGAGTGTAACAGAAAAGGGGAGTGCTCTTCACG	2		0	+	NM_001128086	1168	AAACTCTGCCAAGAAAAGGACTATTCCTTTGAAGATCTGTGCCATACGATCTCA	Anks1b
SRR029642.4402938	+	9	5	0	AGTCCAACCACCACTACTGTCACGTGTTTACTGCCTTTGATGTGTCGTCTGTCT	2		0	-	NM_001177396	1102	CATCAGGTTCATAATACAGGGGACTGGGGAGAACCTTCCATCACCTTGCGACCT	Anks1b
SRR029642.12679327	-	7	4	24	AAAAGGGAAGCCAGAGTGTAACAGAAAAGGGGAGTGCTCTTCACGAAGCGGCTT	2	49:T>G	0	+	NM_001128086	1168	AAACTCTGCCAAGAAAAGGACTATTCCTTTGAAGATCTGTGCCATACGATCTCA	Anks1b
SRR029642.4147227	+	7	4	26	AATGGAAGCCAGAGTGTAACAGAAAAGGGGAGTGCTCTTCACGAAGCGGCTTTG	2		0	-	NM_001128086	921	CATAAAGGACAGTTTAGGTAGAACTGTCTTAGACATTCTAAAAGAGCACCCGTC	Anks1b
SRR029642.9248342	-	7	4	14	GAGCTTGGGAAAAAGGGAAGCCAGAGTGTAACAGAAAAGGGGAGTGCTCTTCAC	2	39:T>G	0	+	NM_001128086	1168	AAACTCTGCCAAGAAAAGGACTATTCCTTTGAAGATCTGTGCCATACGATCTCA	Anks1b
SRR029642.4147227	+	7	4	26	AATGGAAGCCAGAGTGTAACAGAAAAGGGGAGTGCTCTTCACGAAGCGGCTTTG	2		0	-	NM_001128086	601	CTCCTAGAGGAACTCACGGACCCCACGATTAGGAACAGCAAACTCGAAACACCG	Anks1b
SRR029642.7099722	-	7	4	10	GGAAGAGCTTGGGAAAAATGGAAGCCAGAGTGTAACAGAAAAGGGGAGTGCTCT	2		0	+	NM_001128086	1168	AAACTCTGCCAAGAAAAGGACTATTCCTTTGAAGATCTGTGCCATACGATCTCA	Anks1b
SRR029642.5632641	+	7	2	7	AGAGGAAGAGCTTGGGAAAAATGGAAGCCAGAGTGTAGGACATAGTTCTCCAAC	2	50:A>C	0	-	NM_001128086	601	CTCCTAGAGGAACTCACGGACCCCACGATTAGGAACAGCAAACTCGAAACACCG	Anks1b
SRR029642.4899929	-	7	4	24	AAAAGGGAAGCCAGAGTGTAACAGAAAAGGGGAGTGCTCTTCACGAAGCGGCTT	2	49:T>G	0	+	NM_001128086	1168	AAACTCTGCCAAGAAAAGGACTATTCCTTTGAAGATCTGTGCCATACGATCTCA	Anks1b
SRR029642.1278040	+	7	3	6	CAGAGGAAGAGCTTGGGAAAAATGGAAGCCAGAGTGTAAACAACGAGAACGAAA	2		0	-	NM_001128086	601	CTCCTAGAGGAACTCACGGACCCCACGATTAGGAACAGCAAACTCGAAACACCG	Anks1b
SRR029642.3769940	-	7	4	13	AGAGCTTGGGAAAAATGGAAGCCAGAGTGTAACAGAAAAGGGGAGTGCTCTTCA	2		0	+	NM_001128086	1168	AAACTCTGCCAAGAAAAGGACTATTCCTTTGAAGATCTGTGCCATACGATCTCA	Anks1b
SRR029642.10529787	+	11	3	22	AACGAGGGAGCTGAACACGCAGAACAACGAGAACGAAACCGCCCTCCACTGTGC	2		0	-	NM_001128086	601	CTCCTAGAGGAACTCACGGACCCCACGATTAGGAACAGCAAACTCGAAACACCG	Anks1b
SRR029642.1292148	-	7	4	15	AGCTTGGGAAAAATGGAAGCCAGAGTGTAACAGAAAAGGGGAGTGCTCTTCACG	2		0	+	NM_001128086	1168	AAACTCTGCCAAGAAAAGGACTATTCCTTTGAAGATCTGTGCCATACGATCTCA	Anks1b
SRR029642.8185299	+	7	3	28	TGGAAGCCAGAGTGTAAACAACGAGAACGAAACCGCCCTCCACTGTGCAGCGCA	2		0	-	NM_001128086	601	CTCCTAGAGGAACTCACGGACCCCACGATTAGGAACAGCAAACTCGAAACACCG	Anks1b
SRR029642.20784251	-	7	4	16	GCGTGGGAAAAATGGAAGCCAGAGTGTAACAGAAAAGGGGAGTGCTCTTCACGA	2	51:T>G	0	+	NM_001128086	1166	TAAAACTCTGCCAAGAAAAGGACTATTCCTTTGAAGATCTGTGCCATACGATCT	Anks1b
SRR029642.10529787	+	11	3	22	AACGAGGGAGCTGAACACGCAGAACAACGAGAACGAAACCGCCCTCCACTGTGC	2		0	-	NM_001128086	446	CCATTCACCTGGCTGCCTGGAAAGGAGACGTGGAGATTGTGAAGATCCTCATCC	Anks1b
SRR029642.20192920	-	7	4	19	GGGGAAAAATGGAAGCCAGAGTGTAATAGAAAAGGGGAGTGCTCTTCACGAAGC	2	27:C>T,53:T>G	0	+	NM_001128086	1166	TAAAACTCTGCCAAGAAAAGGACTATTCCTTTGAAGATCTGTGCCATACGATCT	Anks1b
SRR029642.4147227	+	7	4	26	AATGGAAGCCAGAGTGTAACAGAAAAGGGGAGTGCTCTTCACGAAGCGGCTTTG	2		1	-	NM_001128086	613	CTCACGGACTCCACGATTAGGAACAGCAAACTCGAAACACCGCTGGACTTGGCA	Anks1b
SRR029642.18842366	-	7	2	15	AGCTTGGGAAAAATGGAAGCCAGAGTGTAGGACATAGTTCTCAAACTGCTGCAG	2		0	+	NM_001128086	1166	TAAAACTCTGCCAAGAAAAGGACTATTCCTTTGAAGATCTGTGCCATACGATCT	Anks1b
SRR029642.5632641	+	7	2	7	AGAGGAAGAGCTTGGGAAAAATGGAAGCCAGAGTGTAGGACATAGTTCTCCAAC	2	50:A>C	1	-	NM_001128086	613	CTCACGGACTCCACGATTAGGAACAGCAAACTCGAAACACCGCTGGACTTGGCA	Anks1b
SRR029642.18811776	-	7	4	19	GGGGAAAAATGGAAGCCAGAGTGTAACAGAAAAGGGGAGTGCTCTTCACGAAGC	2	53:T>G	0	+	NM_001128086	1166	TAAAACTCTGCCAAGAAAAGGACTATTCCTTTGAAGATCTGTGCCATACGATCT	Anks1b
SRR029642.8185299	+	7	3	28	TGGAAGCCAGAGTGTAAACAACGAGAACGAAACCGCCCTCCACTGTGCAGCGCA	2		1	-	NM_001128086	613	CTCACGGACTCCACGATTAGGAACAGCAAACTCGAAACACCGCTGGACTTGGCA	Anks1b
SRR029642.18583148	-	8	4	13	GAGGAACCTTGGCTTTCCCATGCTCGCACAGACAGAAAAGGGGAGTGCTCTTCA	2	53:T>G	0	+	NM_001128086	1166	TAAAACTCTGCCAAGAAAAGGACTATTCCTTTGAAGATCTGTGCCATACGATCT	Anks1b
SRR029642.1278040	+	7	3	6	CAGAGGAAGAGCTTGGGAAAAATGGAAGCCAGAGTGTAAACAACGAGAACGAAA	2		1	-	NM_001128086	613	CTCACGGACTCCACGATTAGGAACAGCAAACTCGAAACACCGCTGGACTTGGCA	Anks1b
SRR029642.18480892	-	8	4	14	AGGAACCTTGGCTTTCCCATGCTCGCACAGACAGAAAAGGGGAGTGCTCTTCAC	2		0	+	NM_001128086	1166	TAAAACTCTGCCAAGAAAAGGACTATTCCTTTGAAGATCTGTGCCATACGATCT	Anks1b
SRR029642.5632641	+	7	2	7	AGAGGAAGAGCTTGGGAAAAATGGAAGCCAGAGTGTAGGACATAGTTCTCCAAC	2	50:A>C	0	-	NM_001128086	446	CCATTCACCTGGCTGCCTGGAAAGGAGACGTGGAGATTGTGAAGATCCTCATCC	Anks1b
SRR029642.14588765	-	8	4	14	AGGGACCTTGGCTTTCCCATGCTCGCACAGACAGAAAAGGGGAGTGCTCTTCAC	2	50:A>G	0	+	NM_001128086	1166	TAAAACTCTGCCAAGAAAAGGACTATTCCTTTGAAGATCTGTGCCATACGATCT	Anks1b
SRR029642.4147227	+	7	4	26	AATGGAAGCCAGAGTGTAACAGAAAAGGGGAGTGCTCTTCACGAAGCGGCTTTG	2		0	-	NM_001128086	446	CCATTCACCTGGCTGCCTGGAAAGGAGACGTGGAGATTGTGAAGATCCTCATCC	Anks1b
SRR029642.14218026	-	7	4	15	AGCTTGGGAAAAATGGAAGCCAGAGTGTAACAGAAAAGGGGAGTGCTCTTCACG	2		0	+	NM_001128086	1166	TAAAACTCTGCCAAGAAAAGGACTATTCCTTTGAAGATCTGTGCCATACGATCT	Anks1b
SRR029642.20784251	-	7	4	16	GCGTGGGAAAAATGGAAGCCAGAGTGTAACAGAAAAGGGGAGTGCTCTTCACGA	2	51:T>G	0	+	NM_001128086	1305	AATAAATTTGTCACCAGGAGAAGTGGAAGACGAAGAGGAGGATCCAAACTCTTG	Anks1b
SRR029642.12679327	-	7	4	24	AAAAGGGAAGCCAGAGTGTAACAGAAAAGGGGAGTGCTCTTCACGAAGCGGCTT	2	49:T>G	0	+	NM_001128086	1166	TAAAACTCTGCCAAGAAAAGGACTATTCCTTTGAAGATCTGTGCCATACGATCT	Anks1b
SRR029642.20549731	+	9	4	18	GTCACGTGTTTACTGCCTTTGATGTGGTTTTAAAAATCAGTTTGATTGGCCACA	2		0	-	NM_001177397	454	AGCCCCCTCGGTCCATCACCCTCAGGGAACCCAGTGGTAATCACACTCCTCCTC	Anks1b
SRR029642.9248342	-	7	4	14	GAGCTTGGGAAAAAGGGAAGCCAGAGTGTAACAGAAAAGGGGAGTGCTCTTCAC	2	39:T>G	0	+	NM_001128086	1166	TAAAACTCTGCCAAGAAAAGGACTATTCCTTTGAAGATCTGTGCCATACGATCT	Anks1b
SRR029642.5632641	+	7	2	7	AGAGGAAGAGCTTGGGAAAAATGGAAGCCAGAGTGTAGGACATAGTTCTCCAAC	2	50:A>C	0	-	NM_001128086	921	CATAAAGGACAGTTTAGGTAGAACTGTCTTAGACATTCTAAAAGAGCACCCGTC	Anks1b
SRR029642.7099722	-	7	4	10	GGAAGAGCTTGGGAAAAATGGAAGCCAGAGTGTAACAGAAAAGGGGAGTGCTCT	2		0	+	NM_001128086	1166	TAAAACTCTGCCAAGAAAAGGACTATTCCTTTGAAGATCTGTGCCATACGATCT	Anks1b
SRR029642.18583148	-	8	4	13	GAGGAACCTTGGCTTTCCCATGCTCGCACAGACAGAAAAGGGGAGTGCTCTTCA	2	53:T>G	0	+	NM_001128086	1158	GGATGAAATAAAACTCTGCCAAGAAAAGGACTATTCCTTTGAAGATCTGTGCCA	Anks1b
SRR029642.4899929	-	7	4	24	AAAAGGGAAGCCAGAGTGTAACAGAAAAGGGGAGTGCTCTTCACGAAGCGGCTT	2	49:T>G	0	+	NM_001128086	1166	TAAAACTCTGCCAAGAAAAGGACTATTCCTTTGAAGATCTGTGCCATACGATCT	Anks1b
SRR029642.4402938	+	9	5	0	AGTCCAACCACCACTACTGTCACGTGTTTACTGCCTTTGATGTGTCGTCTGTCT	2		0	-	NM_001177396	1097	CGATCCATCAGGTTCATAATACAGGGGACTGGGGAGAACCTTCCATCACCTTGC	Anks1b
SRR029642.3769940	-	7	4	13	AGAGCTTGGGAAAAATGGAAGCCAGAGTGTAACAGAAAAGGGGAGTGCTCTTCA	2		0	+	NM_001128086	1166	TAAAACTCTGCCAAGAAAAGGACTATTCCTTTGAAGATCTGTGCCATACGATCT	Anks1b
SRR029642.3769940	-	7	4	13	AGAGCTTGGGAAAAATGGAAGCCAGAGTGTAACAGAAAAGGGGAGTGCTCTTCA	2		0	+	NM_001128086	1305	AATAAATTTGTCACCAGGAGAAGTGGAAGACGAAGAGGAGGATCCAAACTCTTG	Anks1b
SRR029642.1292148	-	7	4	15	AGCTTGGGAAAAATGGAAGCCAGAGTGTAACAGAAAAGGGGAGTGCTCTTCACG	2		0	+	NM_001128086	1166	TAAAACTCTGCCAAGAAAAGGACTATTCCTTTGAAGATCTGTGCCATACGATCT	Anks1b
SRR029642.1278040	+	7	3	6	CAGAGGAAGAGCTTGGGAAAAATGGAAGCCAGAGTGTAAACAACGAGAACGAAA	2		0	-	NM_001128086	446	CCATTCACCTGGCTGCCTGGAAAGGAGACGTGGAGATTGTGAAGATCCTCATCC	Anks1b
SRR029642.20192920	-	7	4	19	GGGGAAAAATGGAAGCCAGAGTGTAATAGAAAAGGGGAGTGCTCTTCACGAAGC	2	27:C>T,53:T>G	0	+	NM_001128086	1167	AAAACTCTGCCAAGAAAAGGACTATTCCTTTGAAGATCTGTGCCATACGATCTC	Anks1b
SRR029642.14588765	-	8	4	14	AGGGACCTTGGCTTTCCCATGCTCGCACAGACAGAAAAGGGGAGTGCTCTTCAC	2	50:A>G	0	+	NM_001128086	1158	GGATGAAATAAAACTCTGCCAAGAAAAGGACTATTCCTTTGAAGATCTGTGCCA	Anks1b
SRR029642.20784251	-	7	4	16	GCGTGGGAAAAATGGAAGCCAGAGTGTAACAGAAAAGGGGAGTGCTCTTCACGA	2	51:T>G	0	+	NM_001128086	1167	AAAACTCTGCCAAGAAAAGGACTATTCCTTTGAAGATCTGTGCCATACGATCTC	Anks1b
SRR029642.4147227	+	7	4	26	AATGGAAGCCAGAGTGTAACAGAAAAGGGGAGTGCTCTTCACGAAGCGGCTTTG	2		1	-	NM_001128086	3008	AGCCCCCTCGGTCCATCACCCTCAGGGAACCCAGTGGTAATCATACTCCTCCTC	Anks1b
SRR029642.20784251	-	7	4	16	GCGTGGGAAAAATGGAAGCCAGAGTGTAACAGAAAAGGGGAGTGCTCTTCACGA	2	51:T>G	0	+	NM_001128086	1168	AAACTCTGCCAAGAAAAGGACTATTCCTTTGAAGATCTGTGCCATACGATCTCA	Anks1b
SRR029642.18842366	-	7	2	15	AGCTTGGGAAAAATGGAAGCCAGAGTGTAGGACATAGTTCTCAAACTGCTGCAG	2		0	+	NM_001128086	1167	AAAACTCTGCCAAGAAAAGGACTATTCCTTTGAAGATCTGTGCCATACGATCTC	Anks1b
SRR029642.18811776	-	7	4	19	GGGGAAAAATGGAAGCCAGAGTGTAACAGAAAAGGGGAGTGCTCTTCACGAAGC	2	53:T>G	0	+	NM_001128086	1305	AATAAATTTGTCACCAGGAGAAGTGGAAGACGAAGAGGAGGATCCAAACTCTTG	Anks1b
SRR029642.18583148	-	8	4	13	GAGGAACCTTGGCTTTCCCATGCTCGCACAGACAGAAAAGGGGAGTGCTCTTCA	2	53:T>G	0	+	NM_001128086	1169	AACTCTGCCAAGAAAAGGACTATTCCTTTGAAGATCTGTGCCATACGATCTCAG	Anks1b
SRR029642.18583148	-	8	4	13	GAGGAACCTTGGCTTTCCCATGCTCGCACAGACAGAAAAGGGGAGTGCTCTTCA	2	53:T>G	0	+	NM_001128086	1305	AATAAATTTGTCACCAGGAGAAGTGGAAGACGAAGAGGAGGATCCAAACTCTTG	Anks1b
SRR029642.18480892	-	8	4	14	AGGAACCTTGGCTTTCCCATGCTCGCACAGACAGAAAAGGGGAGTGCTCTTCAC	2		0	+	NM_001128086	1158	GGATGAAATAAAACTCTGCCAAGAAAAGGACTATTCCTTTGAAGATCTGTGCCA	Anks1b
SRR029642.18480892	-	8	4	14	AGGAACCTTGGCTTTCCCATGCTCGCACAGACAGAAAAGGGGAGTGCTCTTCAC	2		0	+	NM_001128086	1305	AATAAATTTGTCACCAGGAGAAGTGGAAGACGAAGAGGAGGATCCAAACTCTTG	Anks1b
SRR029642.1001572	+	8	4	9	ACCACTACTGTCACGTGTTTACTGCCTTTGATGTGCAGTCGTCTGTCTGTGAAA	2		0	-	NM_001177398	938	ATACAGGGGACTGGGGAGAACCTTCCATCACCTTGCGACCTCCTAATGAAGCCA	Anks1b
SRR029642.14588765	-	8	4	14	AGGGACCTTGGCTTTCCCATGCTCGCACAGACAGAAAAGGGGAGTGCTCTTCAC	2	50:A>G	0	+	NM_001128086	1305	AATAAATTTGTCACCAGGAGAAGTGGAAGACGAAGAGGAGGATCCAAACTCTTG	Anks1b
SRR029642.10529787	+	11	3	22	AACGAGGGAGCTGAACACGCAGAACAACGAGAACGAAACCGCCCTCCACTGTGC	2		0	-	NM_001128086	921	CATAAAGGACAGTTTAGGTAGAACTGTCTTAGACATTCTAAAAGAGCACCCGTC	Anks1b
SRR029642.14218026	-	7	4	15	AGCTTGGGAAAAATGGAAGCCAGAGTGTAACAGAAAAGGGGAGTGCTCTTCACG	2		0	+	NM_001128086	1305	AATAAATTTGTCACCAGGAGAAGTGGAAGACGAAGAGGAGGATCCAAACTCTTG	Anks1b
SRR029642.20192920	-	7	4	19	GGGGAAAAATGGAAGCCAGAGTGTAATAGAAAAGGGGAGTGCTCTTCACGAAGC	2	27:C>T,53:T>G	0	+	NM_001128086	1167	AAAACTCTGCCAAGAAAAGGACTATTCCTTTGAAGATCTGTGCCATACGATCTC	Anks1b
SRR029642.12679327	-	7	4	24	AAAAGGGAAGCCAGAGTGTAACAGAAAAGGGGAGTGCTCTTCACGAAGCGGCTT	2	49:T>G	0	+	NM_001128086	1305	AATAAATTTGTCACCAGGAGAAGTGGAAGACGAAGAGGAGGATCCAAACTCTTG	Anks1b
SRR029642.8185299	+	7	3	28	TGGAAGCCAGAGTGTAAACAACGAGAACGAAACCGCCCTCCACTGTGCAGCGCA	2		0	-	NM_001128086	921	CATAAAGGACAGTTTAGGTAGAACTGTCTTAGACATTCTAAAAGAGCACCCGTC	Anks1b
SRR029642.9248342	-	7	4	14	GAGCTTGGGAAAAAGGGAAGCCAGAGTGTAACAGAAAAGGGGAGTGCTCTTCAC	2	39:T>G	0	+	NM_001128086	1305	AATAAATTTGTCACCAGGAGAAGTGGAAGACGAAGAGGAGGATCCAAACTCTTG	Anks1b
SRR029642.20784251	-	7	4	16	GCGTGGGAAAAATGGAAGCCAGAGTGTAACAGAAAAGGGGAGTGCTCTTCACGA	2	51:T>G	0	+	NM_001128086	1167	AAAACTCTGCCAAGAAAAGGACTATTCCTTTGAAGATCTGTGCCATACGATCTC	Anks1b
SRR029642.7099722	-	7	4	10	GGAAGAGCTTGGGAAAAATGGAAGCCAGAGTGTAACAGAAAAGGGGAGTGCTCT	2		0	+	NM_001128086	1305	AATAAATTTGTCACCAGGAGAAGTGGAAGACGAAGAGGAGGATCCAAACTCTTG	Anks1b
SRR029642.8185299	+	7	3	28	TGGAAGCCAGAGTGTAAACAACGAGAACGAAACCGCCCTCCACTGTGCAGCGCA	2		0	-	NM_001128086	609	GGAACTCACGGACCCCACGATTAGGAACAGCAAACTCGAAACACCGCTGGACTT	Anks1b
SRR029642.4899929	-	7	4	24	AAAAGGGAAGCCAGAGTGTAACAGAAAAGGGGAGTGCTCTTCACGAAGCGGCTT	2	49:T>G	0	+	NM_001128086	1305	AATAAATTTGTCACCAGGAGAAGTGGAAGACGAAGAGGAGGATCCAAACTCTTG	Anks1b
SRR029642.9248342	-	7	4	14	GAGCTTGGGAAAAAGGGAAGCCAGAGTGTAACAGAAAAGGGGAGTGCTCTTCAC	2	39:T>G	0	+	NM_001128086	1158	GGATGAAATAAAACTCTGCCAAGAAAAGGACTATTCCTTTGAAGATCTGTGCCA	Anks1b
SRR029642.1292148	-	7	4	15	AGCTTGGGAAAAATGGAAGCCAGAGTGTAACAGAAAAGGGGAGTGCTCTTCACG	2		0	+	NM_001128086	1305	AATAAATTTGTCACCAGGAGAAGTGGAAGACGAAGAGGAGGATCCAAACTCTTG	Anks1b
SRR029642.18811776	-	7	4	19	GGGGAAAAATGGAAGCCAGAGTGTAACAGAAAAGGGGAGTGCTCTTCACGAAGC	2	53:T>G	0	+	NM_001128086	1167	AAAACTCTGCCAAGAAAAGGACTATTCCTTTGAAGATCTGTGCCATACGATCTC	Anks1b
SRR029642.3769940	-	7	4	13	AGAGCTTGGGAAAAATGGAAGCCAGAGTGTAACAGAAAAGGGGAGTGCTCTTCA	2		0	+	NM_001128086	1305	AATAAATTTGTCACCAGGAGAAGTGGAAGACGAAGAGGAGGATCCAAACTCTTG	Anks1b
SRR029642.4899929	-	7	4	24	AAAAGGGAAGCCAGAGTGTAACAGAAAAGGGGAGTGCTCTTCACGAAGCGGCTT	2	49:T>G	0	+	NM_001128086	1167	AAAACTCTGCCAAGAAAAGGACTATTCCTTTGAAGATCTGTGCCATACGATCTC	Anks1b
SRR029642.20784251	-	7	4	16	GCGTGGGAAAAATGGAAGCCAGAGTGTAACAGAAAAGGGGAGTGCTCTTCACGA	2	51:T>G	0	+	NM_001128086	1305	AATAAATTTGTCACCAGGAGAAGTGGAAGACGAAGAGGAGGATCCAAACTCTTG	Anks1b
SRR029642.18480892	-	8	4	14	AGGAACCTTGGCTTTCCCATGCTCGCACAGACAGAAAAGGGGAGTGCTCTTCAC	2		0	+	NM_001128086	1167	AAAACTCTGCCAAGAAAAGGACTATTCCTTTGAAGATCTGTGCCATACGATCTC	Anks1b
SRR029642.20192920	-	7	4	19	GGGGAAAAATGGAAGCCAGAGTGTAATAGAAAAGGGGAGTGCTCTTCACGAAGC	2	27:C>T,53:T>G	0	+	NM_001128086	1305	AATAAATTTGTCACCAGGAGAAGTGGAAGACGAAGAGGAGGATCCAAACTCTTG	Anks1b
SRR029642.18583148	-	8	4	13	GAGGAACCTTGGCTTTCCCATGCTCGCACAGACAGAAAAGGGGAGTGCTCTTCA	2	53:T>G	0	+	NM_001128086	1167	AAAACTCTGCCAAGAAAAGGACTATTCCTTTGAAGATCTGTGCCATACGATCTC	Anks1b
SRR029642.18842366	-	7	2	15	AGCTTGGGAAAAATGGAAGCCAGAGTGTAGGACATAGTTCTCAAACTGCTGCAG	2		0	+	NM_001128086	1305	AATAAATTTGTCACCAGGAGAAGTGGAAGACGAAGAGGAGGATCCAAACTCTTG	Anks1b
SRR029642.7099722	-	7	4	10	GGAAGAGCTTGGGAAAAATGGAAGCCAGAGTGTAACAGAAAAGGGGAGTGCTCT	2		0	+	NM_001128086	1167	AAAACTCTGCCAAGAAAAGGACTATTCCTTTGAAGATCTGTGCCATACGATCTC	Anks1b
SRR029642.20784251	-	7	4	16	GCGTGGGAAAAATGGAAGCCAGAGTGTAACAGAAAAGGGGAGTGCTCTTCACGA	2	51:T>G	0	+	NM_001128086	1163	AAATAAAACTCTGCCAAGAAAAGGACTATTCCTTTGAAGATCTGTGCCATACGA	Anks1b
SRR029642.9248342	-	7	4	14	GAGCTTGGGAAAAAGGGAAGCCAGAGTGTAACAGAAAAGGGGAGTGCTCTTCAC	2	39:T>G	0	+	NM_001128086	1167	AAAACTCTGCCAAGAAAAGGACTATTCCTTTGAAGATCTGTGCCATACGATCTC	Anks1b
SRR029642.20192920	-	7	4	19	GGGGAAAAATGGAAGCCAGAGTGTAATAGAAAAGGGGAGTGCTCTTCACGAAGC	2	27:C>T,53:T>G	0	+	NM_001128086	1163	AAATAAAACTCTGCCAAGAAAAGGACTATTCCTTTGAAGATCTGTGCCATACGA	Anks1b
SRR029642.12679327	-	7	4	24	AAAAGGGAAGCCAGAGTGTAACAGAAAAGGGGAGTGCTCTTCACGAAGCGGCTT	2	49:T>G	0	+	NM_001128086	1167	AAAACTCTGCCAAGAAAAGGACTATTCCTTTGAAGATCTGTGCCATACGATCTC	Anks1b
SRR029642.18842366	-	7	2	15	AGCTTGGGAAAAATGGAAGCCAGAGTGTAGGACATAGTTCTCAAACTGCTGCAG	2		0	+	NM_001128086	1163	AAATAAAACTCTGCCAAGAAAAGGACTATTCCTTTGAAGATCTGTGCCATACGA	Anks1b
SRR029642.14588765	-	8	4	14	AGGGACCTTGGCTTTCCCATGCTCGCACAGACAGAAAAGGGGAGTGCTCTTCAC	2	50:A>G	0	+	NM_001128086	1167	AAAACTCTGCCAAGAAAAGGACTATTCCTTTGAAGATCTGTGCCATACGATCTC	Anks1b
SRR029642.18811776	-	7	4	19	GGGGAAAAATGGAAGCCAGAGTGTAACAGAAAAGGGGAGTGCTCTTCACGAAGC	2	53:T>G	0	+	NM_001128086	1163	AAATAAAACTCTGCCAAGAAAAGGACTATTCCTTTGAAGATCTGTGCCATACGA	Anks1b
SRR029642.14218026	-	7	4	15	AGCTTGGGAAAAATGGAAGCCAGAGTGTAACAGAAAAGGGGAGTGCTCTTCACG	2		0	+	NM_001128086	1167	AAAACTCTGCCAAGAAAAGGACTATTCCTTTGAAGATCTGTGCCATACGATCTC	Anks1b
SRR029642.18583148	-	8	4	13	GAGGAACCTTGGCTTTCCCATGCTCGCACAGACAGAAAAGGGGAGTGCTCTTCA	2	53:T>G	0	+	NM_001128086	1163	AAATAAAACTCTGCCAAGAAAAGGACTATTCCTTTGAAGATCTGTGCCATACGA	Anks1b
SRR029642.14218026	-	7	4	15	AGCTTGGGAAAAATGGAAGCCAGAGTGTAACAGAAAAGGGGAGTGCTCTTCACG	2		0	+	NM_001128086	1158	GGATGAAATAAAACTCTGCCAAGAAAAGGACTATTCCTTTGAAGATCTGTGCCA	Anks1b
SRR029642.14218026	-	7	4	15	AGCTTGGGAAAAATGGAAGCCAGAGTGTAACAGAAAAGGGGAGTGCTCTTCACG	2		0	+	NM_001128086	1163	AAATAAAACTCTGCCAAGAAAAGGACTATTCCTTTGAAGATCTGTGCCATACGA	Anks1b
SRR029642.1292148	-	7	4	15	AGCTTGGGAAAAATGGAAGCCAGAGTGTAACAGAAAAGGGGAGTGCTCTTCACG	2		0	+	NM_001128086	1167	AAAACTCTGCCAAGAAAAGGACTATTCCTTTGAAGATCTGTGCCATACGATCTC	Anks1b
SRR029642.12679327	-	7	4	24	AAAAGGGAAGCCAGAGTGTAACAGAAAAGGGGAGTGCTCTTCACGAAGCGGCTT	2	49:T>G	0	+	NM_001128086	1163	AAATAAAACTCTGCCAAGAAAAGGACTATTCCTTTGAAGATCTGTGCCATACGA	Anks1b
SRR029642.1292148	-	7	4	15	AGCTTGGGAAAAATGGAAGCCAGAGTGTAACAGAAAAGGGGAGTGCTCTTCACG	2		0	+	NM_001128086	1167	AAAACTCTGCCAAGAAAAGGACTATTCCTTTGAAGATCTGTGCCATACGATCTC	Anks1b
SRR029642.9248342	-	7	4	14	GAGCTTGGGAAAAAGGGAAGCCAGAGTGTAACAGAAAAGGGGAGTGCTCTTCAC	2	39:T>G	0	+	NM_001128086	1163	AAATAAAACTCTGCCAAGAAAAGGACTATTCCTTTGAAGATCTGTGCCATACGA	Anks1b
SRR029642.3769940	-	7	4	13	AGAGCTTGGGAAAAATGGAAGCCAGAGTGTAACAGAAAAGGGGAGTGCTCTTCA	2		0	+	NM_001128086	1167	AAAACTCTGCCAAGAAAAGGACTATTCCTTTGAAGATCTGTGCCATACGATCTC	Anks1b
SRR029642.7099722	-	7	4	10	GGAAGAGCTTGGGAAAAATGGAAGCCAGAGTGTAACAGAAAAGGGGAGTGCTCT	2		0	+	NM_001128086	1163	AAATAAAACTCTGCCAAGAAAAGGACTATTCCTTTGAAGATCTGTGCCATACGA	Anks1b
SRR029642.10529787	+	11	3	22	AACGAGGGAGCTGAACACGCAGAACAACGAGAACGAAACCGCCCTCCACTGTGC	2		1	-	NM_001128086	3008	AGCCCCCTCGGTCCATCACCCTCAGGGAACCCAGTGGTAATCATACTCCTCCTC	Anks1b
SRR029642.4899929	-	7	4	24	AAAAGGGAAGCCAGAGTGTAACAGAAAAGGGGAGTGCTCTTCACGAAGCGGCTT	2	49:T>G	0	+	NM_001128086	1163	AAATAAAACTCTGCCAAGAAAAGGACTATTCCTTTGAAGATCTGTGCCATACGA	Anks1b
SRR029642.12679327	-	7	4	24	AAAAGGGAAGCCAGAGTGTAACAGAAAAGGGGAGTGCTCTTCACGAAGCGGCTT	2	49:T>G	0	+	NM_001128086	1158	GGATGAAATAAAACTCTGCCAAGAAAAGGACTATTCCTTTGAAGATCTGTGCCA	Anks1b
SRR029642.3769940	-	7	4	13	AGAGCTTGGGAAAAATGGAAGCCAGAGTGTAACAGAAAAGGGGAGTGCTCTTCA	2		0	+	NM_001128086	1163	AAATAAAACTCTGCCAAGAAAAGGACTATTCCTTTGAAGATCTGTGCCATACGA	Anks1b
SRR029642.8185299	+	7	3	28	TGGAAGCCAGAGTGTAAACAACGAGAACGAAACCGCCCTCCACTGTGCAGCGCA	2		1	-	NM_001128086	3008	AGCCCCCTCGGTCCATCACCCTCAGGGAACCCAGTGGTAATCATACTCCTCCTC	Anks1b
SRR029642.1292148	-	7	4	15	AGCTTGGGAAAAATGGAAGCCAGAGTGTAACAGAAAAGGGGAGTGCTCTTCACG	2		0	+	NM_001128086	1163	AAATAAAACTCTGCCAAGAAAAGGACTATTCCTTTGAAGATCTGTGCCATACGA	Anks1b
SRR029642.5632641	+	7	2	7	AGAGGAAGAGCTTGGGAAAAATGGAAGCCAGAGTGTAGGACATAGTTCTCCAAC	2	50:A>C	1	-	NM_001128086	3008	AGCCCCCTCGGTCCATCACCCTCAGGGAACCCAGTGGTAATCATACTCCTCCTC	Anks1b
SRR029642.14588765	-	8	4	14	AGGGACCTTGGCTTTCCCATGCTCGCACAGACAGAAAAGGGGAGTGCTCTTCAC	2	50:A>G	0	+	NM_001128086	1163	AAATAAAACTCTGCCAAGAAAAGGACTATTCCTTTGAAGATCTGTGCCATACGA	Anks1b
SRR029642.4899929	-	7	4	24	AAAAGGGAAGCCAGAGTGTAACAGAAAAGGGGAGTGCTCTTCACGAAGCGGCTT	2	49:T>G	0	+	NM_001128086	1158	GGATGAAATAAAACTCTGCCAAGAAAAGGACTATTCCTTTGAAGATCTGTGCCA	Anks1b
SRR029642.20784251	-	7	4	16	GCGTGGGAAAAATGGAAGCCAGAGTGTAACAGAAAAGGGGAGTGCTCTTCACGA	2	51:T>G	0	+	NM_001128086	1175	GCCAAGAAAAGGACTATTCCTTTGAAGATCTGTGCCATACGATCTCAGACCACT	Anks1b
SRR029642.7099722	-	7	4	10	GGAAGAGCTTGGGAAAAATGGAAGCCAGAGTGTAACAGAAAAGGGGAGTGCTCT	2		0	+	NM_001128086	1158	GGATGAAATAAAACTCTGCCAAGAAAAGGACTATTCCTTTGAAGATCTGTGCCA	Anks1b
SRR029642.18480892	-	8	4	14	AGGAACCTTGGCTTTCCCATGCTCGCACAGACAGAAAAGGGGAGTGCTCTTCAC	2		0	+	NM_001128086	1163	AAATAAAACTCTGCCAAGAAAAGGACTATTCCTTTGAAGATCTGTGCCATACGA	Anks1b
SRR029642.3769940	-	7	4	13	AGAGCTTGGGAAAAATGGAAGCCAGAGTGTAACAGAAAAGGGGAGTGCTCTTCA	2		0	+	NM_001128086	1158	GGATGAAATAAAACTCTGCCAAGAAAAGGACTATTCCTTTGAAGATCTGTGCCA	Anks1b
SRR029642.18811776	-	7	4	19	GGGGAAAAATGGAAGCCAGAGTGTAACAGAAAAGGGGAGTGCTCTTCACGAAGC	2	53:T>G	0	+	NM_001128086	1175	GCCAAGAAAAGGACTATTCCTTTGAAGATCTGTGCCATACGATCTCAGACCACT	Anks1b
SRR029642.1292148	-	7	4	15	AGCTTGGGAAAAATGGAAGCCAGAGTGTAACAGAAAAGGGGAGTGCTCTTCACG	2		0	+	NM_001128086	1158	GGATGAAATAAAACTCTGCCAAGAAAAGGACTATTCCTTTGAAGATCTGTGCCA	Anks1b
SRR029642.18583148	-	8	4	13	GAGGAACCTTGGCTTTCCCATGCTCGCACAGACAGAAAAGGGGAGTGCTCTTCA	2	53:T>G	0	+	NM_001128086	1175	GCCAAGAAAAGGACTATTCCTTTGAAGATCTGTGCCATACGATCTCAGACCACT	Anks1b
SRR029642.18811776	-	7	4	19	GGGGAAAAATGGAAGCCAGAGTGTAACAGAAAAGGGGAGTGCTCTTCACGAAGC	2	53:T>G	0	+	NM_001128086	1169	AACTCTGCCAAGAAAAGGACTATTCCTTTGAAGATCTGTGCCATACGATCTCAG	Anks1b
SRR029642.18480892	-	8	4	14	AGGAACCTTGGCTTTCCCATGCTCGCACAGACAGAAAAGGGGAGTGCTCTTCAC	2		0	+	NM_001128086	1175	GCCAAGAAAAGGACTATTCCTTTGAAGATCTGTGCCATACGATCTCAGACCACT	Anks1b
SRR029642.3769940	-	7	4	13	AGAGCTTGGGAAAAATGGAAGCCAGAGTGTAACAGAAAAGGGGAGTGCTCTTCA	2		0	+	NM_001128086	1167	AAAACTCTGCCAAGAAAAGGACTATTCCTTTGAAGATCTGTGCCATACGATCTC	Anks1b
SRR029642.14588765	-	8	4	14	AGGGACCTTGGCTTTCCCATGCTCGCACAGACAGAAAAGGGGAGTGCTCTTCAC	2	50:A>G	0	+	NM_001128086	1175	GCCAAGAAAAGGACTATTCCTTTGAAGATCTGTGCCATACGATCTCAGACCACT	Anks1b
SRR029642.12679327	-	7	4	24	AAAAGGGAAGCCAGAGTGTAACAGAAAAGGGGAGTGCTCTTCACGAAGCGGCTT	2	49:T>G	0	+	NM_001128086	1305	AATAAATTTGTCACCAGGAGAAGTGGAAGACGAAGAGGAGGATCCAAACTCTTG	Anks1b
SRR029642.14218026	-	7	4	15	AGCTTGGGAAAAATGGAAGCCAGAGTGTAACAGAAAAGGGGAGTGCTCTTCACG	2		0	+	NM_001128086	1175	GCCAAGAAAAGGACTATTCCTTTGAAGATCTGTGCCATACGATCTCAGACCACT	Anks1b
SRR029642.1278040	+	7	3	6	CAGAGGAAGAGCTTGGGAAAAATGGAAGCCAGAGTGTAAACAACGAGAACGAAA	2		1	-	NM_001128086	3008	AGCCCCCTCGGTCCATCACCCTCAGGGAACCCAGTGGTAATCATACTCCTCCTC	Anks1b
SRR029642.20192920	-	7	4	19	GGGGAAAAATGGAAGCCAGAGTGTAATAGAAAAGGGGAGTGCTCTTCACGAAGC	2	27:C>T,53:T>G	0	+	NM_001128086	1175	GCCAAGAAAAGGACTATTCCTTTGAAGATCTGTGCCATACGATCTCAGACCACT	Anks1b
SRR029642.20784251	-	7	4	16	GCGTGGGAAAAATGGAAGCCAGAGTGTAACAGAAAAGGGGAGTGCTCTTCACGA	2	51:T>G	0	+	NM_001128086	1167	AAAACTCTGCCAAGAAAAGGACTATTCCTTTGAAGATCTGTGCCATACGATCTC	Anks1b
SRR029642.9248342	-	7	4	14	GAGCTTGGGAAAAAGGGAAGCCAGAGTGTAACAGAAAAGGGGAGTGCTCTTCAC	2	39:T>G	0	+	NM_001128086	1175	GCCAAGAAAAGGACTATTCCTTTGAAGATCTGTGCCATACGATCTCAGACCACT	Anks1b
SRR029642.7099722	-	7	4	10	GGAAGAGCTTGGGAAAAATGGAAGCCAGAGTGTAACAGAAAAGGGGAGTGCTCT	2		0	+	NM_001128086	1167	AAAACTCTGCCAAGAAAAGGACTATTCCTTTGAAGATCTGTGCCATACGATCTC	Anks1b
SRR029642.4899929	-	7	4	24	AAAAGGGAAGCCAGAGTGTAACAGAAAAGGGGAGTGCTCTTCACGAAGCGGCTT	2	49:T>G	0	+	NM_001128086	1175	GCCAAGAAAAGGACTATTCCTTTGAAGATCTGTGCCATACGATCTCAGACCACT	Anks1b
SRR029642.4899929	-	7	4	24	AAAAGGGAAGCCAGAGTGTAACAGAAAAGGGGAGTGCTCTTCACGAAGCGGCTT	2	49:T>G	0	+	NM_001128086	1167	AAAACTCTGCCAAGAAAAGGACTATTCCTTTGAAGATCTGTGCCATACGATCTC	Anks1b
SRR029642.3769940	-	7	4	13	AGAGCTTGGGAAAAATGGAAGCCAGAGTGTAACAGAAAAGGGGAGTGCTCTTCA	2		0	+	NM_001128086	1175	GCCAAGAAAAGGACTATTCCTTTGAAGATCTGTGCCATACGATCTCAGACCACT	Anks1b
SRR029642.18583148	-	8	4	13	GAGGAACCTTGGCTTTCCCATGCTCGCACAGACAGAAAAGGGGAGTGCTCTTCA	2	53:T>G	0	+	NM_001128086	1167	AAAACTCTGCCAAGAAAAGGACTATTCCTTTGAAGATCTGTGCCATACGATCTC	Anks1b
SRR029642.1292148	-	7	4	15	AGCTTGGGAAAAATGGAAGCCAGAGTGTAACAGAAAAGGGGAGTGCTCTTCACG	2		0	+	NM_001128086	1175	GCCAAGAAAAGGACTATTCCTTTGAAGATCTGTGCCATACGATCTCAGACCACT	Anks1b
SRR029642.18842366	-	7	2	15	AGCTTGGGAAAAATGGAAGCCAGAGTGTAGGACATAGTTCTCAAACTGCTGCAG	2		0	+	NM_001128086	1167	AAAACTCTGCCAAGAAAAGGACTATTCCTTTGAAGATCTGTGCCATACGATCTC	Anks1b
SRR029642.18811776	-	7	4	19	GGGGAAAAATGGAAGCCAGAGTGTAACAGAAAAGGGGAGTGCTCTTCACGAAGC	2	53:T>G	0	+	NM_001128086	1167	AAAACTCTGCCAAGAAAAGGACTATTCCTTTGAAGATCTGTGCCATACGATCTC	Anks1b
SRR029642.20192920	-	7	4	19	GGGGAAAAATGGAAGCCAGAGTGTAATAGAAAAGGGGAGTGCTCTTCACGAAGC	2	27:C>T,53:T>G	0	+	NM_001128086	1167	AAAACTCTGCCAAGAAAAGGACTATTCCTTTGAAGATCTGTGCCATACGATCTC	Anks1b
SRR029642.20192920	-	7	4	19	GGGGAAAAATGGAAGCCAGAGTGTAATAGAAAAGGGGAGTGCTCTTCACGAAGC	2	27:C>T,53:T>G	0	+	NM_001128086	1305	AATAAATTTGTCACCAGGAGAAGTGGAAGACGAAGAGGAGGATCCAAACTCTTG	Anks1b
SRR029642.1356818	+	9	4	18	GTCACGTGTTTACTGCCTTTGATGTGGTTTTAAAAATCAGTTTGATTGGCCACA	2		0	-	NM_001177397	454	AGCCCCCTCGGTCCATCACCCTCAGGGAACCCAGTGGTAATCACACTCCTCCTC	Anks1b
SRR029642.9248342	-	7	4	14	GAGCTTGGGAAAAAGGGAAGCCAGAGTGTAACAGAAAAGGGGAGTGCTCTTCAC	2	39:T>G	0	+	NM_001128086	1167	AAAACTCTGCCAAGAAAAGGACTATTCCTTTGAAGATCTGTGCCATACGATCTC	Anks1b
SRR029642.12679327	-	7	4	24	AAAAGGGAAGCCAGAGTGTAACAGAAAAGGGGAGTGCTCTTCACGAAGCGGCTT	2	49:T>G	0	+	NM_001128086	1167	AAAACTCTGCCAAGAAAAGGACTATTCCTTTGAAGATCTGTGCCATACGATCTC	Anks1b
SRR029642.14588765	-	8	4	14	AGGGACCTTGGCTTTCCCATGCTCGCACAGACAGAAAAGGGGAGTGCTCTTCAC	2	50:A>G	0	+	NM_001128086	1167	AAAACTCTGCCAAGAAAAGGACTATTCCTTTGAAGATCTGTGCCATACGATCTC	Anks1b
SRR029642.14218026	-	7	4	15	AGCTTGGGAAAAATGGAAGCCAGAGTGTAACAGAAAAGGGGAGTGCTCTTCACG	2		0	+	NM_001128086	1167	AAAACTCTGCCAAGAAAAGGACTATTCCTTTGAAGATCTGTGCCATACGATCTC	Anks1b
SRR029642.18480892	-	8	4	14	AGGAACCTTGGCTTTCCCATGCTCGCACAGACAGAAAAGGGGAGTGCTCTTCAC	2		0	+	NM_001128086	1167	AAAACTCTGCCAAGAAAAGGACTATTCCTTTGAAGATCTGTGCCATACGATCTC	Anks1b
SRR029642.9929450	-	5	1	30	CTCCCGTACCCCAGCTATGTCTGAGCTCAGCGATGAAGCCAGCGAGCCGGAGCT	2	45:G>C,51:A>C	0	+	NM_028301	722	TGGAGCGACAGCCTGCATGTTAGCCAGGCAGTTTGGTCACATGAAGATTGTAGC	Anks3
SRR029642.7761436	+	15	13	18	TTTGTATCATTATGCTGCTGAATGTGCTACTGTTTTCCTGGAATTCTGGAAGAG	2		2	-	NM_178773	1845	GAGGAGGAAGAAATACGCCCCCAGTTTGAAGCCAAGTATTCCAAGAAAAAGCGG	Ano4
SRR029642.16572381	+	15	13	23	ATCATTATGCTGCTGAATGTGCTACTGTTTTCCTGGAATTCTGGAAGAGACGCC	2		2	-	NM_178773	1845	GAGGAGGAAGAAATACGCCCCCAGTTTGAAGCCAAGTATTCCAAGAAAAAGCGG	Ano4
SRR029642.7761436	+	15	13	18	TTTGTATCATTATGCTGCTGAATGTGCTACTGTTTTCCTGGAATTCTGGAAGAG	2		1	-	NM_178773	1852	AAGAAATACGACCCCAGTTTGAAGCCAAGTATTCTAAGAAAGAGCGGATGAATC	Ano4
SRR029642.16572381	+	15	13	23	ATCATTATGCTGCTGAATGTGCTACTGTTTTCCTGGAATTCTGGAAGAGACGCC	2		1	-	NM_178773	1852	AAGAAATACGACCCCAGTTTGAAGCCAAGTATTCTAAGAAAGAGCGGATGAATC	Ano4
SRR029642.9138304	-	7	3	34	GCACTTGGAGAGGAAAAGACAAGCATACGAATCTAACCTTATCTGCCATGGGCT	2		0	+	NM_175344	1036	ACTTTGCTTGGCTGGGCTATTACACGCAGATGCTCCTTCTCGCAGCTGTGGTGG	Ano6
SRR029642.10461746	-	7	3	19	GTGATCAGGATAACTGCACTTGGAGAGGAAAAGACAAGCATACGAATCTAACCT	2	53:T>G	0	+	NM_175344	1036	ACTTTGCTTGGCTGGGCTATTACACGCAGATGCTCCTTCTCGCAGCTGTGGTGG	Ano6
SRR029642.10461746	-	7	3	19	GTGATCAGGATAACTGCACTTGGAGAGGAAAAGACAAGCATACGAATCTAACCT	2	53:T>G	0	+	NM_175344	1015	ACGGCGAGAAGATTGGAATCTACTTTGCTTGGCTGGGCTATTACACGCAGATGC	Ano6
SRR029642.9138304	-	7	3	34	GCACTTGGAGAGGAAAAGACAAGCATACGAATCTAACCTTATCTGCCATGGGCT	2		0	+	NM_175344	1015	ACGGCGAGAAGATTGGAATCTACTTTGCTTGGCTGGGCTATTACACGCAGATGC	Ano6
SRR029642.8936901	+	3	1	24	CCCCGAATCCTGGTGGCCGGGCAAGAGCAAAGAGGCTGAGATCAAGAGGATCAA	2	17:T>C	0	-	NM_007458	2867	TCTGGGGTTTGGCTCTGCTCTTCTGGACAATGTGGATCCCAACCCTGAGAACTT	Ap2a1
SRR029642.7212490	-	3	1	2	CGAGGCTTTTGCTGCAGACATTCCCCGAATCCTGGTGGCTGGGCAAGAGCAAAG	2		0	+	NM_007458	483	AACGCTATCAAGAATGACCTGGCCAGTCGCAACCCCACCTTCATGTGCCTGGCC	Ap2a1
SRR029642.15164966	-	24	20	20	AGAAGGACTTTAAGAAGGAGCAAGGCAAAAGAAAGAAAACCCCAGCAAGAAAGA	2		0	+	NM_009680	3043	CTACACAGACGGCCAGTTTCCAATTGTGCACCAAGGATGACTGCTTCAACGTCA	Ap3b1
SRR029642.2811596	+	3	1	10	ACTGTCCATCTCTACTTTCCAACGTGGCCTAAAGGCATGATGACCTGAAAGAGA	2		0	-	NM_021492	491	GCAATGATCGCCCGGGGAAAGAATGCCTCGGACCTGTTCCCTGCAGTGGTGAAG	Ap3b2
SRR029642.3311273	-	3	1	10	ACTGTCCATCTCTACTTTCCAACGTGGCCTAAAGGCATGATGACCTGAAAGAGA	2		0	+	NM_021492	526	GTTCCCTGCAGTGGTGAAGAATGTGGCCTGTAAGAACATAGAGGTGAAGAAGCT	Ap3b2
SRR029642.9441367	+	3	1	19	CTCTACTTTCCAACGTGGCCTAAAGGCATGATGACCTGAAAGAGATGTTGGACA	2		0	-	NM_021492	491	GCAATGATCGCCCGGGGAAAGAATGCCTCGGACCTGTTCCCTGCAGTGGTGAAG	Ap3b2
SRR029642.19619928	-	3	1	24	CTTTCCAACGTGGCCTAAAGGCATGATGACCTGAAAGAGATGTTGGACACCAAC	2		0	+	NM_021492	539	GTGAAGAATGTGGCCTGTAAGAACATAGAGGTGAAGAAGCTTGTCTACGTGTAT	Ap3b2
SRR029642.16108751	-	3	1	8	CTACTGTCCATCTCTACTTTCCAACGTGGCCTAAAGGCATGATGACCTGAAAGA	2		0	+	NM_021492	541	GAAGAATGTGGCCTGTAAGAACATAGAGGTGAAGAAGCTTGTCTACGTGTATCT	Ap3b2
SRR029642.16108751	-	3	1	8	CTACTGTCCATCTCTACTTTCCAACGTGGCCTAAAGGCATGATGACCTGAAAGA	2		0	+	NM_021492	539	GTGAAGAATGTGGCCTGTAAGAACATAGAGGTGAAGAAGCTTGTCTACGTGTAT	Ap3b2
SRR029642.14645564	+	3	1	10	ACTGTCCATCTCTACTTTCCAACGTGGCCTAAAGGCATGATGACCTGAAAGAGA	2		0	-	NM_021492	490	GGCAATGATCGCCCGGGGAAAGAATGCCTCGGACCTGTTCCCTGCAGTGGTGAA	Ap3b2
SRR029642.3311273	-	3	1	10	ACTGTCCATCTCTACTTTCCAACGTGGCCTAAAGGCATGATGACCTGAAAGAGA	2		0	+	NM_021492	539	GTGAAGAATGTGGCCTGTAAGAACATAGAGGTGAAGAAGCTTGTCTACGTGTAT	Ap3b2
SRR029642.19619928	-	3	1	24	CTTTCCAACGTGGCCTAAAGGCATGATGACCTGAAAGAGATGTTGGACACCAAC	2		0	+	NM_021492	541	GAAGAATGTGGCCTGTAAGAACATAGAGGTGAAGAAGCTTGTCTACGTGTATCT	Ap3b2
SRR029642.19619928	-	3	1	24	CTTTCCAACGTGGCCTAAAGGCATGATGACCTGAAAGAGATGTTGGACACCAAC	2		0	+	NM_021492	526	GTTCCCTGCAGTGGTGAAGAATGTGGCCTGTAAGAACATAGAGGTGAAGAAGCT	Ap3b2
SRR029642.3311273	-	3	1	10	ACTGTCCATCTCTACTTTCCAACGTGGCCTAAAGGCATGATGACCTGAAAGAGA	2		0	+	NM_021492	541	GAAGAATGTGGCCTGTAAGAACATAGAGGTGAAGAAGCTTGTCTACGTGTATCT	Ap3b2
SRR029642.16108751	-	3	1	8	CTACTGTCCATCTCTACTTTCCAACGTGGCCTAAAGGCATGATGACCTGAAAGA	2		0	+	NM_021492	526	GTTCCCTGCAGTGGTGAAGAATGTGGCCTGTAAGAACATAGAGGTGAAGAAGCT	Ap3b2
SRR029642.2811596	+	3	1	10	ACTGTCCATCTCTACTTTCCAACGTGGCCTAAAGGCATGATGACCTGAAAGAGA	2		0	-	NM_021492	490	GGCAATGATCGCCCGGGGAAAGAATGCCTCGGACCTGTTCCCTGCAGTGGTGAA	Ap3b2
SRR029642.9441367	+	3	1	19	CTCTACTTTCCAACGTGGCCTAAAGGCATGATGACCTGAAAGAGATGTTGGACA	2		0	-	NM_021492	490	GGCAATGATCGCCCGGGGAAAGAATGCCTCGGACCTGTTCCCTGCAGTGGTGAA	Ap3b2
SRR029642.12872739	+	3	1	15	CCATCTCTACTTTCCAACGTGGCCTAAAGGCATGATGACCTGAAAGAGATGTTG	2		0	-	NM_021492	490	GGCAATGATCGCCCGGGGAAAGAATGCCTCGGACCTGTTCCCTGCAGTGGTGAA	Ap3b2
SRR029642.12872739	+	3	1	15	CCATCTCTACTTTCCAACGTGGCCTAAAGGCATGATGACCTGAAAGAGATGTTG	2		0	-	NM_021492	491	GCAATGATCGCCCGGGGAAAGAATGCCTCGGACCTGTTCCCTGCAGTGGTGAAG	Ap3b2
SRR029642.14645564	+	3	1	10	ACTGTCCATCTCTACTTTCCAACGTGGCCTAAAGGCATGATGACCTGAAAGAGA	2		0	-	NM_021492	491	GCAATGATCGCCCGGGGAAAGAATGCCTCGGACCTGTTCCCTGCAGTGGTGAAG	Ap3b2
SRR029642.2811596	+	3	1	10	ACTGTCCATCTCTACTTTCCAACGTGGCCTAAAGGCATGATGACCTGAAAGAGA	2		0	-	NM_021492	486	TTGTGGCAATGATCGCCCGGGGAAAGAATGCCTCGGACCTGTTCCCTGCAGTGG	Ap3b2
SRR029642.9441367	+	3	1	19	CTCTACTTTCCAACGTGGCCTAAAGGCATGATGACCTGAAAGAGATGTTGGACA	2		0	-	NM_021492	486	TTGTGGCAATGATCGCCCGGGGAAAGAATGCCTCGGACCTGTTCCCTGCAGTGG	Ap3b2
SRR029642.12872739	+	3	1	15	CCATCTCTACTTTCCAACGTGGCCTAAAGGCATGATGACCTGAAAGAGATGTTG	2		0	-	NM_021492	486	TTGTGGCAATGATCGCCCGGGGAAAGAATGCCTCGGACCTGTTCCCTGCAGTGG	Ap3b2
SRR029642.14645564	+	3	1	10	ACTGTCCATCTCTACTTTCCAACGTGGCCTAAAGGCATGATGACCTGAAAGAGA	2		0	-	NM_021492	486	TTGTGGCAATGATCGCCCGGGGAAAGAATGCCTCGGACCTGTTCCCTGCAGTGG	Ap3b2
SRR029642.1622024	-	3	1	20	TTAGATGGTTACTTCAGCCGAGTGGTTCCAGCTACGGTCATCCAGTGCCATAAC	2	45:G>T	1	+	NM_021710	595	ACCGGCAATATGCAGCTCTCTTTGTTGTGGTTGGAGTTAATGACAATGAGAATG	Ap4s1
SRR029642.11569319	+	9	8	18	TGGGGCGTGGGCCGAGACAACGGCCGTGTTTTGCTGTGCGTTTTCTGGGCTGGG	2	42:C>T	0	-	NM_001201415	1831	GCTGTCAACAACTGCATCCGACAGCTTTCCTACTGCAAAAACGACATCCGGGAC	Apbb2
SRR029642.12166398	-	22	21	19	TAATAATTACGGGGAGATATTTGAGATACACAAGATGAAAAGGAGAGAACTAGC	2	42:T>G	0	+	NM_178407	4194	ATGAATGCCCATAACTTGGCAATGGTCTTTTCATCCTGCTTATTTCAAACTAAG	Arap2
SRR029642.14617039	+	5	2	33	TCTCCTCAAGGCTATTTCCGTGNCAGAAGAAGTAATACTACCTCAGCTGGAAAG	2	22:A>N	2	-	NM_178407	3258	AATATCAGTGAGTTTATCTGCCTGGCTGTCCATAAGGAGGACTTCTATCTGAAT	Arap2
SRR029642.13870743	+	8	2	7	AAGGGGCAACAGTGTGTGGCTTTGCAAAAATGAACAGCTATTTCCGTGACAGAA	2		2	-	NM_178407	3258	AATATCAGTGAGTTTATCTGCCTGGCTGTCCATAAGGAGGACTTCTATCTGAAT	Arap2
SRR029642.13870743	+	8	2	7	AAGGGGCAACAGTGTGTGGCTTTGCAAAAATGAACAGCTATTTCCGTGACAGAA	2		0	-	NM_178407	1395	GATAATTCAACTTCCATCTTTCCTTACGGAGAGACATTTCTCTTCCAGAGACTA	Arap2
SRR029642.14617039	+	5	2	33	TCTCCTCAAGGCTATTTCCGTGNCAGAAGAAGTAATACTACCTCAGCTGGAAAG	2	22:A>N	0	-	NM_178407	1395	GATAATTCAACTTCCATCTTTCCTTACGGAGAGACATTTCTCTTCCAGAGACTA	Arap2
SRR029642.13870743	+	8	2	7	AAGGGGCAACAGTGTGTGGCTTTGCAAAAATGAACAGCTATTTCCGTGACAGAA	2		0	-	NM_178407	4443	AGTATTATAATCCGGATATCTCCTGTGATGGAAGCTGAAGAGTTAACGAATGAT	Arap2
SRR029642.14617039	+	5	2	33	TCTCCTCAAGGCTATTTCCGTGNCAGAAGAAGTAATACTACCTCAGCTGGAAAG	2	22:A>N	0	-	NM_178407	4443	AGTATTATAATCCGGATATCTCCTGTGATGGAAGCTGAAGAGTTAACGAATGAT	Arap2
SRR029642.13870743	+	8	2	7	AAGGGGCAACAGTGTGTGGCTTTGCAAAAATGAACAGCTATTTCCGTGACAGAA	2		0	-	NM_178407	1414	TTCCTTACGGAGAGACATTTCTCTTCCAGAGACTAGAAAGTTCCAAGAAGCGAT	Arap2
SRR029642.14617039	+	5	2	33	TCTCCTCAAGGCTATTTCCGTGNCAGAAGAAGTAATACTACCTCAGCTGGAAAG	2	22:A>N	0	-	NM_178407	1414	TTCCTTACGGAGAGACATTTCTCTTCCAGAGACTAGAAAGTTCCAAGAAGCGAT	Arap2
SRR029642.6466902	-	5	3	32	GGCCTTCGGGGGAAACTCATCGCATATGGACACATCACTGGCAATGCCCCTGAC	2	45:A>G,53:A>G	0	+	NM_001085495	903	AGAGTGGCCTAGGAAAAGTGAGCTTGGAAAATGGAGAAGCTCCCCGAGAGAGAG	Arfgef2
SRR029642.6466902	-	5	3	32	GGCCTTCGGGGGAAACTCATCGCATATGGACACATCACTGGCAATGCCCCTGAC	2	45:A>G,53:A>G	0	+	NM_001085495	889	TGGGGACCATGCCCAGAGTGGCCTAGGAAAAGTGAGCTTGGAAAATGGAGAAGC	Arfgef2
SRR029642.16745471	+	11	1	2	TCCACACGTTTAACAGAGCCATTGTCCCGAGACCGGCAGGAGGTCTGTCAGCTG	2	36:A>C	2	-	NM_030113	337	AGCGGCGATGCGGAGACTGACGATGAACGGTGCATAGATGCCTCCTTACGGGAA	Arhgap10
SRR029642.1920348	-	11	8	13	AACAGAGCCATTCTCCCGAGACCGGGAGGAGGGCCTGCTCCATTTGGGTCCAGT	2	28:A>G,41:G>C	1	+	NM_030113	1161	TGGCGTCCCCTTGACCGTGCAGGCGTTTTCAGAAGAAGAGAGGAAGCAGGGGTT	Arhgap10
SRR029642.4652277	-	17	15	0	TTCAGAATATCGTTGTAGAAATCTTAATTGAAAACCATGAAAAGGAGTCTTCCA	2		0	+	NM_030113	1143	CGAAGCTGCTGACAGGCCTGGCGTCCCCTTGACCGTGCAGGCGTTTTCAGAAGA	Arhgap10
SRR029642.4652277	-	17	15	0	TTCAGAATATCGTTGTAGAAATCTTAATTGAAAACCATGAAAAGGAGTCTTCCA	2		1	+	NM_030113	1161	TGGCGTCCCCTTGACCGTGCAGGCGTTTTCAGAAGAAGAGAGGAAGCAGGGGTT	Arhgap10
SRR029642.18276326	+	2	1	21	TGGAAGAACAGAGAGAAATCATGGTCTGTCAGCTGCCCAGAGGAAGTTCGCTCA	2		0	-	NM_030113	1045	AGATCTGGGGGGAAACTGGGGGATGGCGAGGCTTTCTTTTTGAAAGAATGCACC	Arhgap10
SRR029642.17356717	+	19	16	18	AGCTGTGGAGATGCCACCGCCACCACAGAGCGGCAGCCCGTAATCCCCAGTTAA	2	40:G>T,47:G>C	1	-	NM_030113	1643	AGGAGATGTTGGATATCTTGGTGAAGCATCTAACCAACGGGTCAAGTCACTCGA	Arhgap10
SRR029642.18276326	+	2	1	21	TGGAAGAACAGAGAGAAATCATGGTCTGTCAGCTGCCCAGAGGAAGTTCGCTCA	2		1	-	NM_030113	1643	AGGAGATGTTGGATATCTTGGTGAAGCATCTAACCAACGGGTCAAGTCACTCGA	Arhgap10
SRR029642.18276326	+	2	1	21	TGGAAGAACAGAGAGAAATCATGGTCTGTCAGCTGCCCAGAGGAAGTTCGCTCA	2		1	-	NM_030113	1511	TGAGGAGTCTTCCAGAGCCTCTCATGACCTATGAGTGACACAGAGACTTCATTG	Arhgap10
SRR029642.16745471	+	11	1	2	TCCACACGTTTAACAGAGCCATTGTCCCGAGACCGGCAGGAGGTCTGTCAGCTG	2	36:A>C	1	-	NM_030113	1511	TGAGGAGTCTTCCAGAGCCTCTCATGACCTATGAGTGACACAGAGACTTCATTG	Arhgap10
SRR029642.16745471	+	11	1	2	TCCACACGTTTAACAGAGCCATTGTCCCGAGACCGGCAGGAGGTCTGTCAGCTG	2	36:A>C	1	-	NM_030113	1643	AGGAGATGTTGGATATCTTGGTGAAGCATCTAACCAACGGGTCAAGTCACTCGA	Arhgap10
SRR029642.1920348	-	11	8	13	AACAGAGCCATTCTCCCGAGACCGGGAGGAGGGCCTGCTCCATTTGGGTCCAGT	2	28:A>G,41:G>C	0	+	NM_030113	1143	CGAAGCTGCTGACAGGCCTGGCGTCCCCTTGACCGTGCAGGCGTTTTCAGAAGA	Arhgap10
SRR029642.17356717	+	19	16	18	AGCTGTGGAGATGCCACCGCCACCACAGAGCGGCAGCCCGTAATCCCCAGTTAA	2	40:G>T,47:G>C	1	-	NM_030113	1511	TGAGGAGTCTTCCAGAGCCTCTCATGACCTATGAGTGACACAGAGACTTCATTG	Arhgap10
SRR029642.16745471	+	11	1	2	TCCACACGTTTAACAGAGCCATTGTCCCGAGACCGGCAGGAGGTCTGTCAGCTG	2	36:A>C	0	-	NM_030113	359	ATGAACGGTGCATAGATGCCTCCTTACGGGAATTTTCTAACTTTCTGAAGAATC	Arhgap10
SRR029642.17356717	+	19	16	18	AGCTGTGGAGATGCCACCGCCACCACAGAGCGGCAGCCCGTAATCCCCAGTTAA	2	40:G>T,47:G>C	0	-	NM_030113	359	ATGAACGGTGCATAGATGCCTCCTTACGGGAATTTTCTAACTTTCTGAAGAATC	Arhgap10
SRR029642.18276326	+	2	1	21	TGGAAGAACAGAGAGAAATCATGGTCTGTCAGCTGCCCAGAGGAAGTTCGCTCA	2		0	-	NM_030113	359	ATGAACGGTGCATAGATGCCTCCTTACGGGAATTTTCTAACTTTCTGAAGAATC	Arhgap10
SRR029642.17356717	+	19	16	18	AGCTGTGGAGATGCCACCGCCACCACAGAGCGGCAGCCCGTAATCCCCAGTTAA	2	40:G>T,47:G>C	2	-	NM_030113	337	AGCGGCGATGCGGAGACTGACGATGAACGGTGCATAGATGCCTCCTTACGGGAA	Arhgap10
SRR029642.16745471	+	11	1	2	TCCACACGTTTAACAGAGCCATTGTCCCGAGACCGGCAGGAGGTCTGTCAGCTG	2	36:A>C	0	-	NM_030113	1045	AGATCTGGGGGGAAACTGGGGGATGGCGAGGCTTTCTTTTTGAAAGAATGCACC	Arhgap10
SRR029642.16745471	+	11	1	2	TCCACACGTTTAACAGAGCCATTGTCCCGAGACCGGCAGGAGGTCTGTCAGCTG	2	36:A>C	0	-	NM_030113	1525	GAGCCTCTCATGACCTATGAGTTACACAGAGACTTCATTGTTCCAGCCAAGAGC	Arhgap10
SRR029642.17356717	+	19	16	18	AGCTGTGGAGATGCCACCGCCACCACAGAGCGGCAGCCCGTAATCCCCAGTTAA	2	40:G>T,47:G>C	0	-	NM_030113	1525	GAGCCTCTCATGACCTATGAGTTACACAGAGACTTCATTGTTCCAGCCAAGAGC	Arhgap10
SRR029642.18276326	+	2	1	21	TGGAAGAACAGAGAGAAATCATGGTCTGTCAGCTGCCCAGAGGAAGTTCGCTCA	2		0	-	NM_030113	1525	GAGCCTCTCATGACCTATGAGTTACACAGAGACTTCATTGTTCCAGCCAAGAGC	Arhgap10
SRR029642.17356717	+	19	16	18	AGCTGTGGAGATGCCACCGCCACCACAGAGCGGCAGCCCGTAATCCCCAGTTAA	2	40:G>T,47:G>C	0	-	NM_030113	1045	AGATCTGGGGGGAAACTGGGGGATGGCGAGGCTTTCTTTTTGAAAGAATGCACC	Arhgap10
SRR029642.18276326	+	2	1	21	TGGAAGAACAGAGAGAAATCATGGTCTGTCAGCTGCCCAGAGGAAGTTCGCTCA	2		2	-	NM_030113	337	AGCGGCGATGCGGAGACTGACGATGAACGGTGCATAGATGCCTCCTTACGGGAA	Arhgap10
SRR029642.11405419	-	1	1	32	GAGCAGATGAGGGTTTAAATGAAACACCAGATGTTTACAGCCTTCCAAGTGTTA	2		0	+	NM_001039692	976	AGCTTCTCTCAGGAACAGTCATGTGACTCAGCTGGAGAAGGCTCCGAAAGAATA	Arhgap12
SRR029642.7014834	-	2	1	16	GAGCAGCAGCTCCACTGAGCAGATGAGGGTTTAAATGAAACACCAGATGTTTAC	2	53:T>G	0	+	NM_029277	968	AGAAAACTAGCTTCTCTCAGGAACAGTCATGTGACTCAGCTGGAGAAGGCTCCG	Arhgap12
SRR029642.7014834	-	2	1	16	GAGCAGCAGCTCCACTGAGCAGATGAGGGTTTAAATGAAACACCAGATGTTTAC	2	53:T>G	2	+	NM_029277	1231	AGTTCAGGCCGTTGTTACTACTATAACCGCACACCCCCGGAGCGAACCTGGAAA	Arhgap12
SRR029642.2548280	-	5	3	1	GGAGCTCAGTGTAATGCCCAAGGATGAAGACATTCTCTAAGTGGAAAGCAAAGG	2	16:C>T	0	+	NM_001128084	686	ACAGGTGACAGAATTATAAAAGTCAATGGAGAAAGTGTCATAGGAAAGACCTAT	Arhgap21
SRR029642.3521047	-	5	1	33	TTGTAGAGCCTATTTGTCTTCGGCAAAGCGGAAGTTTGCAGATTCCTTAAATGA	2		1	+	NM_175164	601	GCTGCTGTTCCCAGGAATCTTGAAGACGAGCGGAGTCGAATGATCGAGAATGCC	Arhgap26
SRR029642.19917834	-	3	1	30	TTGGGGCCGCCAGGATTTGTCTTCGGCAAAGCGGAAGTGTGCAGATTCCTTAAA	2	15:T>G	0	+	NM_175164	1902	TGTGGCAAACCTGGGCGTGGTGTTTGGACCCACCTTGCTTCGGCCTCAGGAAGA	Arhgap26
SRR029642.6530973	-	16	12	3	AATCGGCAGATGTTGCAGCTGCTCATGAACCACCTGGCCAACCGCACAATTGGA	2		1	+	NM_175164	601	GCTGCTGTTCCCAGGAATCTTGAAGACGAGCGGAGTCGAATGATCGAGAATGCC	Arhgap26
SRR029642.19558386	-	3	1	28	GATTGGGGCCGCCAGGATTTGTCTTCGGCAAAGCGGAAGTTTGCAGATTCCTTA	2		0	+	NM_175164	1902	TGTGGCAAACCTGGGCGTGGTGTTTGGACCCACCTTGCTTCGGCCTCAGGAAGA	Arhgap26
SRR029642.19917834	-	3	1	30	TTGGGGCCGCCAGGATTTGTCTTCGGCAAAGCGGAAGTGTGCAGATTCCTTAAA	2	15:T>G	1	+	NM_175164	601	GCTGCTGTTCCCAGGAATCTTGAAGACGAGCGGAGTCGAATGATCGAGAATGCC	Arhgap26
SRR029642.11477603	-	17	12	20	ATCTTAATCGAGAACCATGAGAAGCCGCACAATTGGACAGTATCGGCTTCAGCA	2		0	+	NM_175164	1902	TGTGGCAAACCTGGGCGTGGTGTTTGGACCCACCTTGCTTCGGCCTCAGGAAGA	Arhgap26
SRR029642.19558386	-	3	1	28	GATTGGGGCCGCCAGGATTTGTCTTCGGCAAAGCGGAAGTTTGCAGATTCCTTA	2		1	+	NM_175164	601	GCTGCTGTTCCCAGGAATCTTGAAGACGAGCGGAGTCGAATGATCGAGAATGCC	Arhgap26
SRR029642.8661068	-	17	12	20	ATCTTAATCGAGAACCATGAGAAGCCGCACAATTGGACAGTATCGGCTTCAGCA	2		0	+	NM_175164	1902	TGTGGCAAACCTGGGCGTGGTGTTTGGACCCACCTTGCTTCGGCCTCAGGAAGA	Arhgap26
SRR029642.11477603	-	17	12	20	ATCTTAATCGAGAACCATGAGAAGCCGCACAATTGGACAGTATCGGCTTCAGCA	2		1	+	NM_175164	601	GCTGCTGTTCCCAGGAATCTTGAAGACGAGCGGAGTCGAATGATCGAGAATGCC	Arhgap26
SRR029642.7077490	-	16	12	9	CAGATTTTGCAGCTGCTCATGAACCACCTGGCCAACCGCACAATTGGACAGTAT	2	48:G>T	0	+	NM_175164	1902	TGTGGCAAACCTGGGCGTGGTGTTTGGACCCACCTTGCTTCGGCCTCAGGAAGA	Arhgap26
SRR029642.8661068	-	17	12	20	ATCTTAATCGAGAACCATGAGAAGCCGCACAATTGGACAGTATCGGCTTCAGCA	2		1	+	NM_175164	601	GCTGCTGTTCCCAGGAATCTTGAAGACGAGCGGAGTCGAATGATCGAGAATGCC	Arhgap26
SRR029642.6530973	-	16	12	3	AATCGGCAGATGTTGCAGCTGCTCATGAACCACCTGGCCAACCGCACAATTGGA	2		0	+	NM_175164	1902	TGTGGCAAACCTGGGCGTGGTGTTTGGACCCACCTTGCTTCGGCCTCAGGAAGA	Arhgap26
SRR029642.6530973	-	16	12	3	AATCGGCAGATGTTGCAGCTGCTCATGAACCACCTGGCCAACCGCACAATTGGA	2		0	+	NM_175164	602	CTGCTGTTCTCAGGAATCTTGAAGACGAGCGGAGTCGAATGATCGAGAATGCCA	Arhgap26
SRR029642.3521047	-	5	1	33	TTGTAGAGCCTATTTGTCTTCGGCAAAGCGGAAGTTTGCAGATTCCTTAAATGA	2		0	+	NM_175164	1902	TGTGGCAAACCTGGGCGTGGTGTTTGGACCCACCTTGCTTCGGCCTCAGGAAGA	Arhgap26
SRR029642.3521047	-	5	1	33	TTGTAGAGCCTATTTGTCTTCGGCAAAGCGGAAGTTTGCAGATTCCTTAAATGA	2		0	+	NM_175164	602	CTGCTGTTCTCAGGAATCTTGAAGACGAGCGGAGTCGAATGATCGAGAATGCCA	Arhgap26
SRR029642.19558386	-	3	1	28	GATTGGGGCCGCCAGGATTTGTCTTCGGCAAAGCGGAAGTTTGCAGATTCCTTA	2		0	+	NM_175164	1730	ACCAGTTTCAAAGAAGTTTCATCAAAGCAGCAAAGCTGGAAAACCAAGAGACTC	Arhgap26
SRR029642.7077490	-	16	12	9	CAGATTTTGCAGCTGCTCATGAACCACCTGGCCAACCGCACAATTGGACAGTAT	2	48:G>T	0	+	NM_175164	602	CTGCTGTTCTCAGGAATCTTGAAGACGAGCGGAGTCGAATGATCGAGAATGCCA	Arhgap26
SRR029642.11477603	-	17	12	20	ATCTTAATCGAGAACCATGAGAAGCCGCACAATTGGACAGTATCGGCTTCAGCA	2		0	+	NM_175164	1730	ACCAGTTTCAAAGAAGTTTCATCAAAGCAGCAAAGCTGGAAAACCAAGAGACTC	Arhgap26
SRR029642.19917834	-	3	1	30	TTGGGGCCGCCAGGATTTGTCTTCGGCAAAGCGGAAGTGTGCAGATTCCTTAAA	2	15:T>G	0	+	NM_175164	602	CTGCTGTTCTCAGGAATCTTGAAGACGAGCGGAGTCGAATGATCGAGAATGCCA	Arhgap26
SRR029642.8661068	-	17	12	20	ATCTTAATCGAGAACCATGAGAAGCCGCACAATTGGACAGTATCGGCTTCAGCA	2		0	+	NM_175164	1730	ACCAGTTTCAAAGAAGTTTCATCAAAGCAGCAAAGCTGGAAAACCAAGAGACTC	Arhgap26
SRR029642.19558386	-	3	1	28	GATTGGGGCCGCCAGGATTTGTCTTCGGCAAAGCGGAAGTTTGCAGATTCCTTA	2		0	+	NM_175164	602	CTGCTGTTCTCAGGAATCTTGAAGACGAGCGGAGTCGAATGATCGAGAATGCCA	Arhgap26
SRR029642.7077490	-	16	12	9	CAGATTTTGCAGCTGCTCATGAACCACCTGGCCAACCGCACAATTGGACAGTAT	2	48:G>T	0	+	NM_175164	1730	ACCAGTTTCAAAGAAGTTTCATCAAAGCAGCAAAGCTGGAAAACCAAGAGACTC	Arhgap26
SRR029642.11477603	-	17	12	20	ATCTTAATCGAGAACCATGAGAAGCCGCACAATTGGACAGTATCGGCTTCAGCA	2		0	+	NM_175164	602	CTGCTGTTCTCAGGAATCTTGAAGACGAGCGGAGTCGAATGATCGAGAATGCCA	Arhgap26
SRR029642.6530973	-	16	12	3	AATCGGCAGATGTTGCAGCTGCTCATGAACCACCTGGCCAACCGCACAATTGGA	2		0	+	NM_175164	1730	ACCAGTTTCAAAGAAGTTTCATCAAAGCAGCAAAGCTGGAAAACCAAGAGACTC	Arhgap26
SRR029642.8661068	-	17	12	20	ATCTTAATCGAGAACCATGAGAAGCCGCACAATTGGACAGTATCGGCTTCAGCA	2		0	+	NM_175164	602	CTGCTGTTCTCAGGAATCTTGAAGACGAGCGGAGTCGAATGATCGAGAATGCCA	Arhgap26
SRR029642.3521047	-	5	1	33	TTGTAGAGCCTATTTGTCTTCGGCAAAGCGGAAGTTTGCAGATTCCTTAAATGA	2		0	+	NM_175164	1730	ACCAGTTTCAAAGAAGTTTCATCAAAGCAGCAAAGCTGGAAAACCAAGAGACTC	Arhgap26
SRR029642.7077490	-	16	12	9	CAGATTTTGCAGCTGCTCATGAACCACCTGGCCAACCGCACAATTGGACAGTAT	2	48:G>T	1	+	NM_175164	601	GCTGCTGTTCCCAGGAATCTTGAAGACGAGCGGAGTCGAATGATCGAGAATGCC	Arhgap26
SRR029642.19917834	-	3	1	30	TTGGGGCCGCCAGGATTTGTCTTCGGCAAAGCGGAAGTGTGCAGATTCCTTAAA	2	15:T>G	0	+	NM_175164	1730	ACCAGTTTCAAAGAAGTTTCATCAAAGCAGCAAAGCTGGAAAACCAAGAGACTC	Arhgap26
SRR029642.19917834	-	3	1	30	TTGGGGCCGCCAGGATTTGTCTTCGGCAAAGCGGAAGTGTGCAGATTCCTTAAA	2	15:T>G	0	+	NM_175164	1740	AAGAAGTTTCATCAAAGCAGCAAAGCTGGAAAACCAAGAGACTCGAGTGTCTGA	Arhgap26
SRR029642.19558386	-	3	1	28	GATTGGGGCCGCCAGGATTTGTCTTCGGCAAAGCGGAAGTTTGCAGATTCCTTA	2		0	+	NM_175164	1740	AAGAAGTTTCATCAAAGCAGCAAAGCTGGAAAACCAAGAGACTCGAGTGTCTGA	Arhgap26
SRR029642.8661068	-	17	12	20	ATCTTAATCGAGAACCATGAGAAGCCGCACAATTGGACAGTATCGGCTTCAGCA	2		0	+	NM_175164	1740	AAGAAGTTTCATCAAAGCAGCAAAGCTGGAAAACCAAGAGACTCGAGTGTCTGA	Arhgap26
SRR029642.11477603	-	17	12	20	ATCTTAATCGAGAACCATGAGAAGCCGCACAATTGGACAGTATCGGCTTCAGCA	2		0	+	NM_175164	1740	AAGAAGTTTCATCAAAGCAGCAAAGCTGGAAAACCAAGAGACTCGAGTGTCTGA	Arhgap26
SRR029642.7077490	-	16	12	9	CAGATTTTGCAGCTGCTCATGAACCACCTGGCCAACCGCACAATTGGACAGTAT	2	48:G>T	0	+	NM_175164	1740	AAGAAGTTTCATCAAAGCAGCAAAGCTGGAAAACCAAGAGACTCGAGTGTCTGA	Arhgap26
SRR029642.6530973	-	16	12	3	AATCGGCAGATGTTGCAGCTGCTCATGAACCACCTGGCCAACCGCACAATTGGA	2		0	+	NM_175164	1740	AAGAAGTTTCATCAAAGCAGCAAAGCTGGAAAACCAAGAGACTCGAGTGTCTGA	Arhgap26
SRR029642.3521047	-	5	1	33	TTGTAGAGCCTATTTGTCTTCGGCAAAGCGGAAGTTTGCAGATTCCTTAAATGA	2		0	+	NM_175164	1740	AAGAAGTTTCATCAAAGCAGCAAAGCTGGAAAACCAAGAGACTCGAGTGTCTGA	Arhgap26
SRR029642.19917834	-	3	1	30	TTGGGGCCGCCAGGATTTGTCTTCGGCAAAGCGGAAGTGTGCAGATTCCTTAAA	2	15:T>G	0	+	NM_175164	819	AGACAGCCAAGTGGACCTGGTTCGGCAACATTTCTACGAAGTATCCCTGGAGTA	Arhgap26
SRR029642.19558386	-	3	1	28	GATTGGGGCCGCCAGGATTTGTCTTCGGCAAAGCGGAAGTTTGCAGATTCCTTA	2		0	+	NM_175164	819	AGACAGCCAAGTGGACCTGGTTCGGCAACATTTCTACGAAGTATCCCTGGAGTA	Arhgap26
SRR029642.11477603	-	17	12	20	ATCTTAATCGAGAACCATGAGAAGCCGCACAATTGGACAGTATCGGCTTCAGCA	2		0	+	NM_175164	819	AGACAGCCAAGTGGACCTGGTTCGGCAACATTTCTACGAAGTATCCCTGGAGTA	Arhgap26
SRR029642.8661068	-	17	12	20	ATCTTAATCGAGAACCATGAGAAGCCGCACAATTGGACAGTATCGGCTTCAGCA	2		0	+	NM_175164	819	AGACAGCCAAGTGGACCTGGTTCGGCAACATTTCTACGAAGTATCCCTGGAGTA	Arhgap26
SRR029642.7077490	-	16	12	9	CAGATTTTGCAGCTGCTCATGAACCACCTGGCCAACCGCACAATTGGACAGTAT	2	48:G>T	0	+	NM_175164	819	AGACAGCCAAGTGGACCTGGTTCGGCAACATTTCTACGAAGTATCCCTGGAGTA	Arhgap26
SRR029642.6530973	-	16	12	3	AATCGGCAGATGTTGCAGCTGCTCATGAACCACCTGGCCAACCGCACAATTGGA	2		0	+	NM_175164	819	AGACAGCCAAGTGGACCTGGTTCGGCAACATTTCTACGAAGTATCCCTGGAGTA	Arhgap26
SRR029642.3521047	-	5	1	33	TTGTAGAGCCTATTTGTCTTCGGCAAAGCGGAAGTTTGCAGATTCCTTAAATGA	2		0	+	NM_175164	819	AGACAGCCAAGTGGACCTGGTTCGGCAACATTTCTACGAAGTATCCCTGGAGTA	Arhgap26
SRR029642.19917834	-	3	1	30	TTGGGGCCGCCAGGATTTGTCTTCGGCAAAGCGGAAGTGTGCAGATTCCTTAAA	2	15:T>G	0	+	NM_175164	1902	TGTGGCAAACCTGGGCGTGGTGTTTGGACCCACCTTGCTTCGGCCTCAGGAAGA	Arhgap26
SRR029642.19558386	-	3	1	28	GATTGGGGCCGCCAGGATTTGTCTTCGGCAAAGCGGAAGTTTGCAGATTCCTTA	2		0	+	NM_175164	1902	TGTGGCAAACCTGGGCGTGGTGTTTGGACCCACCTTGCTTCGGCCTCAGGAAGA	Arhgap26
SRR029642.11477603	-	17	12	20	ATCTTAATCGAGAACCATGAGAAGCCGCACAATTGGACAGTATCGGCTTCAGCA	2		0	+	NM_175164	1902	TGTGGCAAACCTGGGCGTGGTGTTTGGACCCACCTTGCTTCGGCCTCAGGAAGA	Arhgap26
SRR029642.8661068	-	17	12	20	ATCTTAATCGAGAACCATGAGAAGCCGCACAATTGGACAGTATCGGCTTCAGCA	2		0	+	NM_175164	1902	TGTGGCAAACCTGGGCGTGGTGTTTGGACCCACCTTGCTTCGGCCTCAGGAAGA	Arhgap26
SRR029642.7077490	-	16	12	9	CAGATTTTGCAGCTGCTCATGAACCACCTGGCCAACCGCACAATTGGACAGTAT	2	48:G>T	0	+	NM_175164	1902	TGTGGCAAACCTGGGCGTGGTGTTTGGACCCACCTTGCTTCGGCCTCAGGAAGA	Arhgap26
SRR029642.6530973	-	16	12	3	AATCGGCAGATGTTGCAGCTGCTCATGAACCACCTGGCCAACCGCACAATTGGA	2		0	+	NM_175164	1902	TGTGGCAAACCTGGGCGTGGTGTTTGGACCCACCTTGCTTCGGCCTCAGGAAGA	Arhgap26
SRR029642.3521047	-	5	1	33	TTGTAGAGCCTATTTGTCTTCGGCAAAGCGGAAGTTTGCAGATTCCTTAAATGA	2		0	+	NM_175164	1902	TGTGGCAAACCTGGGCGTGGTGTTTGGACCCACCTTGCTTCGGCCTCAGGAAGA	Arhgap26
SRR029642.15187132	+	9	3	7	GTTCCTCAGTCAGTAACCAACTCAGTGCCAAAACCAGGTTACCCTTCACAAAGG	2		1	-	NM_001195632	574	TCGCCCAGCTCACAGAGCTTCCCCGCTCTGACGTCCTGAAGGACAGTCCTGAGT	Arhgap32
SRR029642.18718314	+	9	5	24	CAACTCAGTGCCAAAACCAGGGCAAGAGTTGGATTGTTAAAAGAAGTTATGAAG	2		1	-	NM_001195632	574	TCGCCCAGCTCACAGAGCTTCCCCGCTCTGACGTCCTGAAGGACAGTCCTGAGT	Arhgap32
SRR029642.6857839	+	9	3	2	AGAAAGTTCCTCAGTCAGTAACCAACTCAGTGCCCAAACCAGGTTACCCTTCCC	2	34:A>C,52:A>C	0	-	NM_001195632	2224	ACGTGCTGGGGAACCGGTGCAATTCCTATGACAATCTGCCCCACGACAACGAGA	Arhgap32
SRR029642.6857839	+	9	3	2	AGAAAGTTCCTCAGTCAGTAACCAACTCAGTGCCCAAACCAGGTTACCCTTCCC	2	34:A>C,52:A>C	1	-	NM_001195632	574	TCGCCCAGCTCACAGAGCTTCCCCGCTCTGACGTCCTGAAGGACAGTCCTGAGT	Arhgap32
SRR029642.14432261	+	8	5	24	GAGGCAAGCATGGATTTCAGGGCAAGAGTTGGATTGTTAAAAGAAGTTATGAAG	2		1	-	NM_001195632	374	TGAGAACGTGGAGTTTGGCAGCATNCAGCTCTCACTATCAGAAGAACAGAATGA	Arhgap32
SRR029642.15187132	+	9	3	7	GTTCCTCAGTCAGTAACCAACTCAGTGCCAAAACCAGGTTACCCTTCACAAAGG	2		1	-	NM_001195632	374	TGAGAACGTGGAGTTTGGCAGCATNCAGCTCTCACTATCAGAAGAACAGAATGA	Arhgap32
SRR029642.18718314	+	9	5	24	CAACTCAGTGCCAAAACCAGGGCAAGAGTTGGATTGTTAAAAGAAGTTATGAAG	2		0	-	NM_001195632	579	CAGCTCACAGAGCTTCCCCGCTCTGACGTCCTGAAGGACAGTCCTGAGTCGGTT	Arhgap32
SRR029642.17621982	+	9	5	24	CAACTCAGTGCCAAAACCAGGGCAAGAGTTGGATTGTTAAAAGAAGTTATGAAG	2		1	-	NM_001195632	374	TGAGAACGTGGAGTTTGGCAGCATNCAGCTCTCACTATCAGAAGAACAGAATGA	Arhgap32
SRR029642.18718314	+	9	5	24	CAACTCAGTGCCAAAACCAGGGCAAGAGTTGGATTGTTAAAAGAAGTTATGAAG	2		1	-	NM_001195632	374	TGAGAACGTGGAGTTTGGCAGCATNCAGCTCTCACTATCAGAAGAACAGAATGA	Arhgap32
SRR029642.19472244	+	9	5	21	AACCAACTCAGTGCCAAAACCAGGGCAAGAGTTGGATTGTTAAAAGAAGTTATG	2		1	-	NM_001195632	374	TGAGAACGTGGAGTTTGGCAGCATNCAGCTCTCACTATCAGAAGAACAGAATGA	Arhgap32
SRR029642.14432261	+	8	5	24	GAGGCAAGCATGGATTTCAGGGCAAGAGTTGGATTGTTAAAAGAAGTTATGAAG	2		1	-	NM_001195632	372	TATGAGAACGTGGAGTTTGGCAGCATACAGCTCTCACGATCAGAAGAACAGAAT	Arhgap32
SRR029642.17621982	+	9	5	24	CAACTCAGTGCCAAAACCAGGGCAAGAGTTGGATTGTTAAAAGAAGTTATGAAG	2		1	-	NM_001195632	372	TATGAGAACGTGGAGTTTGGCAGCATACAGCTCTCACGATCAGAAGAACAGAAT	Arhgap32
SRR029642.15187132	+	9	3	7	GTTCCTCAGTCAGTAACCAACTCAGTGCCAAAACCAGGTTACCCTTCACAAAGG	2		0	-	NM_001195632	579	CAGCTCACAGAGCTTCCCCGCTCTGACGTCCTGAAGGACAGTCCTGAGTCGGTT	Arhgap32
SRR029642.17621982	+	9	5	24	CAACTCAGTGCCAAAACCAGGGCAAGAGTTGGATTGTTAAAAGAAGTTATGAAG	2		1	-	NM_001195632	574	TCGCCCAGCTCACAGAGCTTCCCCGCTCTGACGTCCTGAAGGACAGTCCTGAGT	Arhgap32
SRR029642.19472244	+	9	5	21	AACCAACTCAGTGCCAAAACCAGGGCAAGAGTTGGATTGTTAAAAGAAGTTATG	2		1	-	NM_001195632	372	TATGAGAACGTGGAGTTTGGCAGCATACAGCTCTCACGATCAGAAGAACAGAAT	Arhgap32
SRR029642.6857839	+	9	3	2	AGAAAGTTCCTCAGTCAGTAACCAACTCAGTGCCCAAACCAGGTTACCCTTCCC	2	34:A>C,52:A>C	1	-	NM_001195632	374	TGAGAACGTGGAGTTTGGCAGCATNCAGCTCTCACTATCAGAAGAACAGAATGA	Arhgap32
SRR029642.18718314	+	9	5	24	CAACTCAGTGCCAAAACCAGGGCAAGAGTTGGATTGTTAAAAGAAGTTATGAAG	2		1	-	NM_001195632	372	TATGAGAACGTGGAGTTTGGCAGCATACAGCTCTCACGATCAGAAGAACAGAAT	Arhgap32
SRR029642.15187132	+	9	3	7	GTTCCTCAGTCAGTAACCAACTCAGTGCCAAAACCAGGTTACCCTTCACAAAGG	2		1	-	NM_001195632	372	TATGAGAACGTGGAGTTTGGCAGCATACAGCTCTCACGATCAGAAGAACAGAAT	Arhgap32
SRR029642.18718314	+	9	5	24	CAACTCAGTGCCAAAACCAGGGCAAGAGTTGGATTGTTAAAAGAAGTTATGAAG	2		0	-	NM_001195632	579	CAGCTCACAGAGCTTCCCCGCTCTGACGTCCTGAAGGACAGTCCTGAGTCGGTT	Arhgap32
SRR029642.15187132	+	9	3	7	GTTCCTCAGTCAGTAACCAACTCAGTGCCAAAACCAGGTTACCCTTCACAAAGG	2		0	-	NM_001195632	2224	ACGTGCTGGGGAACCGGTGCAATTCCTATGACAATCTGCCCCACGACAACGAGA	Arhgap32
SRR029642.10755267	+	9	3	2	AGAAAGTTCCTCAGTCAGTAACCAACTCAGTGCCAAAACCAGGTTACCCTTCAC	2		0	-	NM_001195632	579	CAGCTCACAGAGCTTCCCCGCTCTGACGTCCTGAAGGACAGTCCTGAGTCGGTT	Arhgap32
SRR029642.19472244	+	9	5	21	AACCAACTCAGTGCCAAAACCAGGGCAAGAGTTGGATTGTTAAAAGAAGTTATG	2		0	-	NM_001195632	579	CAGCTCACAGAGCTTCCCCGCTCTGACGTCCTGAAGGACAGTCCTGAGTCGGTT	Arhgap32
SRR029642.6857839	+	9	3	2	AGAAAGTTCCTCAGTCAGTAACCAACTCAGTGCCCAAACCAGGTTACCCTTCCC	2	34:A>C,52:A>C	0	-	NM_001195632	579	CAGCTCACAGAGCTTCCCCGCTCTGACGTCCTGAAGGACAGTCCTGAGTCGGTT	Arhgap32
SRR029642.17621982	+	9	5	24	CAACTCAGTGCCAAAACCAGGGCAAGAGTTGGATTGTTAAAAGAAGTTATGAAG	2		0	-	NM_001195632	579	CAGCTCACAGAGCTTCCCCGCTCTGACGTCCTGAAGGACAGTCCTGAGTCGGTT	Arhgap32
SRR029642.14432261	+	8	5	24	GAGGCAAGCATGGATTTCAGGGCAAGAGTTGGATTGTTAAAAGAAGTTATGAAG	2		0	-	NM_001195632	579	CAGCTCACAGAGCTTCCCCGCTCTGACGTCCTGAAGGACAGTCCTGAGTCGGTT	Arhgap32
SRR029642.19472244	+	9	5	21	AACCAACTCAGTGCCAAAACCAGGGCAAGAGTTGGATTGTTAAAAGAAGTTATG	2		0	-	NM_001195632	2224	ACGTGCTGGGGAACCGGTGCAATTCCTATGACAATCTGCCCCACGACAACGAGA	Arhgap32
SRR029642.10755267	+	9	3	2	AGAAAGTTCCTCAGTCAGTAACCAACTCAGTGCCAAAACCAGGTTACCCTTCAC	2		1	-	NM_001195632	372	TATGAGAACGTGGAGTTTGGCAGCATACAGCTCTCACGATCAGAAGAACAGAAT	Arhgap32
SRR029642.18718314	+	9	5	24	CAACTCAGTGCCAAAACCAGGGCAAGAGTTGGATTGTTAAAAGAAGTTATGAAG	2		0	-	NM_001195632	2224	ACGTGCTGGGGAACCGGTGCAATTCCTATGACAATCTGCCCCACGACAACGAGA	Arhgap32
SRR029642.10755267	+	9	3	2	AGAAAGTTCCTCAGTCAGTAACCAACTCAGTGCCAAAACCAGGTTACCCTTCAC	2		0	-	NM_001195632	2224	ACGTGCTGGGGAACCGGTGCAATTCCTATGACAATCTGCCCCACGACAACGAGA	Arhgap32
SRR029642.17621982	+	9	5	24	CAACTCAGTGCCAAAACCAGGGCAAGAGTTGGATTGTTAAAAGAAGTTATGAAG	2		0	-	NM_001195632	2224	ACGTGCTGGGGAACCGGTGCAATTCCTATGACAATCTGCCCCACGACAACGAGA	Arhgap32
SRR029642.17621982	+	9	5	24	CAACTCAGTGCCAAAACCAGGGCAAGAGTTGGATTGTTAAAAGAAGTTATGAAG	2		0	-	NM_001195632	579	CAGCTCACAGAGCTTCCCCGCTCTGACGTCCTGAAGGACAGTCCTGAGTCGGTT	Arhgap32
SRR029642.14432261	+	8	5	24	GAGGCAAGCATGGATTTCAGGGCAAGAGTTGGATTGTTAAAAGAAGTTATGAAG	2		0	-	NM_001195632	579	CAGCTCACAGAGCTTCCCCGCTCTGACGTCCTGAAGGACAGTCCTGAGTCGGTT	Arhgap32
SRR029642.14432261	+	8	5	24	GAGGCAAGCATGGATTTCAGGGCAAGAGTTGGATTGTTAAAAGAAGTTATGAAG	2		0	-	NM_001195632	2224	ACGTGCTGGGGAACCGGTGCAATTCCTATGACAATCTGCCCCACGACAACGAGA	Arhgap32
SRR029642.6857839	+	9	3	2	AGAAAGTTCCTCAGTCAGTAACCAACTCAGTGCCCAAACCAGGTTACCCTTCCC	2	34:A>C,52:A>C	0	-	NM_001195632	579	CAGCTCACAGAGCTTCCCCGCTCTGACGTCCTGAAGGACAGTCCTGAGTCGGTT	Arhgap32
SRR029642.15187132	+	9	3	7	GTTCCTCAGTCAGTAACCAACTCAGTGCCAAAACCAGGTTACCCTTCACAAAGG	2		0	-	NM_001195632	579	CAGCTCACAGAGCTTCCCCGCTCTGACGTCCTGAAGGACAGTCCTGAGTCGGTT	Arhgap32
SRR029642.6857839	+	9	3	2	AGAAAGTTCCTCAGTCAGTAACCAACTCAGTGCCCAAACCAGGTTACCCTTCCC	2	34:A>C,52:A>C	1	-	NM_001195632	372	TATGAGAACGTGGAGTTTGGCAGCATACAGCTCTCACGATCAGAAGAACAGAAT	Arhgap32
SRR029642.10755267	+	9	3	2	AGAAAGTTCCTCAGTCAGTAACCAACTCAGTGCCAAAACCAGGTTACCCTTCAC	2		0	-	NM_001195632	579	CAGCTCACAGAGCTTCCCCGCTCTGACGTCCTGAAGGACAGTCCTGAGTCGGTT	Arhgap32
SRR029642.10755267	+	9	3	2	AGAAAGTTCCTCAGTCAGTAACCAACTCAGTGCCAAAACCAGGTTACCCTTCAC	2		1	-	NM_001195632	374	TGAGAACGTGGAGTTTGGCAGCATNCAGCTCTCACTATCAGAAGAACAGAATGA	Arhgap32
SRR029642.10755267	+	9	3	2	AGAAAGTTCCTCAGTCAGTAACCAACTCAGTGCCAAAACCAGGTTACCCTTCAC	2		1	-	NM_001195632	574	TCGCCCAGCTCACAGAGCTTCCCCGCTCTGACGTCCTGAAGGACAGTCCTGAGT	Arhgap32
SRR029642.14432261	+	8	5	24	GAGGCAAGCATGGATTTCAGGGCAAGAGTTGGATTGTTAAAAGAAGTTATGAAG	2		1	-	NM_001195632	574	TCGCCCAGCTCACAGAGCTTCCCCGCTCTGACGTCCTGAAGGACAGTCCTGAGT	Arhgap32
SRR029642.19472244	+	9	5	21	AACCAACTCAGTGCCAAAACCAGGGCAAGAGTTGGATTGTTAAAAGAAGTTATG	2		0	-	NM_001195632	579	CAGCTCACAGAGCTTCCCCGCTCTGACGTCCTGAAGGACAGTCCTGAGTCGGTT	Arhgap32
SRR029642.19472244	+	9	5	21	AACCAACTCAGTGCCAAAACCAGGGCAAGAGTTGGATTGTTAAAAGAAGTTATG	2		1	-	NM_001195632	574	TCGCCCAGCTCACAGAGCTTCCCCGCTCTGACGTCCTGAAGGACAGTCCTGAGT	Arhgap32
SRR029642.8986564	+	1	1	13	TCAGCAGGGAGCAGAGGCCGACAAGCGATCAGGCAGAAAAGACTGAAGTTCTGA	2		2	-	NM_175003	436	GGGGAAGCAGGTGTCCCACAGCACACACNAGAAGCTCACCGCATGTCTGCAGGG	Arhgap44
SRR029642.7056973	+	26	10	13	CCCCGACTGGAGGGCATCCCCAAGATCACAGGTGGTCCGGAGACACATCCTAGG	2		0	-	NM_172415	1818	GCTGATCAAGTCCAAGGAGCGCAGGGTCTTCCTGCTCAATGACATGCTGGTCTG	Arhgef10l
SRR029642.7056973	+	26	10	13	CCCCGACTGGAGGGCATCCCCAAGATCACAGGTGGTCCGGAGACACATCCTAGG	2		0	-	NM_172415	1172	TACTCCAGGATTACCGTAACCCACTAATGGAGATGGAGCCCAAGGCGCTGAGCG	Arhgef10l
SRR029642.13591910	-	7	3	3	TCTTCTTCCTGTTTGACCACCAGATGGTCCTCTGCAAGAAGCTCTGGGTGAACC	2		1	+	NM_001033329	1347	GACTAGGAGGGAGAGGACATCTTAGACAGGAGCTCGGAGCTGATCTACACTGGA	Arhgef9
SRR029642.4554295	-	7	3	0	GTGTCTTCTTCCTGTTTGCCCACCAGATGGTCCTCTGCAAGAAGCTCTGGGTGA	2	35:A>C,52:A>T	1	+	NM_001033329	1347	GACTAGGAGGGAGAGGACATCTTAGACAGGAGCTCGGAGCTGATCTACACTGGA	Arhgef9
SRR029642.13591910	-	7	3	3	TCTTCTTCCTGTTTGACCACCAGATGGTCCTCTGCAAGAAGCTCTGGGTGAACC	2		0	+	NM_001033329	1347	GACTGGGAGGGAGAGGACATCTTAGACAGGAGCTCGGAGCTGATCTACACTGGA	Arhgef9
SRR029642.4554295	-	7	3	0	GTGTCTTCTTCCTGTTTGCCCACCAGATGGTCCTCTGCAAGAAGCTCTGGGTGA	2	35:A>C,52:A>T	0	+	NM_001033329	1347	GACTGGGAGGGAGAGGACATCTTAGACAGGAGCTCGGAGCTGATCTACACTGGA	Arhgef9
SRR029642.13020542	+	3	1	22	GTCAAGGCCCTCCAGCTTGCCTTCATCCAGTCCAATGGATCAGATGGGAAAGAT	2		0	-	NM_001080819	1847	CCCCTCAATGACCTCCAGTAAGGGAGGGCAAGAAGATATGAACCTGAGTCTTCA	Arid1a
SRR029642.8119076	-	6	2	19	GCTACAAATGTGGCCGCCAGTTTTGGTACTTTGATGGAAACCTGGAGAAGCTCT	2	50:G>A	0	+	NM_019927	805	TAACAAATAGCTTTGTAGAGTGCAACCGACTGTTAAAGTGGTGTCCTGCCCCAG	Arih1
SRR029642.1145117	-	20	12	26	CTCAAACCTCTGTGACAAATCATTGAGACTGAAACTATGATGGACCGAATTGTG	2		0	+	NM_028768	2130	ATGGAACGAAGAGGAAGGTTCACAGGAACGCCAGGATAAATTACGAGACATGGG	Armc8
SRR029642.14800531	-	8	7	31	TGGCCACCAGCAGGTGTGGTACTAGCTCCGTGGACCCTGTTTCCATGAATAGAC	2		0	+	NM_009709	946	TGAGCTTTTTGAGGAACAGATGCAGGAATGGGCTTGGCTCTGTGAAGGAAGGAG	Arnt
SRR029642.13153637	-	4	2	8	GGGAACAGCTGTGCACTTCGGAAAACTCCATGACAGAAGGGACTTCGATGACGA	2	15:T>G	0	+	NM_007488	577	TCCTGTCCTGAACCAGCCACAGTCAGAGTGGTTTGGGAGCACGCTTTATGAGCA	Arnt2
SRR029642.12087917	-	4	2	13	CAGCTGTGCACTTCGGAAAACTCCATGACAGAATGGACTTCGATGACGAAGATG	2		0	+	NM_007488	577	TCCTGTCCTGAACCAGCCACAGTCAGAGTGGTTTGGGAGCACGCTTTATGAGCA	Arnt2
SRR029642.7724710	-	4	2	5	GGAGGGAACAGCTGTGCACTTCGGAAAACTCCATGACAGAATGGACTTCGATGA	2	53:T>G	0	+	NM_007488	577	TCCTGTCCTGAACCAGCCACAGTCAGAGTGGTTTGGGAGCACGCTTTATGAGCA	Arnt2
SRR029642.13153637	-	4	2	8	GGGAACAGCTGTGCACTTCGGAAAACTCCATGACAGAAGGGACTTCGATGACGA	2	15:T>G	0	+	NM_007488	575	ACTCCTGTCCTGAACCAGCCACAGTCAGAGTGGTTTGGGAGCACGCTTTATGAG	Arnt2
SRR029642.12087917	-	4	2	13	CAGCTGTGCACTTCGGAAAACTCCATGACAGAATGGACTTCGATGACGAAGATG	2		0	+	NM_007488	575	ACTCCTGTCCTGAACCAGCCACAGTCAGAGTGGTTTGGGAGCACGCTTTATGAG	Arnt2
SRR029642.7724710	-	4	2	5	GGAGGGAACAGCTGTGCACTTCGGAAAACTCCATGACAGAATGGACTTCGATGA	2	53:T>G	0	+	NM_007488	575	ACTCCTGTCCTGAACCAGCCACAGTCAGAGTGGTTTGGGAGCACGCTTTATGAG	Arnt2
SRR029642.13153637	-	4	2	8	GGGAACAGCTGTGCACTTCGGAAAACTCCATGACAGAAGGGACTTCGATGACGA	2	15:T>G	2	+	NM_007488	564	CTGATTCGGTCACTCCTGTCCTGAACCAGCCACCGTCAGAGTGGTTTGGGGGCA	Arnt2
SRR029642.12087917	-	4	2	13	CAGCTGTGCACTTCGGAAAACTCCATGACAGAATGGACTTCGATGACGAAGATG	2		2	+	NM_007488	564	CTGATTCGGTCACTCCTGTCCTGAACCAGCCACCGTCAGAGTGGTTTGGGGGCA	Arnt2
SRR029642.7724710	-	4	2	5	GGAGGGAACAGCTGTGCACTTCGGAAAACTCCATGACAGAATGGACTTCGATGA	2	53:T>G	2	+	NM_007488	564	CTGATTCGGTCACTCCTGTCCTGAACCAGCCACCGTCAGAGTGGTTTGGGGGCA	Arnt2
SRR029642.2582940	+	4	3	1	ACAATGTTTTGCTGGCTGCAGGCTCCTGTGACTTCAAATGCAGGTATTGAATGG	2	50:C>A	0	-	NM_019767	360	CCTATGTCTGGAGTCAGAAAGATGGCATCTGGAAGCCCACCCTGGTGATCCTGA	Arpc1a
SRR029642.5175278	+	2	1	2	AAAAGGGCTACAACCGTCATAGCTAACCACCCACCGGAGAAAATCCATTTGGGC	2		0	-	NM_009712	473	AGACGAAAAACTCCTGCCCCAGCTTTTAAAGGAAGCAGGCTATGCTACGCACAT	Arsb
SRR029642.5496303	+	22	21	21	AACGATGCCTCCTGGGAGACGAGGGAGAAGTGGTTGAAGTTATATTTGTAGGCG	2		1	-	NM_018830	2444	TTCCTCACTGTGGAGAAATACGAGGACTCTGTAGCTGACGGGCAGATAATGTAT	Asah2
SRR029642.14433633	-	35	30	2	AAACCTGAGTGCAGCACTGAGGAACTGCTGTCAATTCTGAGTATGGACAACATC	2		0	+	NM_198007	5686	GAGGATAATCGCACCATTGAACCACTGACATGTGGTCGAATTGCCTCCTATTAC	Ascc3
SRR029642.1613708	+	8	6	6	GACACCAGGAAGGGCTGTGGGGATGACTGCCTAAATAGGAAAGTATCTCAGACA	2		0	-	NM_138679	6252	ACACAATCAGCTATACAAAAAGCCAGATGTCCCCCTGTATAAAAAAATCCGTTC	Ash1l
SRR029642.10063638	-	13	5	5	TACCCTCAGAGCCCACGAGCAAGATATGGCAAAGCGCAGACCTTGAAGCAGATG	2		0	+	NM_001177849	1167	AAGACAATTAAGGCTGAGCTGGATGCTGCAGAAAAGCTCCGGAAAAGGGGTAAA	Asph
SRR029642.7058660	+	15	11	23	AATATGAAGACATCAGTAAAGTGTCCTTCAGGACTCAGCCCTATGAAGGACAGC	2		1	-	NM_007495	2245	TCAACGGCGGCTGCGAACAGCTGTGTCTCCAGCAGAGGGCGCCGTTCCCAGAGG	Astn1
SRR029642.14421493	+	2	1	13	ACCTGGCCGCATTAGTCTTTTCACACTCAAGGTGTTAGAAAACTACTAAGATGC	2	47:C>A	1	-	NM_001039939	331	TGAGAAGTGGGACATCCCCTCTTGCGTGCCTCAATGCCATGCTACATTCCAACT	Asxl1
SRR029642.952222	-	5	1	24	CTCTGTACCTGCCAAACCTGGTCTTAGAAAAATACCCTAATACACCCATGAGTC	2		0	+	NM_172421	831	AACAGAAGAAGAAGCAGCAGCAATGCAGACCAAGCATGTCCATCTCCAATCAAC	Asxl2
SRR029642.17282405	-	5	1	25	CAAAAAGGCCCTGAAGCAGGCACTAGAAAAACACCCCAACTCCCCAATGACAGC	2		0	+	NM_001167777	597	CGAAGCAGGTAACGGATGAAGTATCTTCCACTCGAGATTGCAGCCTTACGAACA	Asxl3
SRR029642.7229769	-	5	1	25	CAAAAAGGCCCTGAAGCAGGCACTAGAAAAACACCCCAACTCCCCAATGACAGC	2		0	+	NM_001167777	597	CGAAGCAGGTAACGGATGAAGTATCTTCCACTCGAGATTGCAGCCTTACGAACA	Asxl3
SRR029642.1274650	-	8	1	30	AAGTGGACAGGCAGGCACTAGAAAAACACNCCAACTCCCCAATGACAGCAAAGC	2	24:C>N	0	+	NM_001167777	597	CGAAGCAGGTAACGGATGAAGTATCTTCCACTCGAGATTGCAGCCTTACGAACA	Asxl3
SRR029642.17282405	-	5	1	25	CAAAAAGGCCCTGAAGCAGGCACTAGAAAAACACCCCAACTCCCCAATGACAGC	2		0	+	NM_001167777	597	CGAAGCAGGTAACGGATGAAGTATCTTCCACTCGAGATTGCAGCCTTACGAACA	Asxl3
SRR029642.7229769	-	5	1	25	CAAAAAGGCCCTGAAGCAGGCACTAGAAAAACACCCCAACTCCCCAATGACAGC	2		0	+	NM_001167777	597	CGAAGCAGGTAACGGATGAAGTATCTTCCACTCGAGATTGCAGCCTTACGAACA	Asxl3
SRR029642.1274650	-	8	1	30	AAGTGGACAGGCAGGCACTAGAAAAACACNCCAACTCCCCAATGACAGCAAAGC	2	24:C>N	0	+	NM_001167777	597	CGAAGCAGGTAACGGATGAAGTATCTTCCACTCGAGATTGCAGCCTTACGAACA	Asxl3
SRR029642.17282405	-	5	1	25	CAAAAAGGCCCTGAAGCAGGCACTAGAAAAACACCCCAACTCCCCAATGACAGC	2		1	+	NM_001167777	1008	TTGTCAACACTAACCTGAGGGCACTAATCAACAAGCACACCTTTGCCNCCTTCC	Asxl3
SRR029642.7229769	-	5	1	25	CAAAAAGGCCCTGAAGCAGGCACTAGAAAAACACCCCAACTCCCCAATGACAGC	2		1	+	NM_001167777	1008	TTGTCAACACTAACCTGAGGGCACTAATCAACAAGCACACCTTTGCCNCCTTCC	Asxl3
SRR029642.1274650	-	8	1	30	AAGTGGACAGGCAGGCACTAGAAAAACACNCCAACTCCCCAATGACAGCAAAGC	2	24:C>N	1	+	NM_001167777	1008	TTGTCAACACTAACCTGAGGGCACTAATCAACAAGCACACCTTTGCCNCCTTCC	Asxl3
SRR029642.8158865	-	8	1	4	TCTGTGTCAGGGAATATGTCAATTCTACATCAGAAGAGAGGTTAACAATCAAGA	2		0	+	NM_026487	882	TAGACACGTAGATCTTCTAGAAGTTGCCCAGGAAACTGATGGATTTTCAGGAAG	Atad1
SRR029642.14437079	-	6	5	23	GTGGACAAAGTGACAGCTACGCCACTGTGGAGCGCGAGATGGAGCTGAGGCATA	2	52:G>T,53:T>G	1	+	NM_179203	707	ATCATCCGGGAACAGATTCGACTCAAGGCTGCTGAGCACCGCCAGACCCTCTTG	Atad3a
SRR029642.2467695	-	6	5	23	TGGGACAAAGTGACAGCTACGCCACTGTGGAGCGCGAGATGGAGCTGAGGCATA	2		1	+	NM_179203	707	ATCATCCGGGAACAGATTCGACTCAAGGCTGCTGAGCACCGCCAGACCCTCTTG	Atad3a
SRR029642.14437079	-	6	5	23	GTGGACAAAGTGACAGCTACGCCACTGTGGAGCGCGAGATGGAGCTGAGGCATA	2	52:G>T,53:T>G	0	+	NM_179203	717	AACAGATTCGACTCAAGGCTGCTGAGCACCGCCAGACCATCTTGGAGTCTATCA	Atad3a
SRR029642.2467695	-	6	5	23	TGGGACAAAGTGACAGCTACGCCACTGTGGAGCGCGAGATGGAGCTGAGGCATA	2		0	+	NM_179203	717	AACAGATTCGACTCAAGGCTGCTGAGCACCGCCAGACCATCTTGGAGTCTATCA	Atad3a
SRR029642.14437079	-	6	5	23	GTGGACAAAGTGACAGCTACGCCACTGTGGAGCGCGAGATGGAGCTGAGGCATA	2	52:G>T,53:T>G	0	+	NM_179203	717	AACAGATTCGACTCAAGGCTGCTGAGCACCGCCAGACCATCTTGGAGTCTATCA	Atad3a
SRR029642.2467695	-	6	5	23	TGGGACAAAGTGACAGCTACGCCACTGTGGAGCGCGAGATGGAGCTGAGGCATA	2		0	+	NM_179203	717	AACAGATTCGACTCAAGGCTGCTGAGCACCGCCAGACCATCTTGGAGTCTATCA	Atad3a
SRR029642.1444588	-	5	2	7	CTCAACTAAGAAGAGAAATACGACTGATGAAAAACAGGTGTCATCGTTATCAGA	2		0	+	NM_007497	759	ACCAGATCCGTACCACGCCGTCTGCCACGTCTCTCCCGCAGACCGTGGTGATGA	Atf1
SRR029642.11522403	+	9	5	19	TGTGCATGTTCCAGCTGCAGTCCCACGTTTTACCAACGAGGATCATTTGGCTGT	2		0	-	NM_001025093	528	AGCACGTAATGACAGTGTCATTGTGGCTGATCAGACTCCAACGCCAACAAGATT	Atf2
SRR029642.6686050	+	4	1	19	ATGCACTGCCCCTGGGTGTGGCCAGAGATACTAGATGGCAACTTGGGAAGTATT	2		0	-	NM_001025093	528	AGCACGTAATGACAGTGTCATTGTGGCTGATCAGACTCCAACGCCAACAAGATT	Atf2
SRR029642.14448250	-	13	9	33	CATTTCGAAGGCATGCTGGAGCAAGAATCCCGAAGAGTGAAACCTAGTGTGAGC	2		0	+	NM_001081304	1641	TGGGAGTGAGCTGCAAGTGTATTACGCCTCCCCTGGAAGTTACCAAGGCTTCTT	Atf6
SRR029642.20514869	-	8	3	5	AAGTCGCTACCAACCCAAACTTTGATGGGAAACTAAAAGGAATCTGTTGATTGG	2		0	+	NM_178628	1113	CAAGGTCTCAGGGAACCAGCATGAAGAGCTGCAGAACGTCAGGAAGCACATCCA	Atl1
SRR029642.11758285	-	3	1	12	GACAGCCTTGCATCCTTGTGAAAATGAACAGAGTCTGATCTTGCTCTTCTACTT	2	1:C>T	0	+	NM_007502	547	ATTCAGCATGGTCCTGACTATAGGGCATGTCAGTTTCCAGTCTCCTTGCTTGAA	Atp1b3
SRR029642.13642337	+	3	1	2	TATTCCAAAGGACAGCCTTGCATCCTTGTGAAAATGAACAGAGTCTGATCTTGC	2		0	-	NM_007502	319	TGGGCCATGCTCCAGACTCTGAATGATGAAGTTCCGAAATATCGAGACCAGATT	Atp1b3
SRR029642.15710328	-	21	3	14	CTTGGTGGATGATGATTTCCAAACCATCATGCTGATCTTCAGAATGGCTTAAAC	2		0	+	NM_175025	2339	TGATGCAGTTGCTCTCAAGGCTGCAGACATTGGAGTTGCGATGGGCCAGACTGG	Atp2c1
SRR029642.11928099	-	7	3	32	GGCTGCTGCTCTCTCTGTATGAGAAGGCTGATATTAAGGCACCTGAGGACAAGA	2		0	+	NM_020615	887	AGCAAGAACGCTTCTGATATGATTGACAAATTGACCTTGACTTTCAACCGCACC	Atp5c1
SRR029642.11928099	-	7	3	32	GGCTGCTGCTCTCTCTGTATGAGAAGGCTGATATTAAGGCACCTGAGGACAAGA	2		0	+	NM_020615	905	ATGATTGACAAATTGACCTTGACTTTCAACCGCACCCGCCAGGCTGTCATCACA	Atp5c1
SRR029642.7883955	+	7	3	6	AAGGAGTTGATTGAAATCATCTCTGGGGCTGCTGCTCTCTCTGTATGAGAAGGC	2		0	-	NM_020615	732	TTGCGACTGCTGAGACCATGAGCATCTATGATGACATTGATGCTGATGTGCTGC	Atp5c1
SRR029642.7883955	+	7	3	6	AAGGAGTTGATTGAAATCATCTCTGGGGCTGCTGCTCTCTCTGTATGAGAAGGC	2		1	-	NM_020615	386	ATTAGTGTGTCCTCAGATAGAGGGCTTTGTGGTGCTATTCACTCCTCAGTGGCT	Atp5c1
SRR029642.9748922	-	4	3	13	AGAAGTGCCATGCACAGTGACCACAGCATCTCAACTCCTGAAGGACCCCAAAGT	2		0	+	NM_138597	378	TCCCCGCTGACGGCCAACCTCATGAATTTACTTGCTGAAAATGGTCGCCTAGGC	Atp5o
SRR029642.3766158	+	7	6	17	AGAAATGGTAGTACCAAGGTCAAGCAAGGGAAGTTTGCTAACGCGAAGCCTGGC	2		1	-	NM_025494	761	ACATTTCTGGTGGTAGTTCCCAAGCTGAACCACAATGACTGGATTAAGCAGTAT	Atp6v1c1
SRR029642.1392475	+	7	4	13	TTGCCTGGGTAGAAGCAGATGGAGTGAACTGGAAAATCACCAGCGTGTCAGCAT	2		1	-	NM_133826	511	TTACTTCCTGCCAATGTTGAATCGCCAGGATCCCTTTACTGTTCATATGGCAGC	Atp6v1h
SRR029642.1392475	+	7	4	13	TTGCCTGGGTAGAAGCAGATGGAGTGAACTGGAAAATCACCAGCGTGTCAGCAT	2		0	-	NM_133826	779	TACCGGTTTGCCTGGGTAGAAGCAGATGGAGTGAACTGTATAATGGGCGTTTTG	Atp6v1h
SRR029642.627177	+	4	2	20	GTTAAAGATGCCACCGATGACTATAAGAAGAGCGGAGGGCGCGGGCTAACGACC	2		2	-	NM_001081182	495	CGCCAAGTACAATATTGTCACCTTCCTGCCTGTCAACCGCTTTGAGCAGTTCCA	Atp8b2
SRR029642.7084331	+	14	12	4	TGATGAGAACCGCACCTACCAGGCCTCCAGCCCCGATGAGTCTGCGAGTAAACT	2		0	-	NM_001201569	911	ACGGACCAGCTAGATGGTGAGACTGACTGGAAGCTGAAGGTGGCGGTGAGCTGC	Atp9b
SRR029642.3599845	+	5	3	15	AACCATTCAGATTACAGCATGGTTTTAGCTGGCCTCATTGTTCCTGAAAGAGAT	2		0	-	NM_009730	734	TATGCACTGCTGCATTTTTTCAGTGATGCTGCTTATAATCTGACTGGATTTAAT	Atrn
SRR029642.20126744	-	25	21	1	CTGGAAGATCAAACAAACTTGCTGGGCTTCTCGTCGGAGGGAGACAGTCTTCTG	2		1	+	NM_181415	1730	AGTGTGTATGACGAAGTGACCAAGTCCATCTATGTTCACGGAGGCTAAAAAGCA	Atrnl1
SRR029642.11802171	+	25	21	30	CTCGTCGGAGGGAGACAGTCTTCTGATTGACTACCAGATTTCCTTCAGCTTGCT	2	37:T>A,40:A>T	0	-	NM_181415	3703	TGCCATCAACTTCATCGCCAACCCAGAGCAGTCAAACAAAAACTTGGACATTTC	Atrnl1
SRR029642.15139051	-	25	19	24	GGGCTTCTCGTCGGAGGGAGCTTGCACGTGCGGCGGCCATGCGAACGTCTGTCA	2		1	+	NM_181415	1730	AGTGTGTATGACGAAGTGACCAAGTCCATCTATGTTCACGGAGGCTAAAAAGCA	Atrnl1
SRR029642.9215260	+	24	21	14	TCTCGTGCAGTTCTTTGTCACCTTCTTCAGACAGTCTTCTGATTGACTACCAGT	2		0	-	NM_181415	3569	GGTGACCAGTGCCAGCTATGTGACTCTGAAAATCGCTATGTTGGTAATCCACTT	Atrnl1
SRR029642.11563009	-	8	5	25	AAGTCAACACCAGGACTTGGCCCAGATTGTTCTCTGAATGTCCCTTCTACTGAG	2		1	+	NM_181415	1730	AGTGTGTATGACGAAGTGACCAAGTCCATCTATGTTCACGGAGGCTAAAAAGCA	Atrnl1
SRR029642.20126744	-	25	21	1	CTGGAAGATCAAACAAACTTGCTGGGCTTCTCGTCGGAGGGAGACAGTCTTCTG	2		0	+	NM_181415	3968	CAGATTGCGTTTTCACAACACAACACAATCATGGATCTCGTGCAGTTCTTTGTC	Atrnl1
SRR029642.20126744	-	25	21	1	CTGGAAGATCAAACAAACTTGCTGGGCTTCTCGTCGGAGGGAGACAGTCTTCTG	2		0	+	NM_181415	3994	AATCATGGATCTCGTGCAGTTCTTTGTCACCTTCTTCAGTTGTTTTTTATCTTT	Atrnl1
SRR029642.9215260	+	24	21	14	TCTCGTGCAGTTCTTTGTCACCTTCTTCAGACAGTCTTCTGATTGACTACCAGT	2		0	-	NM_181415	3703	TGCCATCAACTTCATCGCCAACCCAGAGCAGTCAAACAAAAACTTGGACATTTC	Atrnl1
SRR029642.15139051	-	25	19	24	GGGCTTCTCGTCGGAGGGAGCTTGCACGTGCGGCGGCCATGCGAACGTCTGTCA	2		0	+	NM_181415	3994	AATCATGGATCTCGTGCAGTTCTTTGTCACCTTCTTCAGTTGTTTTTTATCTTT	Atrnl1
SRR029642.11123339	+	25	19	15	AAACTTGCTGGGCTTCTCGTCGGAGGGAGCTTGCACGTGCGGCGGCCCTGCGAA	2	47:A>C	0	-	NM_181415	3703	TGCCATCAACTTCATCGCCAACCCAGAGCAGTCAAACAAAAACTTGGACATTTC	Atrnl1
SRR029642.11563009	-	8	5	25	AAGTCAACACCAGGACTTGGCCCAGATTGTTCTCTGAATGTCCCTTCTACTGAG	2		0	+	NM_181415	3994	AATCATGGATCTCGTGCAGTTCTTTGTCACCTTCTTCAGTTGTTTTTTATCTTT	Atrnl1
SRR029642.11563009	-	8	5	25	AAGTCAACACCAGGACTTGGCCCAGATTGTTCTCTGAATGTCCCTTCTACTGAG	2		0	+	NM_181415	3968	CAGATTGCGTTTTCACAACACAACACAATCATGGATCTCGTGCAGTTCTTTGTC	Atrnl1
SRR029642.15139051	-	25	19	24	GGGCTTCTCGTCGGAGGGAGCTTGCACGTGCGGCGGCCATGCGAACGTCTGTCA	2		0	+	NM_181415	3968	CAGATTGCGTTTTCACAACACAACACAATCATGGATCTCGTGCAGTTCTTTGTC	Atrnl1
SRR029642.11123339	+	25	19	15	AAACTTGCTGGGCTTCTCGTCGGAGGGAGCTTGCACGTGCGGCGGCCCTGCGAA	2	47:A>C	0	-	NM_181415	3569	GGTGACCAGTGCCAGCTATGTGACTCTGAAAATCGCTATGTTGGTAATCCACTT	Atrnl1
SRR029642.11802171	+	25	21	30	CTCGTCGGAGGGAGACAGTCTTCTGATTGACTACCAGATTTCCTTCAGCTTGCT	2	37:T>A,40:A>T	0	-	NM_181415	3569	GGTGACCAGTGCCAGCTATGTGACTCTGAAAATCGCTATGTTGGTAATCCACTT	Atrnl1
SRR029642.11802171	+	25	21	30	CTCGTCGGAGGGAGACAGTCTTCTGATTGACTACCAGATTTCCTTCAGCTTGCT	2	37:T>A,40:A>T	0	-	NM_181415	3730	GCAGTCAAACAAAAACTTGGACATTTCGATTAATGCTTCCAACAACTTTAATCT	Atrnl1
SRR029642.11123339	+	25	19	15	AAACTTGCTGGGCTTCTCGTCGGAGGGAGCTTGCACGTGCGGCGGCCCTGCGAA	2	47:A>C	0	-	NM_181415	3730	GCAGTCAAACAAAAACTTGGACATTTCGATTAATGCTTCCAACAACTTTAATCT	Atrnl1
SRR029642.9215260	+	24	21	14	TCTCGTGCAGTTCTTTGTCACCTTCTTCAGACAGTCTTCTGATTGACTACCAGT	2		0	-	NM_181415	3730	GCAGTCAAACAAAAACTTGGACATTTCGATTAATGCTTCCAACAACTTTAATCT	Atrnl1
SRR029642.388201	-	3	1	8	TGTGTCTTTGCACTGTGATGAAGGCAAATGGTACAGAAGTATCCTGCACCGTGC	2	49:G>T	0	+	NM_001199305	628	AACCTCTCTGCGAAAGAAAGAAAGACACCACCAGAACCTGGGCATCCCAGCTGC	Atxn1
SRR029642.12592692	+	4	1	1	AAACTTTCTTCTTGAGAAGAAACAAACCTGCTGTTGGCAGAGGAAGGATCCTGC	2	46:T>G	1	-	NM_001199305	242	CTTATCAAACAGTCTCTTCCTCCACTCCCTCCACAGGGAAGGGCGTCACCTGTC	Atxn1
SRR029642.10737805	-	5	1	34	AGTGAATGCTAAGTATCCTGCACCGTGCAACAAGTACGAGGGCGGTCGCTTCAA	2		0	+	NM_001199305	628	AACCTCTCTGCGAAAGAAAGAAAGACACCACCAGAACCTGGGCATCCCAGCTGC	Atxn1
SRR029642.2366639	+	4	1	24	AAACCTGCTGTTGGCAGAGGAAGTATCCTGCACCGTGCAAAAAGTAAGAGGGCG	2	40:C>A,46:C>A	1	-	NM_001199305	242	CTTATCAAACAGTCTCTTCCTCCACTCCCTCCACAGGGAAGGGCGTCACCTGTC	Atxn1
SRR029642.11963928	-	3	1	15	TTGCACTGTGATGAAGGCAAATGGTACAGAAGTATCCTGCACCGTGCAACAAGT	2		0	+	NM_001199305	628	AACCTCTCTGCGAAAGAAAGAAAGACACCACCAGAACCTGGGCATCCCAGCTGC	Atxn1
SRR029642.19229953	+	3	1	32	CAAATGGTACAGAAGTATCCTGCACCGTGCAACAAGTACGAGGGCGGTCGCGTC	2	51:T>G	1	-	NM_001199305	242	CTTACCCAACAGTCTCTTCCTCCACTCCCTCCACAGGGAAGGGCGTCACCTGTC	Atxn1
SRR029642.20768350	-	3	1	26	TGAAGGCAAATGGTACAGAAGTATCCTGCACCGTGCAACAAGTACGAGGGCGGT	2		0	+	NM_001199305	436	TCTTACACTGAATTTCTCTACTGCCACCCTTTCTACTCAAGCAACATCTTCAGG	Atxn1
SRR029642.2366639	+	4	1	24	AAACCTGCTGTTGGCAGAGGAAGTATCCTGCACCGTGCAAAAAGTAAGAGGGCG	2	40:C>A,46:C>A	1	-	NM_001199305	242	CTTACCCAACAGTCTCTTCCTCCACTCCCTCCACAGGGAAGGGCGTCACCTGTC	Atxn1
SRR029642.11963928	-	3	1	15	TTGCACTGTGATGAAGGCAAATGGTACAGAAGTATCCTGCACCGTGCAACAAGT	2		0	+	NM_001199305	436	TCTTACACTGAATTTCTCTACTGCCACCCTTTCTACTCAAGCAACATCTTCAGG	Atxn1
SRR029642.12592692	+	4	1	1	AAACTTTCTTCTTGAGAAGAAACAAACCTGCTGTTGGCAGAGGAAGGATCCTGC	2	46:T>G	1	-	NM_001199305	242	CTTACCCAACAGTCTCTTCCTCCACTCCCTCCACAGGGAAGGGCGTCACCTGTC	Atxn1
SRR029642.10737805	-	5	1	34	AGTGAATGCTAAGTATCCTGCACCGTGCAACAAGTACGAGGGCGGTCGCTTCAA	2		0	+	NM_001199305	436	TCTTACACTGAATTTCTCTACTGCCACCCTTTCTACTCAAGCAACATCTTCAGG	Atxn1
SRR029642.19229953	+	3	1	32	CAAATGGTACAGAAGTATCCTGCACCGTGCAACAAGTACGAGGGCGGTCGCGTC	2	51:T>G	0	-	NM_001199305	245	ATCCAACAGTCTCTTCCTCCACTCCCTCCACAGGGAAGGGCGTCACCTGTCAGA	Atxn1
SRR029642.4953502	-	3	1	4	TGCTTGTGGCTTTGCACTGTGATGAAGGCAAATGGTACAGAAGTATCCTGCACC	2		0	+	NM_001199305	436	TCTTACACTGAATTTCTCTACTGCCACCCTTTCTACTCAAGCAACATCTTCAGG	Atxn1
SRR029642.12592692	+	4	1	1	AAACTTTCTTCTTGAGAAGAAACAAACCTGCTGTTGGCAGAGGAAGGATCCTGC	2	46:T>G	0	-	NM_001199305	245	ATCCAACAGTCTCTTCCTCCACTCCCTCCACAGGGAAGGGCGTCACCTGTCAGA	Atxn1
SRR029642.388201	-	3	1	8	TGTGTCTTTGCACTGTGATGAAGGCAAATGGTACAGAAGTATCCTGCACCGTGC	2	49:G>T	0	+	NM_001199305	436	TCTTACACTGAATTTCTCTACTGCCACCCTTTCTACTCAAGCAACATCTTCAGG	Atxn1
SRR029642.2366639	+	4	1	24	AAACCTGCTGTTGGCAGAGGAAGTATCCTGCACCGTGCAAAAAGTAAGAGGGCG	2	40:C>A,46:C>A	0	-	NM_001199305	245	ATCCAACAGTCTCTTCCTCCACTCCCTCCACAGGGAAGGGCGTCACCTGTCAGA	Atxn1
SRR029642.20135983	-	5	1	28	GAGCATAGTGAATGCTAAGTATCCTGCACCGTGCAACAAGTACGAGGGCGGTCG	2		1	+	NM_009124	440	ACACTGAATTTCTCTACTGCCACCCTNTCTACTCAAGCAACATCTTCAGGAAAA	Atxn1
SRR029642.20768350	-	3	1	26	TGAAGGCAAATGGTACAGAAGTATCCTGCACCGTGCAACAAGTACGAGGGCGGT	2		0	+	NM_001199305	437	CTTACACTGAATTTCTCTACTGCCACCCTTTCTACTCAAGCAACATCTTCAGGA	Atxn1
SRR029642.17606993	-	3	1	31	GCAAAGGGTACAGAAGTATCCTGCACCGTGCAACAGGTACGAGGGCGGTCGCTT	2	18:A>G,48:T>G	1	+	NM_009124	440	ACACTGAATTTCTCTACTGCCACCCTNTCTACTCAAGCAACATCTTCAGGAAAA	Atxn1
SRR029642.12592692	+	4	1	1	AAACTTTCTTCTTGAGAAGAAACAAACCTGCTGTTGGCAGAGGAAGGATCCTGC	2	46:T>G	1	-	NM_001199305	242	CTTATCCAACATTCTCTTCCTCCACTCCCTCCACAGGGAAGGGCGTCACCTGTC	Atxn1
SRR029642.17272979	-	3	1	11	GGCTTTGCACTGTGATGAAGGCAAATGGTACAGAAGTATNCGGCACCGTGCAAC	2	12:T>G,14:C>N	1	+	NM_009124	440	ACACTGAATTTCTCTACTGCCACCCTNTCTACTCAAGCAACATCTTCAGGAAAA	Atxn1
SRR029642.19229953	+	3	1	32	CAAATGGTACAGAAGTATCCTGCACCGTGCAACAAGTACGAGGGCGGTCGCGTC	2	51:T>G	1	-	NM_001199305	242	CTTATCCAACATTCTCTTCCTCCACTCCCTCCACAGGGAAGGGCGTCACCTGTC	Atxn1
SRR029642.16374859	-	5	1	19	CTGGGAGCAGAGCATAGTGAATGCTAAGTATCCTGCACCGTGCAACAAGTACGA	2		1	+	NM_009124	440	ACACTGAATTTCTCTACTGCCACCCTNTCTACTCAAGCAACATCTTCAGGAAAA	Atxn1
SRR029642.13554600	-	5	1	15	CTGCCTGGGAGCAGAGCATAGTGAATGCTAAGTATCCTGCACCGTGCAACAAGT	2	51:T>G	0	+	NM_009124	628	AACCTCTCTGCGAAAGAAAGAAAGACACCACCAGAACCTGGGCATCCCAGCTGC	Atxn1
SRR029642.14780508	-	4	1	13	TGNGAAGAAACAAACCTGCTGTTGGCAGAGGAAGTATCCTGCACCGTGCAACAA	2	51:A>N	1	+	NM_009124	440	ACACTGAATTTCTCTACTGCCACCCTNTCTACTCAAGCAACATCTTCAGGAAAA	Atxn1
SRR029642.4953502	-	3	1	4	TGCTTGTGGCTTTGCACTGTGATGAAGGCAAATGGTACAGAAGTATCCTGCACC	2		0	+	NM_001199305	437	CTTACACTGAATTTCTCTACTGCCACCCTTTCTACTCAAGCAACATCTTCAGGA	Atxn1
SRR029642.13554600	-	5	1	15	CTGCCTGGGAGCAGAGCATAGTGAATGCTAAGTATCCTGCACCGTGCAACAAGT	2	51:T>G	1	+	NM_009124	440	ACACTGAATTTCTCTACTGCCACCCTNTCTACTCAAGCAACATCTTCAGGAAAA	Atxn1
SRR029642.19229953	+	3	1	32	CAAATGGTACAGAAGTATCCTGCACCGTGCAACAAGTACGAGGGCGGTCGCGTC	2	51:T>G	1	-	NM_001199305	242	CTTATCAAACAGTCTCTTCCTCCACTCCCTCCACAGGGAAGGGCGTCACCTGTC	Atxn1
SRR029642.11786654	-	3	1	34	AAGGGTACAGAAGTATCCTGCACCGTGCAACAAGTACGAGGGCGGTCGCTTCAA	2	51:T>G	1	+	NM_009124	440	ACACTGAATTTCTCTACTGCCACCCTNTCTACTCAAGCAACATCTTCAGGAAAA	Atxn1
SRR029642.10737805	-	5	1	34	AGTGAATGCTAAGTATCCTGCACCGTGCAACAAGTACGAGGGCGGTCGCTTCAA	2		0	+	NM_001199305	437	CTTACACTGAATTTCTCTACTGCCACCCTTTCTACTCAAGCAACATCTTCAGGA	Atxn1
SRR029642.11083486	-	5	1	10	GGAGGCTTCCTGGGAGCAGAGCATAGTGAATGCTAAGTATCCTGCACCGTGCAA	2		1	+	NM_009124	440	ACACTGAATTTCTCTACTGCCACCCTNTCTACTCAAGCAACATCTTCAGGAAAA	Atxn1
SRR029642.11963928	-	3	1	15	TTGCACTGTGATGAAGGCAAATGGTACAGAAGTATCCTGCACCGTGCAACAAGT	2		0	+	NM_001199305	437	CTTACACTGAATTTCTCTACTGCCACCCTTTCTACTCAAGCAACATCTTCAGGA	Atxn1
SRR029642.6920586	-	5	3	28	GAGCATAGTGAATGCTGTTCAGGCCTCTTACACTGAATTTCTCTACTGCCACCC	2		1	+	NM_009124	440	ACACTGAATTTCTCTACTGCCACCCTNTCTACTCAAGCAACATCTTCAGGAAAA	Atxn1
SRR029642.1576544	+	5	3	6	TCAGGGAGGCTTCCTGGGAGCAGAGCATAGTGAATGCTGTTCAGGCCTCTTACA	2		0	-	NM_009124	486	CAGGAAAAGATCTCCCGGGAAGGAAGTGGCTGCTTGTGGCTTTGCACTGTGATG	Atxn1
SRR029642.5656486	-	3	1	22	GTGATGAAGGCAAATGGTACAGAAGTATCCTGCACCGTGCAACAAGTACGAGGG	2		1	+	NM_009124	440	ACACTGAATTTCTCTACTGCCACCCTNTCTACTCAAGCAACATCTTCAGGAAAA	Atxn1
SRR029642.13729034	+	4	1	14	GAGAAGAAACAAACCTGCTGTTGGCAGAGGAAGTATCCTGCAACGTGCAACAAG	2	42:C>A	0	-	NM_009124	486	CAGGAAAAGATCTCCCGGGAAGGAAGTGGCTGCTTGTGGCTTTGCACTGTGATG	Atxn1
SRR029642.4308499	-	5	1	30	GCATAGTGAATGCTAAGTATCCTGCACCGTGCAACAAGTACGAGGGGGGTCGCT	2	7:C>G	1	+	NM_009124	440	ACACTGAATTTCTCTACTGCCACCCTNTCTACTCAAGCAACATCTTCAGGAAAA	Atxn1
SRR029642.388201	-	3	1	8	TGTGTCTTTGCACTGTGATGAAGGCAAATGGTACAGAAGTATCCTGCACCGTGC	2	49:G>T	0	+	NM_001199305	437	CTTACACTGAATTTCTCTACTGCCACCCTTTCTACTCAAGCAACATCTTCAGGA	Atxn1
SRR029642.20135983	-	5	1	28	GAGCATAGTGAATGCTAAGTATCCTGCACCGTGCAACAAGTACGAGGGCGGTCG	2		1	+	NM_009124	617	AGGGTATTTCTATCCTCTCTGCGAAAGAAAGAAAGACACCACCAGAACCTGGGC	Atxn1
SRR029642.14780508	-	4	1	13	TGNGAAGAAACAAACCTGCTGTTGGCAGAGGAAGTATCCTGCACCGTGCAACAA	2	51:A>N	0	+	NM_009124	628	AACCTCTCTGCGAAAGAAAGAAAGACACCACCAGAACCTGGGCATCCCAGCTGC	Atxn1
SRR029642.17234998	-	3	1	3	CTGCTTGTGGCTTTGCACTGTGATGAAGGCAAATGGTACAGAAGTATCCTGCAC	2		0	+	NM_001199304	430	CAGGCCTCTTACACTGAATTTCTCTACTGCCACCCTTTCTACTCAAGCAACATC	Atxn1
SRR029642.16374859	-	5	1	19	CTGGGAGCAGAGCATAGTGAATGCTAAGTATCCTGCACCGTGCAACAAGTACGA	2		0	+	NM_009124	628	AACCTCTCTGCGAAAGAAAGAAAGACACCACCAGAACCTGGGCATCCCAGCTGC	Atxn1
SRR029642.6145410	-	3	1	31	GCAAATGTTACAGAAGTATCCTGCACCGTGCAACAAGTACGAGGGCGGTCGCTT	2	46:G>T	0	+	NM_001199304	430	CAGGCCTCTTACACTGAATTTCTCTACTGCCACCCTTTCTACTCAAGCAACATC	Atxn1
SRR029642.20135983	-	5	1	28	GAGCATAGTGAATGCTAAGTATCCTGCACCGTGCAACAAGTACGAGGGCGGTCG	2		0	+	NM_009124	628	AACCTCTCTGCGAAAGAAAGAAAGACACCACCAGAACCTGGGCATCCCAGCTGC	Atxn1
SRR029642.1939387	-	3	1	31	GCAAATGGTACAGAAGTATCCTGCACCGTGCAACAAGTACGAGGGCGGTCGCTT	2		0	+	NM_001199304	430	CAGGCCTCTTACACTGAATTTCTCTACTGCCACCCTTTCTACTCAAGCAACATC	Atxn1
SRR029642.17272979	-	3	1	11	GGCTTTGCACTGTGATGAAGGCAAATGGTACAGAAGTATNCGGCACCGTGCAAC	2	12:T>G,14:C>N	0	+	NM_009124	628	AACCTCTCTGCGAAAGAAAGAAAGACACCACCAGAACCTGGGCATCCCAGCTGC	Atxn1
SRR029642.17606993	-	3	1	31	GCAAAGGGTACAGAAGTATCCTGCACCGTGCAACAGGTACGAGGGCGGTCGCTT	2	18:A>G,48:T>G	1	+	NM_009124	617	AGGGTATTTCTATCCTCTCTGCGAAAGAAAGAAAGACACCACCAGAACCTGGGC	Atxn1
SRR029642.2366639	+	4	1	24	AAACCTGCTGTTGGCAGAGGAAGTATCCTGCACCGTGCAAAAAGTAAGAGGGCG	2	40:C>A,46:C>A	1	-	NM_001199305	242	CTTATCCAACATTCTCTTCCTCCACTCCCTCCACAGGGAAGGGCGTCACCTGTC	Atxn1
SRR029642.17272979	-	3	1	11	GGCTTTGCACTGTGATGAAGGCAAATGGTACAGAAGTATNCGGCACCGTGCAAC	2	12:T>G,14:C>N	1	+	NM_009124	617	AGGGTATTTCTATCCTCTCTGCGAAAGAAAGAAAGACACCACCAGAACCTGGGC	Atxn1
SRR029642.17606993	-	3	1	31	GCAAAGGGTACAGAAGTATCCTGCACCGTGCAACAGGTACGAGGGCGGTCGCTT	2	18:A>G,48:T>G	0	+	NM_009124	628	AACCTCTCTGCGAAAGAAAGAAAGACACCACCAGAACCTGGGCATCCCAGCTGC	Atxn1
SRR029642.16374859	-	5	1	19	CTGGGAGCAGAGCATAGTGAATGCTAAGTATCCTGCACCGTGCAACAAGTACGA	2		1	+	NM_009124	617	AGGGTATTTCTATCCTCTCTGCGAAAGAAAGAAAGACACCACCAGAACCTGGGC	Atxn1
SRR029642.12592692	+	4	1	1	AAACTTTCTTCTTGAGAAGAAACAAACCTGCTGTTGGCAGAGGAAGGATCCTGC	2	46:T>G	1	-	NM_001199305	235	TGTCACCCTTATCCAACAGTCTCTTCCTCCACTCCCTCCACAGGGAAGGGCGTC	Atxn1
SRR029642.14780508	-	4	1	13	TGNGAAGAAACAAACCTGCTGTTGGCAGAGGAAGTATCCTGCACCGTGCAACAA	2	51:A>N	1	+	NM_009124	617	AGGGTATTTCTATCCTCTCTGCGAAAGAAAGAAAGACACCACCAGAACCTGGGC	Atxn1
SRR029642.19229953	+	3	1	32	CAAATGGTACAGAAGTATCCTGCACCGTGCAACAAGTACGAGGGCGGTCGCGTC	2	51:T>G	1	-	NM_001199305	235	TGTCACCCTTATCCAACAGTCTCTTCCTCCACTCCCTCCACAGGGAAGGGCGTC	Atxn1
SRR029642.13554600	-	5	1	15	CTGCCTGGGAGCAGAGCATAGTGAATGCTAAGTATCCTGCACCGTGCAACAAGT	2	51:T>G	1	+	NM_009124	617	AGGGTATTTCTATCCTCTCTGCGAAAGAAAGAAAGACACCACCAGAACCTGGGC	Atxn1
SRR029642.2366639	+	4	1	24	AAACCTGCTGTTGGCAGAGGAAGTATCCTGCACCGTGCAAAAAGTAAGAGGGCG	2	40:C>A,46:C>A	1	-	NM_001199305	235	TGTCACCCTTATCCAACAGTCTCTTCCTCCACTCCCTCCACAGGGAAGGGCGTC	Atxn1
SRR029642.11786654	-	3	1	34	AAGGGTACAGAAGTATCCTGCACCGTGCAACAAGTACGAGGGCGGTCGCTTCAA	2	51:T>G	1	+	NM_009124	617	AGGGTATTTCTATCCTCTCTGCGAAAGAAAGAAAGACACCACCAGAACCTGGGC	Atxn1
SRR029642.6920586	-	5	3	28	GAGCATAGTGAATGCTGTTCAGGCCTCTTACACTGAATTTCTCTACTGCCACCC	2		0	+	NM_009124	628	AACCTCTCTGCGAAAGAAAGAAAGACACCACCAGAACCTGGGCATCCCAGCTGC	Atxn1
SRR029642.11083486	-	5	1	10	GGAGGCTTCCTGGGAGCAGAGCATAGTGAATGCTAAGTATCCTGCACCGTGCAA	2		1	+	NM_009124	617	AGGGTATTTCTATCCTCTCTGCGAAAGAAAGAAAGACACCACCAGAACCTGGGC	Atxn1
SRR029642.11083486	-	5	1	10	GGAGGCTTCCTGGGAGCAGAGCATAGTGAATGCTAAGTATCCTGCACCGTGCAA	2		0	+	NM_009124	628	AACCTCTCTGCGAAAGAAAGAAAGACACCACCAGAACCTGGGCATCCCAGCTGC	Atxn1
SRR029642.6920586	-	5	3	28	GAGCATAGTGAATGCTGTTCAGGCCTCTTACACTGAATTTCTCTACTGCCACCC	2		1	+	NM_009124	617	AGGGTATTTCTATCCTCTCTGCGAAAGAAAGAAAGACACCACCAGAACCTGGGC	Atxn1
SRR029642.11786654	-	3	1	34	AAGGGTACAGAAGTATCCTGCACCGTGCAACAAGTACGAGGGCGGTCGCTTCAA	2	51:T>G	0	+	NM_009124	628	AACCTCTCTGCGAAAGAAAGAAAGACACCACCAGAACCTGGGCATCCCAGCTGC	Atxn1
SRR029642.5656486	-	3	1	22	GTGATGAAGGCAAATGGTACAGAAGTATCCTGCACCGTGCAACAAGTACGAGGG	2		1	+	NM_009124	617	AGGGTATTTCTATCCTCTCTGCGAAAGAAAGAAAGACACCACCAGAACCTGGGC	Atxn1
SRR029642.5656486	-	3	1	22	GTGATGAAGGCAAATGGTACAGAAGTATCCTGCACCGTGCAACAAGTACGAGGG	2		0	+	NM_009124	628	AACCTCTCTGCGAAAGAAAGAAAGACACCACCAGAACCTGGGCATCCCAGCTGC	Atxn1
SRR029642.4308499	-	5	1	30	GCATAGTGAATGCTAAGTATCCTGCACCGTGCAACAAGTACGAGGGGGGTCGCT	2	7:C>G	1	+	NM_009124	617	AGGGTATTTCTATCCTCTCTGCGAAAGAAAGAAAGACACCACCAGAACCTGGGC	Atxn1
SRR029642.4308499	-	5	1	30	GCATAGTGAATGCTAAGTATCCTGCACCGTGCAACAAGTACGAGGGGGGTCGCT	2	7:C>G	0	+	NM_009124	628	AACCTCTCTGCGAAAGAAAGAAAGACACCACCAGAACCTGGGCATCCCAGCTGC	Atxn1
SRR029642.4953502	-	3	1	4	TGCTTGTGGCTTTGCACTGTGATGAAGGCAAATGGTACAGAAGTATCCTGCACC	2		0	+	NM_001199305	442	ACTGAATTTCTCTACTGCCACCCTTTCTACTCAAGCAACATCTTCAGGAAAAGA	Atxn1
SRR029642.10737805	-	5	1	34	AGTGAATGCTAAGTATCCTGCACCGTGCAACAAGTACGAGGGCGGTCGCTTCAA	2		0	+	NM_001199305	442	ACTGAATTTCTCTACTGCCACCCTTTCTACTCAAGCAACATCTTCAGGAAAAGA	Atxn1
SRR029642.11083486	-	5	1	10	GGAGGCTTCCTGGGAGCAGAGCATAGTGAATGCTAAGTATCCTGCACCGTGCAA	2		0	+	NM_009124	438	TTACACTGAATTTCTCTACTGCCACCCTTTCTACTCAAGCAACATCTTCAGGAA	Atxn1
SRR029642.11963928	-	3	1	15	TTGCACTGTGATGAAGGCAAATGGTACAGAAGTATCCTGCACCGTGCAACAAGT	2		0	+	NM_001199305	442	ACTGAATTTCTCTACTGCCACCCTTTCTACTCAAGCAACATCTTCAGGAAAAGA	Atxn1
SRR029642.388201	-	3	1	8	TGTGTCTTTGCACTGTGATGAAGGCAAATGGTACAGAAGTATCCTGCACCGTGC	2	49:G>T	0	+	NM_001199305	442	ACTGAATTTCTCTACTGCCACCCTTTCTACTCAAGCAACATCTTCAGGAAAAGA	Atxn1
SRR029642.11963928	-	3	1	15	TTGCACTGTGATGAAGGCAAATGGTACAGAAGTATCCTGCACCGTGCAACAAGT	2		1	+	NM_001199305	636	TGCGAAAGAAAGAAAGACACCACCAGAACCTGGGCATCCCAGCTGCTGCGGGAA	Atxn1
SRR029642.10737805	-	5	1	34	AGTGAATGCTAAGTATCCTGCACCGTGCAACAAGTACGAGGGCGGTCGCTTCAA	2		1	+	NM_001199305	636	TGCGAAAGAAAGAAAGACACCACCAGAACCTGGGCATCCCAGCTGCTGCGGGAA	Atxn1
SRR029642.388201	-	3	1	8	TGTGTCTTTGCACTGTGATGAAGGCAAATGGTACAGAAGTATCCTGCACCGTGC	2	49:G>T	1	+	NM_001199305	636	TGCGAAAGAAAGAAAGACACCACCAGAACCTGGGCATCCCAGCTGCTGCGGGAA	Atxn1
SRR029642.20768350	-	3	1	26	TGAAGGCAAATGGTACAGAAGTATCCTGCACCGTGCAACAAGTACGAGGGCGGT	2		1	+	NM_001199305	636	TGCGAAAGAAAGAAAGACACCACCAGAACCTGGGCATCCCAGCTGCTGCGGGAA	Atxn1
SRR029642.4953502	-	3	1	4	TGCTTGTGGCTTTGCACTGTGATGAAGGCAAATGGTACAGAAGTATCCTGCACC	2		1	+	NM_001199305	636	TGCGAAAGAAAGAAAGACACCACCAGAACCTGGGCATCCCAGCTGCTGCGGGAA	Atxn1
SRR029642.5656486	-	3	1	22	GTGATGAAGGCAAATGGTACAGAAGTATCCTGCACCGTGCAACAAGTACGAGGG	2		0	+	NM_009124	438	TTACACTGAATTTCTCTACTGCCACCCTTTCTACTCAAGCAACATCTTCAGGAA	Atxn1
SRR029642.11963928	-	3	1	15	TTGCACTGTGATGAAGGCAAATGGTACAGAAGTATCCTGCACCGTGCAACAAGT	2		0	+	NM_001199305	439	TACACTGAATTTCTCTACTGCCACCCTTTCTACTCAAGCAACATCTTCAGGAAA	Atxn1
SRR029642.10737805	-	5	1	34	AGTGAATGCTAAGTATCCTGCACCGTGCAACAAGTACGAGGGCGGTCGCTTCAA	2		0	+	NM_001199305	439	TACACTGAATTTCTCTACTGCCACCCTTTCTACTCAAGCAACATCTTCAGGAAA	Atxn1
SRR029642.20768350	-	3	1	26	TGAAGGCAAATGGTACAGAAGTATCCTGCACCGTGCAACAAGTACGAGGGCGGT	2		0	+	NM_001199305	439	TACACTGAATTTCTCTACTGCCACCCTTTCTACTCAAGCAACATCTTCAGGAAA	Atxn1
SRR029642.4953502	-	3	1	4	TGCTTGTGGCTTTGCACTGTGATGAAGGCAAATGGTACAGAAGTATCCTGCACC	2		0	+	NM_001199305	439	TACACTGAATTTCTCTACTGCCACCCTTTCTACTCAAGCAACATCTTCAGGAAA	Atxn1
SRR029642.20135983	-	5	1	28	GAGCATAGTGAATGCTAAGTATCCTGCACCGTGCAACAAGTACGAGGGCGGTCG	2		0	+	NM_009124	609	GTTGGCAGAGGGTATTTCTAACCTCTCTGCGAAAGAAAGAAAGACACCACCAGA	Atxn1
SRR029642.17606993	-	3	1	31	GCAAAGGGTACAGAAGTATCCTGCACCGTGCAACAGGTACGAGGGCGGTCGCTT	2	18:A>G,48:T>G	0	+	NM_009124	609	GTTGGCAGAGGGTATTTCTAACCTCTCTGCGAAAGAAAGAAAGACACCACCAGA	Atxn1
SRR029642.17272979	-	3	1	11	GGCTTTGCACTGTGATGAAGGCAAATGGTACAGAAGTATNCGGCACCGTGCAAC	2	12:T>G,14:C>N	0	+	NM_009124	609	GTTGGCAGAGGGTATTTCTAACCTCTCTGCGAAAGAAAGAAAGACACCACCAGA	Atxn1
SRR029642.16374859	-	5	1	19	CTGGGAGCAGAGCATAGTGAATGCTAAGTATCCTGCACCGTGCAACAAGTACGA	2		0	+	NM_009124	609	GTTGGCAGAGGGTATTTCTAACCTCTCTGCGAAAGAAAGAAAGACACCACCAGA	Atxn1
SRR029642.14780508	-	4	1	13	TGNGAAGAAACAAACCTGCTGTTGGCAGAGGAAGTATCCTGCACCGTGCAACAA	2	51:A>N	0	+	NM_009124	609	GTTGGCAGAGGGTATTTCTAACCTCTCTGCGAAAGAAAGAAAGACACCACCAGA	Atxn1
SRR029642.13554600	-	5	1	15	CTGCCTGGGAGCAGAGCATAGTGAATGCTAAGTATCCTGCACCGTGCAACAAGT	2	51:T>G	0	+	NM_009124	609	GTTGGCAGAGGGTATTTCTAACCTCTCTGCGAAAGAAAGAAAGACACCACCAGA	Atxn1
SRR029642.11786654	-	3	1	34	AAGGGTACAGAAGTATCCTGCACCGTGCAACAAGTACGAGGGCGGTCGCTTCAA	2	51:T>G	0	+	NM_009124	609	GTTGGCAGAGGGTATTTCTAACCTCTCTGCGAAAGAAAGAAAGACACCACCAGA	Atxn1
SRR029642.11083486	-	5	1	10	GGAGGCTTCCTGGGAGCAGAGCATAGTGAATGCTAAGTATCCTGCACCGTGCAA	2		0	+	NM_009124	609	GTTGGCAGAGGGTATTTCTAACCTCTCTGCGAAAGAAAGAAAGACACCACCAGA	Atxn1
SRR029642.388201	-	3	1	8	TGTGTCTTTGCACTGTGATGAAGGCAAATGGTACAGAAGTATCCTGCACCGTGC	2	49:G>T	0	+	NM_001199305	439	TACACTGAATTTCTCTACTGCCACCCTTTCTACTCAAGCAACATCTTCAGGAAA	Atxn1
SRR029642.6920586	-	5	3	28	GAGCATAGTGAATGCTGTTCAGGCCTCTTACACTGAATTTCTCTACTGCCACCC	2		0	+	NM_009124	609	GTTGGCAGAGGGTATTTCTAACCTCTCTGCGAAAGAAAGAAAGACACCACCAGA	Atxn1
SRR029642.5656486	-	3	1	22	GTGATGAAGGCAAATGGTACAGAAGTATCCTGCACCGTGCAACAAGTACGAGGG	2		0	+	NM_009124	609	GTTGGCAGAGGGTATTTCTAACCTCTCTGCGAAAGAAAGAAAGACACCACCAGA	Atxn1
SRR029642.4308499	-	5	1	30	GCATAGTGAATGCTAAGTATCCTGCACCGTGCAACAAGTACGAGGGGGGTCGCT	2	7:C>G	0	+	NM_009124	609	GTTGGCAGAGGGTATTTCTAACCTCTCTGCGAAAGAAAGAAAGACACCACCAGA	Atxn1
SRR029642.13554600	-	5	1	15	CTGCCTGGGAGCAGAGCATAGTGAATGCTAAGTATCCTGCACCGTGCAACAAGT	2	51:T>G	0	+	NM_009124	438	TTACACTGAATTTCTCTACTGCCACCCTTTCTACTCAAGCAACATCTTCAGGAA	Atxn1
SRR029642.14780508	-	4	1	13	TGNGAAGAAACAAACCTGCTGTTGGCAGAGGAAGTATCCTGCACCGTGCAACAA	2	51:A>N	0	+	NM_009124	438	TTACACTGAATTTCTCTACTGCCACCCTTTCTACTCAAGCAACATCTTCAGGAA	Atxn1
SRR029642.388201	-	3	1	8	TGTGTCTTTGCACTGTGATGAAGGCAAATGGTACAGAAGTATCCTGCACCGTGC	2	49:G>T	0	+	NM_001199305	632	TCTCTGCGAAAGAAAGAAAGACACCACCAGAACCTGGGCATCCCAGCTGCTGAG	Atxn1
SRR029642.20768350	-	3	1	26	TGAAGGCAAATGGTACAGAAGTATCCTGCACCGTGCAACAAGTACGAGGGCGGT	2		2	+	NM_001199305	481	ATCTTCAGGAAAAGATCTCCCGGGAAGGAAGTGGCTGCTTGTGGCTTTTCACTT	Atxn1
SRR029642.20768350	-	3	1	26	TGAAGGCAAATGGTACAGAAGTATCCTGCACCGTGCAACAAGTACGAGGGCGGT	2		0	+	NM_001199305	442	ACTGAATTTCTCTACTGCCACCCTTTCTACTCAAGCAACATCTTCAGGAAAAGA	Atxn1
SRR029642.11963928	-	3	1	15	TTGCACTGTGATGAAGGCAAATGGTACAGAAGTATCCTGCACCGTGCAACAAGT	2		2	+	NM_001199305	481	ATCTTCAGGAAAAGATCTCCCGGGAAGGAAGTGGCTGCTTGTGGCTTTTCACTT	Atxn1
SRR029642.10737805	-	5	1	34	AGTGAATGCTAAGTATCCTGCACCGTGCAACAAGTACGAGGGCGGTCGCTTCAA	2		2	+	NM_001199305	481	ATCTTCAGGAAAAGATCTCCCGGGAAGGAAGTGGCTGCTTGTGGCTTTTCACTT	Atxn1
SRR029642.4953502	-	3	1	4	TGCTTGTGGCTTTGCACTGTGATGAAGGCAAATGGTACAGAAGTATCCTGCACC	2		2	+	NM_001199305	481	ATCTTCAGGAAAAGATCTCCCGGGAAGGAAGTGGCTGCTTGTGGCTTTTCACTT	Atxn1
SRR029642.388201	-	3	1	8	TGTGTCTTTGCACTGTGATGAAGGCAAATGGTACAGAAGTATCCTGCACCGTGC	2	49:G>T	2	+	NM_001199305	481	ATCTTCAGGAAAAGATCTCCCGGGAAGGAAGTGGCTGCTTGTGGCTTTTCACTT	Atxn1
SRR029642.20135983	-	5	1	28	GAGCATAGTGAATGCTAAGTATCCTGCACCGTGCAACAAGTACGAGGGCGGTCG	2		0	+	NM_009124	438	TTACACTGAATTTCTCTACTGCCACCCTTTCTACTCAAGCAACATCTTCAGGAA	Atxn1
SRR029642.11963928	-	3	1	15	TTGCACTGTGATGAAGGCAAATGGTACAGAAGTATCCTGCACCGTGCAACAAGT	2		0	+	NM_001199305	632	TCTCTGCGAAAGAAAGAAAGACACCACCAGAACCTGGGCATCCCAGCTGCTGAG	Atxn1
SRR029642.4953502	-	3	1	4	TGCTTGTGGCTTTGCACTGTGATGAAGGCAAATGGTACAGAAGTATCCTGCACC	2		0	+	NM_001199305	632	TCTCTGCGAAAGAAAGAAAGACACCACCAGAACCTGGGCATCCCAGCTGCTGAG	Atxn1
SRR029642.20768350	-	3	1	26	TGAAGGCAAATGGTACAGAAGTATCCTGCACCGTGCAACAAGTACGAGGGCGGT	2		0	+	NM_001199305	632	TCTCTGCGAAAGAAAGAAAGACACCACCAGAACCTGGGCATCCCAGCTGCTGAG	Atxn1
SRR029642.10737805	-	5	1	34	AGTGAATGCTAAGTATCCTGCACCGTGCAACAAGTACGAGGGCGGTCGCTTCAA	2		0	+	NM_001199305	632	TCTCTGCGAAAGAAAGAAAGACACCACCAGAACCTGGGCATCCCAGCTGCTGAG	Atxn1
SRR029642.17606993	-	3	1	31	GCAAAGGGTACAGAAGTATCCTGCACCGTGCAACAGGTACGAGGGCGGTCGCTT	2	18:A>G,48:T>G	0	+	NM_009124	438	TTACACTGAATTTCTCTACTGCCACCCTTTCTACTCAAGCAACATCTTCAGGAA	Atxn1
SRR029642.17272979	-	3	1	11	GGCTTTGCACTGTGATGAAGGCAAATGGTACAGAAGTATNCGGCACCGTGCAAC	2	12:T>G,14:C>N	0	+	NM_009124	438	TTACACTGAATTTCTCTACTGCCACCCTTTCTACTCAAGCAACATCTTCAGGAA	Atxn1
SRR029642.16374859	-	5	1	19	CTGGGAGCAGAGCATAGTGAATGCTAAGTATCCTGCACCGTGCAACAAGTACGA	2		0	+	NM_009124	438	TTACACTGAATTTCTCTACTGCCACCCTTTCTACTCAAGCAACATCTTCAGGAA	Atxn1
SRR029642.11786654	-	3	1	34	AAGGGTACAGAAGTATCCTGCACCGTGCAACAAGTACGAGGGCGGTCGCTTCAA	2	51:T>G	0	+	NM_009124	438	TTACACTGAATTTCTCTACTGCCACCCTTTCTACTCAAGCAACATCTTCAGGAA	Atxn1
SRR029642.6920586	-	5	3	28	GAGCATAGTGAATGCTGTTCAGGCCTCTTACACTGAATTTCTCTACTGCCACCC	2		0	+	NM_009124	438	TTACACTGAATTTCTCTACTGCCACCCTTTCTACTCAAGCAACATCTTCAGGAA	Atxn1
SRR029642.4308499	-	5	1	30	GCATAGTGAATGCTAAGTATCCTGCACCGTGCAACAAGTACGAGGGGGGTCGCT	2	7:C>G	0	+	NM_009124	438	TTACACTGAATTTCTCTACTGCCACCCTTTCTACTCAAGCAACATCTTCAGGAA	Atxn1
SRR029642.20768350	-	3	1	26	TGAAGGCAAATGGTACAGAAGTATCCTGCACCGTGCAACAAGTACGAGGGCGGT	2		0	+	NM_001199305	628	AACCTCTCTGCGAAAGAAAGAAAGACACCACCAGAACCTGGGCATCCCAGCTGC	Atxn1
SRR029642.4953502	-	3	1	4	TGCTTGTGGCTTTGCACTGTGATGAAGGCAAATGGTACAGAAGTATCCTGCACC	2		0	+	NM_001199305	628	AACCTCTCTGCGAAAGAAAGAAAGACACCACCAGAACCTGGGCATCCCAGCTGC	Atxn1
SRR029642.17234998	-	3	1	3	CTGCTTGTGGCTTTGCACTGTGATGAAGGCAAATGGTACAGAAGTATCCTGCAC	2		0	+	NM_001199304	410	AGCAGGAATGGTTTGGGGTTCAGGCCTCTTACACTGAATTTCTCTACTGCCACC	Atxn1
SRR029642.6145410	-	3	1	31	GCAAATGTTACAGAAGTATCCTGCACCGTGCAACAAGTACGAGGGCGGTCGCTT	2	46:G>T	0	+	NM_001199304	410	AGCAGGAATGGTTTGGGGTTCAGGCCTCTTACACTGAATTTCTCTACTGCCACC	Atxn1
SRR029642.1939387	-	3	1	31	GCAAATGGTACAGAAGTATCCTGCACCGTGCAACAAGTACGAGGGCGGTCGCTT	2		0	+	NM_001199304	410	AGCAGGAATGGTTTGGGGTTCAGGCCTCTTACACTGAATTTCTCTACTGCCACC	Atxn1
SRR029642.17234998	-	3	1	3	CTGCTTGTGGCTTTGCACTGTGATGAAGGCAAATGGTACAGAAGTATCCTGCAC	2		0	+	NM_001199304	428	TTCAGGCCTCTTACACTGAATTTCTCTACTGCCACCCTTTCTACTCAAGCAACA	Atxn1
SRR029642.6145410	-	3	1	31	GCAAATGTTACAGAAGTATCCTGCACCGTGCAACAAGTACGAGGGCGGTCGCTT	2	46:G>T	0	+	NM_001199304	428	TTCAGGCCTCTTACACTGAATTTCTCTACTGCCACCCTTTCTACTCAAGCAACA	Atxn1
SRR029642.1939387	-	3	1	31	GCAAATGGTACAGAAGTATCCTGCACCGTGCAACAAGTACGAGGGCGGTCGCTT	2		0	+	NM_001199304	428	TTCAGGCCTCTTACACTGAATTTCTCTACTGCCACCCTTTCTACTCAAGCAACA	Atxn1
SRR029642.20768350	-	3	1	26	TGAAGGCAAATGGTACAGAAGTATCCTGCACCGTGCAACAAGTACGAGGGCGGT	2		0	+	NM_001199305	430	CAGGCCTCTTACACTGAATTTCTCTACTGCCACCCTTTCTACTCAAGCAACATC	Atxn1
SRR029642.11963928	-	3	1	15	TTGCACTGTGATGAAGGCAAATGGTACAGAAGTATCCTGCACCGTGCAACAAGT	2		0	+	NM_001199305	430	CAGGCCTCTTACACTGAATTTCTCTACTGCCACCCTTTCTACTCAAGCAACATC	Atxn1
SRR029642.10737805	-	5	1	34	AGTGAATGCTAAGTATCCTGCACCGTGCAACAAGTACGAGGGCGGTCGCTTCAA	2		0	+	NM_001199305	430	CAGGCCTCTTACACTGAATTTCTCTACTGCCACCCTTTCTACTCAAGCAACATC	Atxn1
SRR029642.4953502	-	3	1	4	TGCTTGTGGCTTTGCACTGTGATGAAGGCAAATGGTACAGAAGTATCCTGCACC	2		0	+	NM_001199305	430	CAGGCCTCTTACACTGAATTTCTCTACTGCCACCCTTTCTACTCAAGCAACATC	Atxn1
SRR029642.388201	-	3	1	8	TGTGTCTTTGCACTGTGATGAAGGCAAATGGTACAGAAGTATCCTGCACCGTGC	2	49:G>T	0	+	NM_001199305	430	CAGGCCTCTTACACTGAATTTCTCTACTGCCACCCTTTCTACTCAAGCAACATC	Atxn1
SRR029642.20135983	-	5	1	28	GAGCATAGTGAATGCTAAGTATCCTGCACCGTGCAACAAGTACGAGGGCGGTCG	2		0	+	NM_009124	438	TTACACTGAATTTCTCTACTGCCACCCTTTCTACTCAAGCAACATCTTCAGGAA	Atxn1
SRR029642.17606993	-	3	1	31	GCAAAGGGTACAGAAGTATCCTGCACCGTGCAACAGGTACGAGGGCGGTCGCTT	2	18:A>G,48:T>G	0	+	NM_009124	438	TTACACTGAATTTCTCTACTGCCACCCTTTCTACTCAAGCAACATCTTCAGGAA	Atxn1
SRR029642.17272979	-	3	1	11	GGCTTTGCACTGTGATGAAGGCAAATGGTACAGAAGTATNCGGCACCGTGCAAC	2	12:T>G,14:C>N	0	+	NM_009124	438	TTACACTGAATTTCTCTACTGCCACCCTTTCTACTCAAGCAACATCTTCAGGAA	Atxn1
SRR029642.16374859	-	5	1	19	CTGGGAGCAGAGCATAGTGAATGCTAAGTATCCTGCACCGTGCAACAAGTACGA	2		0	+	NM_009124	438	TTACACTGAATTTCTCTACTGCCACCCTTTCTACTCAAGCAACATCTTCAGGAA	Atxn1
SRR029642.14780508	-	4	1	13	TGNGAAGAAACAAACCTGCTGTTGGCAGAGGAAGTATCCTGCACCGTGCAACAA	2	51:A>N	0	+	NM_009124	438	TTACACTGAATTTCTCTACTGCCACCCTTTCTACTCAAGCAACATCTTCAGGAA	Atxn1
SRR029642.13554600	-	5	1	15	CTGCCTGGGAGCAGAGCATAGTGAATGCTAAGTATCCTGCACCGTGCAACAAGT	2	51:T>G	0	+	NM_009124	438	TTACACTGAATTTCTCTACTGCCACCCTTTCTACTCAAGCAACATCTTCAGGAA	Atxn1
SRR029642.11786654	-	3	1	34	AAGGGTACAGAAGTATCCTGCACCGTGCAACAAGTACGAGGGCGGTCGCTTCAA	2	51:T>G	0	+	NM_009124	438	TTACACTGAATTTCTCTACTGCCACCCTTTCTACTCAAGCAACATCTTCAGGAA	Atxn1
SRR029642.11083486	-	5	1	10	GGAGGCTTCCTGGGAGCAGAGCATAGTGAATGCTAAGTATCCTGCACCGTGCAA	2		0	+	NM_009124	438	TTACACTGAATTTCTCTACTGCCACCCTTTCTACTCAAGCAACATCTTCAGGAA	Atxn1
SRR029642.6920586	-	5	3	28	GAGCATAGTGAATGCTGTTCAGGCCTCTTACACTGAATTTCTCTACTGCCACCC	2		0	+	NM_009124	438	TTACACTGAATTTCTCTACTGCCACCCTTTCTACTCAAGCAACATCTTCAGGAA	Atxn1
SRR029642.5656486	-	3	1	22	GTGATGAAGGCAAATGGTACAGAAGTATCCTGCACCGTGCAACAAGTACGAGGG	2		0	+	NM_009124	438	TTACACTGAATTTCTCTACTGCCACCCTTTCTACTCAAGCAACATCTTCAGGAA	Atxn1
SRR029642.4308499	-	5	1	30	GCATAGTGAATGCTAAGTATCCTGCACCGTGCAACAAGTACGAGGGGGGTCGCT	2	7:C>G	0	+	NM_009124	438	TTACACTGAATTTCTCTACTGCCACCCTTTCTACTCAAGCAACATCTTCAGGAA	Atxn1
SRR029642.20768350	-	3	1	26	TGAAGGCAAATGGTACAGAAGTATCCTGCACCGTGCAACAAGTACGAGGGCGGT	2		0	+	NM_001199305	634	TCTGCGAAAGAAAGAAAGACACCACCAGAACCTGGGCATCCCAGCTGCTGAGGG	Atxn1
SRR029642.11963928	-	3	1	15	TTGCACTGTGATGAAGGCAAATGGTACAGAAGTATCCTGCACCGTGCAACAAGT	2		0	+	NM_001199305	634	TCTGCGAAAGAAAGAAAGACACCACCAGAACCTGGGCATCCCAGCTGCTGAGGG	Atxn1
SRR029642.10737805	-	5	1	34	AGTGAATGCTAAGTATCCTGCACCGTGCAACAAGTACGAGGGCGGTCGCTTCAA	2		0	+	NM_001199305	634	TCTGCGAAAGAAAGAAAGACACCACCAGAACCTGGGCATCCCAGCTGCTGAGGG	Atxn1
SRR029642.4953502	-	3	1	4	TGCTTGTGGCTTTGCACTGTGATGAAGGCAAATGGTACAGAAGTATCCTGCACC	2		0	+	NM_001199305	634	TCTGCGAAAGAAAGAAAGACACCACCAGAACCTGGGCATCCCAGCTGCTGAGGG	Atxn1
SRR029642.388201	-	3	1	8	TGTGTCTTTGCACTGTGATGAAGGCAAATGGTACAGAAGTATCCTGCACCGTGC	2	49:G>T	0	+	NM_001199305	634	TCTGCGAAAGAAAGAAAGACACCACCAGAACCTGGGCATCCCAGCTGCTGAGGG	Atxn1
SRR029642.20768350	-	3	1	26	TGAAGGCAAATGGTACAGAAGTATCCTGCACCGTGCAACAAGTACGAGGGCGGT	2		0	+	NM_001199305	617	AGGGTATTTCTAACCTCTCTGCGAAAGAAAGAAAGACACCACCAGAACCTGGGC	Atxn1
SRR029642.11963928	-	3	1	15	TTGCACTGTGATGAAGGCAAATGGTACAGAAGTATCCTGCACCGTGCAACAAGT	2		0	+	NM_001199305	617	AGGGTATTTCTAACCTCTCTGCGAAAGAAAGAAAGACACCACCAGAACCTGGGC	Atxn1
SRR029642.10737805	-	5	1	34	AGTGAATGCTAAGTATCCTGCACCGTGCAACAAGTACGAGGGCGGTCGCTTCAA	2		0	+	NM_001199305	617	AGGGTATTTCTAACCTCTCTGCGAAAGAAAGAAAGACACCACCAGAACCTGGGC	Atxn1
SRR029642.4953502	-	3	1	4	TGCTTGTGGCTTTGCACTGTGATGAAGGCAAATGGTACAGAAGTATCCTGCACC	2		0	+	NM_001199305	617	AGGGTATTTCTAACCTCTCTGCGAAAGAAAGAAAGACACCACCAGAACCTGGGC	Atxn1
SRR029642.388201	-	3	1	8	TGTGTCTTTGCACTGTGATGAAGGCAAATGGTACAGAAGTATCCTGCACCGTGC	2	49:G>T	0	+	NM_001199305	617	AGGGTATTTCTAACCTCTCTGCGAAAGAAAGAAAGACACCACCAGAACCTGGGC	Atxn1
SRR029642.14910834	+	8	3	18	ACAAGAATAAAGAAAACCAAGACAAACTTTTCGATGTGGCCTGCAGTTTTTAGG	2		1	-	NM_016843	791	CAAACTCAGCAACCAGGAAAGGATCACACTGTTAGACAGAGTGATAGCCAAGCT	Atxn10
SRR029642.19559633	-	10	4	34	CCCCCCCCCCGGCCACTCTGACGCCGGGTGCTTTTGGTGAGCTTCTATGACGTT	2	44:T>C,47:G>C	0	+	NM_016843	1130	CATCTTCAGTCCCTCAGACTCTCTAAAAGCAGAGGGTGACATCGAACACATGAC	Atxn10
SRR029642.2282250	+	8	7	20	AAGAATAAAGAAAACCAAGACAAAGAAGCCCTGGTTACGATTCGGCTCCTGGAT	2		1	-	NM_016843	782	GATGTATGGCAAACTCAGCAACCAGGAAAGGATCACACTGTTAGACATAGTGAT	Atxn10
SRR029642.11302608	-	9	4	34	ACCAACCCCCGGCCACTCTGACGCCGGGTGCTTTTGGTGAGCTTCTATGACGTT	2	44:T>C,52:A>C	0	+	NM_016843	1130	CATCTTCAGTCCCTCAGACTCTCTAAAAGCAGAGGGTGACATCGAACACATGAC	Atxn10
SRR029642.14910834	+	8	3	18	ACAAGAATAAAGAAAACCAAGACAAACTTTTCGATGTGGCCTGCAGTTTTTAGG	2		1	-	NM_016843	782	TATGTATGGCAAACTCAGCAACCAGGAAAGGATNACACTGTTAGACATAGTGAT	Atxn10
SRR029642.3012435	-	9	4	34	AACCACCCCCGGCCACTCTGACGCCGGGTGCTTTTGGTGAGCTTCTATGACGTT	2	44:T>C,50:A>C	0	+	NM_016843	1130	CATCTTCAGTCCCTCAGACTCTCTAAAAGCAGAGGGTGACATCGAACACATGAC	Atxn10
SRR029642.14910834	+	8	3	18	ACAAGAATAAAGAAAACCAAGACAAACTTTTCGATGTGGCCTGCAGTTTTTAGG	2		0	-	NM_016843	1046	CTACCTGCAGGTTTTCCCTGGCCTGATGGAACGCGTGATTGATGTTTTACGAGT	Atxn10
SRR029642.2882323	-	10	4	34	CCCCCCCCCCGGCCACTCTGACGCCGGGTGCTTTTGGTGAGCTTCTATGACGTT	2	44:T>C,47:G>C	0	+	NM_016843	1130	CATCTTCAGTCCCTCAGACTCTCTAAAAGCAGAGGGTGACATCGAACACATGAC	Atxn10
SRR029642.4477061	+	8	1	25	TAAAGAAAACCAAGACAAAGGAAACAGCACCCAGAACGATCTTCCAGAGAGTCC	2		0	-	NM_016843	781	CTATGTATGGCAAACTCAGCAACCAGGAAAGGATCACACTGTTAGACATAGTGA	Atxn10
SRR029642.16735620	-	8	1	23	AATAAAGAAAACCAAGACAAAGGAAACAGCACCCAGAACGATCTTCCAGAGAGT	2		0	+	NM_016843	1130	CATCTTCAGTCCCTCAGACTCTCTAAAAGCAGAGGGTGACATCGAACACATGAC	Atxn10
SRR029642.3229179	+	8	7	20	AAGAATAAAGAAAACCAAGACAAAGAAGCCCTGGTTACGATTCGGCTCCTGGAT	2		0	-	NM_016843	1046	CTACCTGCAGGTTTTCCCTGGCCTGATGGAACGCGTGATTGATGTTTTACGAGT	Atxn10
SRR029642.19559633	-	10	4	34	CCCCCCCCCCGGCCACTCTGACGCCGGGTGCTTTTGGTGAGCTTCTATGACGTT	2	44:T>C,47:G>C	0	+	NM_016843	1116	AAAGAAAGCACGAACATCTTCAGTCCCTCAGACTCTCTAAAAGCAGAGGGTGAC	Atxn10
SRR029642.4477061	+	8	1	25	TAAAGAAAACCAAGACAAAGGAAACAGCACCCAGAACGATCTTCCAGAGAGTCC	2		0	-	NM_016843	786	TATGGCAAACTCAGCAACCAGGAAAGGATCACACTGTTAGACATAGTGATAGCC	Atxn10
SRR029642.11302608	-	9	4	34	ACCAACCCCCGGCCACTCTGACGCCGGGTGCTTTTGGTGAGCTTCTATGACGTT	2	44:T>C,52:A>C	0	+	NM_016843	1116	AAAGAAAGCACGAACATCTTCAGTCCCTCAGACTCTCTAAAAGCAGAGGGTGAC	Atxn10
SRR029642.14910834	+	8	3	18	ACAAGAATAAAGAAAACCAAGACAAACTTTTCGATGTGGCCTGCAGTTTTTAGG	2		0	-	NM_016843	1046	CTACCTGCAGGTTTTCCCTGGCCTGATGGAACGCGTGATTGATGTTTTACGAGT	Atxn10
SRR029642.2882323	-	10	4	34	CCCCCCCCCCGGCCACTCTGACGCCGGGTGCTTTTGGTGAGCTTCTATGACGTT	2	44:T>C,47:G>C	0	+	NM_016843	1116	AAAGAAAGCACGAACATCTTCAGTCCCTCAGACTCTCTAAAAGCAGAGGGTGAC	Atxn10
SRR029642.4477061	+	8	1	25	TAAAGAAAACCAAGACAAAGGAAACAGCACCCAGAACGATCTTCCAGAGAGTCC	2		0	-	NM_016843	1046	CTACCTGCAGGTTTTCCCTGGCCTGATGGAACGCGTGATTGATGTTTTACGAGT	Atxn10
SRR029642.16735620	-	8	1	23	AATAAAGAAAACCAAGACAAAGGAAACAGCACCCAGAACGATCTTCCAGAGAGT	2		0	+	NM_016843	1116	AAAGAAAGCACGAACATCTTCAGTCCCTCAGACTCTCTAAAAGCAGAGGGTGAC	Atxn10
SRR029642.4477061	+	8	1	25	TAAAGAAAACCAAGACAAAGGAAACAGCACCCAGAACGATCTTCCAGAGAGTCC	2		1	-	NM_016843	791	CAAACTCAGCAACCAGGAAAGGATCACACTGTTAGACAGAGTGATAGCCAAGCT	Atxn10
SRR029642.3012435	-	9	4	34	AACCACCCCCGGCCACTCTGACGCCGGGTGCTTTTGGTGAGCTTCTATGACGTT	2	44:T>C,50:A>C	0	+	NM_016843	1116	AAAGAAAGCACGAACATCTTCAGTCCCTCAGACTCTCTAAAAGCAGAGGGTGAC	Atxn10
SRR029642.14910834	+	8	3	18	ACAAGAATAAAGAAAACCAAGACAAACTTTTCGATGTGGCCTGCAGTTTTTAGG	2		1	-	NM_016843	541	TTGGGGTCCACGCCTTCCCAGAACTCTTCATGTCTTGCTTGAACCATCCAGACA	Atxn10
SRR029642.14910834	+	8	3	18	ACAAGAATAAAGAAAACCAAGACAAACTTTTCGATGTGGCCTGCAGTTTTTAGG	2		0	-	NM_016843	783	ATGTATGGCAAACTCAGCAACCAGGAAAGGATCACACTGTTAGACATAGTGATA	Atxn10
SRR029642.2282250	+	8	7	20	AAGAATAAAGAAAACCAAGACAAAGAAGCCCTGGTTACGATTCGGCTCCTGGAT	2		0	-	NM_016843	1046	CTACCTGCAGGTTTTCCCTGGCCTGATGGAACGCGTGATTGATGTTTTACGAGT	Atxn10
SRR029642.2282250	+	8	7	20	AAGAATAAAGAAAACCAAGACAAAGAAGCCCTGGTTACGATTCGGCTCCTGGAT	2		0	-	NM_016843	1046	CTACCTGCAGGTTTTCCCTGGCCTGATGGAACGCGTGATTGATGTTTTACGAGT	Atxn10
SRR029642.4477061	+	8	1	25	TAAAGAAAACCAAGACAAAGGAAACAGCACCCAGAACGATCTTCCAGAGAGTCC	2		0	-	NM_016843	783	ATGTATGGCAAACTCAGCAACCAGGAAAGGATCACACTGTTAGACATAGTGATA	Atxn10
SRR029642.3229179	+	8	7	20	AAGAATAAAGAAAACCAAGACAAAGAAGCCCTGGTTACGATTCGGCTCCTGGAT	2		0	-	NM_016843	783	ATGTATGGCAAACTCAGCAACCAGGAAAGGATCACACTGTTAGACATAGTGATA	Atxn10
SRR029642.4477061	+	8	1	25	TAAAGAAAACCAAGACAAAGGAAACAGCACCCAGAACGATCTTCCAGAGAGTCC	2		1	-	NM_016843	782	TATGTATGGCAAACTCAGCAACCAGGAAAGGATNACACTGTTAGACATAGTGAT	Atxn10
SRR029642.2282250	+	8	7	20	AAGAATAAAGAAAACCAAGACAAAGAAGCCCTGGTTACGATTCGGCTCCTGGAT	2		0	-	NM_016843	781	CTATGTATGGCAAACTCAGCAACCAGGAAAGGATCACACTGTTAGACATAGTGA	Atxn10
SRR029642.2282250	+	8	7	20	AAGAATAAAGAAAACCAAGACAAAGAAGCCCTGGTTACGATTCGGCTCCTGGAT	2		0	-	NM_016843	783	ATGTATGGCAAACTCAGCAACCAGGAAAGGATCACACTGTTAGACATAGTGATA	Atxn10
SRR029642.4477061	+	8	1	25	TAAAGAAAACCAAGACAAAGGAAACAGCACCCAGAACGATCTTCCAGAGAGTCC	2		0	-	NM_016843	1046	CTACCTGCAGGTTTTCCCTGGCCTGATGGAACGCGTGATTGATGTTTTACGAGT	Atxn10
SRR029642.3229179	+	8	7	20	AAGAATAAAGAAAACCAAGACAAAGAAGCCCTGGTTACGATTCGGCTCCTGGAT	2		0	-	NM_016843	1046	CTACCTGCAGGTTTTCCCTGGCCTGATGGAACGCGTGATTGATGTTTTACGAGT	Atxn10
SRR029642.3229179	+	8	7	20	AAGAATAAAGAAAACCAAGACAAAGAAGCCCTGGTTACGATTCGGCTCCTGGAT	2		1	-	NM_016843	791	CAAACTCAGCAACCAGGAAAGGATCACACTGTTAGACAGAGTGATAGCCAAGCT	Atxn10
SRR029642.3229179	+	8	7	20	AAGAATAAAGAAAACCAAGACAAAGAAGCCCTGGTTACGATTCGGCTCCTGGAT	2		0	-	NM_016843	786	TATGGCAAACTCAGCAACCAGGAAAGGATCACACTGTTAGACATAGTGATAGCC	Atxn10
SRR029642.3229179	+	8	7	20	AAGAATAAAGAAAACCAAGACAAAGAAGCCCTGGTTACGATTCGGCTCCTGGAT	2		1	-	NM_016843	782	GATGTATGGCAAACTCAGCAACCAGGAAAGGATCACACTGTTAGACATAGTGAT	Atxn10
SRR029642.2282250	+	8	7	20	AAGAATAAAGAAAACCAAGACAAAGAAGCCCTGGTTACGATTCGGCTCCTGGAT	2		1	-	NM_016843	782	TATGTATGGCAAACTCAGCAACCAGGAAAGGATNACACTGTTAGACATAGTGAT	Atxn10
SRR029642.3229179	+	8	7	20	AAGAATAAAGAAAACCAAGACAAAGAAGCCCTGGTTACGATTCGGCTCCTGGAT	2		1	-	NM_016843	782	TATGTATGGCAAACTCAGCAACCAGGAAAGGATNACACTGTTAGACATAGTGAT	Atxn10
SRR029642.14910834	+	8	3	18	ACAAGAATAAAGAAAACCAAGACAAACTTTTCGATGTGGCCTGCAGTTTTTAGG	2		1	-	NM_016843	782	GATGTATGGCAAACTCAGCAACCAGGAAAGGATCACACTGTTAGACATAGTGAT	Atxn10
SRR029642.4477061	+	8	1	25	TAAAGAAAACCAAGACAAAGGAAACAGCACCCAGAACGATCTTCCAGAGAGTCC	2		1	-	NM_016843	782	GATGTATGGCAAACTCAGCAACCAGGAAAGGATCACACTGTTAGACATAGTGAT	Atxn10
SRR029642.2282250	+	8	7	20	AAGAATAAAGAAAACCAAGACAAAGAAGCCCTGGTTACGATTCGGCTCCTGGAT	2		0	-	NM_016843	786	TATGGCAAACTCAGCAACCAGGAAAGGATCACACTGTTAGACATAGTGATAGCC	Atxn10
SRR029642.3229179	+	8	7	20	AAGAATAAAGAAAACCAAGACAAAGAAGCCCTGGTTACGATTCGGCTCCTGGAT	2		0	-	NM_016843	787	ATGGCAAACTCAGCAACCAGGAAAGGATCACACTGTTAGACATAGTGATAGCCA	Atxn10
SRR029642.14910834	+	8	3	18	ACAAGAATAAAGAAAACCAAGACAAACTTTTCGATGTGGCCTGCAGTTTTTAGG	2		0	-	NM_016843	786	TATGGCAAACTCAGCAACCAGGAAAGGATCACACTGTTAGACATAGTGATAGCC	Atxn10
SRR029642.4477061	+	8	1	25	TAAAGAAAACCAAGACAAAGGAAACAGCACCCAGAACGATCTTCCAGAGAGTCC	2		1	-	NM_016843	541	TTGGGGTCCACGCCTTCCCAGAACTCTTCATGTCTTGCTTGAACCATCCAGACA	Atxn10
SRR029642.14910834	+	8	3	18	ACAAGAATAAAGAAAACCAAGACAAACTTTTCGATGTGGCCTGCAGTTTTTAGG	2		0	-	NM_016843	782	TATGTATGGCAAACTCAGCAACCAGGAAAGGATCACACTGTTAGACATAGTGAT	Atxn10
SRR029642.4477061	+	8	1	25	TAAAGAAAACCAAGACAAAGGAAACAGCACCCAGAACGATCTTCCAGAGAGTCC	2		0	-	NM_016843	787	ATGGCAAACTCAGCAACCAGGAAAGGATCACACTGTTAGACATAGTGATAGCCA	Atxn10
SRR029642.14910834	+	8	3	18	ACAAGAATAAAGAAAACCAAGACAAACTTTTCGATGTGGCCTGCAGTTTTTAGG	2		0	-	NM_016843	787	ATGGCAAACTCAGCAACCAGGAAAGGATCACACTGTTAGACATAGTGATAGCCA	Atxn10
SRR029642.2282250	+	8	7	20	AAGAATAAAGAAAACCAAGACAAAGAAGCCCTGGTTACGATTCGGCTCCTGGAT	2		1	-	NM_016843	791	CAAACTCAGCAACCAGGAAAGGATCACACTGTTAGACAGAGTGATAGCCAAGCT	Atxn10
SRR029642.3229179	+	8	7	20	AAGAATAAAGAAAACCAAGACAAAGAAGCCCTGGTTACGATTCGGCTCCTGGAT	2		0	-	NM_016843	781	CTATGTATGGCAAACTCAGCAACCAGGAAAGGATCACACTGTTAGACATAGTGA	Atxn10
SRR029642.2282250	+	8	7	20	AAGAATAAAGAAAACCAAGACAAAGAAGCCCTGGTTACGATTCGGCTCCTGGAT	2		0	-	NM_016843	787	ATGGCAAACTCAGCAACCAGGAAAGGATCACACTGTTAGACATAGTGATAGCCA	Atxn10
SRR029642.2282250	+	8	7	20	AAGAATAAAGAAAACCAAGACAAAGAAGCCCTGGTTACGATTCGGCTCCTGGAT	2		0	-	NM_016843	782	TATGTATGGCAAACTCAGCAACCAGGAAAGGATCACACTGTTAGACATAGTGAT	Atxn10
SRR029642.3229179	+	8	7	20	AAGAATAAAGAAAACCAAGACAAAGAAGCCCTGGTTACGATTCGGCTCCTGGAT	2		0	-	NM_016843	782	TATGTATGGCAAACTCAGCAACCAGGAAAGGATCACACTGTTAGACATAGTGAT	Atxn10
SRR029642.14910834	+	8	3	18	ACAAGAATAAAGAAAACCAAGACAAACTTTTCGATGTGGCCTGCAGTTTTTAGG	2		0	-	NM_016843	781	CTATGTATGGCAAACTCAGCAACCAGGAAAGGATCACACTGTTAGACATAGTGA	Atxn10
SRR029642.3229179	+	8	7	20	AAGAATAAAGAAAACCAAGACAAAGAAGCCCTGGTTACGATTCGGCTCCTGGAT	2		1	-	NM_016843	541	TTGGGGTCCACGCCTTCCCAGAACTCTTCATGTCTTGCTTGAACCATCCAGACA	Atxn10
SRR029642.2282250	+	8	7	20	AAGAATAAAGAAAACCAAGACAAAGAAGCCCTGGTTACGATTCGGCTCCTGGAT	2		1	-	NM_016843	541	TTGGGGTCCACGCCTTCCCAGAACTCTTCATGTCTTGCTTGAACCATCCAGACA	Atxn10
SRR029642.4477061	+	8	1	25	TAAAGAAAACCAAGACAAAGGAAACAGCACCCAGAACGATCTTCCAGAGAGTCC	2		0	-	NM_016843	280	GGGATCCCTCCCAAGTGGAACATCTGGCTTCCAGTCTGCAGCTAATCACTGAAT	Atxn10
SRR029642.3229179	+	8	7	20	AAGAATAAAGAAAACCAAGACAAAGAAGCCCTGGTTACGATTCGGCTCCTGGAT	2		0	-	NM_016843	280	GGGATCCCTCCCAAGTGGAACATCTGGCTTCCAGTCTGCAGCTAATCACTGAAT	Atxn10
SRR029642.14910834	+	8	3	18	ACAAGAATAAAGAAAACCAAGACAAACTTTTCGATGTGGCCTGCAGTTTTTAGG	2		0	-	NM_016843	280	GGGATCCCTCCCAAGTGGAACATCTGGCTTCCAGTCTGCAGCTAATCACTGAAT	Atxn10
SRR029642.2282250	+	8	7	20	AAGAATAAAGAAAACCAAGACAAAGAAGCCCTGGTTACGATTCGGCTCCTGGAT	2		0	-	NM_016843	280	GGGATCCCTCCCAAGTGGAACATCTGGCTTCCAGTCTGCAGCTAATCACTGAAT	Atxn10
SRR029642.4477061	+	8	1	25	TAAAGAAAACCAAGACAAAGGAAACAGCACCCAGAACGATCTTCCAGAGAGTCC	2		0	-	NM_016843	782	TATGTATGGCAAACTCAGCAACCAGGAAAGGATCACACTGTTAGACATAGTGAT	Atxn10
SRR029642.6068410	-	5	1	6	TCGCGGCCAGCGAGGAGCTGGAGCTGGAGAATGATGTGAGGTCGGAACAGTAGC	2	51:A>G	0	+	NM_009125	984	AGAGATGCTTTTACTGACTCTGCTCTCAGCGCAAAGGTGAATGGTGAGCACAAG	Atxn2
SRR029642.11813983	+	5	1	8	ACCTCGCACTATTCTTGGCTCAATTACAGCAAGAAGCAAGAAGGCTCACTTTGT	2		0	-	NM_001167914	169	TAGCCCTGTGGAGCTATCCTCAATTGCACACCAGCTGGATGAAGAGGAGAGGCT	Atxn3
SRR029642.14773666	-	5	1	3	GGGCCTGGTTGAAACAAAGTTGGCAATTATTCCTGGCGGAGGCATTGTGGTGCT	2		1	+	NM_016709	483	ACCATCGCAGCCATAGACGGCCTTGCCCTCGGAGGGGGTCTGGAGCTGGCTNTA	Auh
SRR029642.13030373	+	12	10	12	GGCAGATTTATCACCATCAACAAAAAGTCAAGCTCTTCCACTCCTATCCTCCTG	2		1	-	NM_177047	896	GAGAAGCTCTTCCCAATGGTTTGTCTTTTCACTCAAAGAAGAGCCGGCTCAGCC	Auts2
SRR029642.15626594	-	1	1	30	AGGGACTCAGACAGAAAGATGTAGCAGTTAAGCCGCAGGAACGTGCGGAGAAAC	2		1	+	NM_177047	895	CGAGAAGCTCTTACCAATGGTTTGTCTTTTCACTCAAAGAAGAGACGGCTCAGC	Auts2
SRR029642.18214756	+	1	1	10	GAAGAGAAAGAAGATGCCTAAGGGACTCAGACAGAAAGATGTAGCAGTTAAGCC	2		1	-	NM_177047	896	GAGAAGCTCTTCCCAATGGTTTGTCTTTTCACTCAAAGAAGAGCCGGCTCAGCC	Auts2
SRR029642.10052085	-	1	1	6	GTGGGAAGAGAAAGAAGAGGCCTAAGGGACTCAGACAGAAAGATGTAGCAGTTA	2	35:T>G,53:T>G	1	+	NM_177047	895	CGAGAAGCTCTTACCAATGGTTTGTCTTTTCACTCAAAGAAGAGACGGCTCAGC	Auts2
SRR029642.18214756	+	1	1	10	GAAGAGAAAGAAGATGCCTAAGGGACTCAGACAGAAAGATGTAGCAGTTAAGCC	2		0	-	NM_177047	2306	GGGCCCTTTCGGGTCACTCCAAGGAGCATTCCAGCCGAAGACATCCAACCCTAT	Auts2
SRR029642.9383768	-	1	1	7	TGGGAAGAGAAAGAAGATGCCTAAGGGACTCAGACAGAAAGATGTAGCAGTTAA	2		1	+	NM_177047	895	CGAGAAGCTCTTACCAATGGTTTGTCTTTTCACTCAAAGAAGAGACGGCTCAGC	Auts2
SRR029642.13030373	+	12	10	12	GGCAGATTTATCACCATCAACAAAAAGTCAAGCTCTTCCACTCCTATCCTCCTG	2		0	-	NM_177047	2306	GGGCCCTTTCGGGTCACTCCAAGGAGCATTCCAGCCGAAGACATCCAACCCTAT	Auts2
SRR029642.6070306	-	1	1	3	ACCTTGGGAAGAGAAAGAAGATGCCTAAGGGACTCAGACAGAAAGATGTAGCAG	2		1	+	NM_177047	895	CGAGAAGCTCTTACCAATGGTTTGTCTTTTCACTCAAAGAAGAGACGGCTCAGC	Auts2
SRR029642.15626594	-	1	1	30	AGGGACTCAGACAGAAAGATGTAGCAGTTAAGCCGCAGGAACGTGCGGAGAAAC	2		0	+	NM_177047	921	TTTTCACTCAAAGAAGAGCCGGCTCAGCCACTCACACCACTACAGCTCAGATCG	Auts2
SRR029642.10052085	-	1	1	6	GTGGGAAGAGAAAGAAGAGGCCTAAGGGACTCAGACAGAAAGATGTAGCAGTTA	2	35:T>G,53:T>G	0	+	NM_177047	921	TTTTCACTCAAAGAAGAGCCGGCTCAGCCACTCACACCACTACAGCTCAGATCG	Auts2
SRR029642.9383768	-	1	1	7	TGGGAAGAGAAAGAAGATGCCTAAGGGACTCAGACAGAAAGATGTAGCAGTTAA	2		0	+	NM_177047	921	TTTTCACTCAAAGAAGAGCCGGCTCAGCCACTCACACCACTACAGCTCAGATCG	Auts2
SRR029642.6070306	-	1	1	3	ACCTTGGGAAGAGAAAGAAGATGCCTAAGGGACTCAGACAGAAAGATGTAGCAG	2		0	+	NM_177047	921	TTTTCACTCAAAGAAGAGCCGGCTCAGCCACTCACACCACTACAGCTCAGATCG	Auts2
SRR029642.10052085	-	1	1	6	GTGGGAAGAGAAAGAAGAGGCCTAAGGGACTCAGACAGAAAGATGTAGCAGTTA	2	35:T>G,53:T>G	0	+	NM_177047	906	TACCAATGGTTTGTCTTTTCACTCAAAGAAGAGCCGGCTCAGCCACTCACACCA	Auts2
SRR029642.9383768	-	1	1	7	TGGGAAGAGAAAGAAGATGCCTAAGGGACTCAGACAGAAAGATGTAGCAGTTAA	2		0	+	NM_177047	906	TACCAATGGTTTGTCTTTTCACTCAAAGAAGAGCCGGCTCAGCCACTCACACCA	Auts2
SRR029642.6070306	-	1	1	3	ACCTTGGGAAGAGAAAGAAGATGCCTAAGGGACTCAGACAGAAAGATGTAGCAG	2		0	+	NM_177047	906	TACCAATGGTTTGTCTTTTCACTCAAAGAAGAGCCGGCTCAGCCACTCACACCA	Auts2
SRR029642.15626594	-	1	1	30	AGGGACTCAGACAGAAAGATGTAGCAGTTAAGCCGCAGGAACGTGCGGAGAAAC	2		0	+	NM_177047	906	TACCAATGGTTTGTCTTTTCACTCAAAGAAGAGCCGGCTCAGCCACTCACACCA	Auts2
SRR029642.15626594	-	1	1	30	AGGGACTCAGACAGAAAGATGTAGCAGTTAAGCCGCAGGAACGTGCGGAGAAAC	2		0	+	NM_177047	911	ATGGTTTGTCTTTTCACTCAAAGAAGAGCCGGCTCAGCCACTCACACCACTACA	Auts2
SRR029642.10052085	-	1	1	6	GTGGGAAGAGAAAGAAGAGGCCTAAGGGACTCAGACAGAAAGATGTAGCAGTTA	2	35:T>G,53:T>G	0	+	NM_177047	911	ATGGTTTGTCTTTTCACTCAAAGAAGAGCCGGCTCAGCCACTCACACCACTACA	Auts2
SRR029642.9383768	-	1	1	7	TGGGAAGAGAAAGAAGATGCCTAAGGGACTCAGACAGAAAGATGTAGCAGTTAA	2		0	+	NM_177047	911	ATGGTTTGTCTTTTCACTCAAAGAAGAGCCGGCTCAGCCACTCACACCACTACA	Auts2
SRR029642.6070306	-	1	1	3	ACCTTGGGAAGAGAAAGAAGATGCCTAAGGGACTCAGACAGAAAGATGTAGCAG	2		0	+	NM_177047	911	ATGGTTTGTCTTTTCACTCAAAGAAGAGCCGGCTCAGCCACTCACACCACTACA	Auts2
SRR029642.12336953	+	12	8	9	AATAAGCATCCGGCACTTTCAGAGATAAATCCAAAGTTCTGTTTTACATTTCTC	2		0	-	NM_030235	894	AGGCATGATTGAGCATGGCCTCAGTGACTGTTCTCAGTATAGACCTCGAAAGAG	Avl9
SRR029642.15371081	+	1	1	23	CAACGAAGGCAGAGAGCTCAGGAGAGATTGATTCCCTTGGGAGCTGTAAGTACT	2		1	-	NM_009733	436	AATGAATGTCCAGGAGCAGGGTTTCCCCTTGGACCTCGGAGCAAGTTNCACCGA	Axin1
SRR029642.16882800	-	7	5	25	TACTGAACTTCTATAGATGAGCTTTGAAGGTACAATCGGGTGGGAAAGCCAAGA	2	15:T>G	0	+	NM_178640	1034	ATACAGGATCTGCAGGTGGAAGATGCCTTACTGCAGGAGGAAAGCAGTGTCCAT	B3galnt2
SRR029642.14093423	+	4	2	24	ATCCTTCCCTTGTTANCGCAGATTTGAGGCAGAGTAGTCTACCGGGGAGACATG	2	15:C>N	2	-	NM_001081204	256	CTTTCATGCANAGAGAGCAGAACAGTTGAAAAAAAACATCTTAAAGCAGGCTGC	B3galtl
SRR029642.16027796	-	9	5	2	TTGTTGCAGTGAAAACGTGCAAGAAATTTCATGCTGACAGAACTTTTCTGTAAC	2		0	+	NM_001081204	770	TTTTGTACAGAAGATGTGGACCCCCGCTGCGTCACCACGTTCCATTCTTTCCTA	B3galtl
SRR029642.2722229	+	4	2	24	ATCCTTCCCTTGTTACCGCAGATTTGAGGCAGAGTAGTCTACCGGGGAGACATG	2		2	-	NM_001081204	256	CTTTCATGCANAGAGAGCAGAACAGTTGAAAAAAAACATCTTAAAGCAGGCTGC	B3galtl
SRR029642.2722229	+	4	2	24	ATCCTTCCCTTGTTACCGCAGATTTGAGGCAGAGTAGTCTACCGGGGAGACATG	2		0	-	NM_001081204	256	CTTTCATGCCAAGAGAGCAGAACAGTTGAAAAAAAACATCTTAAAGCAGGCTGC	B3galtl
SRR029642.14093423	+	4	2	24	ATCCTTCCCTTGTTANCGCAGATTTGAGGCAGAGTAGTCTACCGGGGAGACATG	2	15:C>N	0	-	NM_001081204	256	CTTTCATGCCAAGAGAGCAGAACAGTTGAAAAAAAACATCTTAAAGCAGGCTGC	B3galtl
SRR029642.15434155	-	2	1	8	CATCAGGGACGACAAGAAGGAAGCCGAGAAACCCTGAGTTAGATTGGCTGAGCA	2	40:C>A	0	+	NM_183155	337	GAAAACCAAGAGGAGGCACGAGCAGTTGAGCAGCAGCGGCTCTGAGTCAGACAC	BC002230
SRR029642.12077693	+	3	1	31	AAACCCTTCCCAGGGTTAAACCACTGTTAAGGGATCAAGCTCAGCCTTCTGCAC	2	51:A>C	0	-	NM_030561	307	GACTTCATTTTGGAAGGCATGGATCTTGCTGCTAATGAGATCAGCATCTATGAC	BC004004
SRR029642.6989953	+	7	5	32	TGTCGTTCCTAGCCTCCAAGTCTGTTATAAAAAGTATGCTGCGGGACCCCTCTC	2	31:C>A,49:T>C	2	-	NM_207264	603	GAATGACTTTTGCTATGGACCGCTGGTGGACAGCATCAAGCACGCTATTGGCTA	BC052040
SRR029642.379642	-	4	1	18	GACATTCAGGATATATATTCTATCAGAAACTGTGCATAAACCTGTGAGAGAAGC	2		1	+	NM_001081184	238	AGNGCTGCAGTGACCATGTGGTTGTGCGGACAGCCTGCAGCGAGGGACTGGTGG	BC057079
SRR029642.352314	-	3	1	14	GGGGATACTCAACCTGACTCCTTCTGCCAGAAACTGTGCATAAACCTGTGAGAG	2	53:T>G	0	+	NM_001081184	238	AGTGCTGCAGTGACCATGTGGTTGTGCGGACAGCCTGCAGCGAGGGACTGGTGG	BC057079
SRR029642.352314	-	3	1	14	GGGGATACTCAACCTGACTCCTTCTGCCAGAAACTGTGCATAAACCTGTGAGAG	2	53:T>G	1	+	NM_001081184	238	AGNGCTGCAGTGACCATGTGGTTGTGCGGACAGCCTGCAGCGAGGGACTGGTGG	BC057079
SRR029642.379642	-	4	1	18	GACATTCAGGATATATATTCTATCAGAAACTGTGCATAAACCTGTGAGAGAAGC	2		0	+	NM_001081184	238	AGTGCTGCAGTGACCATGTGGTTGTGCGGACAGCCTGCAGCGAGGGACTGGTGG	BC057079
SRR029642.20199957	-	3	1	14	TGGGATACTCAACCTGACTCCTTCTGCCAGAAACTGTGCATAAACCTGTGAGAG	2		1	+	NM_001081184	238	AGNGCTGCAGTGACCATGTGGTTGTGCGGACAGCCTGCAGCGAGGGACTGGTGG	BC057079
SRR029642.20199957	-	3	1	14	TGGGATACTCAACCTGACTCCTTCTGCCAGAAACTGTGCATAAACCTGTGAGAG	2		0	+	NM_001081184	238	AGTGCTGCAGTGACCATGTGGTTGTGCGGACAGCCTGCAGCGAGGGACTGGTGG	BC057079
SRR029642.20199957	-	3	1	14	TGGGATACTCAACCTGACTCCTTCTGCCAGAAACTGTGCATAAACCTGTGAGAG	2		1	+	NM_001081184	348	CTGACTCCTTCTGCCAGGAATATGTCTGGATTGATAAAAGCCCTTATGAAATTA	BC057079
SRR029642.11721740	+	3	1	12	AATGGGATACTCAACCTGACTCCTTCTGCCAGAAACTGTGCATAAACCTGTGAG	2		1	-	NM_001081184	106	ATTTTCCGAATTCTCTTATCCAGTCTCAGGCTGTAGGTCATTTTATTGCTGCTG	BC057079
SRR029642.352314	-	3	1	14	GGGGATACTCAACCTGACTCCTTCTGCCAGAAACTGTGCATAAACCTGTGAGAG	2	53:T>G	1	+	NM_001081184	348	CTGACTCCTTCTGCCAGGAATATGTCTGGATTGATAAAAGCCCTTATGAAATTA	BC057079
SRR029642.379642	-	4	1	18	GACATTCAGGATATATATTCTATCAGAAACTGTGCATAAACCTGTGAGAGAAGC	2		1	+	NM_001081184	348	CTGACTCCTTCTGCCAGGAATATGTCTGGATTGATAAAAGCCCTTATGAAATTA	BC057079
SRR029642.2567836	-	3	1	30	AAATCGAGAAGCTGGTCGATGACAGTGAGAAGCATGCTTTCCACTGCTCTCCCT	2		0	+	NM_007520	1832	AGCTCGACTGTATCCATGACATCCGCAGAAGGAGTAAGAACAGAATCGCCGCGC	Bach1
SRR029642.19023151	-	3	1	28	GGAAATCGAGAAGCTGGTCGATGACAGTGAGAAGCATGCTTTCCACTGCTCTCC	2		0	+	NM_007520	1846	CATGACATCCGCAGAAGGAGTAAGAACAGAATCGCCGCGCAACGCTGTCGCAAG	Bach1
SRR029642.19023151	-	3	1	28	GGAAATCGAGAAGCTGGTCGATGACAGTGAGAAGCATGCTTTCCACTGCTCTCC	2		0	+	NM_007520	1832	AGCTCGACTGTATCCATGACATCCGCAGAAGGAGTAAGAACAGAATCGCCGCGC	Bach1
SRR029642.2567836	-	3	1	30	AAATCGAGAAGCTGGTCGATGACAGTGAGAAGCATGCTTTCCACTGCTCTCCCT	2		0	+	NM_007520	1846	CATGACATCCGCAGAAGGAGTAAGAACAGAATCGCCGCGCAACGCTGTCGCAAG	Bach1
SRR029642.8097748	-	12	11	28	GTGACAGACAATCTGGAACTTTGTCCAGATCATCAGCAACCTGCTGGCAGAAGA	2		2	+	NM_174991	3094	CTGATGGGCCCCAATGCCAAGGAGCTCTTTCGGCTGGTGGAGGACGTTGTGGTT	Bai1
SRR029642.19462130	-	21	19	20	GGACCTGCAGCGGCTGTTGTCCTGAGCATCTGCACGACCACCACCGCGTTCCTG	2		0	+	NM_175642	2611	ATTCTAAAGTCATCGTGGTCACAATCAGGCCTGAACCTAAAACAACTGACTCAT	Bai3
SRR029642.5885772	-	21	19	16	CGTTGGACCTCCAGCGGCTGGTGTCCTGAGCATCTGCACGACCACCACCGCGTT	2	33:T>G,43:G>C	0	+	NM_175642	3238	TAGTAGTGGCCACATCTGTAGGCTTCACTAGGACGAAAGGATACGGCACGGATC	Bai3
SRR029642.12427316	+	18	16	24	AGACTCAGACACACAATAAGGAACGAGTCTTTGGGAACGTGGTCCACCCAGGGA	2		0	-	NM_175642	2818	GTGATCGGCTCTCTACCTTCGCCATTTTGGCTCAGCAACCTAGAGAAATAGTCA	Bai3
SRR029642.19462130	-	21	19	20	GGACCTGCAGCGGCTGTTGTCCTGAGCATCTGCACGACCACCACCGCGTTCCTG	2		0	+	NM_175642	3238	TAGTAGTGGCCACATCTGTAGGCTTCACTAGGACGAAAGGATACGGCACGGATC	Bai3
SRR029642.19600130	-	15	12	22	TGTTATGGGATGACTCAAAATCTGGCGAGCATTCAGAAGCTCCCTGCTGCATCT	2		2	+	NM_175642	3238	TAGTAGTGGCCACATCTGTAGGCTTCACTAGGACGAAAGGATACGGCACCGCTC	Bai3
SRR029642.19462130	-	21	19	20	GGACCTGCAGCGGCTGTTGTCCTGAGCATCTGCACGACCACCACCGCGTTCCTG	2		0	+	NM_175642	3222	TGGGGGCTGCCAGCTTTAGTAGTGGCCACATCTGTAGGCTTCACTAGGACGAAA	Bai3
SRR029642.20838338	+	18	16	30	AGACACACAATAAGGAACGAGTCTTTGGGAACGTGGTCCACCCAGGGATGTAAA	2		0	-	NM_175642	2818	GTGATCGGCTCTCTACCTTCGCCATTTTGGCTCAGCAACCTAGAGAAATAGTCA	Bai3
SRR029642.11529136	-	15	12	15	TATTGCGTGTTATGGGATGACTCAAAATCTGGCGAGCATTCAGAAGCTCCCTGC	2		0	+	NM_175642	3222	TGGGGGCTGCCAGCTTTAGTAGTGGCCACATCTGTAGGCTTCACTAGGACGAAA	Bai3
SRR029642.14222089	+	18	16	15	TGGTTGGACAGACTCAGACACACAATAAGGAACGAGTCTTTGGGAACGTGGTCC	2		0	-	NM_175642	2807	GAAATGCTTATGTGATCGGCTCTCTACCTTCGCCATTTTGGCTCAGCAACCTAG	Bai3
SRR029642.16593653	-	21	19	20	GGCCCTGCAGCGGCTTTTGTCCTGAGCATCTGCACGACCACCACCGCGTTCCTG	2	38:G>T,51:A>C	0	+	NM_175642	3222	TGGGGGCTGCCAGCTTTAGTAGTGGCCACATCTGTAGGCTTCACTAGGACGAAA	Bai3
SRR029642.14222089	+	18	16	15	TGGTTGGACAGACTCAGACACACAATAAGGAACGAGTCTTTGGGAACGTGGTCC	2		0	-	NM_175642	2818	GTGATCGGCTCTCTACCTTCGCCATTTTGGCTCAGCAACCTAGAGAAATAGTCA	Bai3
SRR029642.16492659	-	21	19	5	CTCTATGCCTTCGTTGGACCTGCAGCGGCTGTTGTCCTGAGCATCTGCACGACC	2		0	+	NM_175642	3222	TGGGGGCTGCCAGCTTTAGTAGTGGCCACATCTGTAGGCTTCACTAGGACGAAA	Bai3
SRR029642.16593653	-	21	19	20	GGCCCTGCAGCGGCTTTTGTCCTGAGCATCTGCACGACCACCACCGCGTTCCTG	2	38:G>T,51:A>C	0	+	NM_175642	2611	ATTCTAAAGTCATCGTGGTCACAATCAGGCCTGAACCTAAAACAACTGACTCAT	Bai3
SRR029642.19600130	-	15	12	22	TGTTATGGGATGACTCAAAATCTGGCGAGCATTCAGAAGCTCCCTGCTGCATCT	2		0	+	NM_175642	3222	TGGGGGCTGCCAGCTTTAGTAGTGGCCACATCTGTAGGCTTCACTAGGACGAAA	Bai3
SRR029642.19462130	-	21	19	20	GGACCTGCAGCGGCTGTTGTCCTGAGCATCTGCACGACCACCACCGCGTTCCTG	2		2	+	NM_175642	3238	TAGTAGTGGCCACATCTGTAGGCTTCACTAGGACGAAAGGATACGGCACCGCTC	Bai3
SRR029642.20276367	-	21	19	7	CTATGCCTTCGTTGGACCTGCAGCGGCTGTTGTCCTGAGCATCTGCACGACCAA	2	0:C>A	0	+	NM_175642	3222	TGGGGGCTGCCAGCTTTAGTAGTGGCCACATCTGTAGGCTTCACTAGGACGAAA	Bai3
SRR029642.12077283	+	18	16	2	AATATCCTCATACTGGTTGGACAGACTCAGACACACAATAAGGAACGAGTCTTT	2		0	-	NM_175642	2807	GAAATGCTTATGTGATCGGCTCTCTACCTTCGCCATTTTGGCTCAGCAACCTAG	Bai3
SRR029642.20276367	-	21	19	7	CTATGCCTTCGTTGGACCTGCAGCGGCTGTTGTCCTGAGCATCTGCACGACCAA	2	0:C>A	0	+	NM_175642	3239	AGTAGTGGCCACATCTGTAGGCTTCACTAGGACGAAAGGATACGGCACGGATCA	Bai3
SRR029642.20276367	-	21	19	7	CTATGCCTTCGTTGGACCTGCAGCGGCTGTTGTCCTGAGCATCTGCACGACCAA	2	0:C>A	0	+	NM_175642	2611	ATTCTAAAGTCATCGTGGTCACAATCAGGCCTGAACCTAAAACAACTGACTCAT	Bai3
SRR029642.19600130	-	15	12	22	TGTTATGGGATGACTCAAAATCTGGCGAGCATTCAGAAGCTCCCTGCTGCATCT	2		0	+	NM_175642	3239	AGTAGTGGCCACATCTGTAGGCTTCACTAGGACGAAAGGATACGGCACGGATCA	Bai3
SRR029642.20276367	-	21	19	7	CTATGCCTTCGTTGGACCTGCAGCGGCTGTTGTCCTGAGCATCTGCACGACCAA	2	0:C>A	2	+	NM_175642	3238	TAGTAGTGGCCACATCTGTAGGCTTCACTAGGACGAAAGGATACGGCACCGCTC	Bai3
SRR029642.19462130	-	21	19	20	GGACCTGCAGCGGCTGTTGTCCTGAGCATCTGCACGACCACCACCGCGTTCCTG	2		0	+	NM_175642	3239	AGTAGTGGCCACATCTGTAGGCTTCACTAGGACGAAAGGATACGGCACGGATCA	Bai3
SRR029642.16492659	-	21	19	5	CTCTATGCCTTCGTTGGACCTGCAGCGGCTGTTGTCCTGAGCATCTGCACGACC	2		2	+	NM_175642	3238	TAGTAGTGGCCACATCTGTAGGCTTCACTAGGACGAAAGGATACGGCACCGCTC	Bai3
SRR029642.16593653	-	21	19	20	GGCCCTGCAGCGGCTTTTGTCCTGAGCATCTGCACGACCACCACCGCGTTCCTG	2	38:G>T,51:A>C	0	+	NM_175642	3239	AGTAGTGGCCACATCTGTAGGCTTCACTAGGACGAAAGGATACGGCACGGATCA	Bai3
[truncated: 5,856 more rows]
